# Supplementary material for: Characterizing polymorphic inversions in human genomes by single-cell sequencing
Source: PubMed Central journal article supplement — Genome Res. 2016 Nov;26(11):1575–87. doi: 10.1101/gr.201160.115 (PMC5088599; doi:10.1101/gr.201160.115), 2016-11

# Genome-wide comparison of inversion features

## Supplemental Data File S1: Comprehensive genomic maps of inversions

To visualize inversions in the context of surrounding genomic features we created Circos diagrams of each chromosome. Within the ideogram plot we included the Invert.R histograms of the W/C ratios for the adult male (blue) and newborn female (pink), and genotyped inversions as light green (heterozygous) or dark green (homozygous). The innermost track highlights the predicted reference mis-orientations or minor alleles (red) and polymorphic inversions (orange) found in the population study, along with the sequences that were subtracted from the inversion profiles, namely the Always Watson Crick (AWC) regions (blue) and reference assembly sequence gaps (dark grey). All inversions listed in the Database of Genomic Variants (DGV) are layered in the outside of the ideogram (fuchsia bars), along with Refseq genes (outermost grey bars). All intra-chromosomal segmental duplications appear as lines, which are either non-palindromic (grey) or palindromic (purple).

The Circos plots are compiled into an interactive 'clickable' PDF file. From the whole genome view on pg2, click on the chromosome number to jump to that page and view the chromosome at high resolution. To return to the whole genome view, click at the top right corner of the page

## Key:

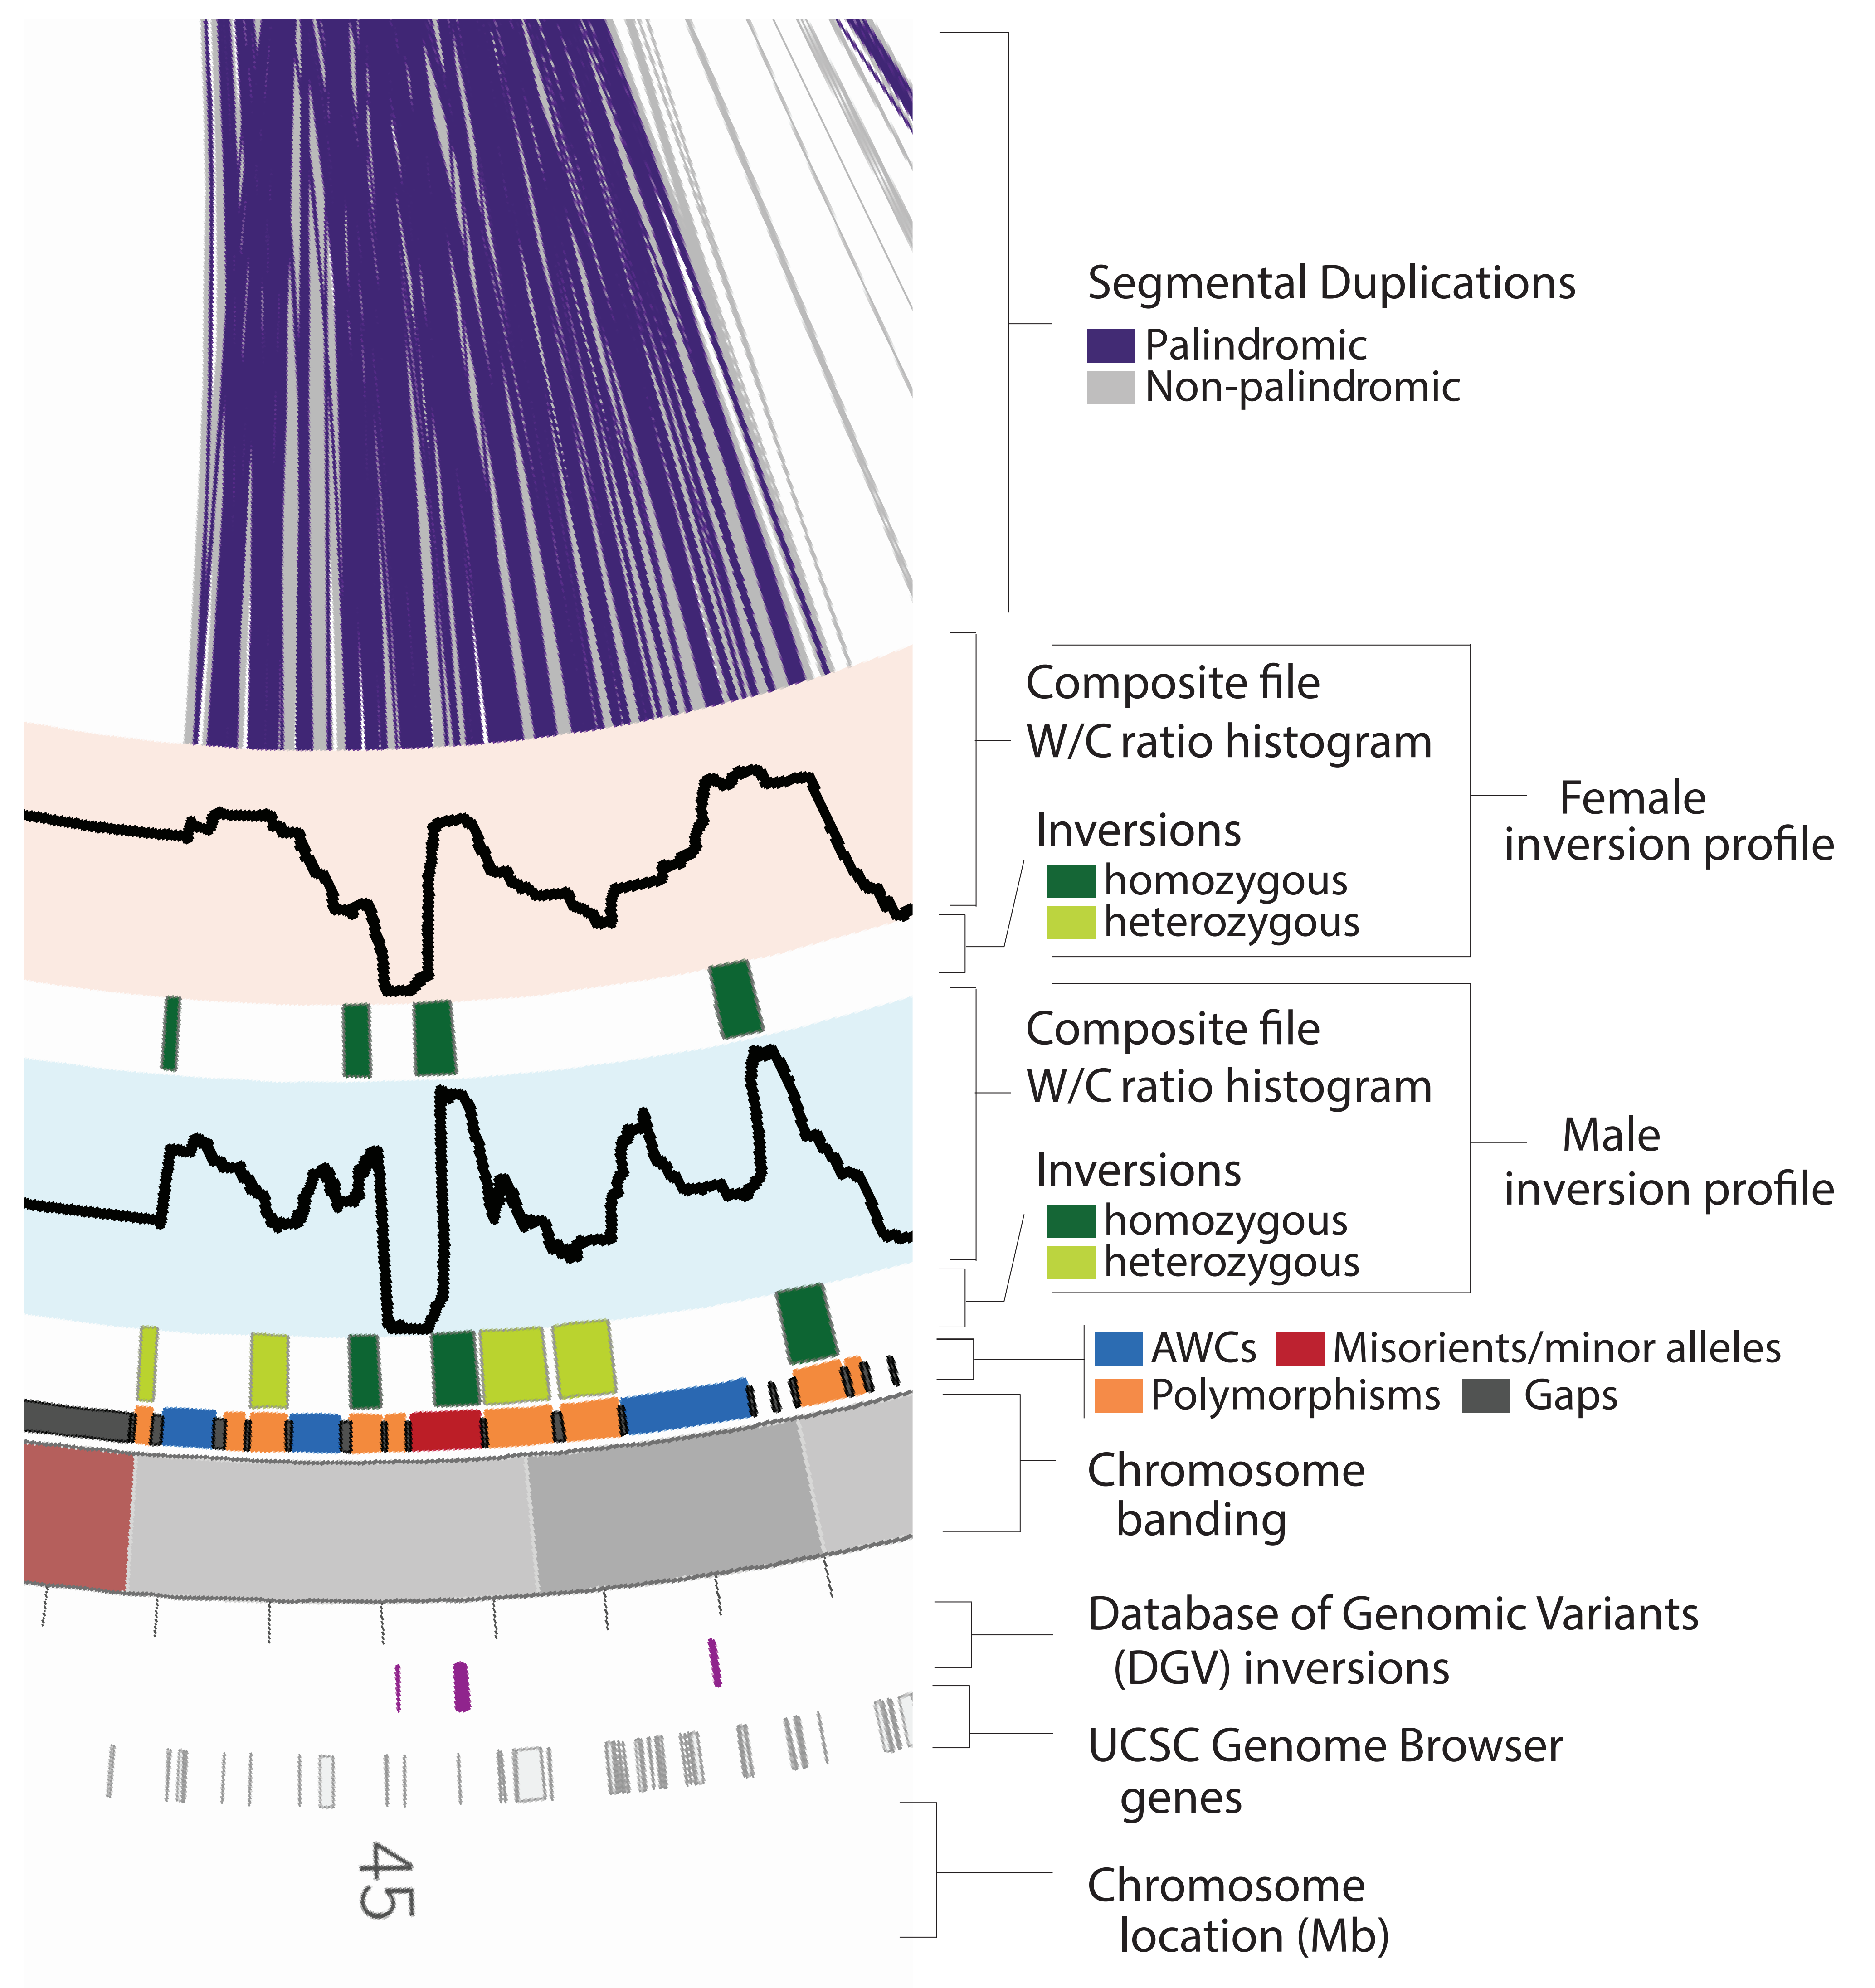



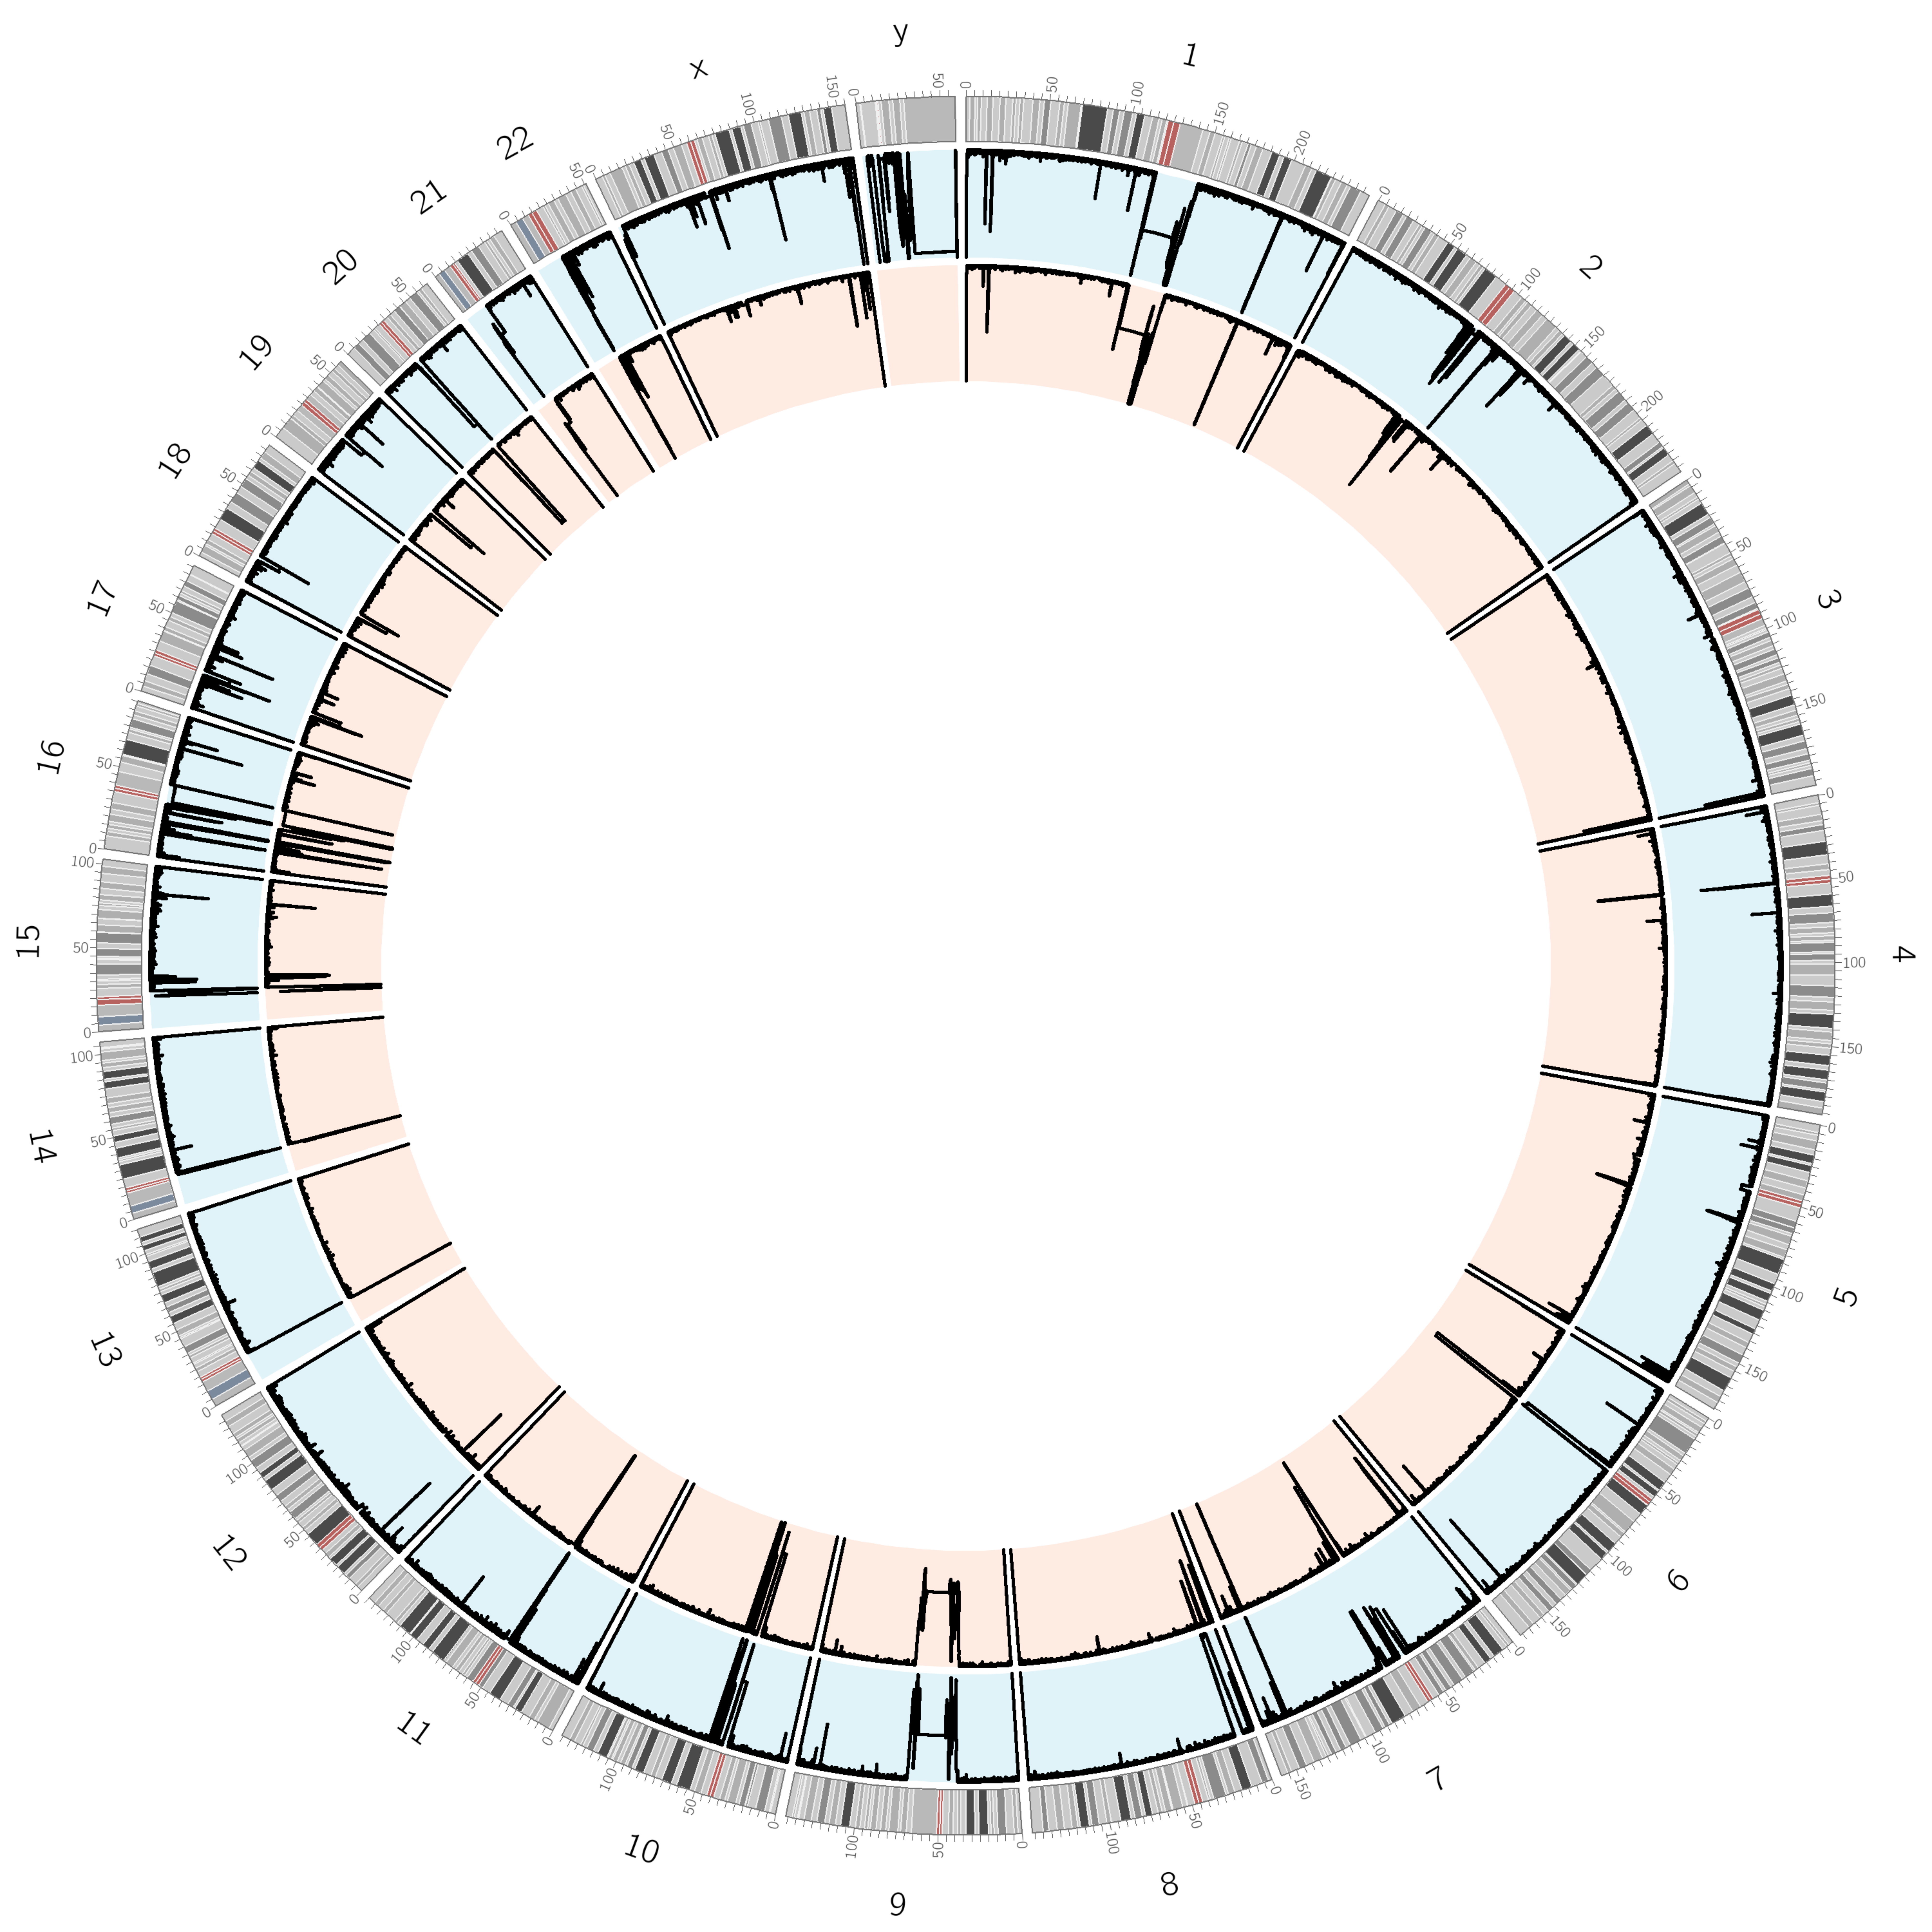



chr1

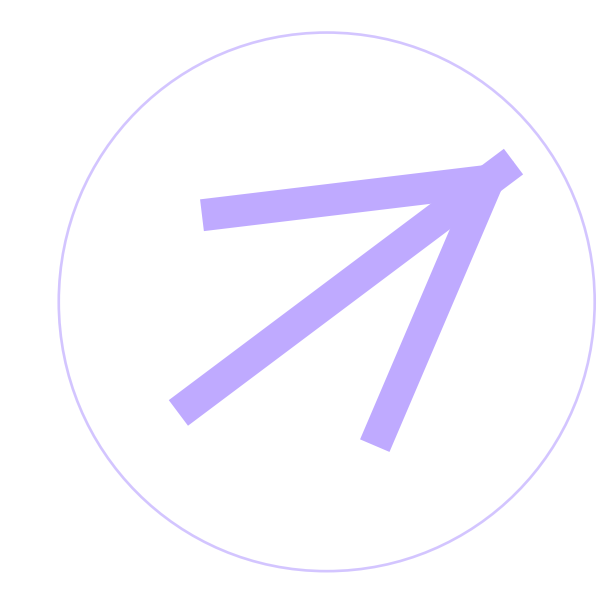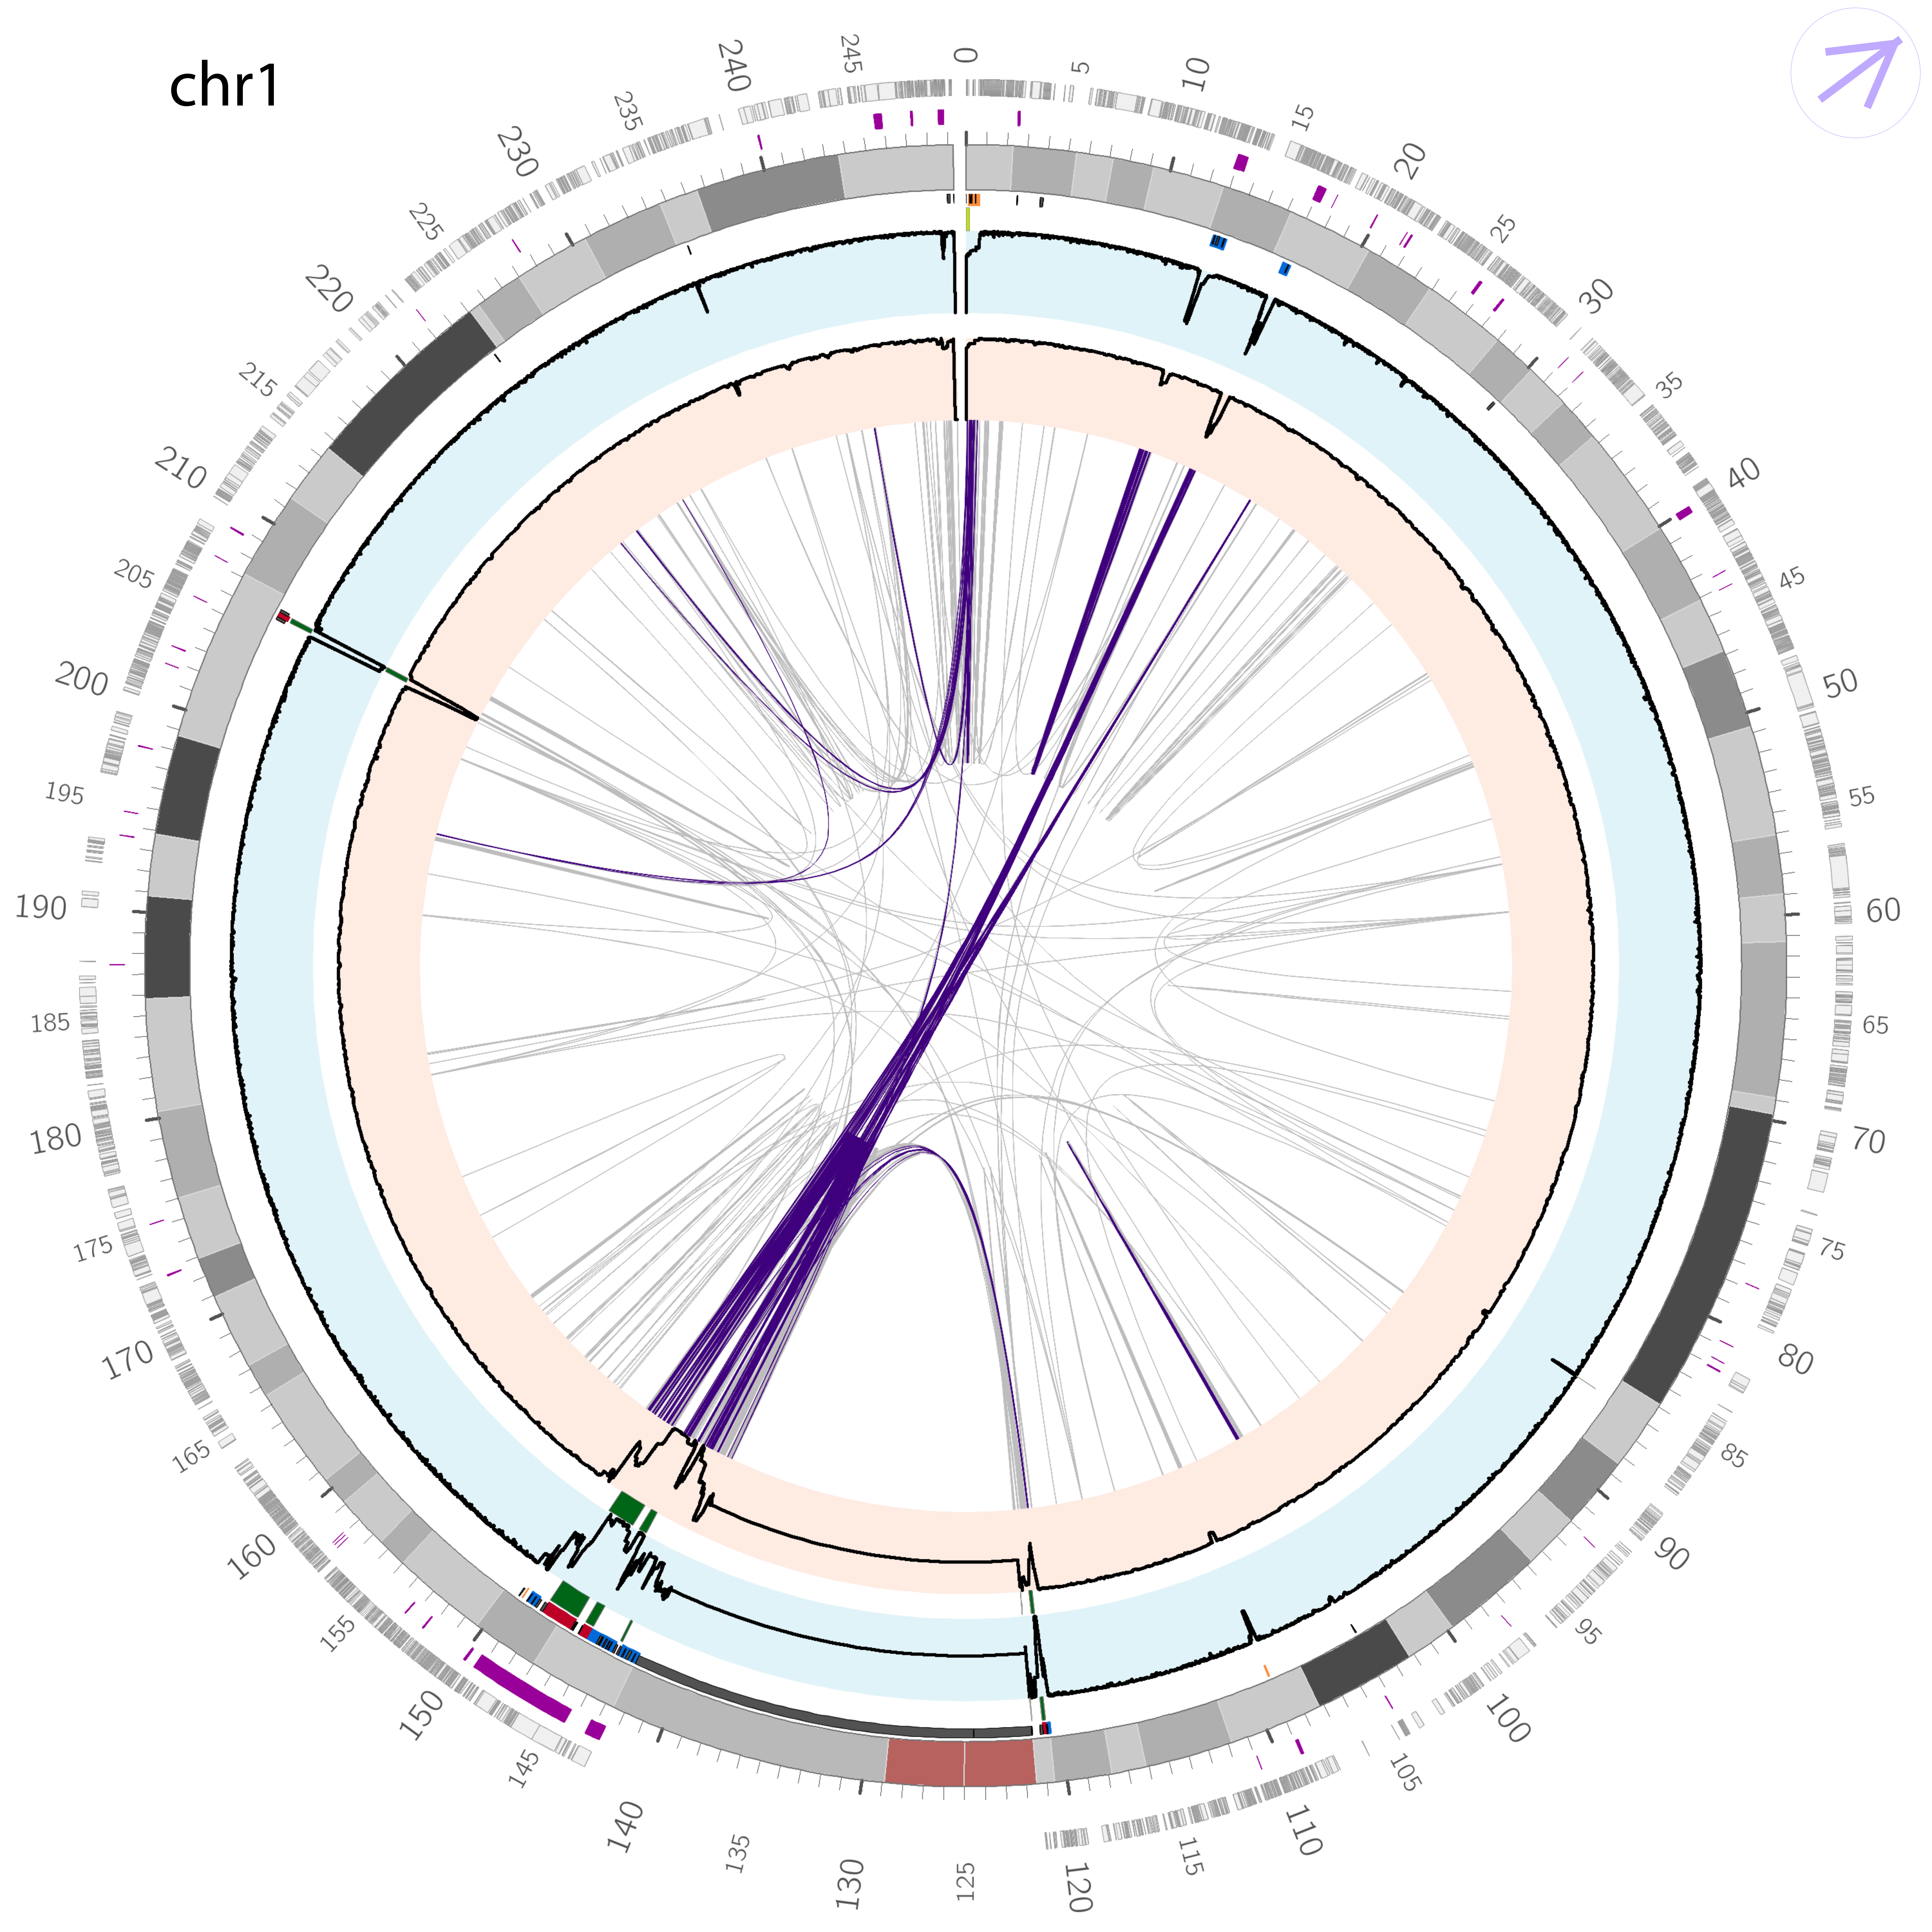



chr2

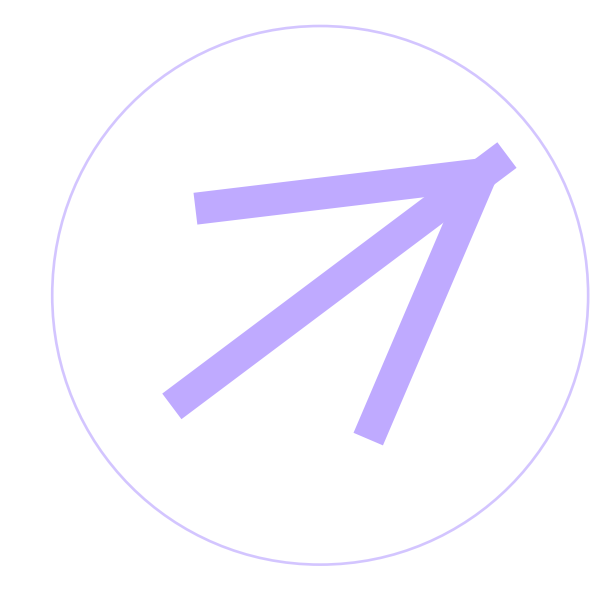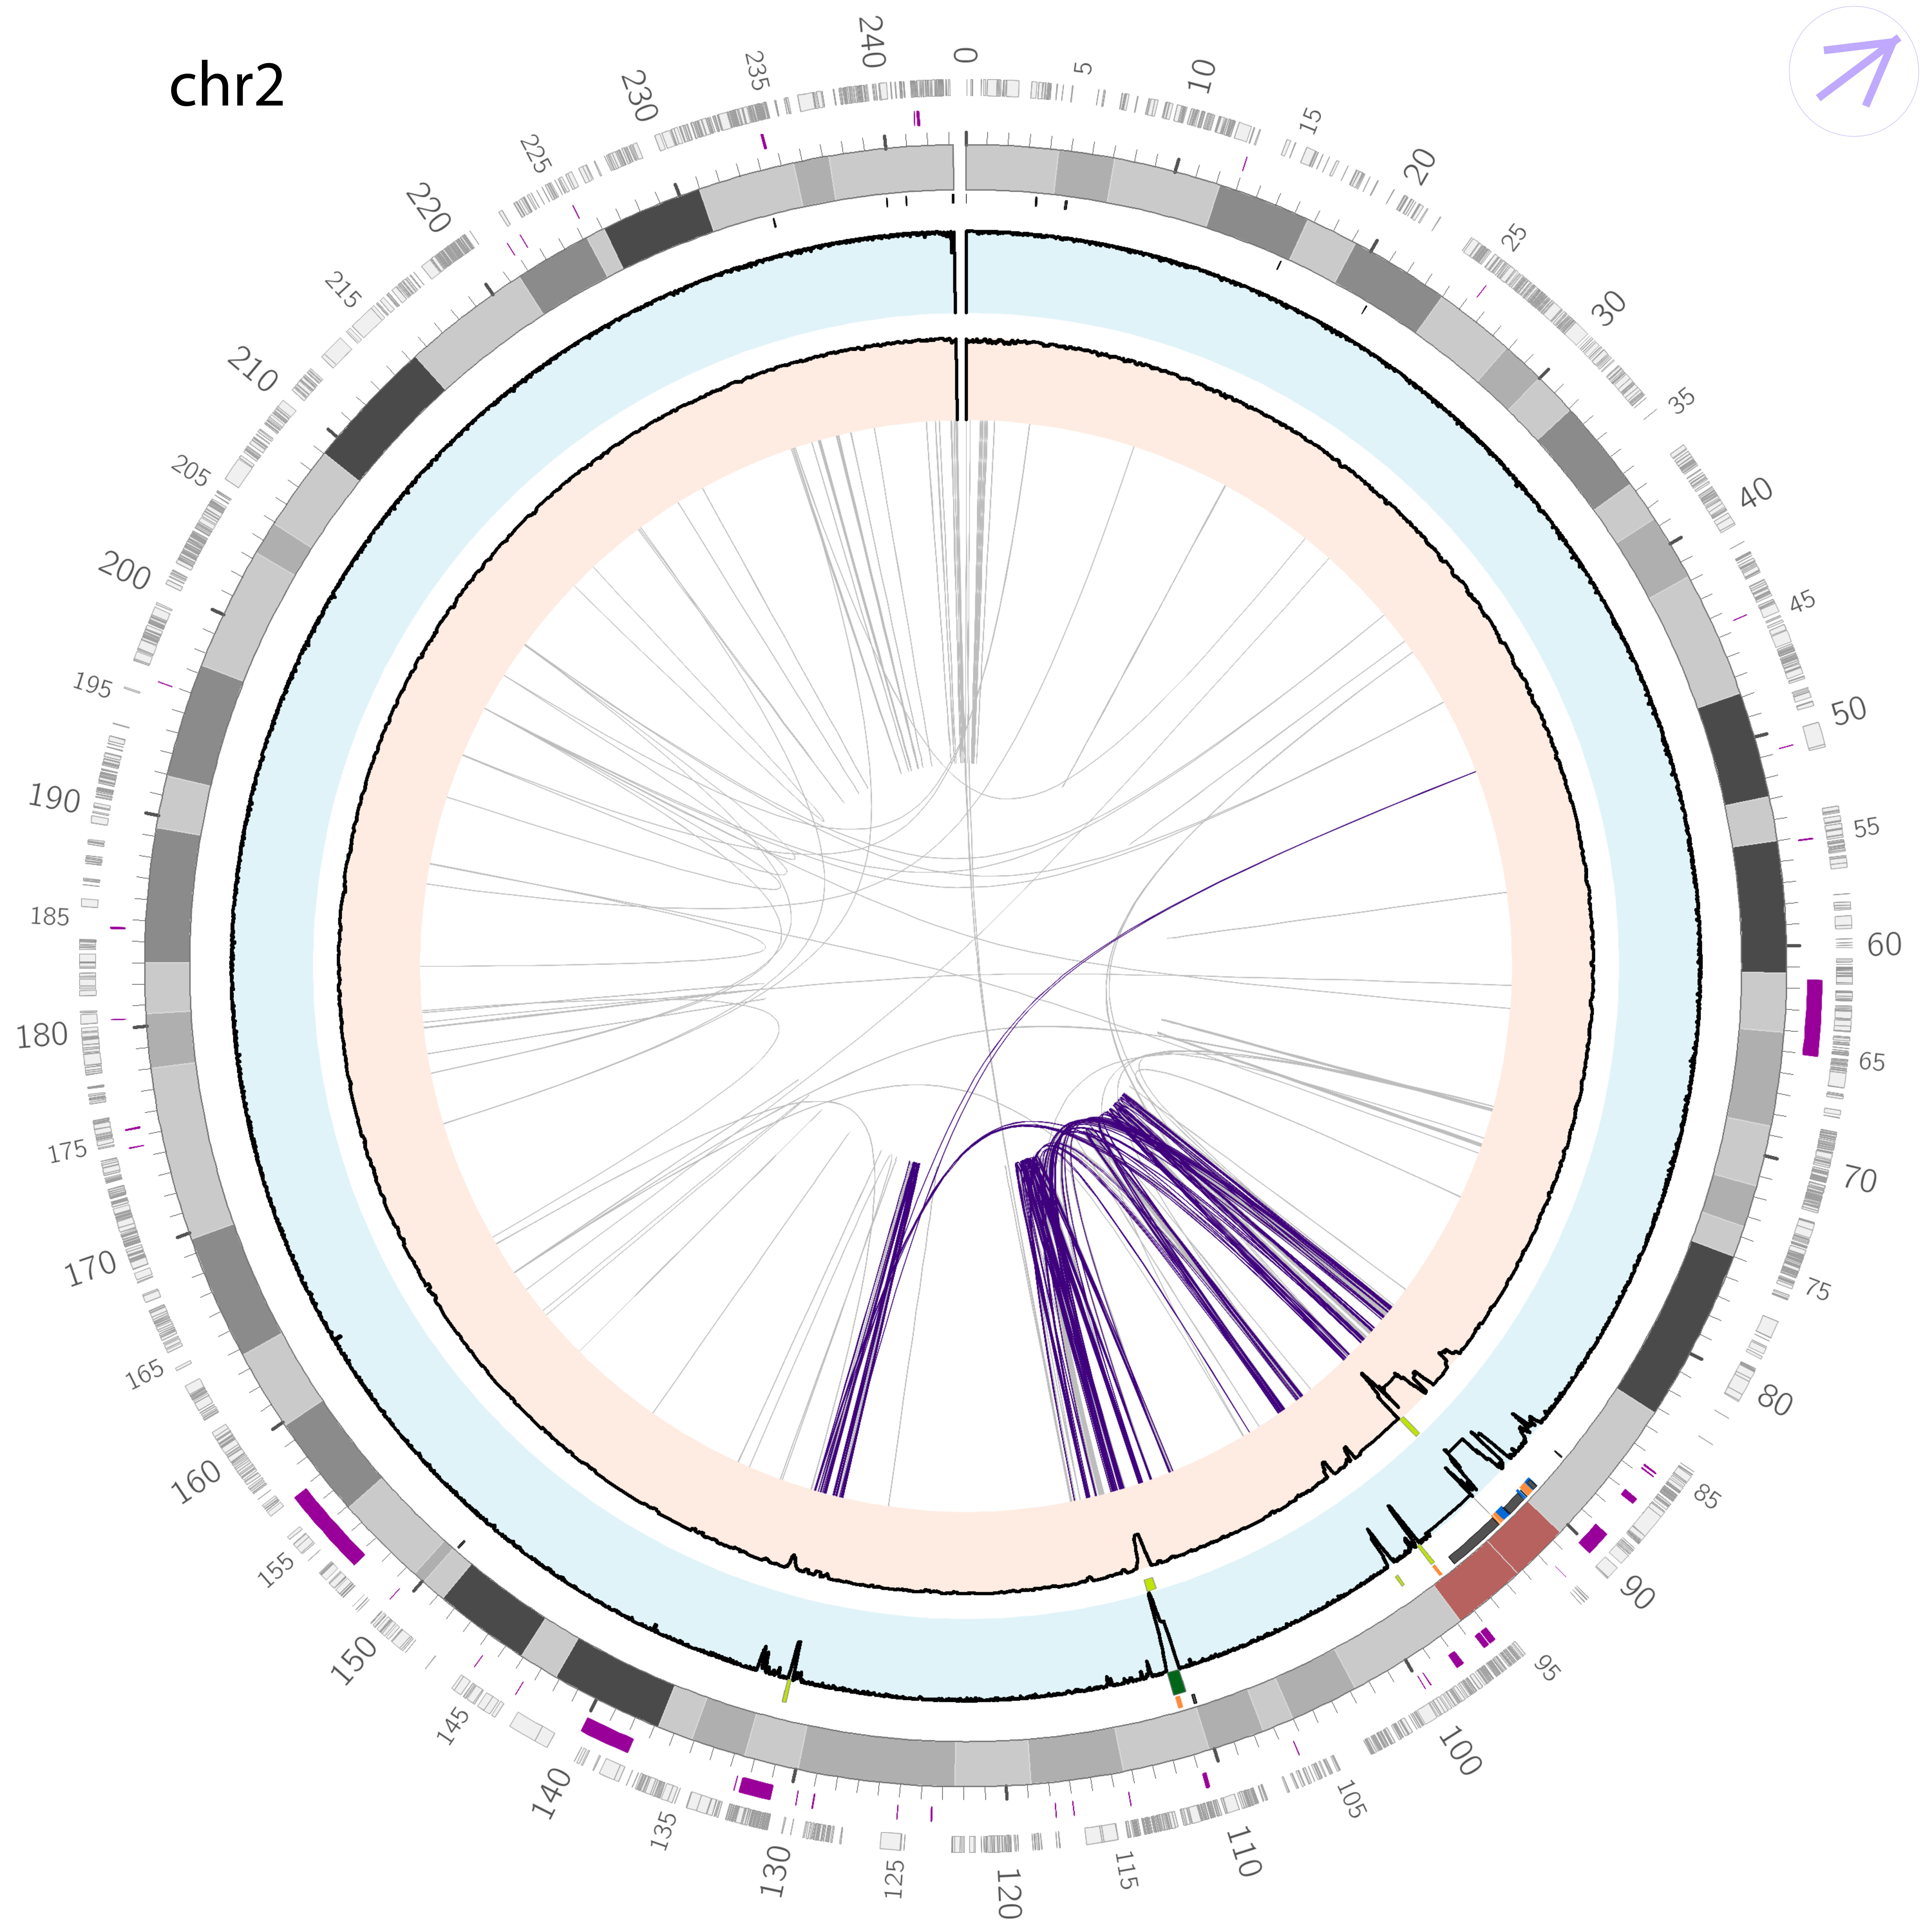



chr3

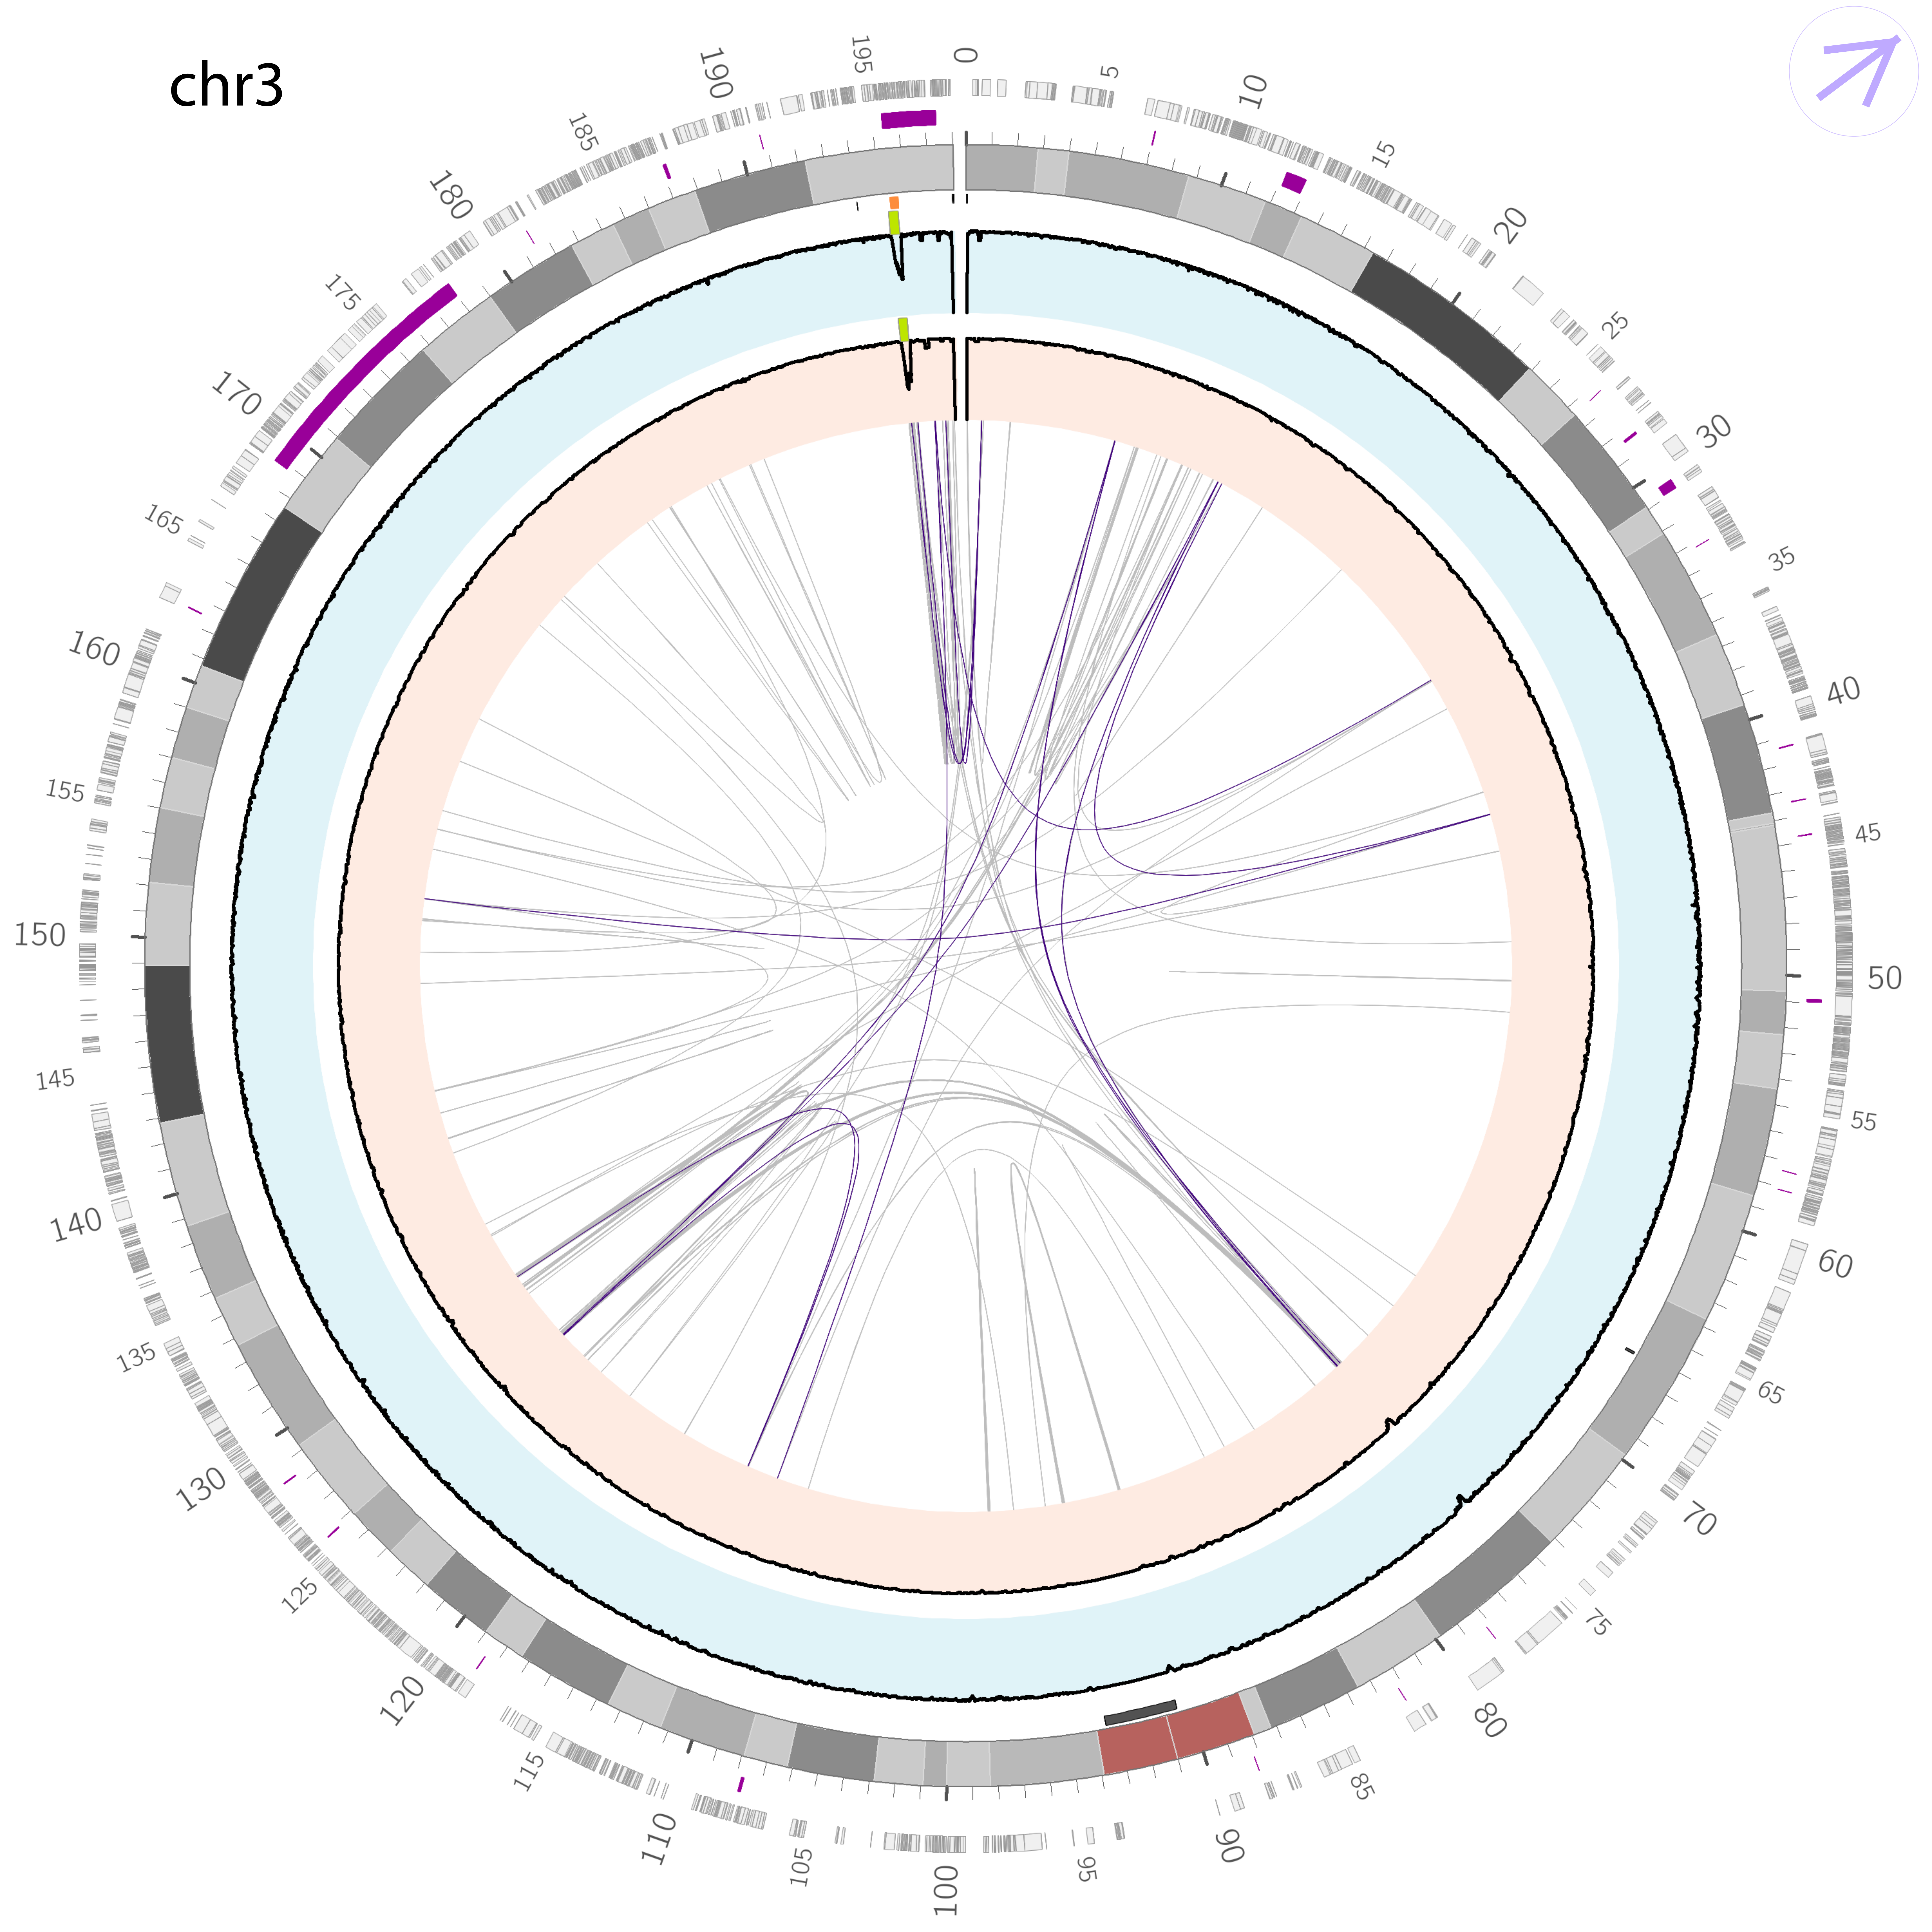



chr4

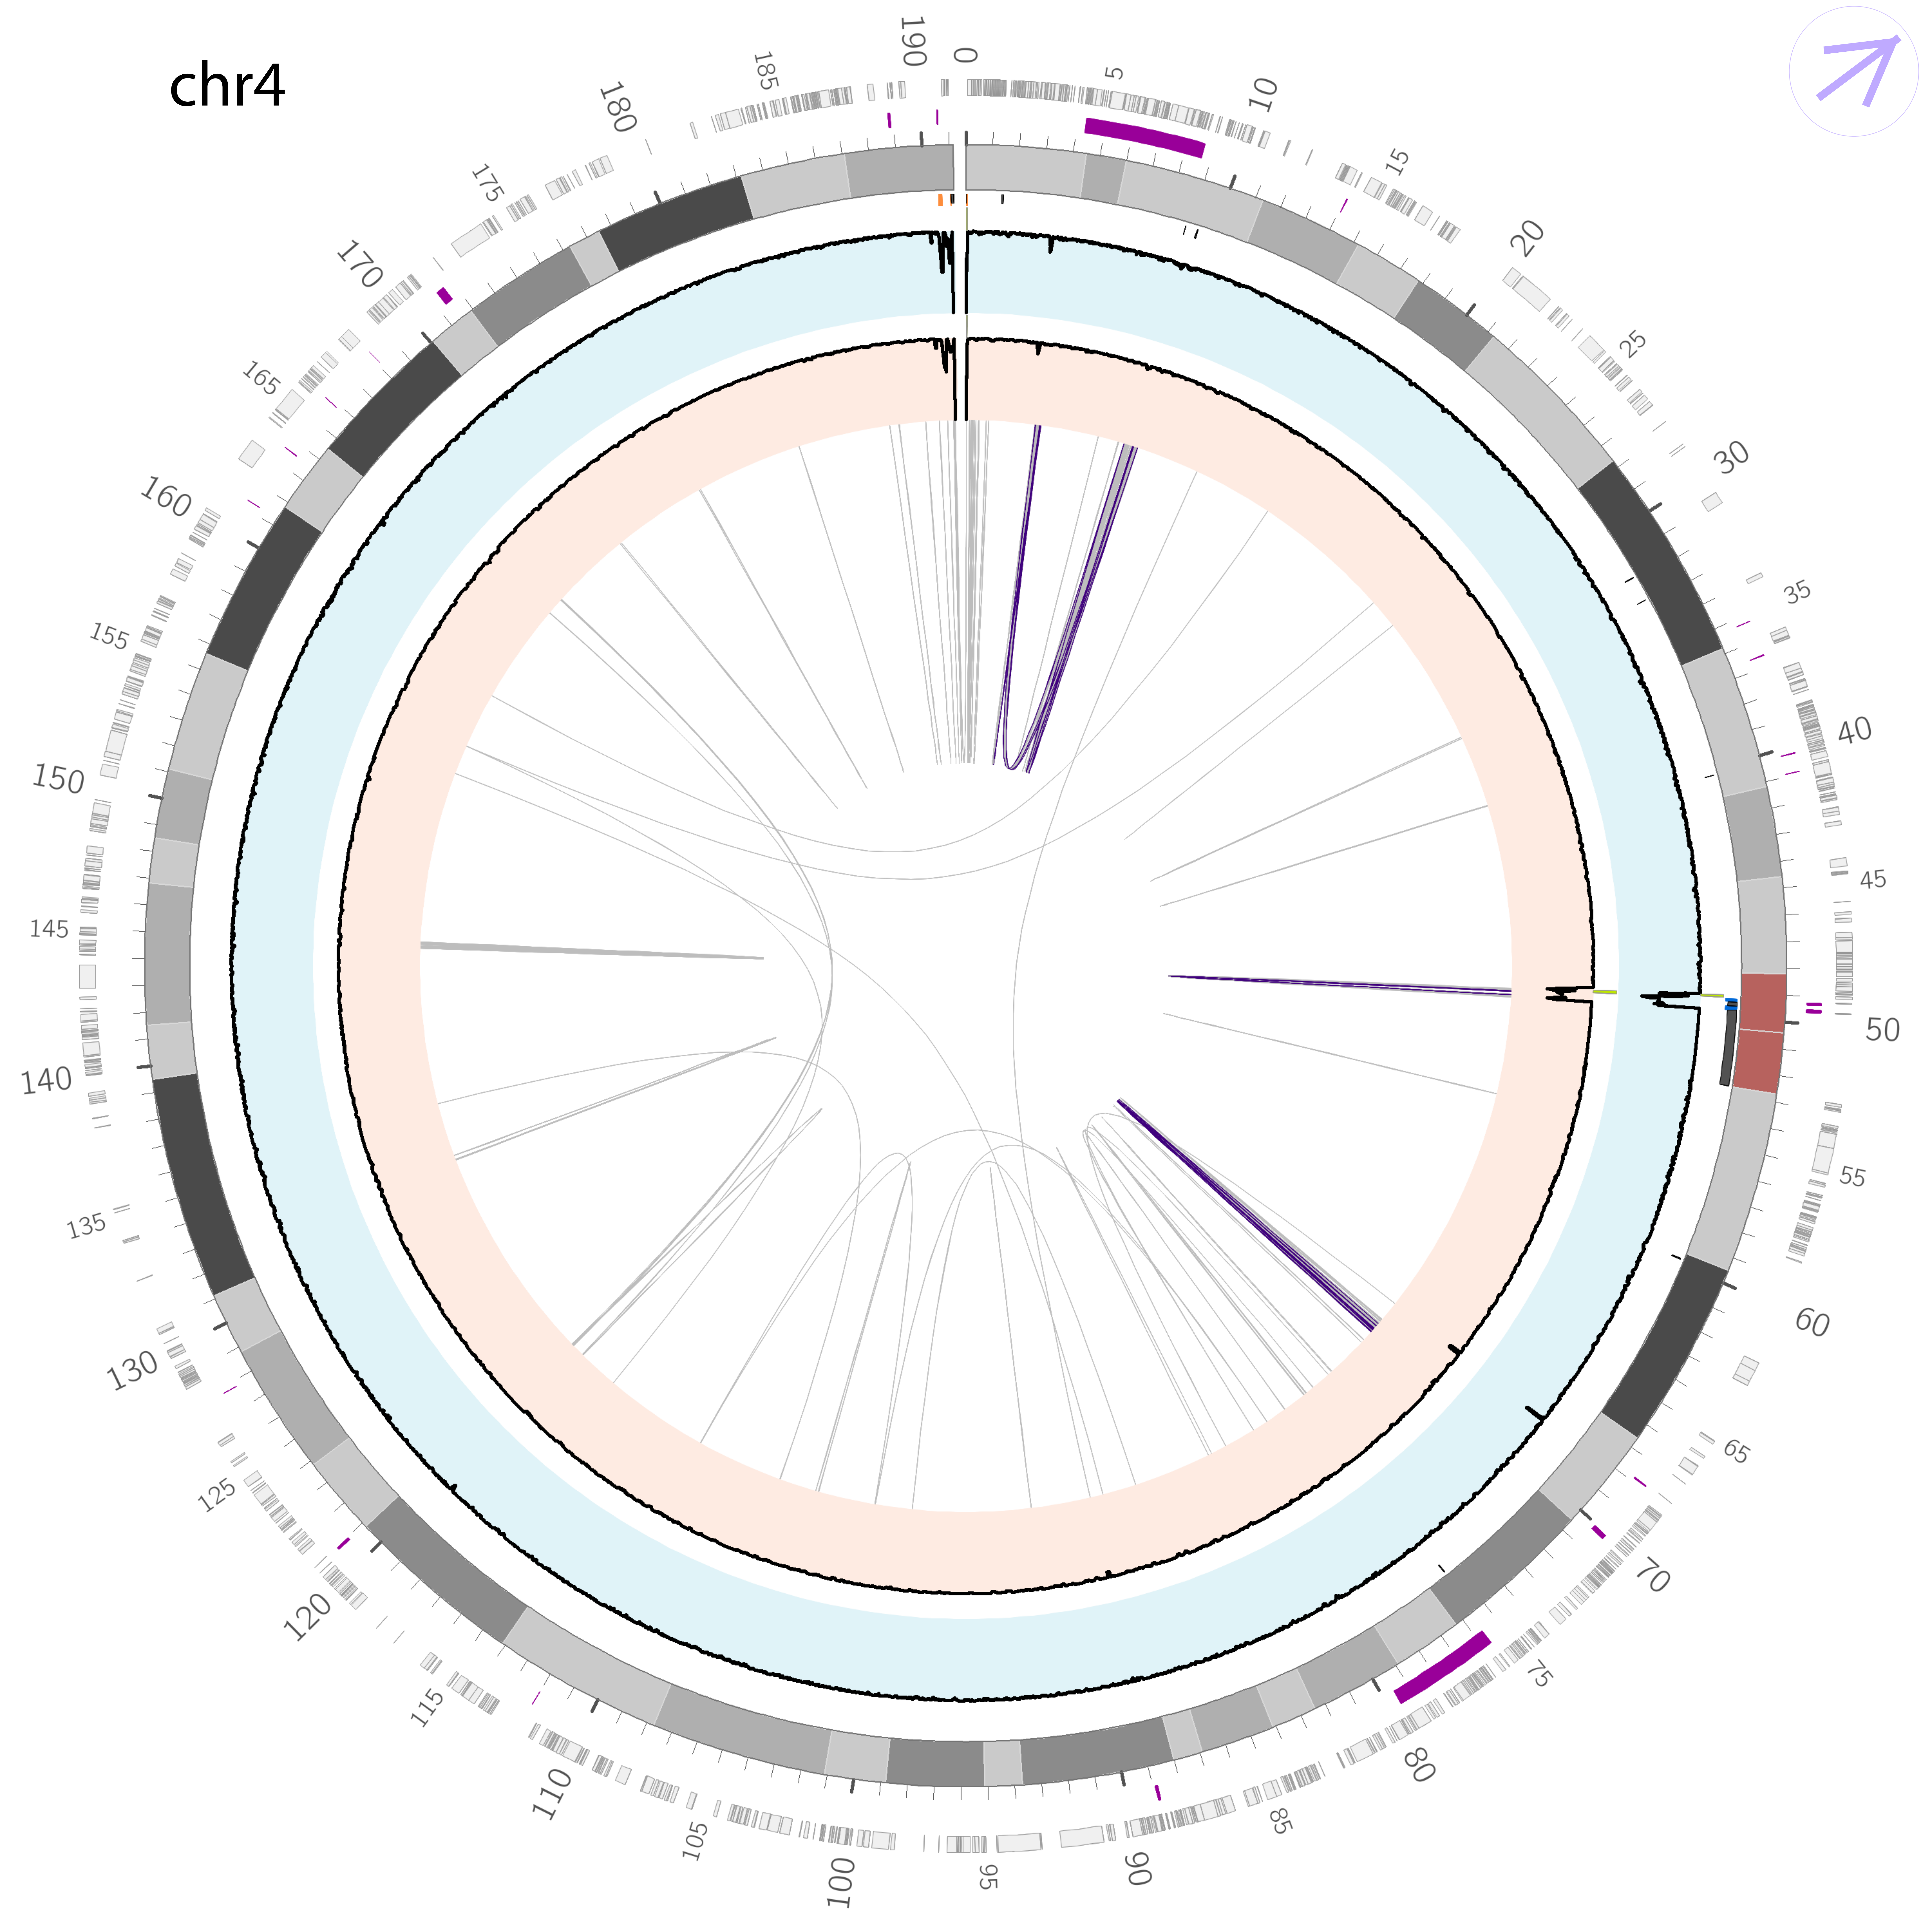



chr5

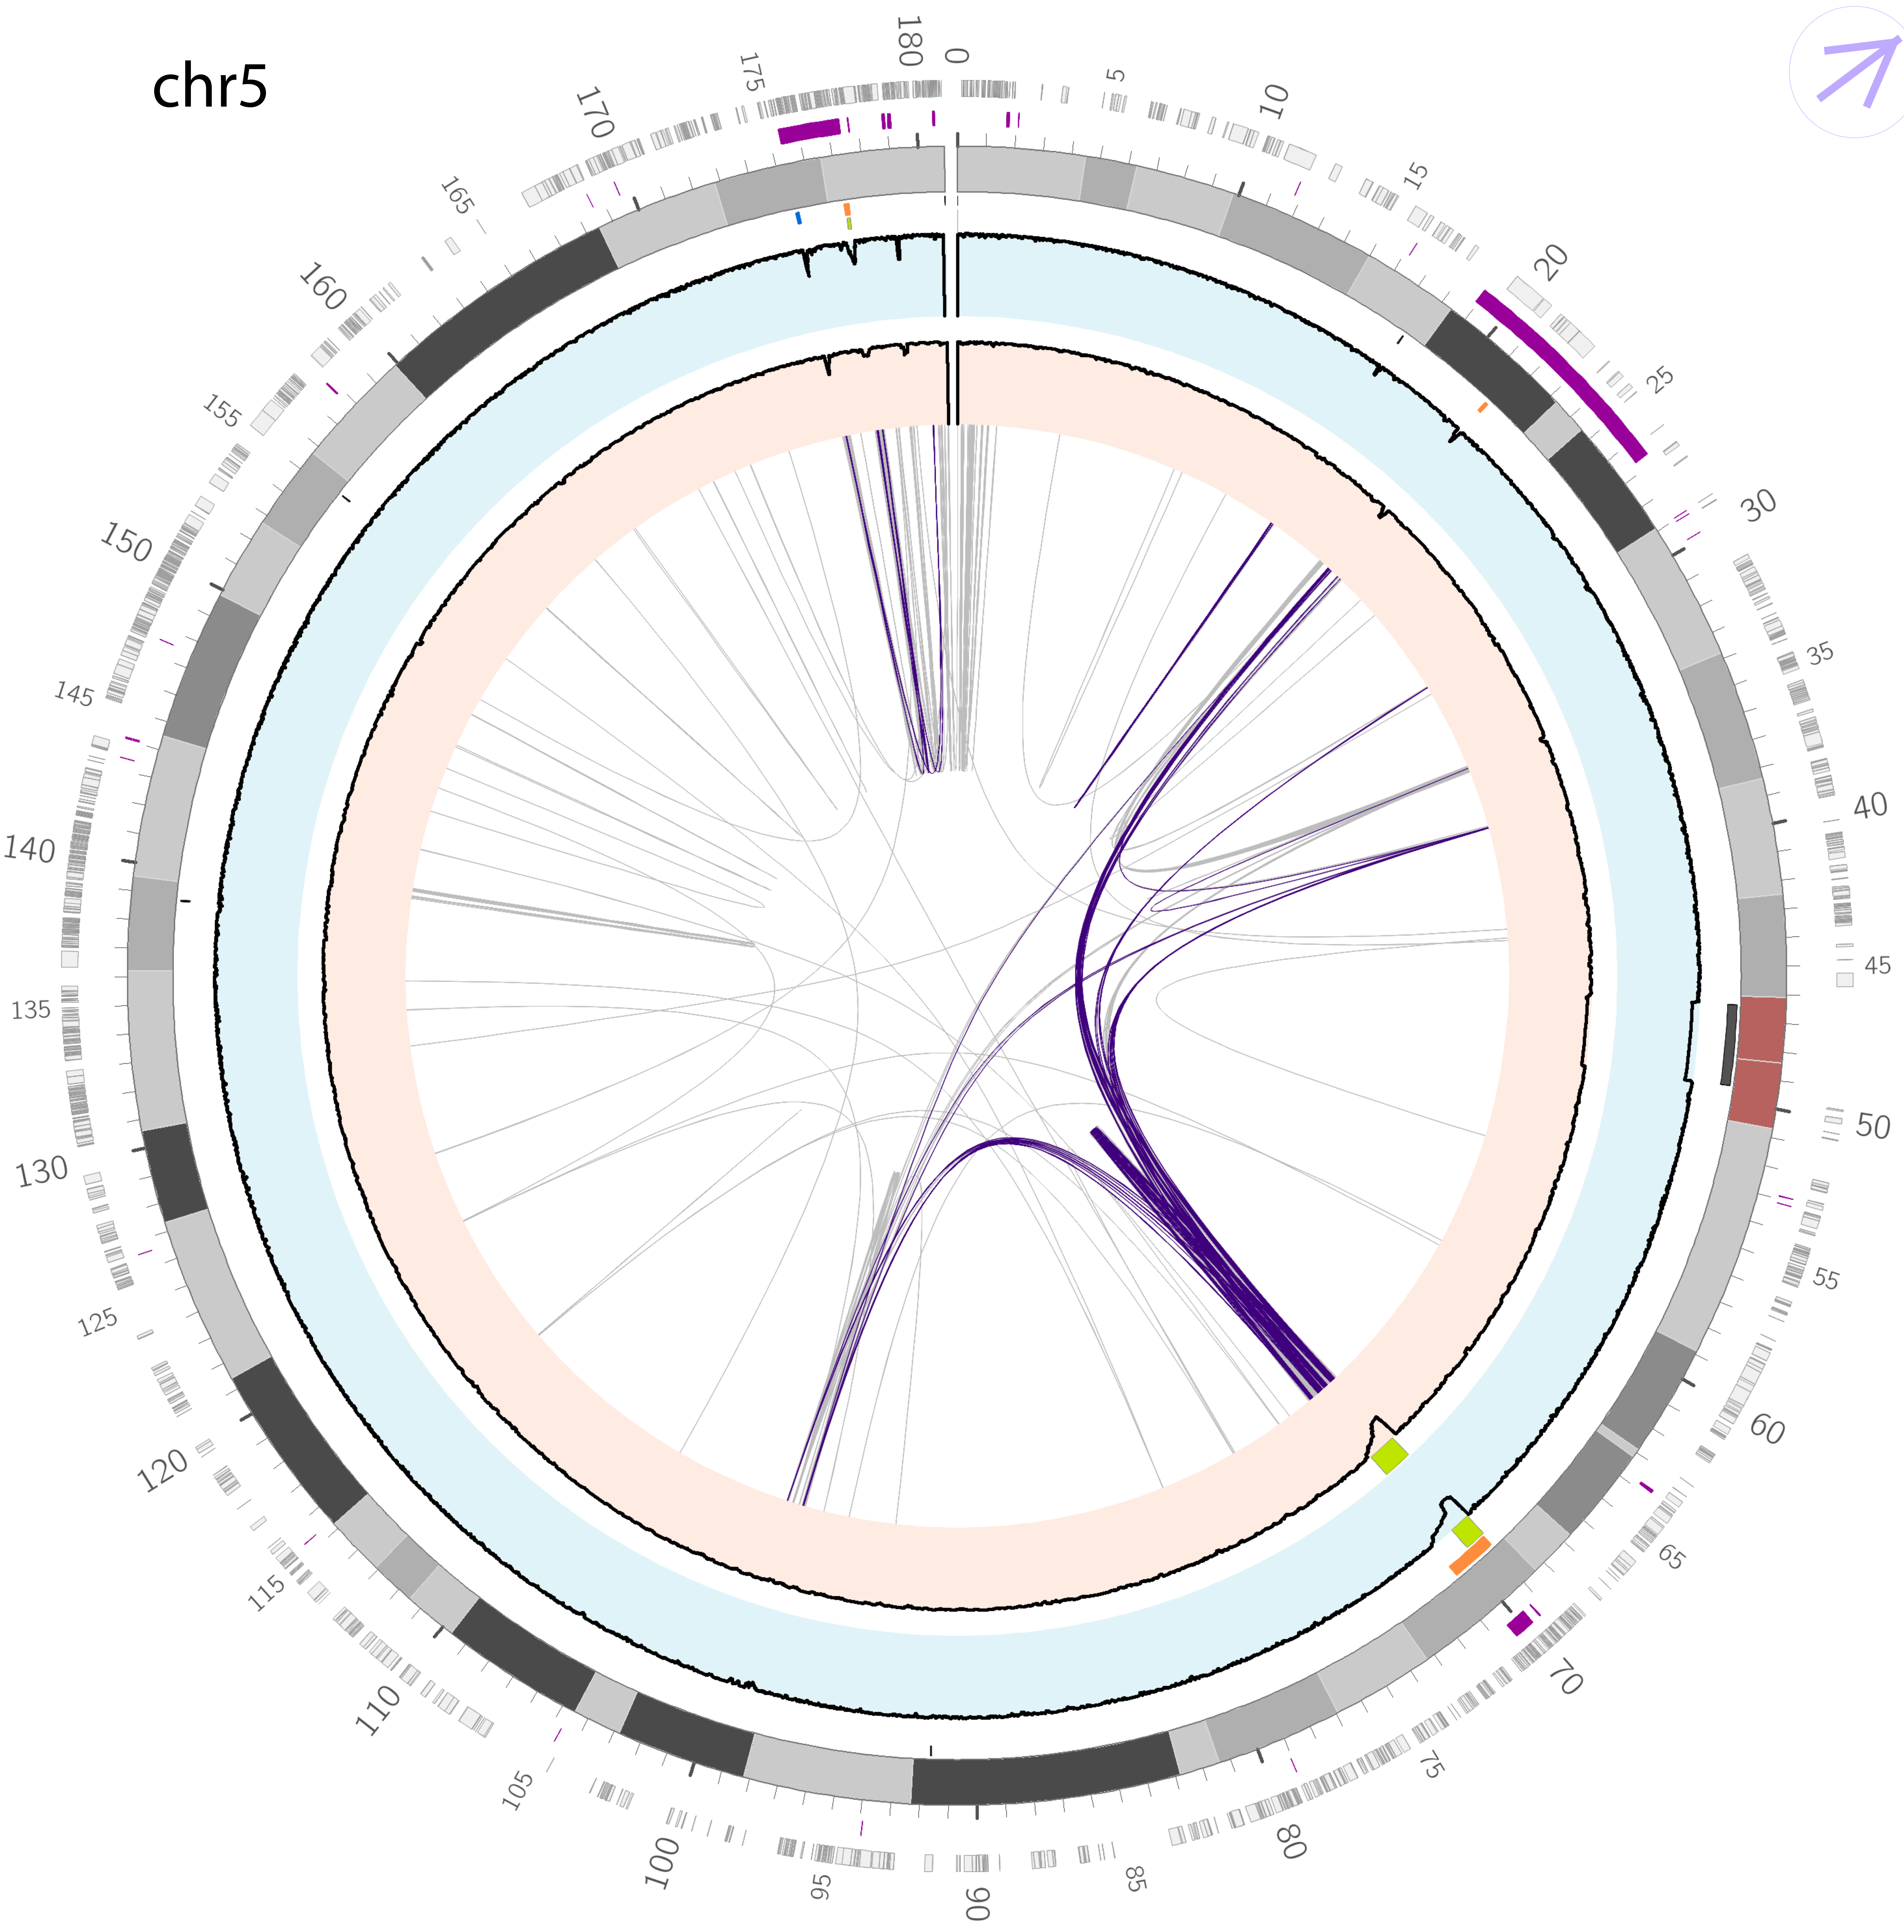



chr6

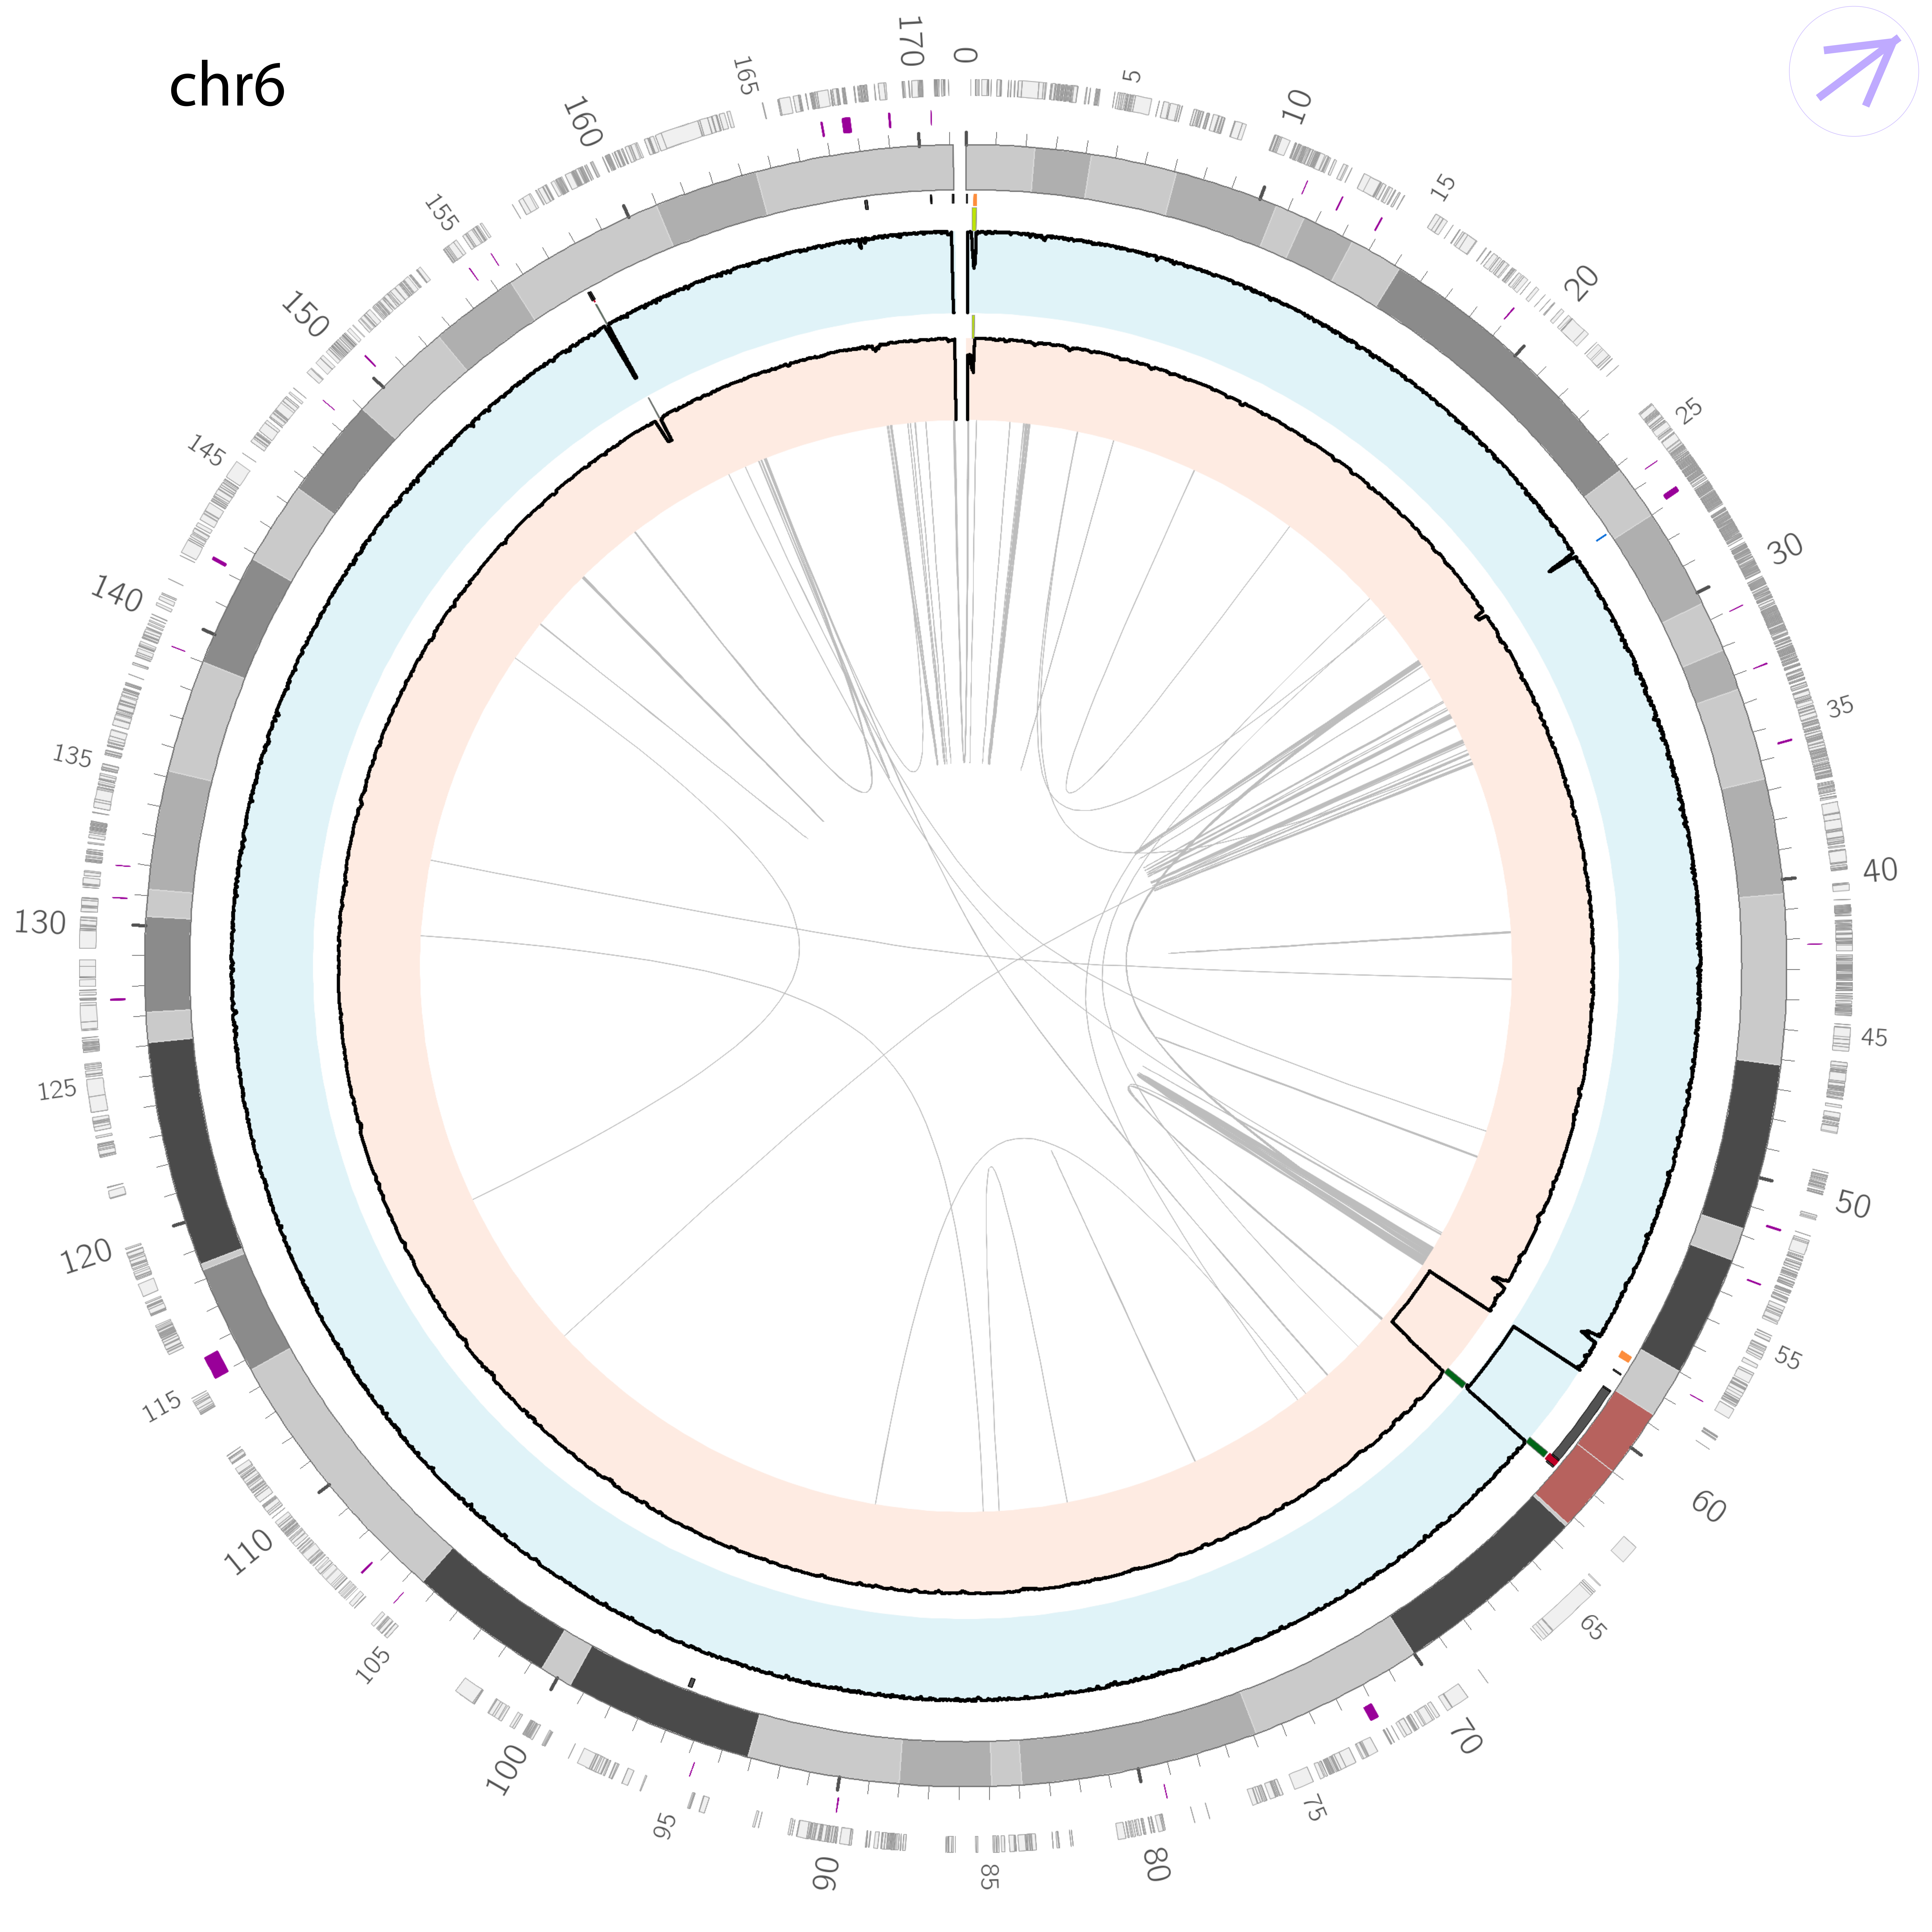



chr7

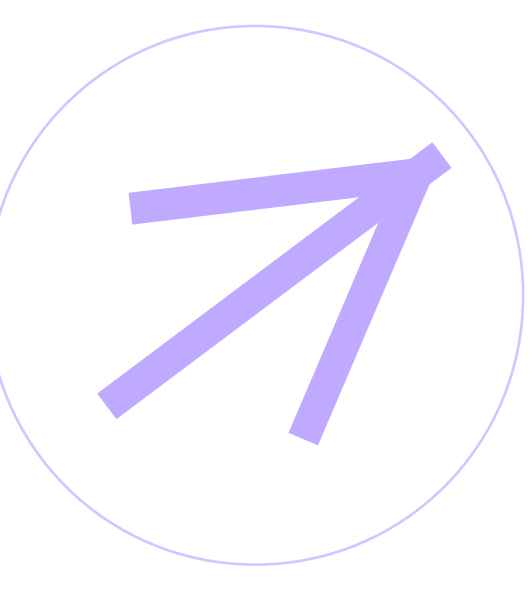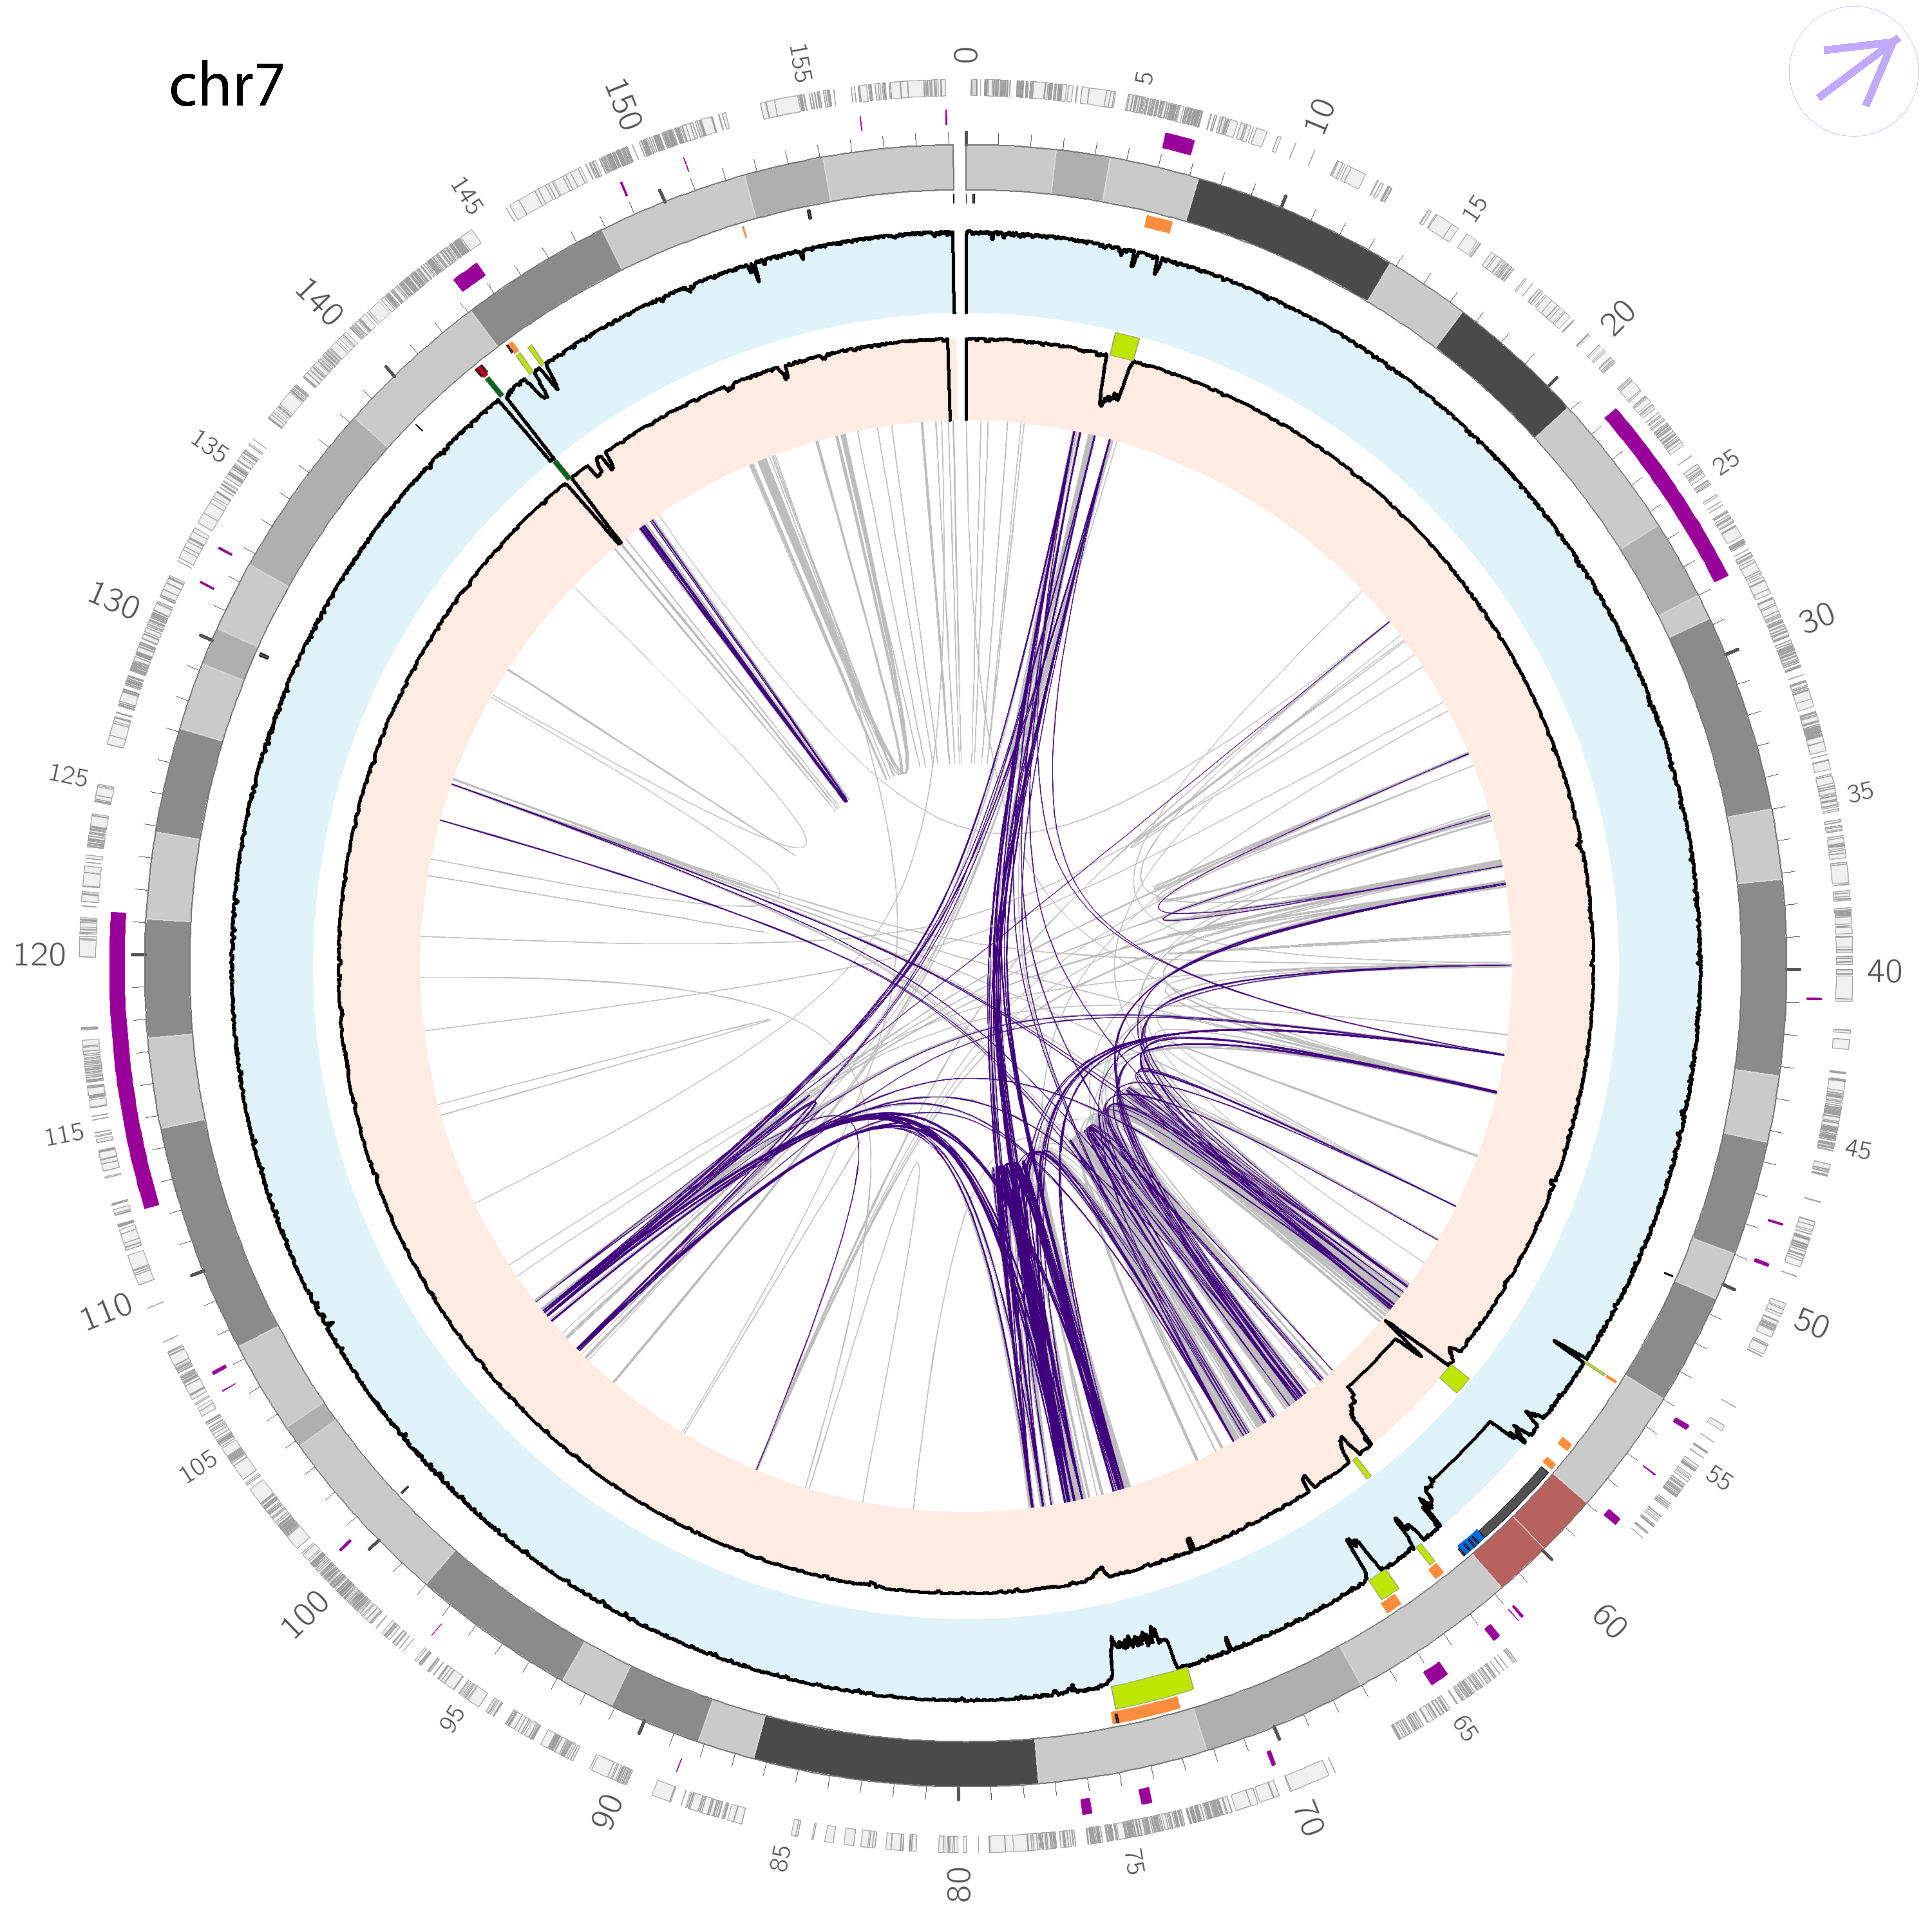







chr9

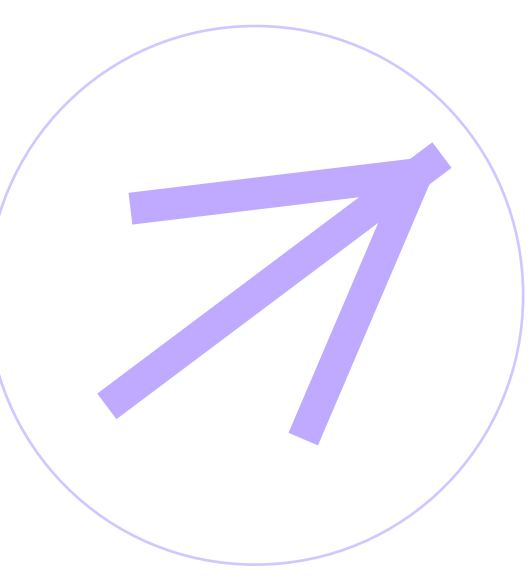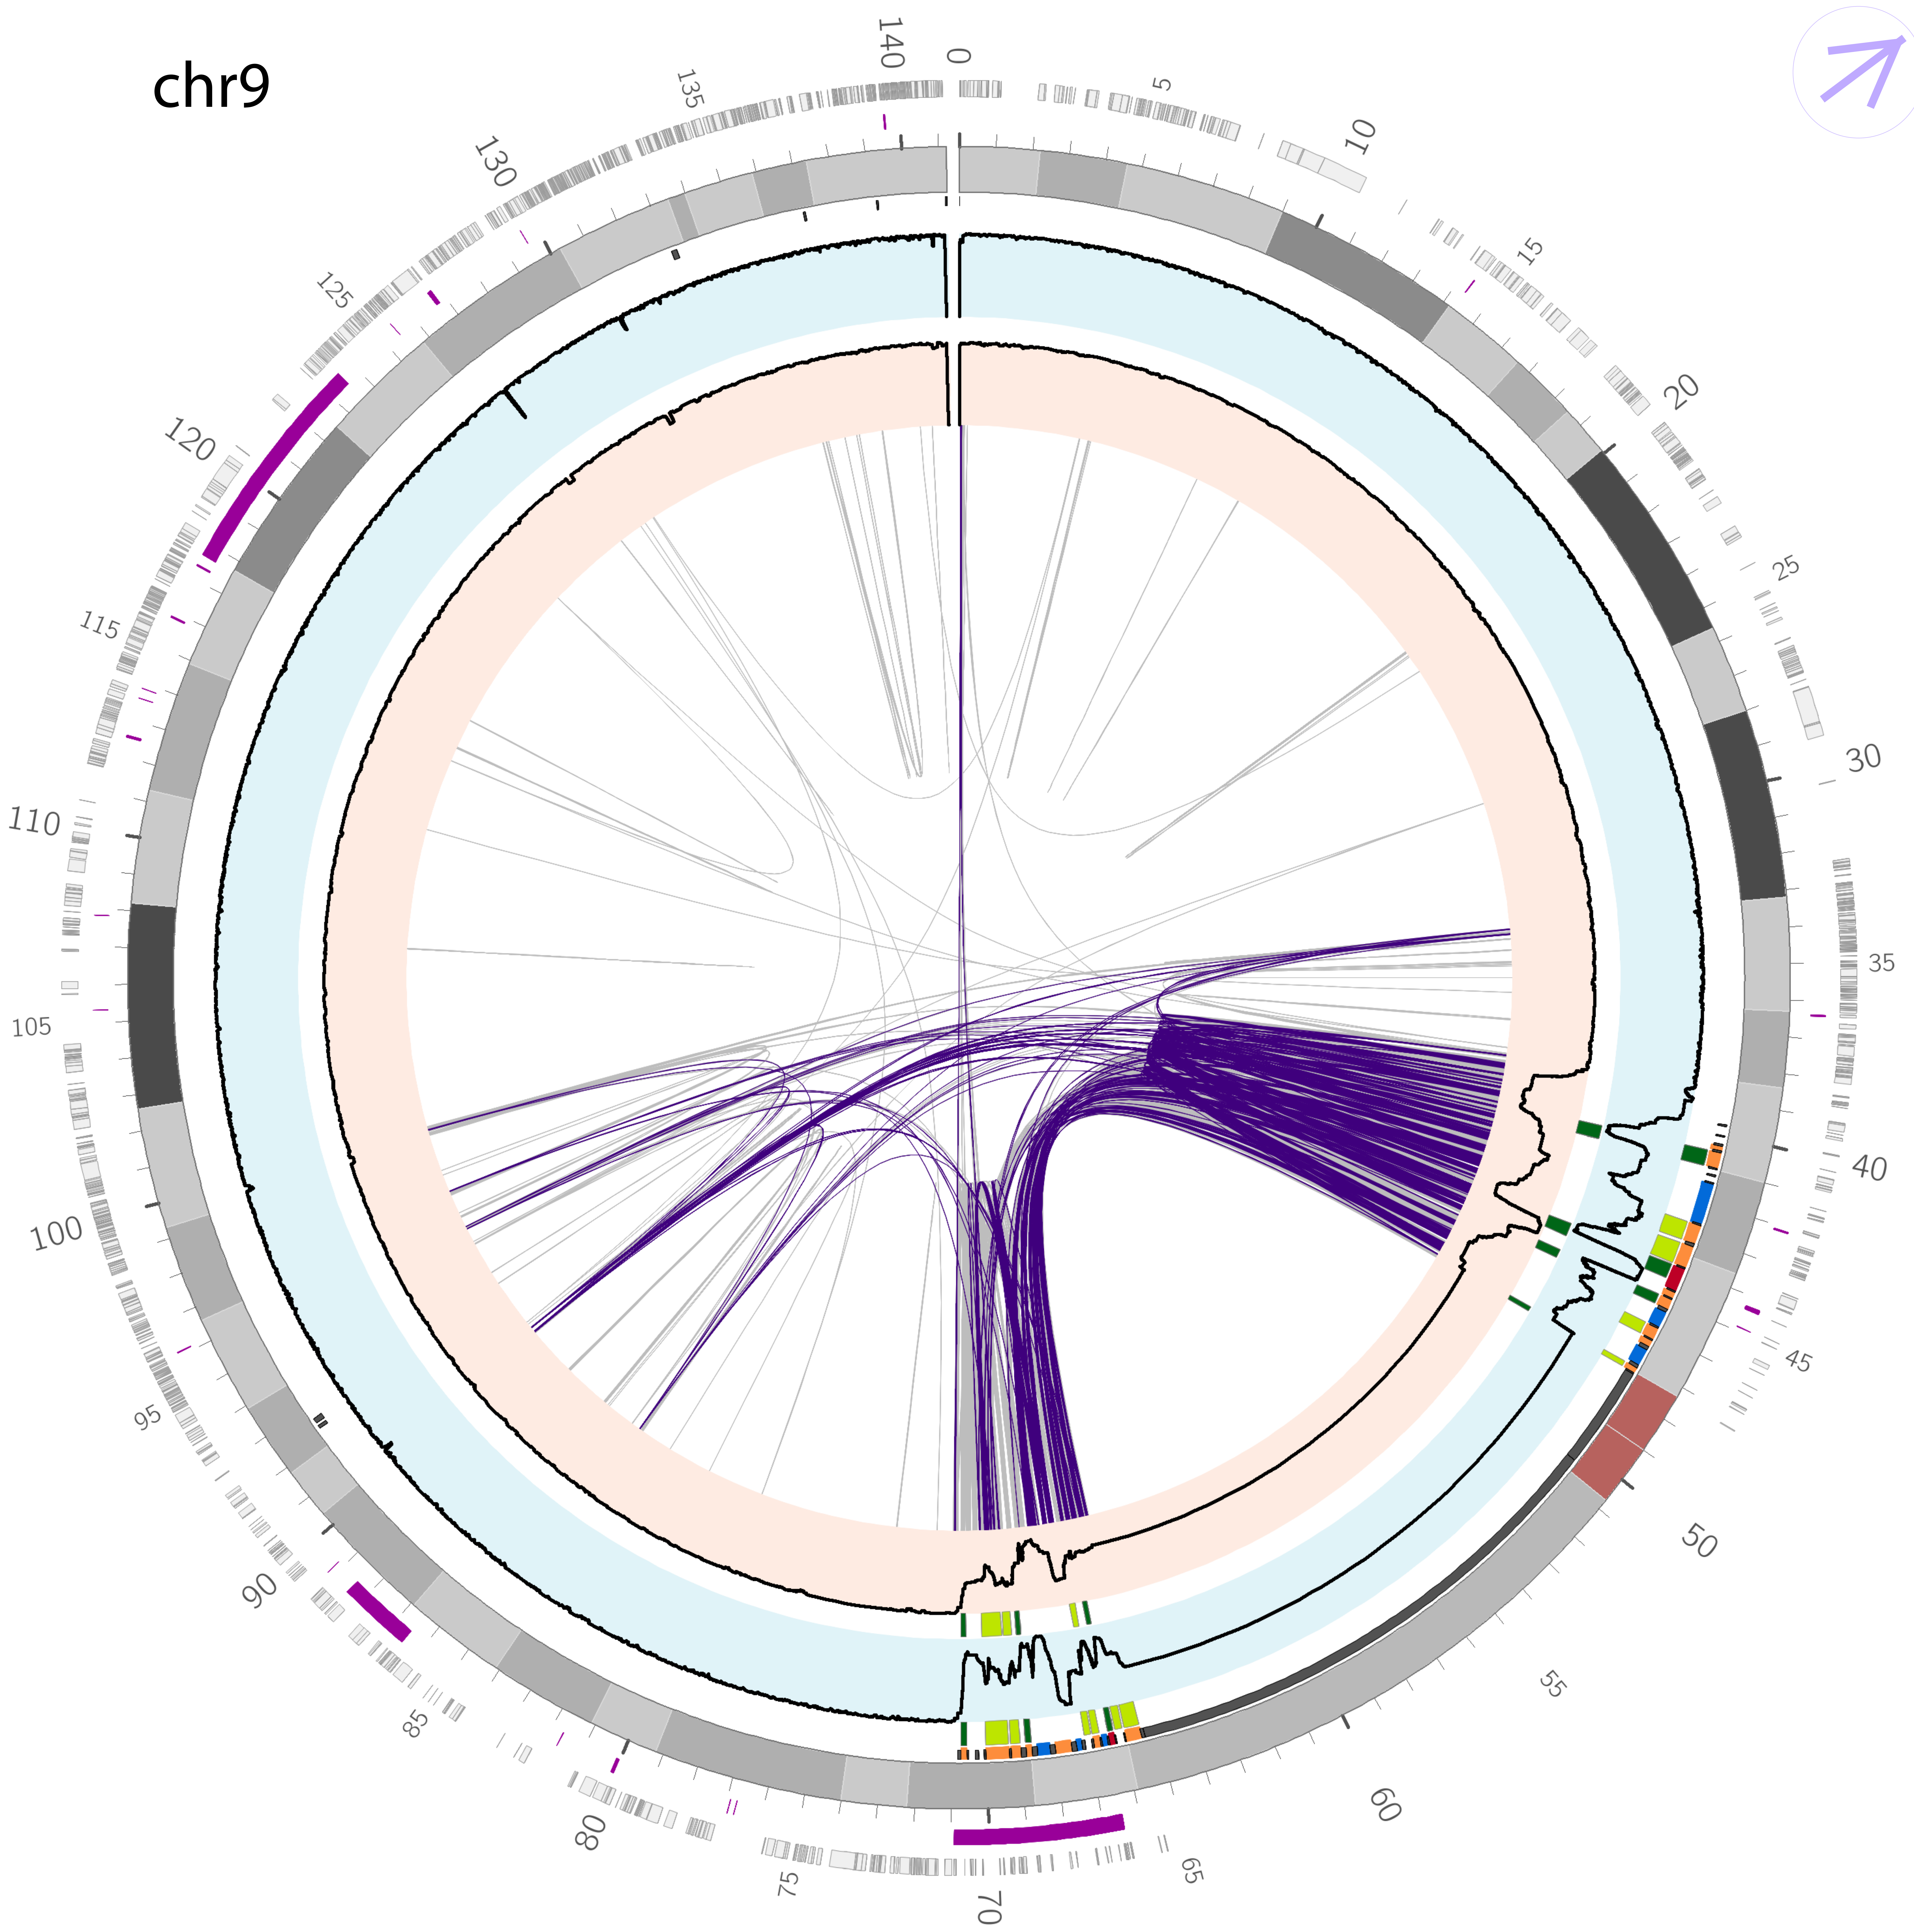



chr10

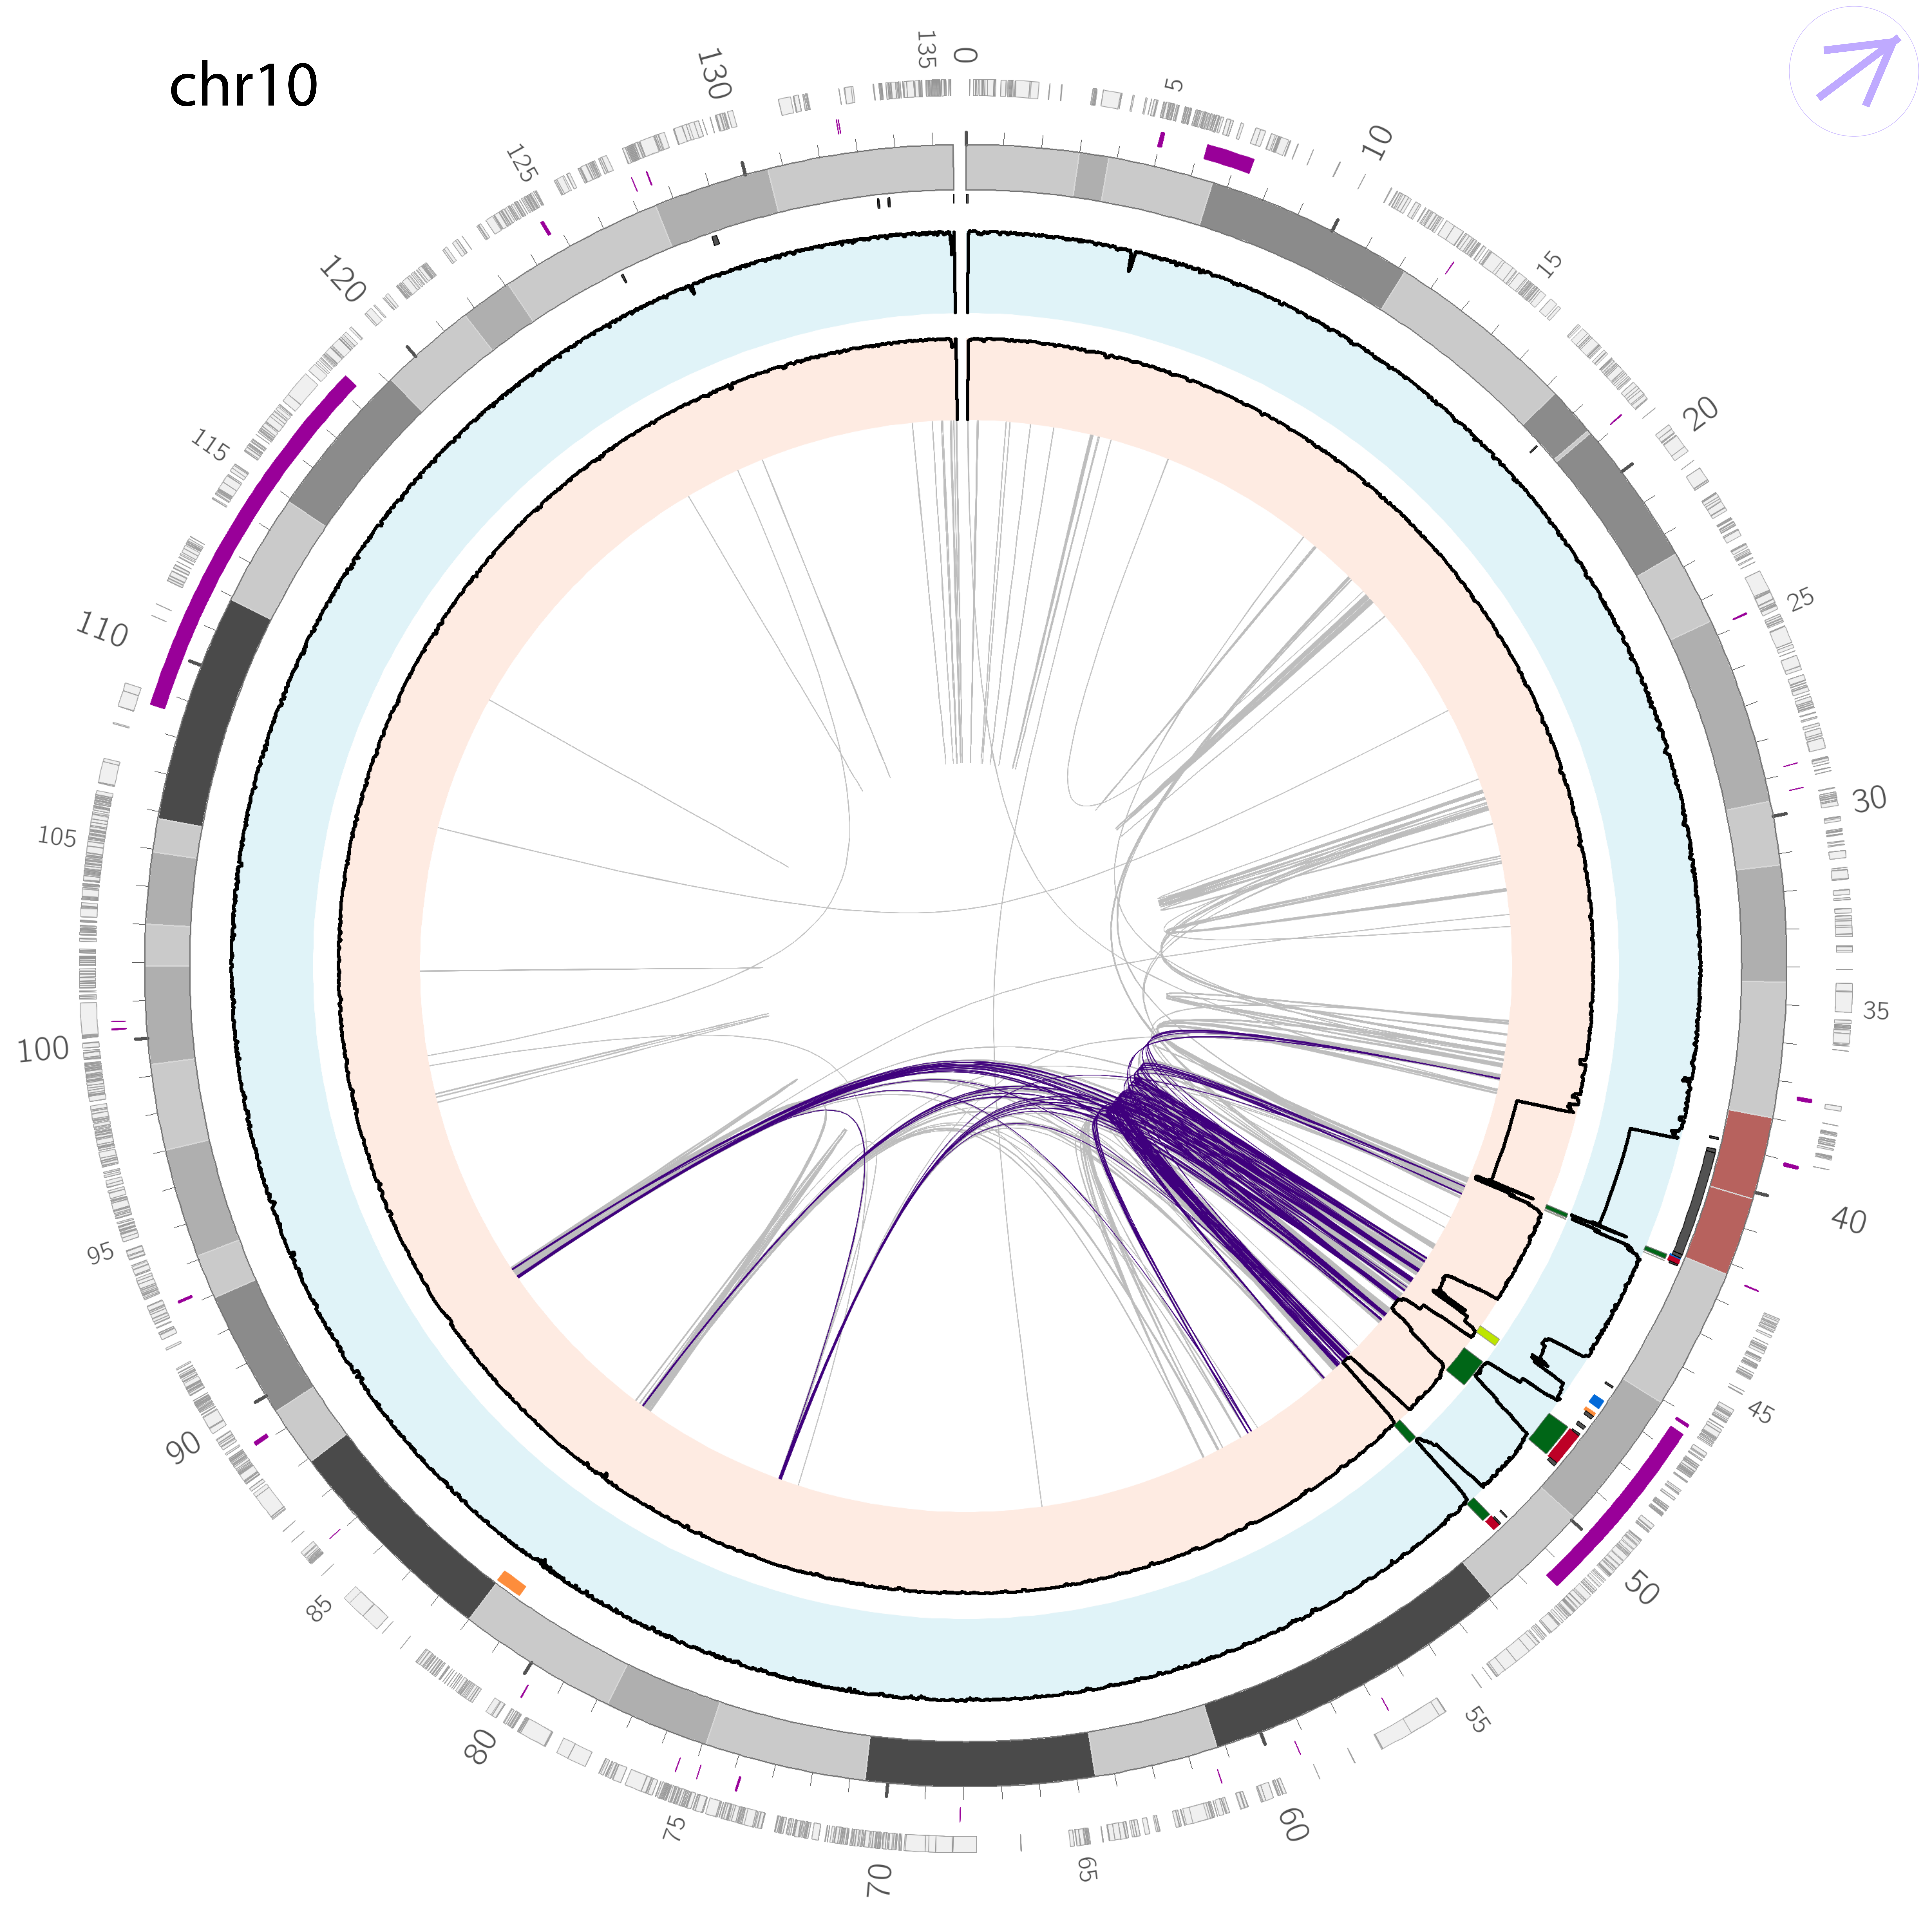



chr11

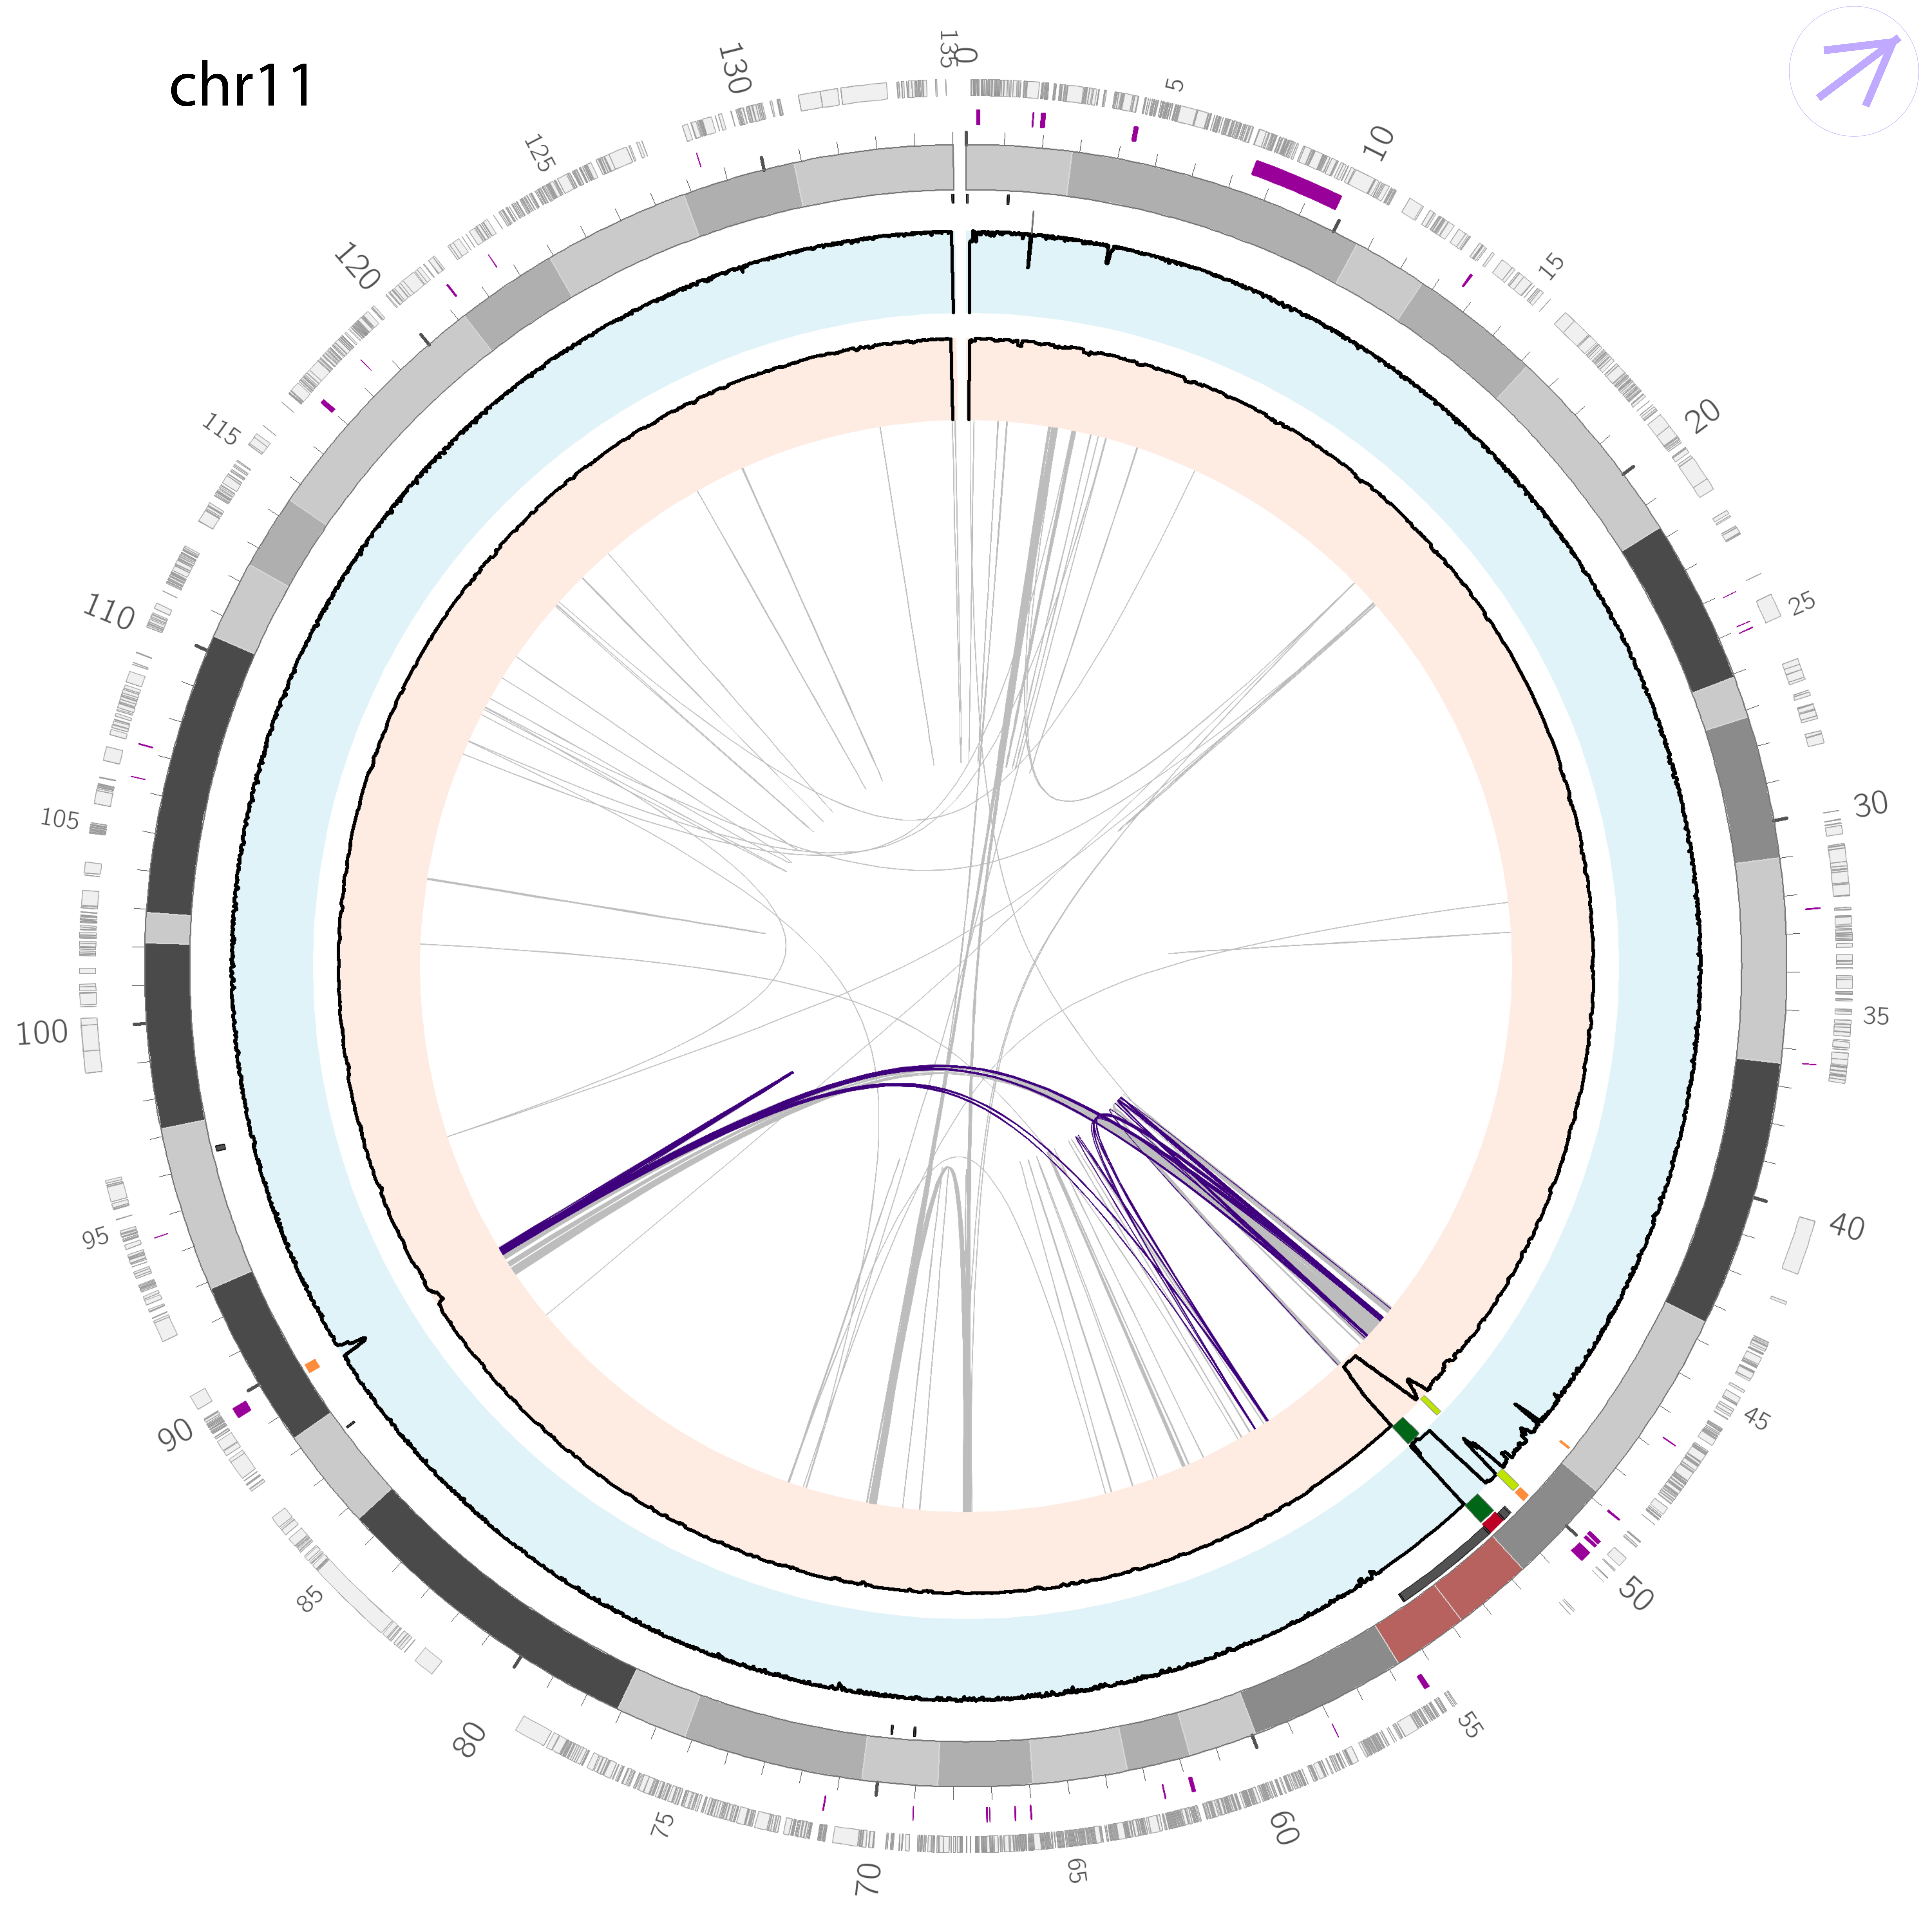



chr12

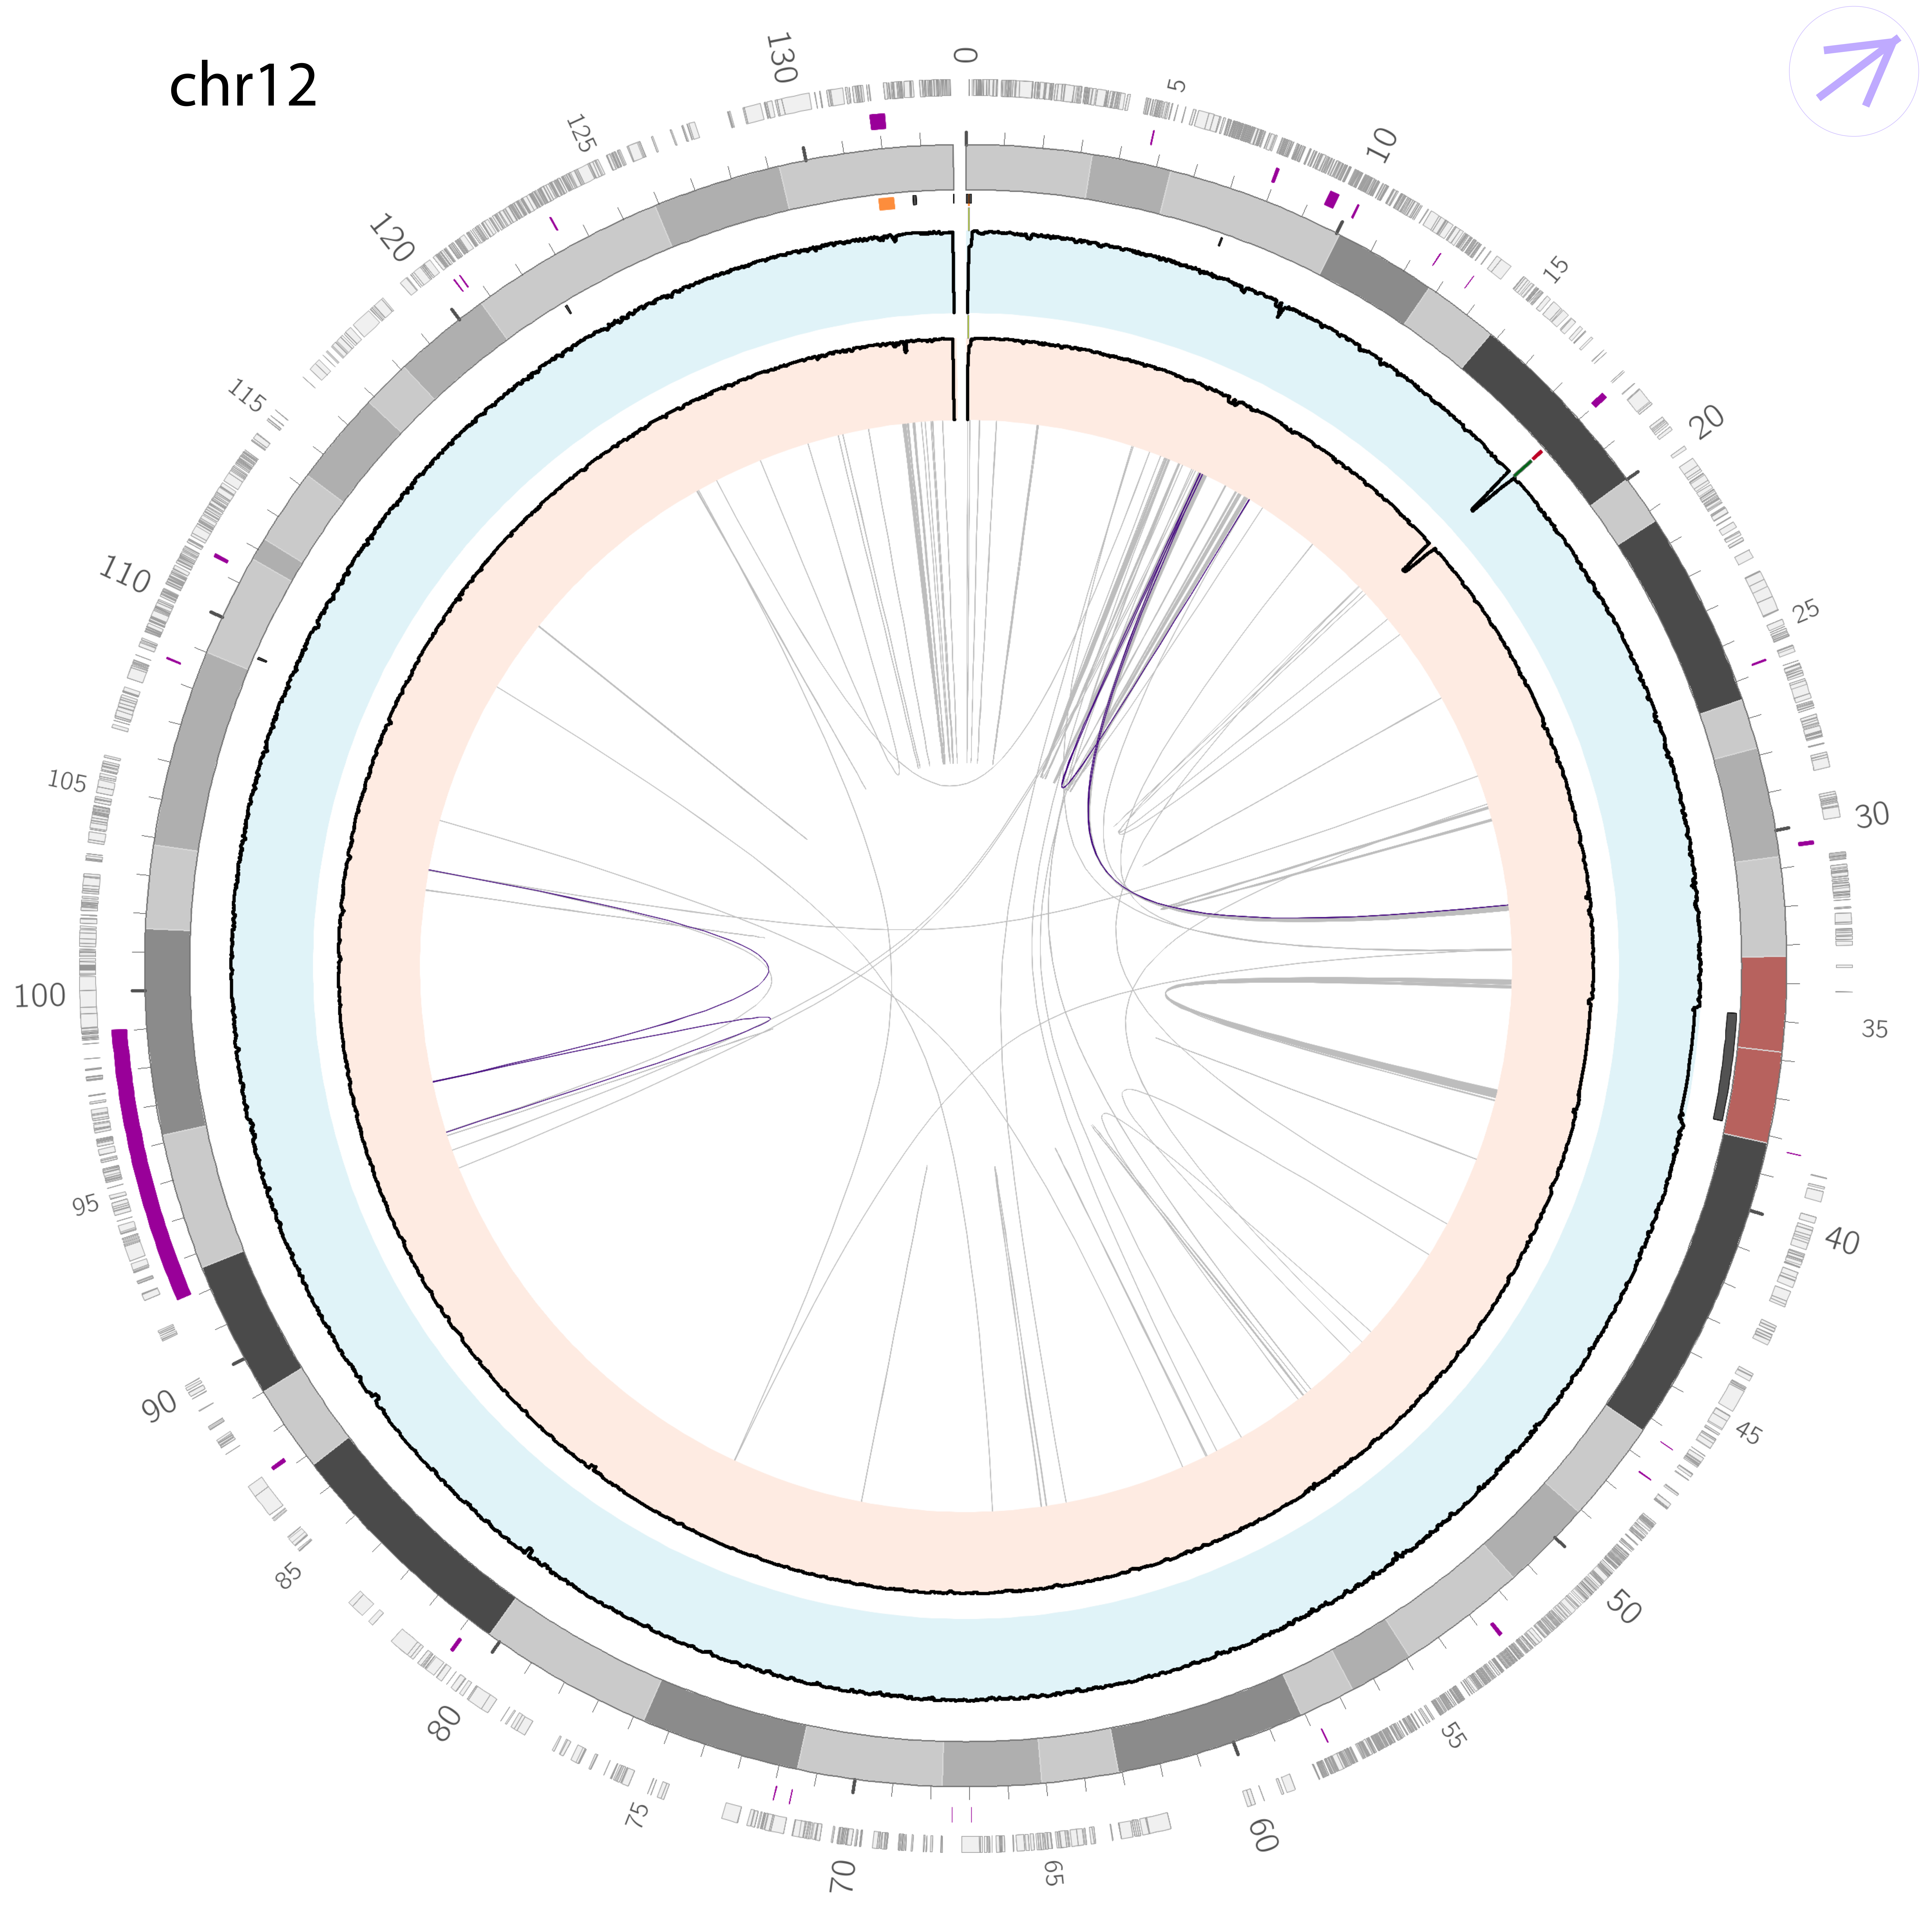



chr13

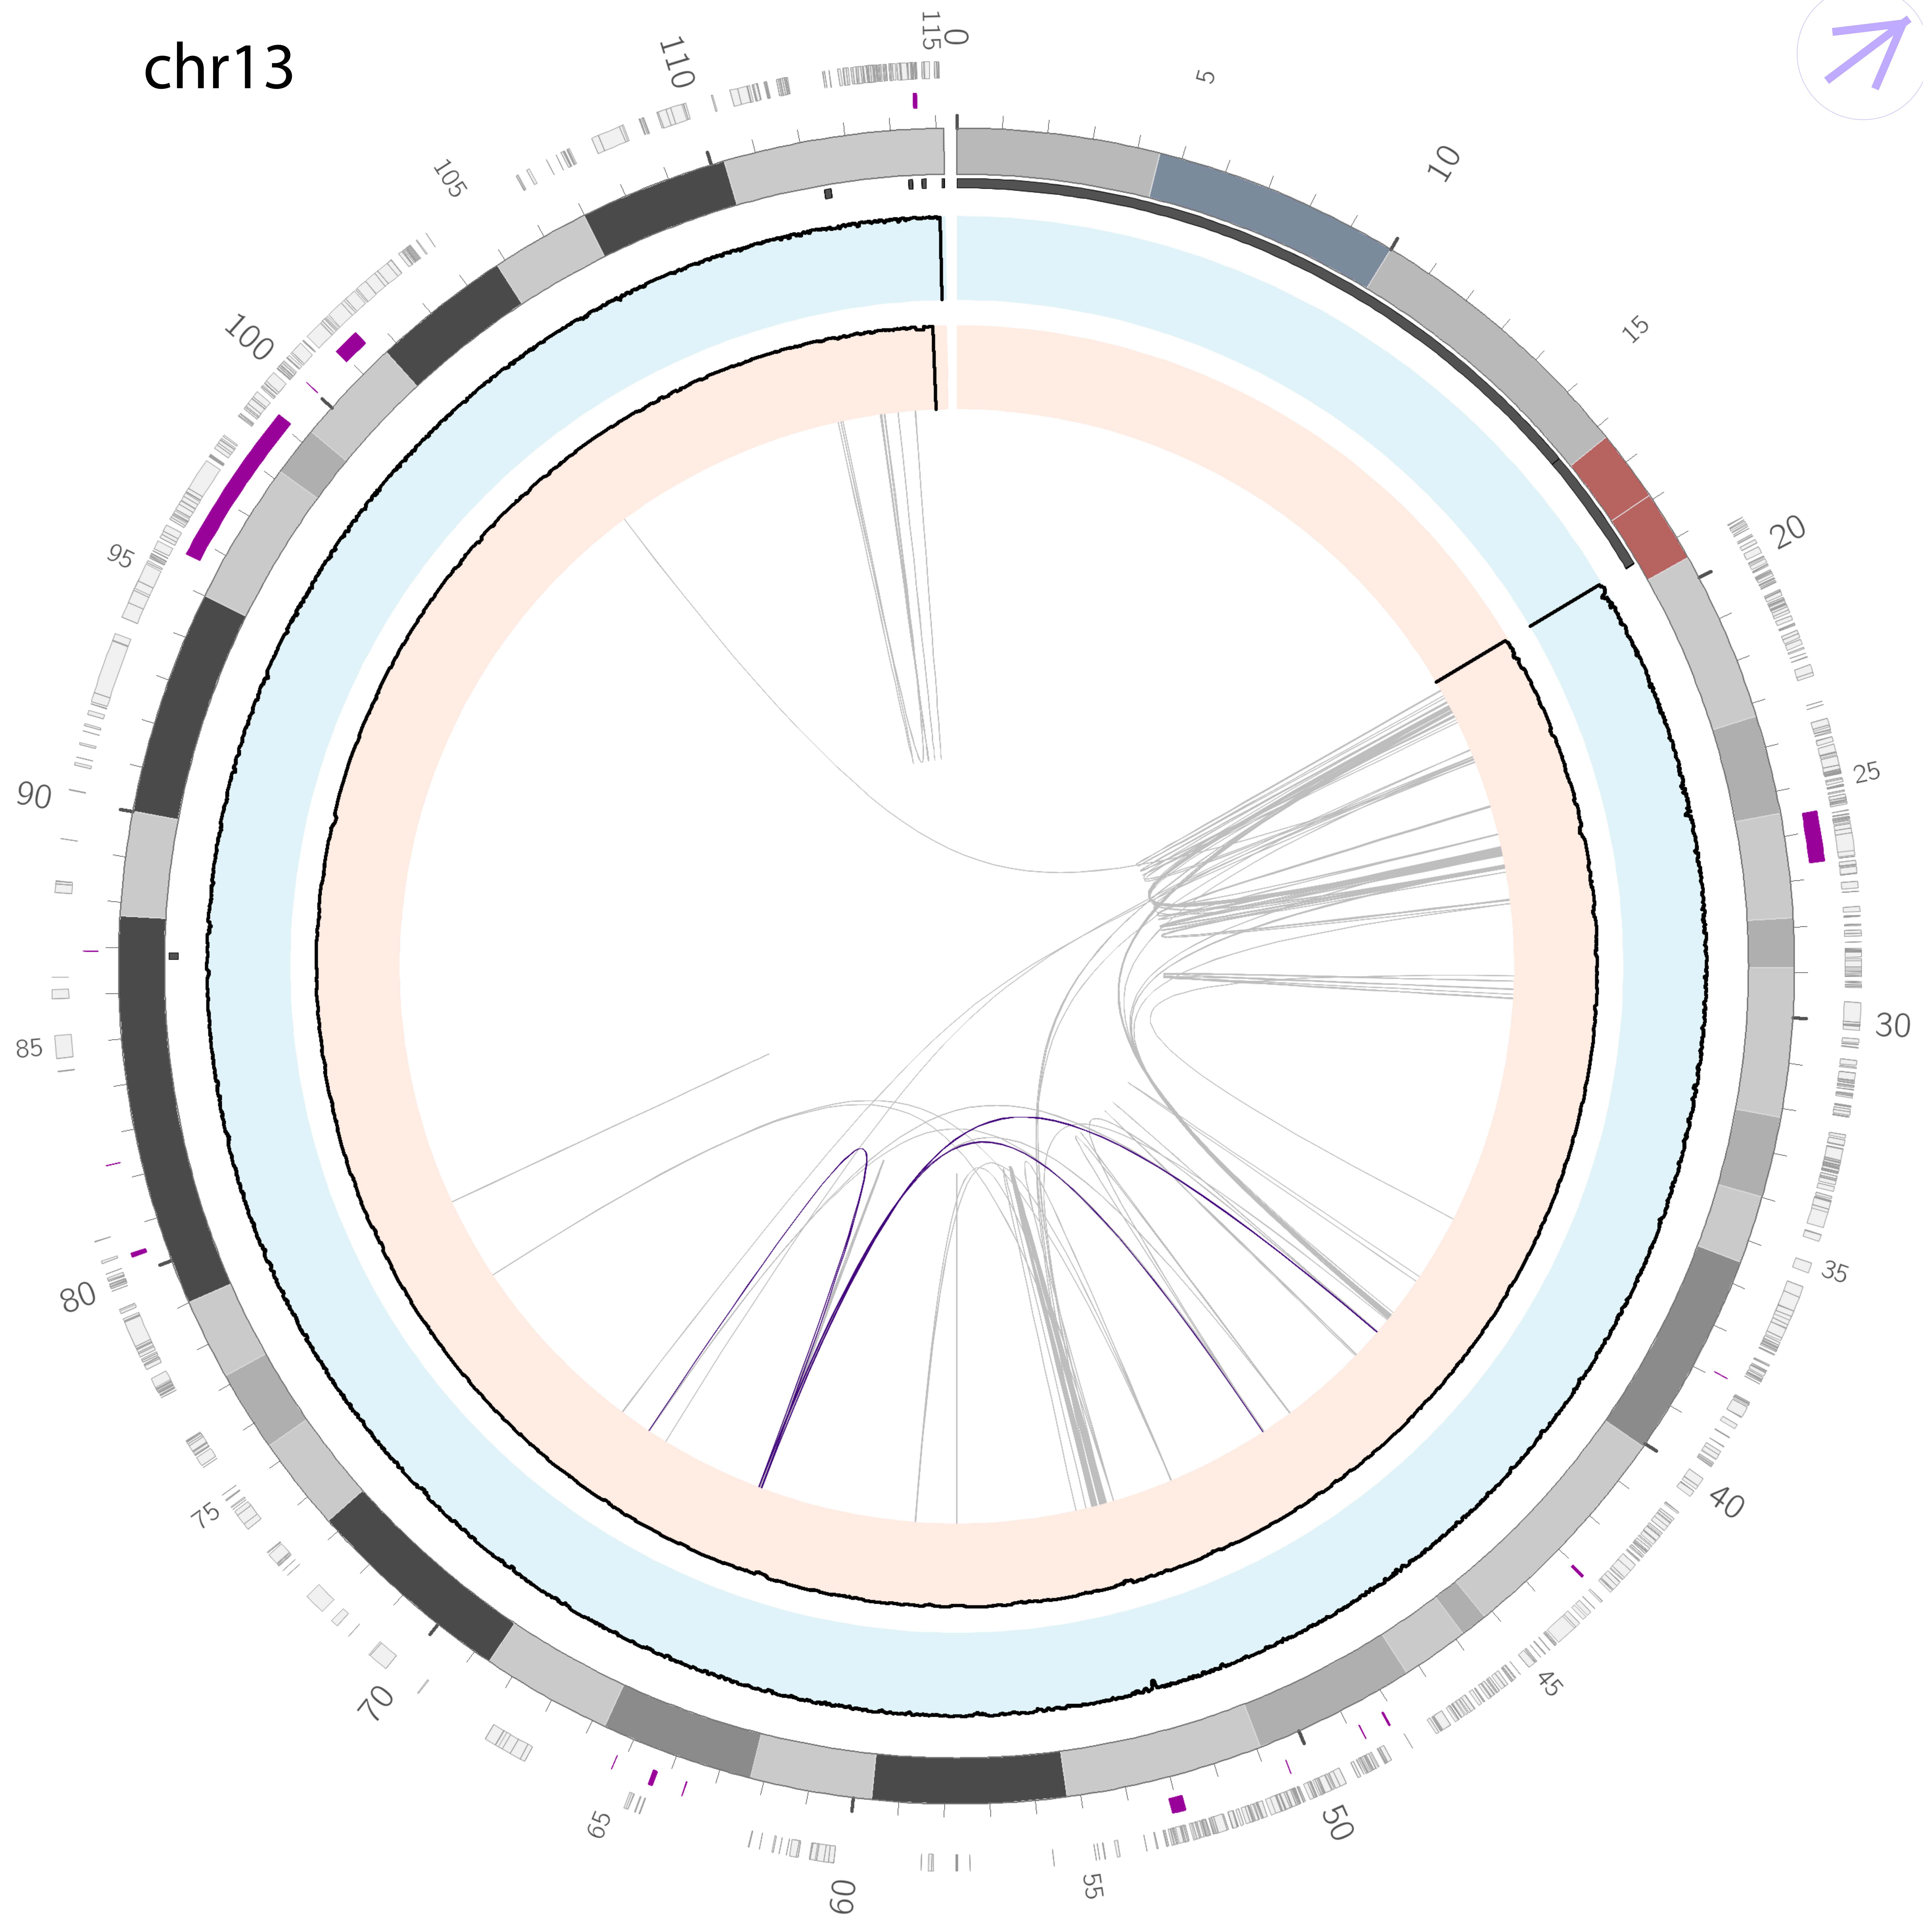



chr14

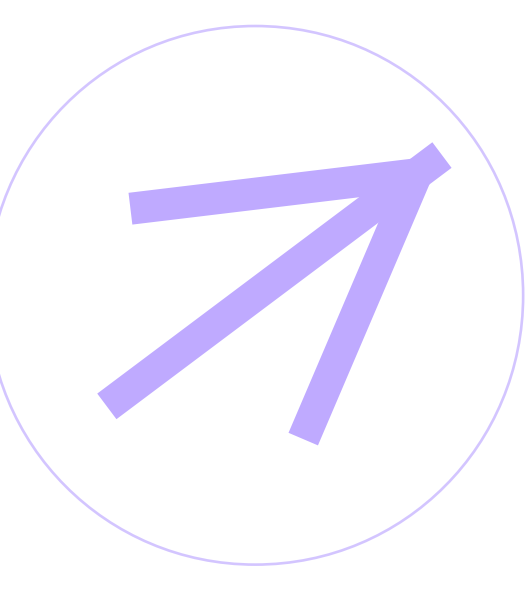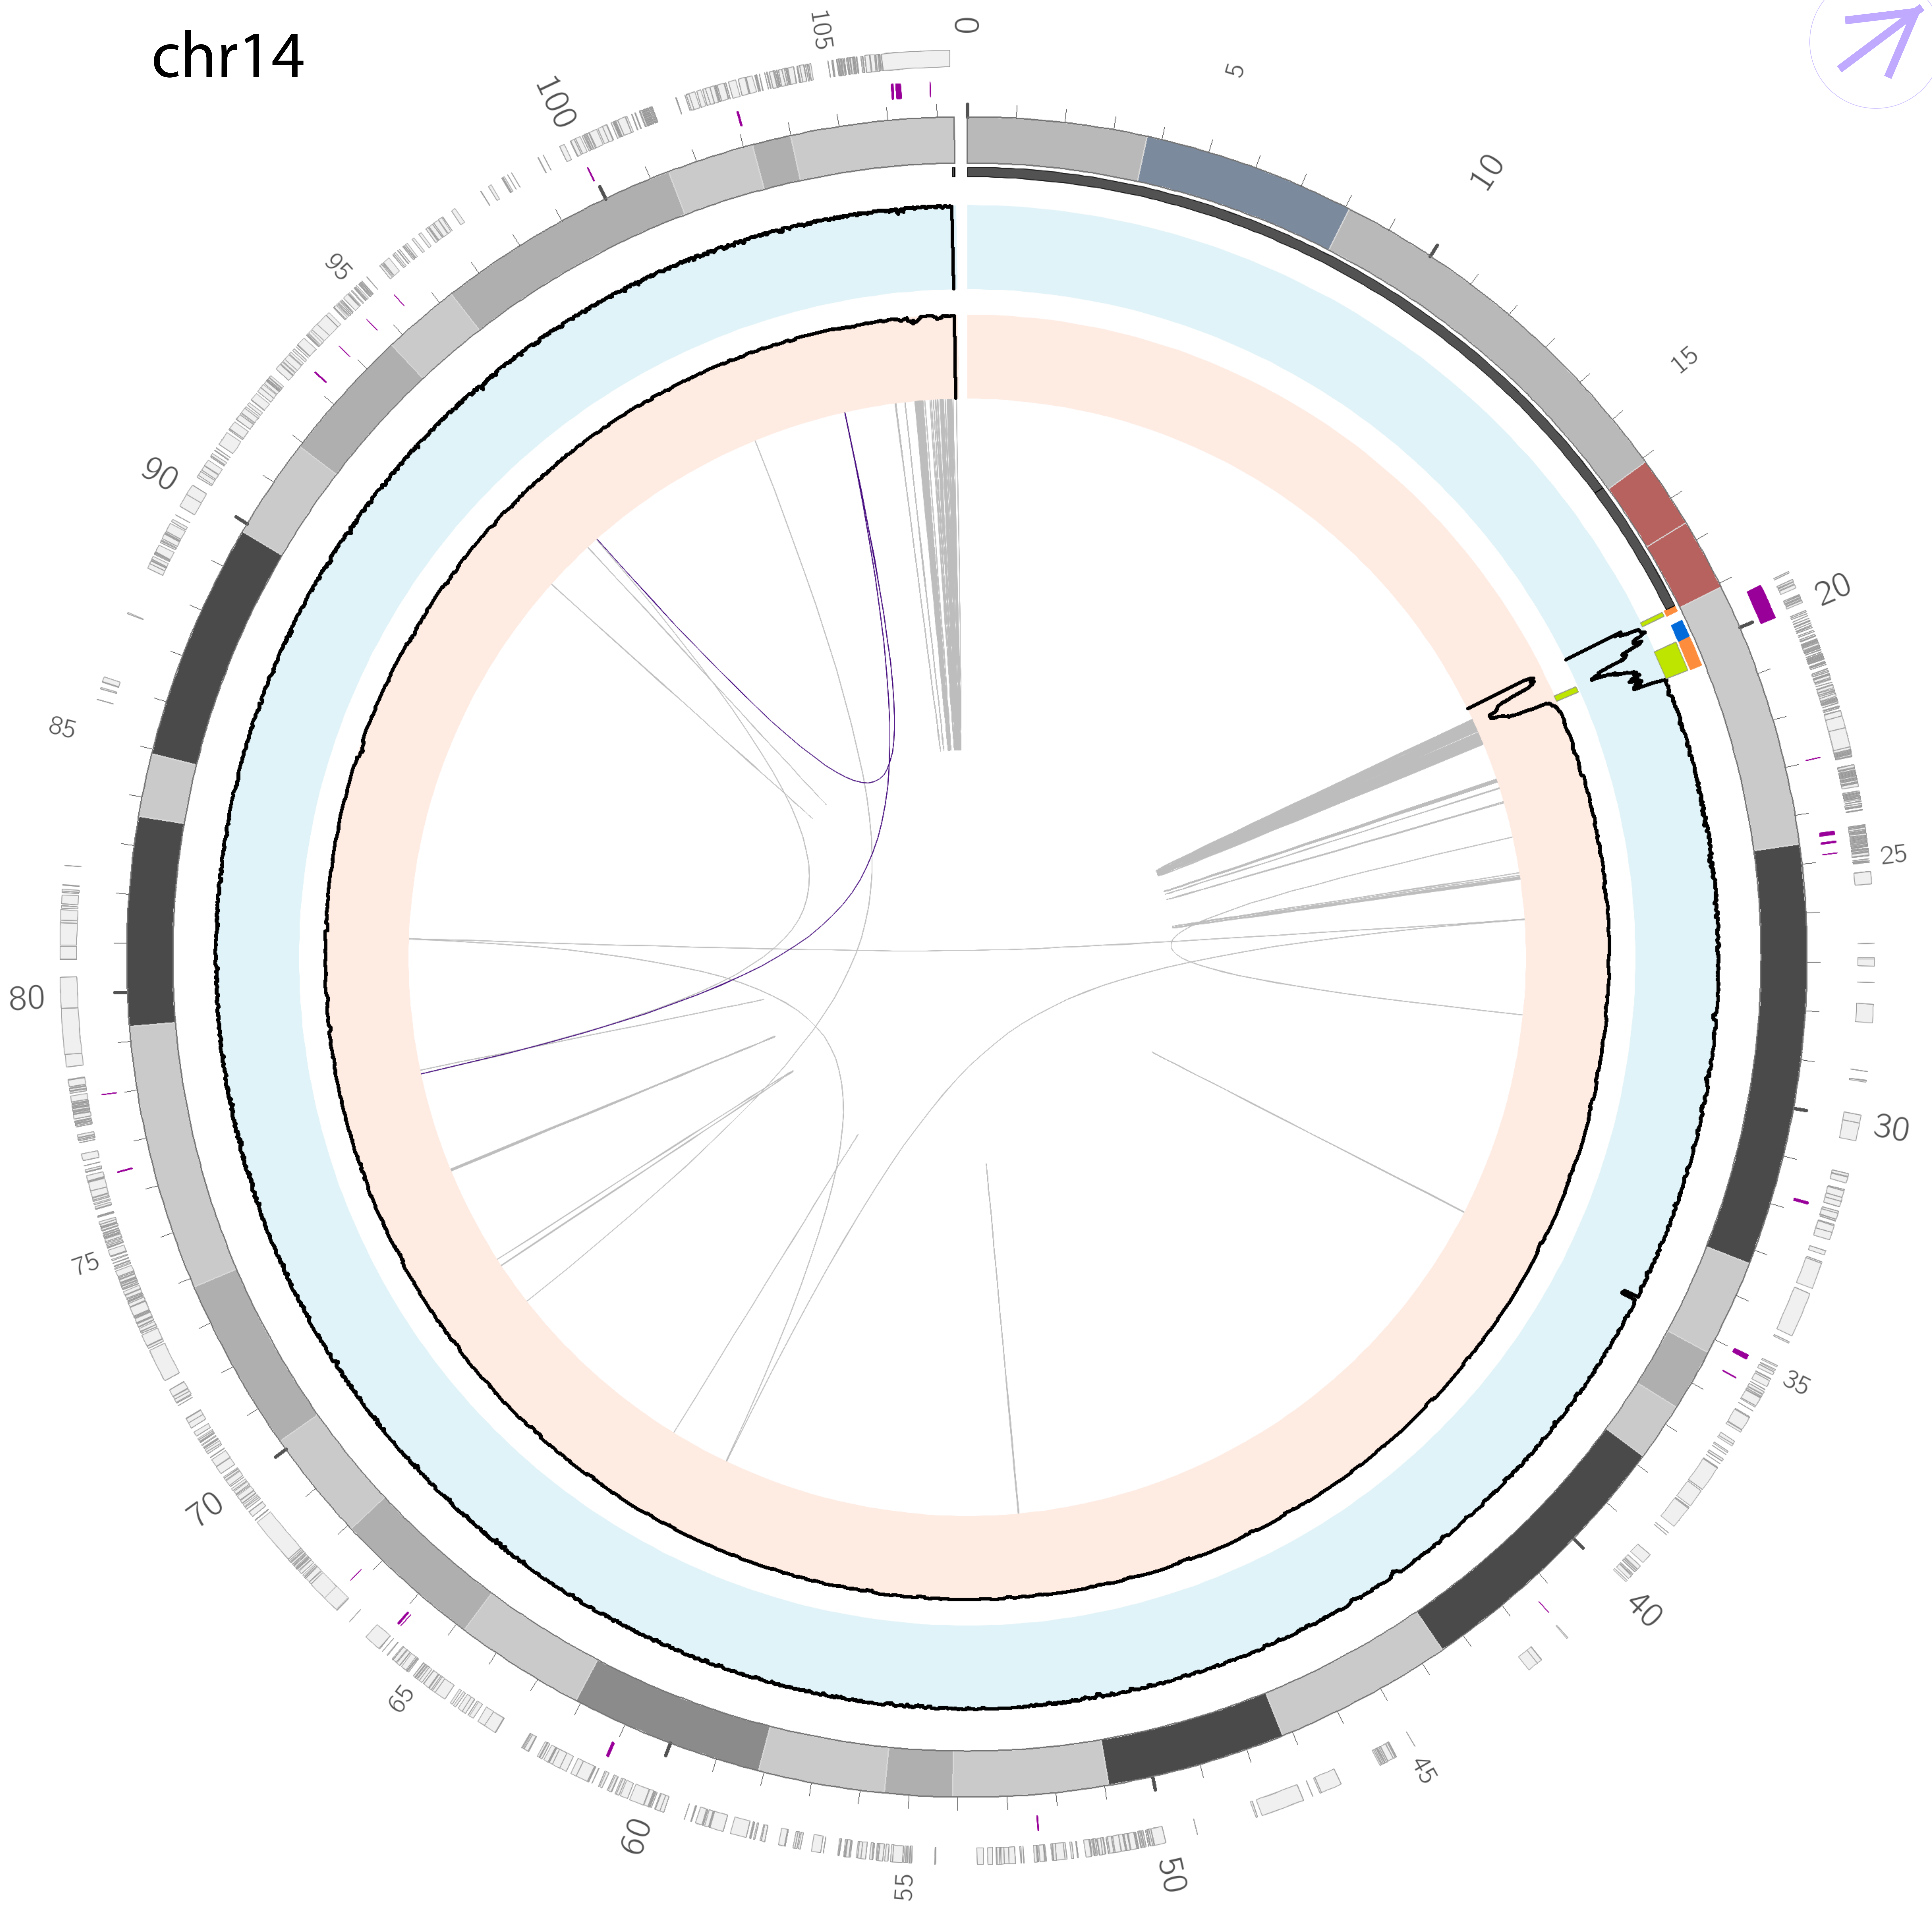



chr15

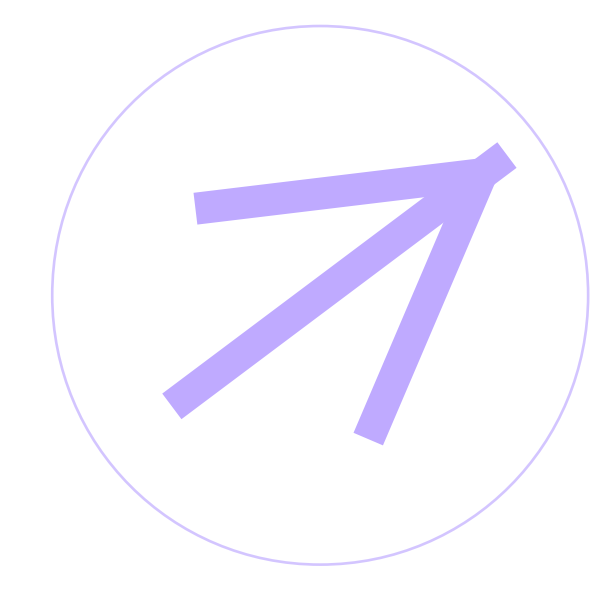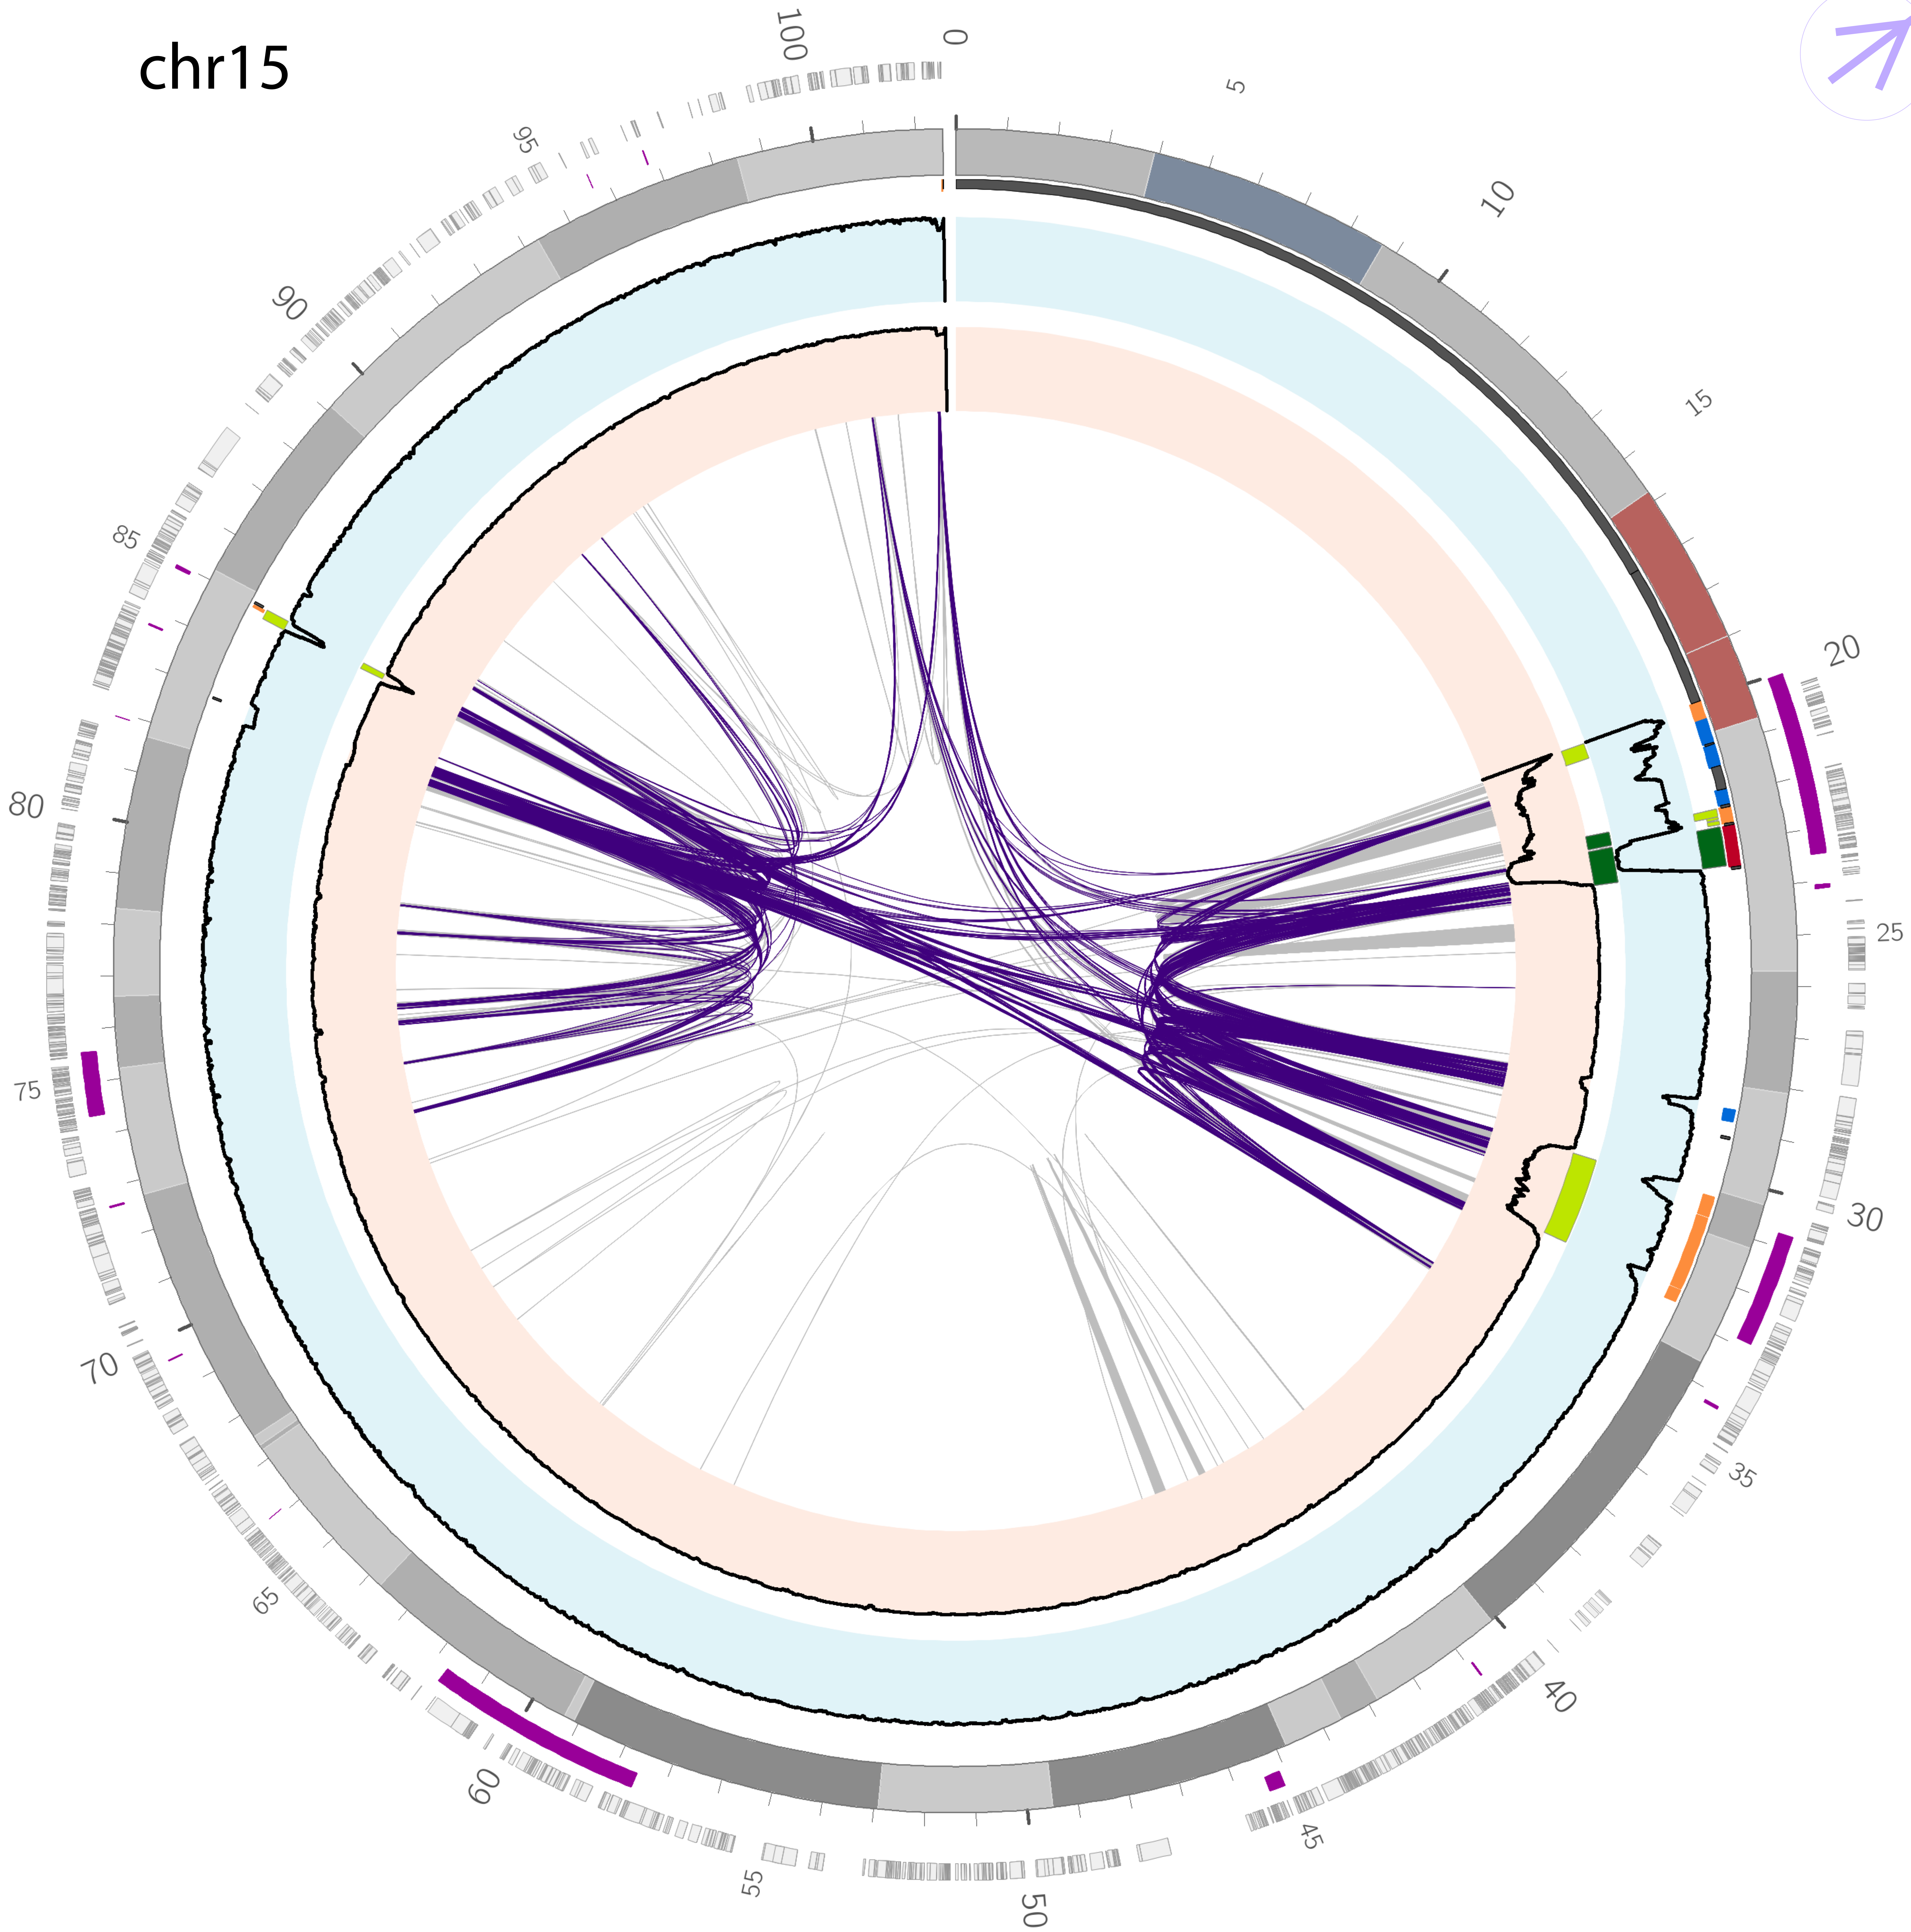



chr16

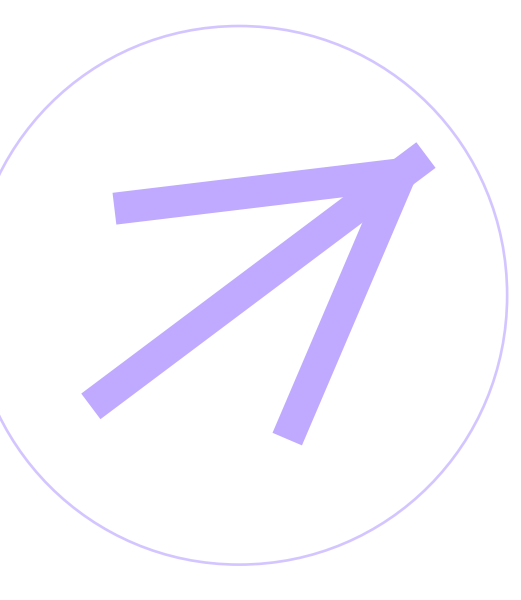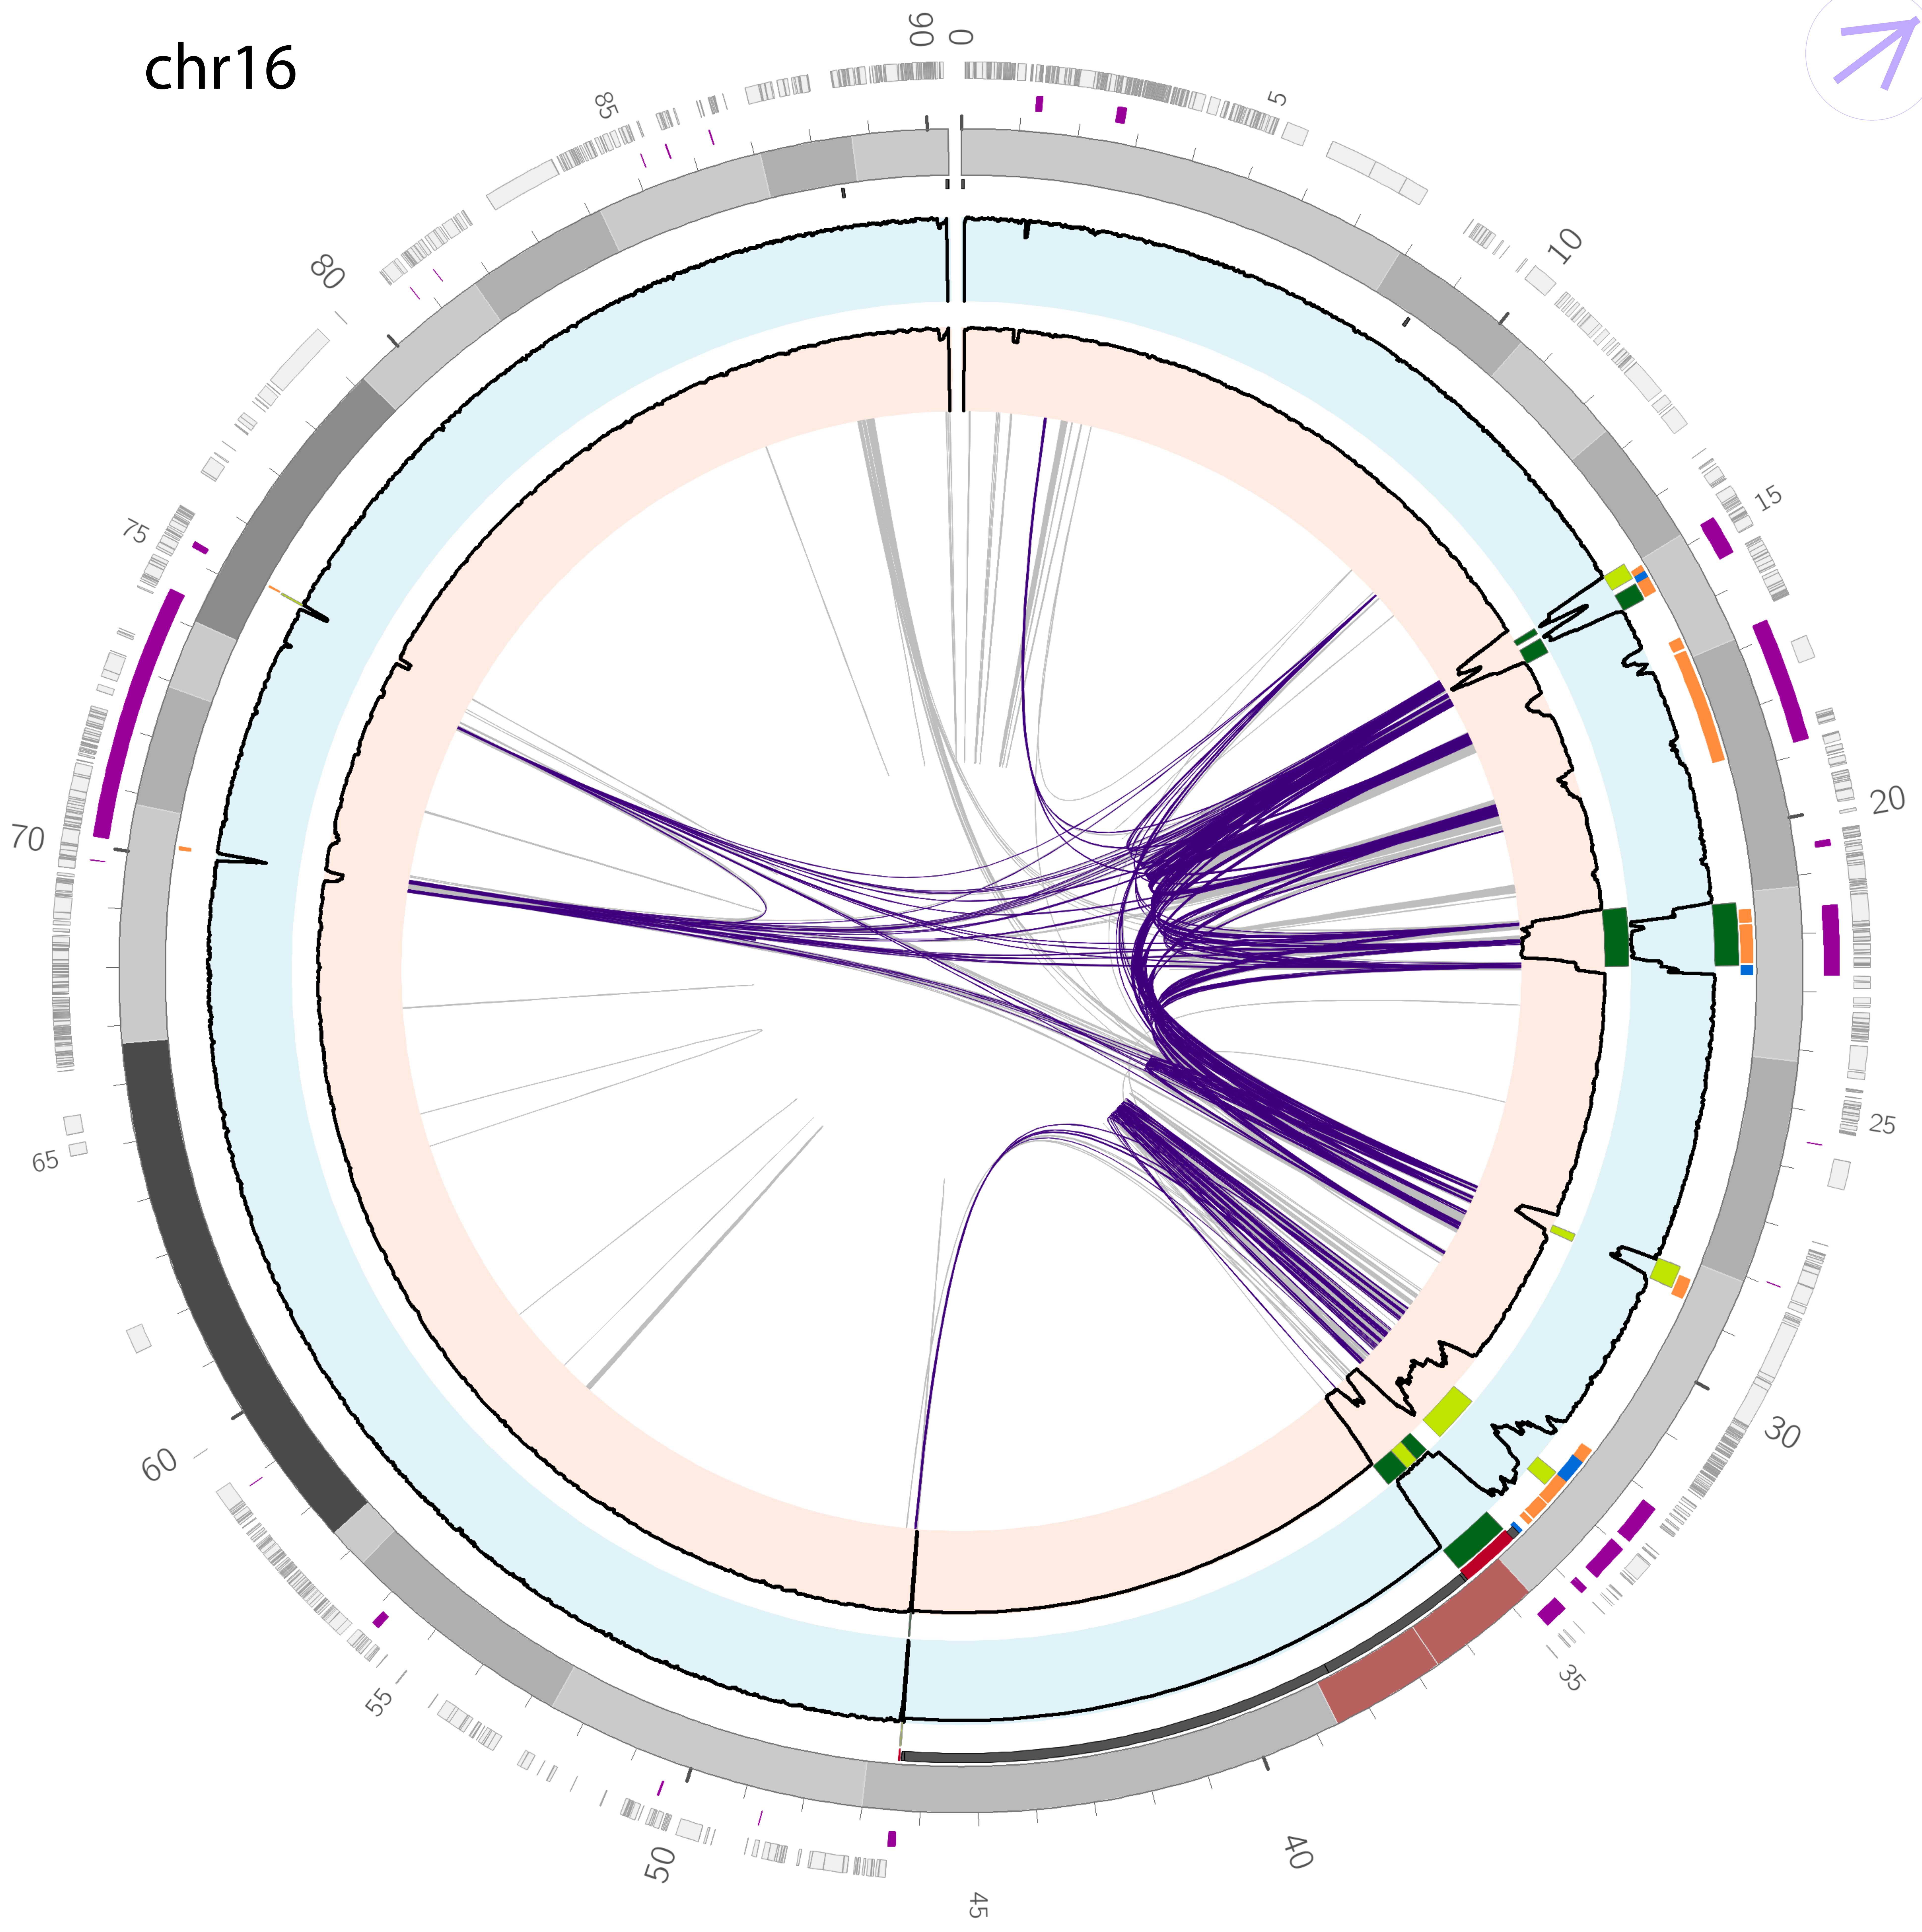



chr17

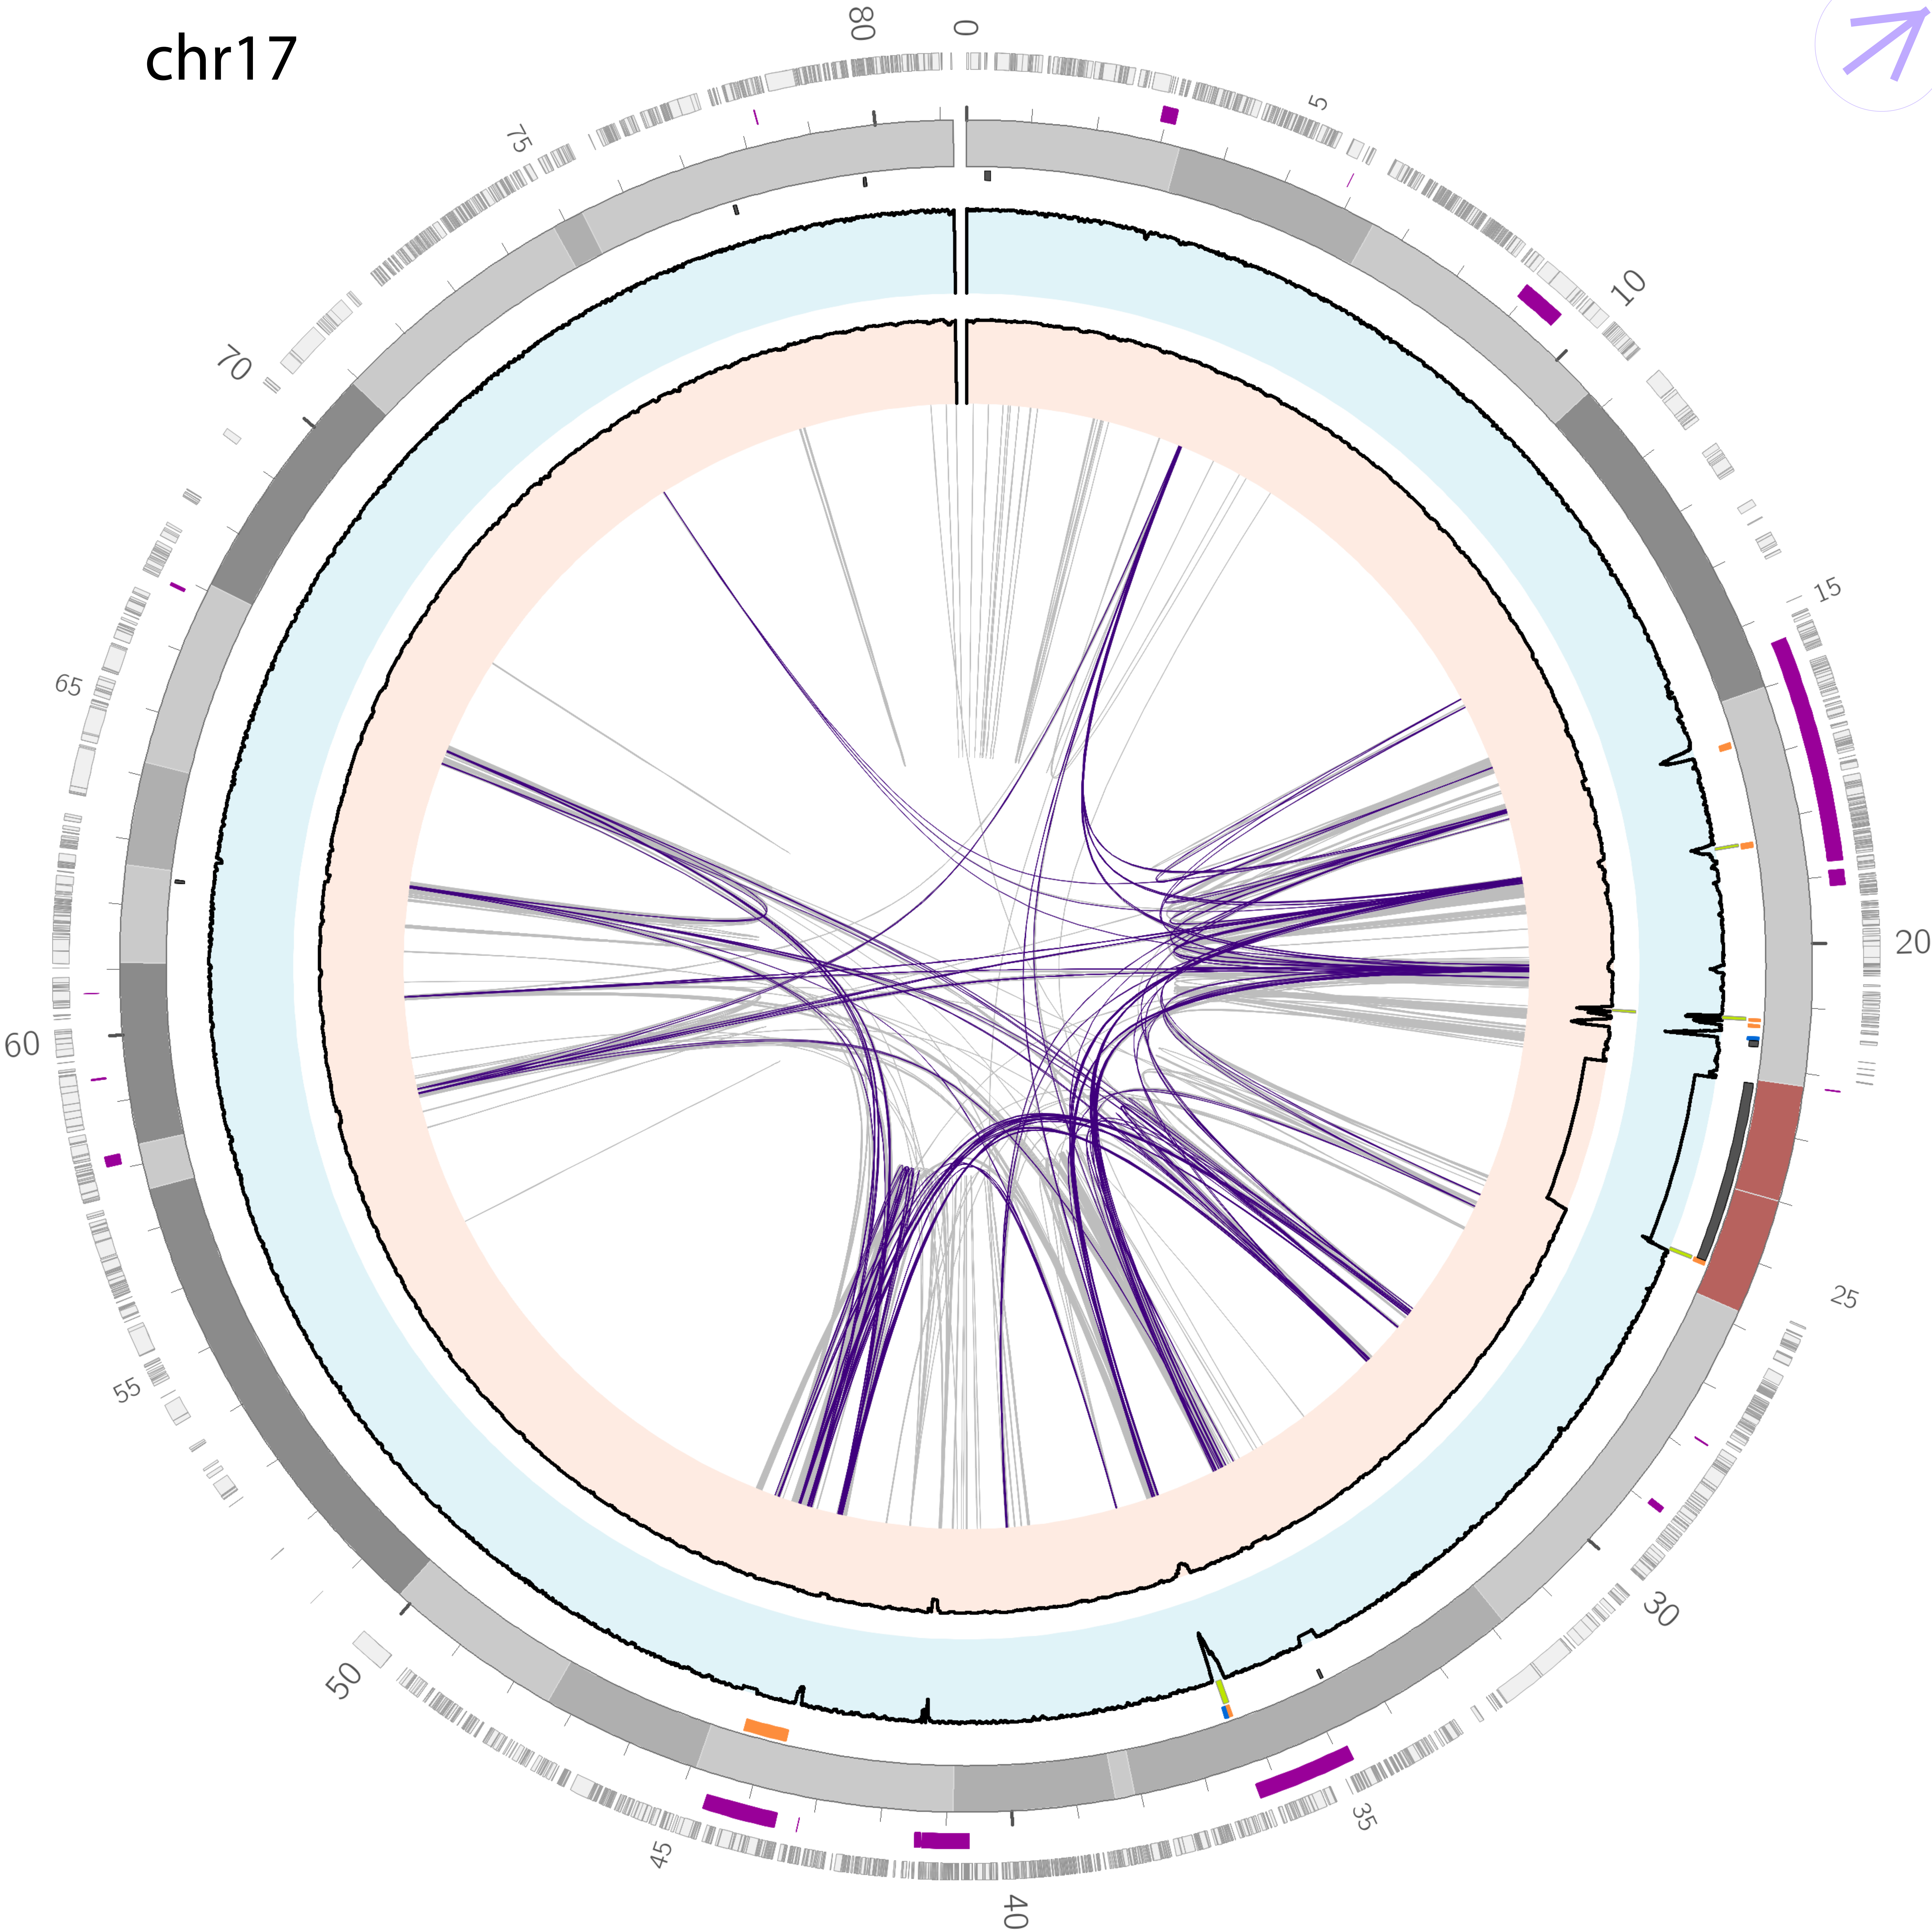



chr18

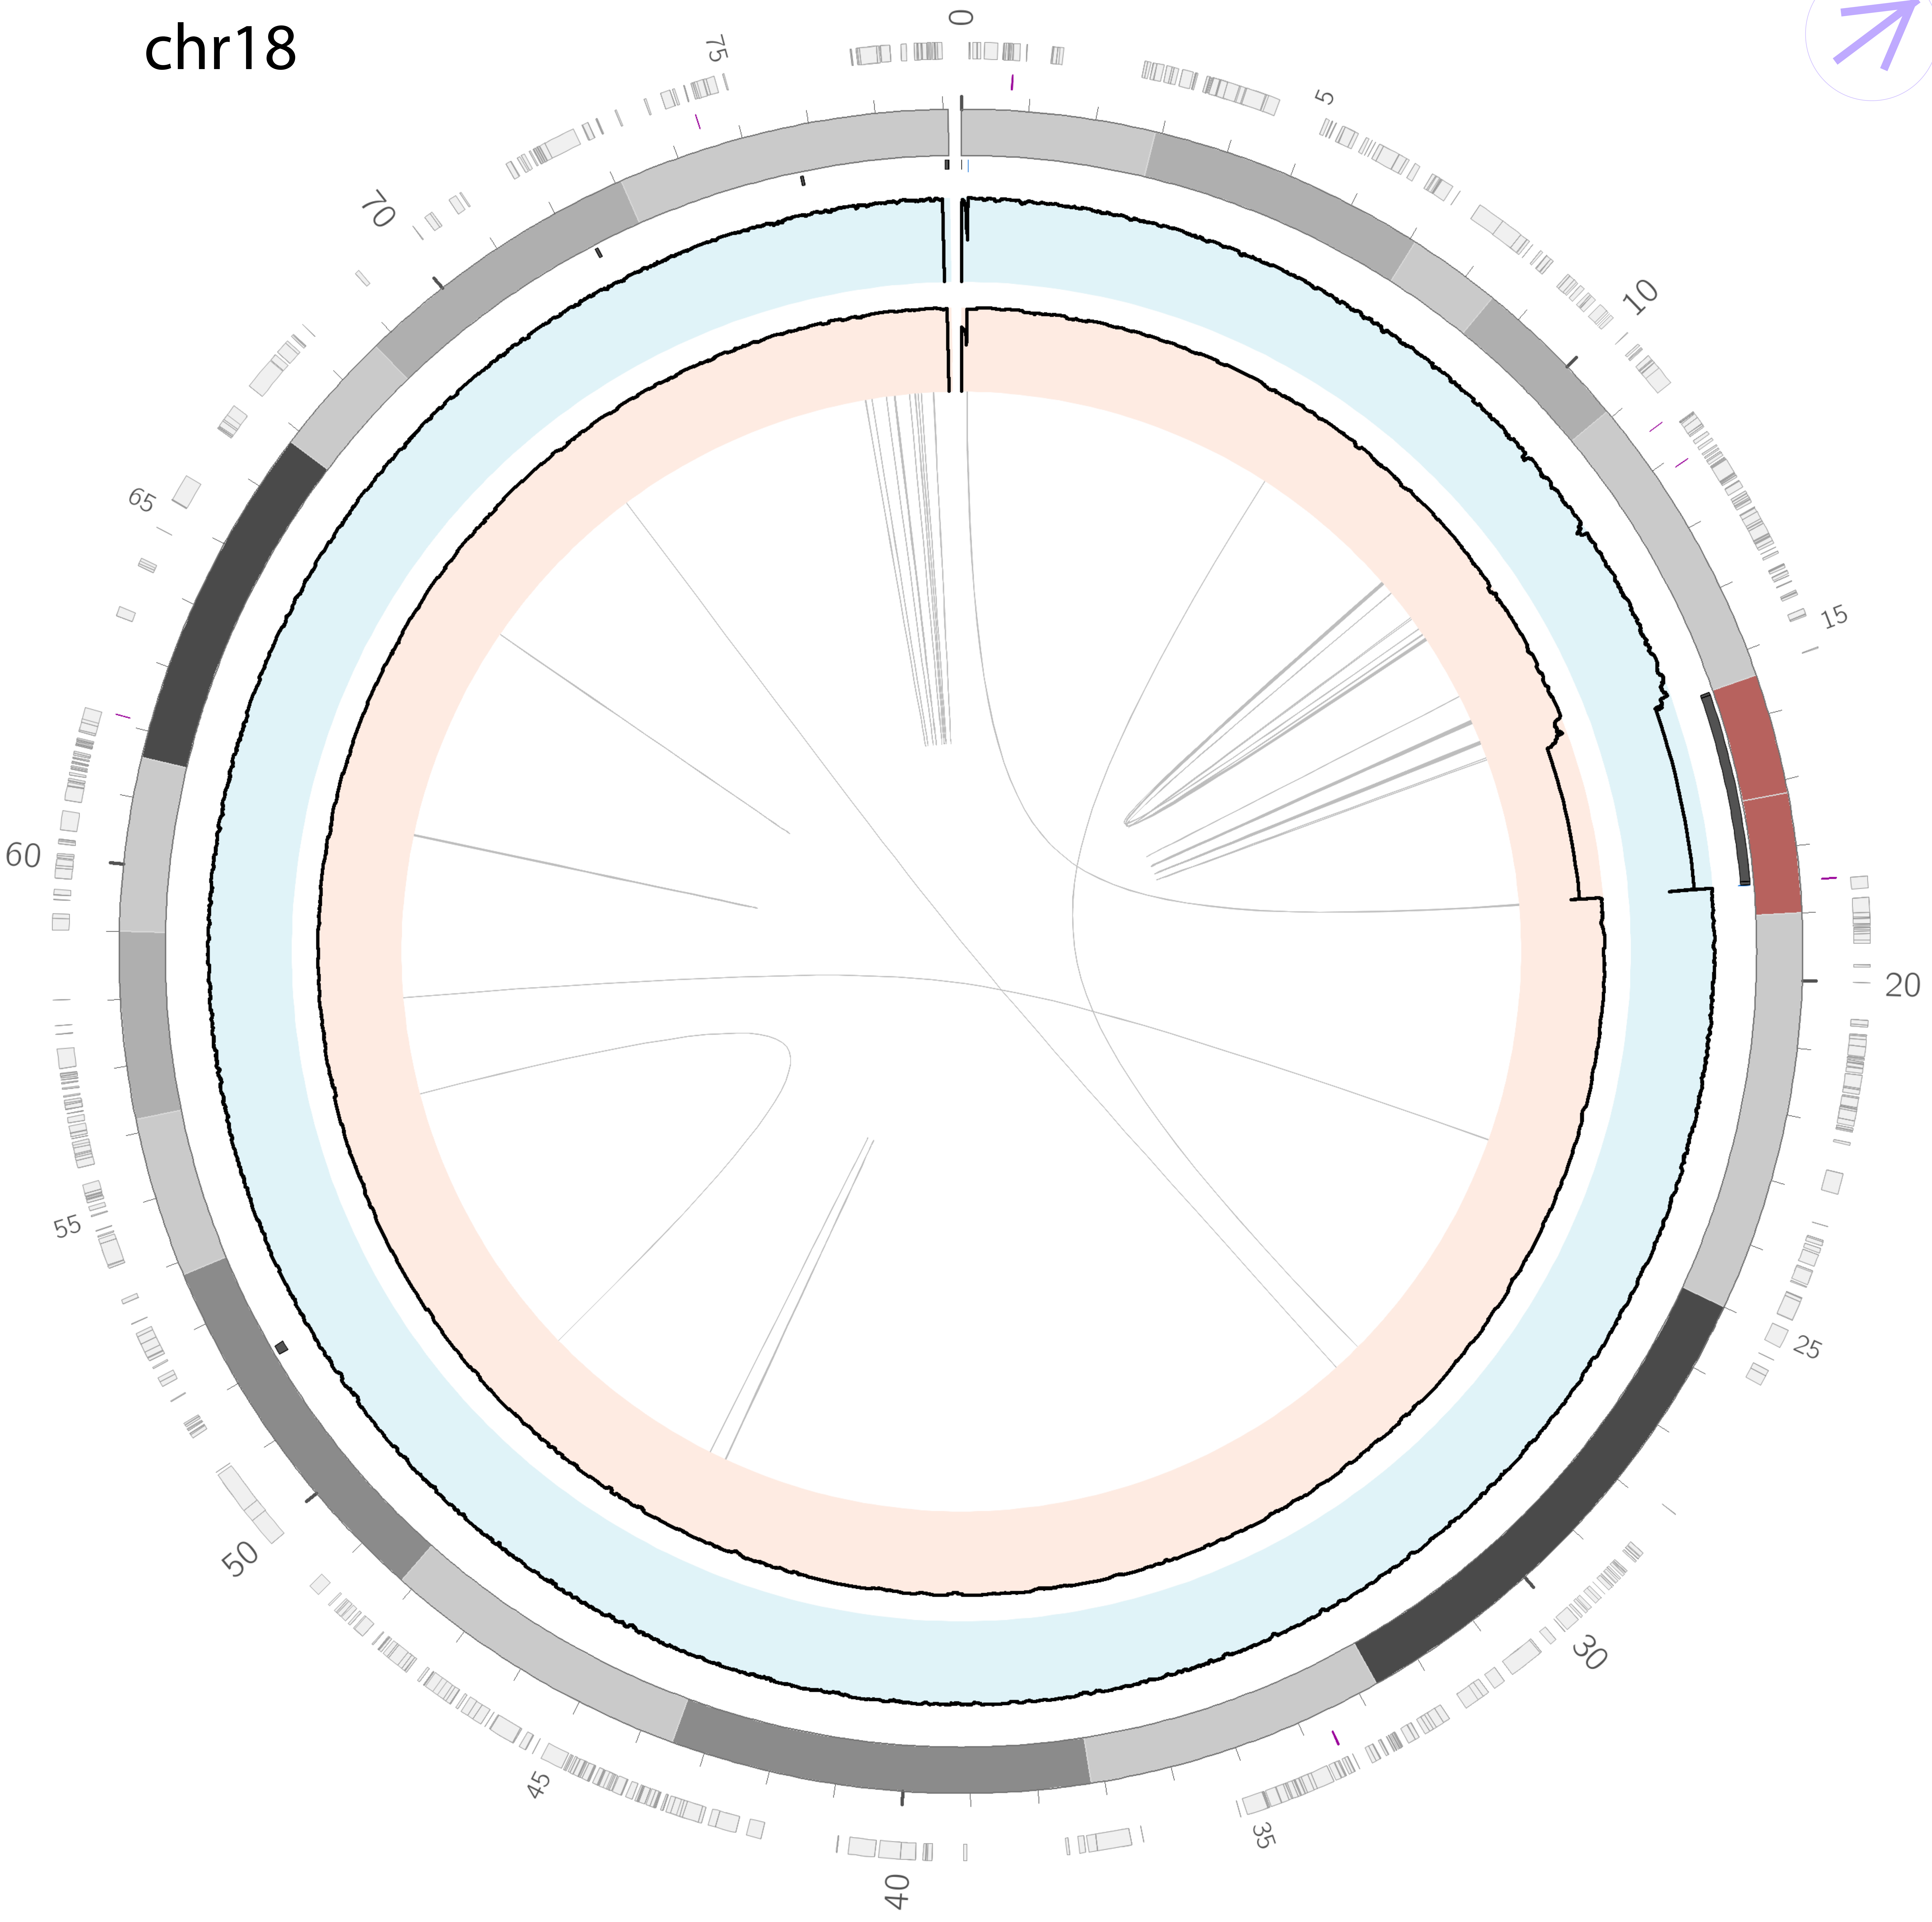



chr19

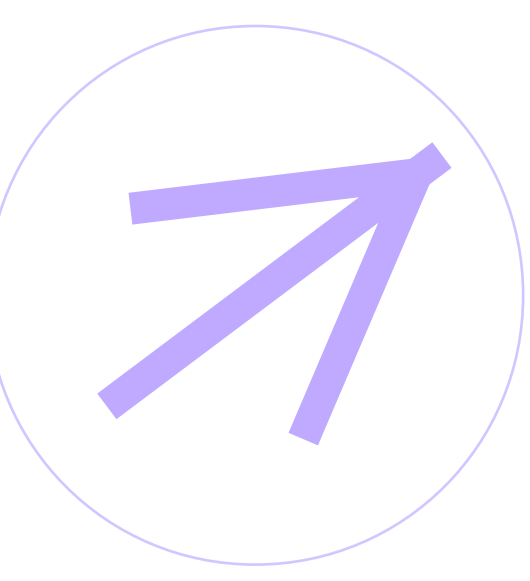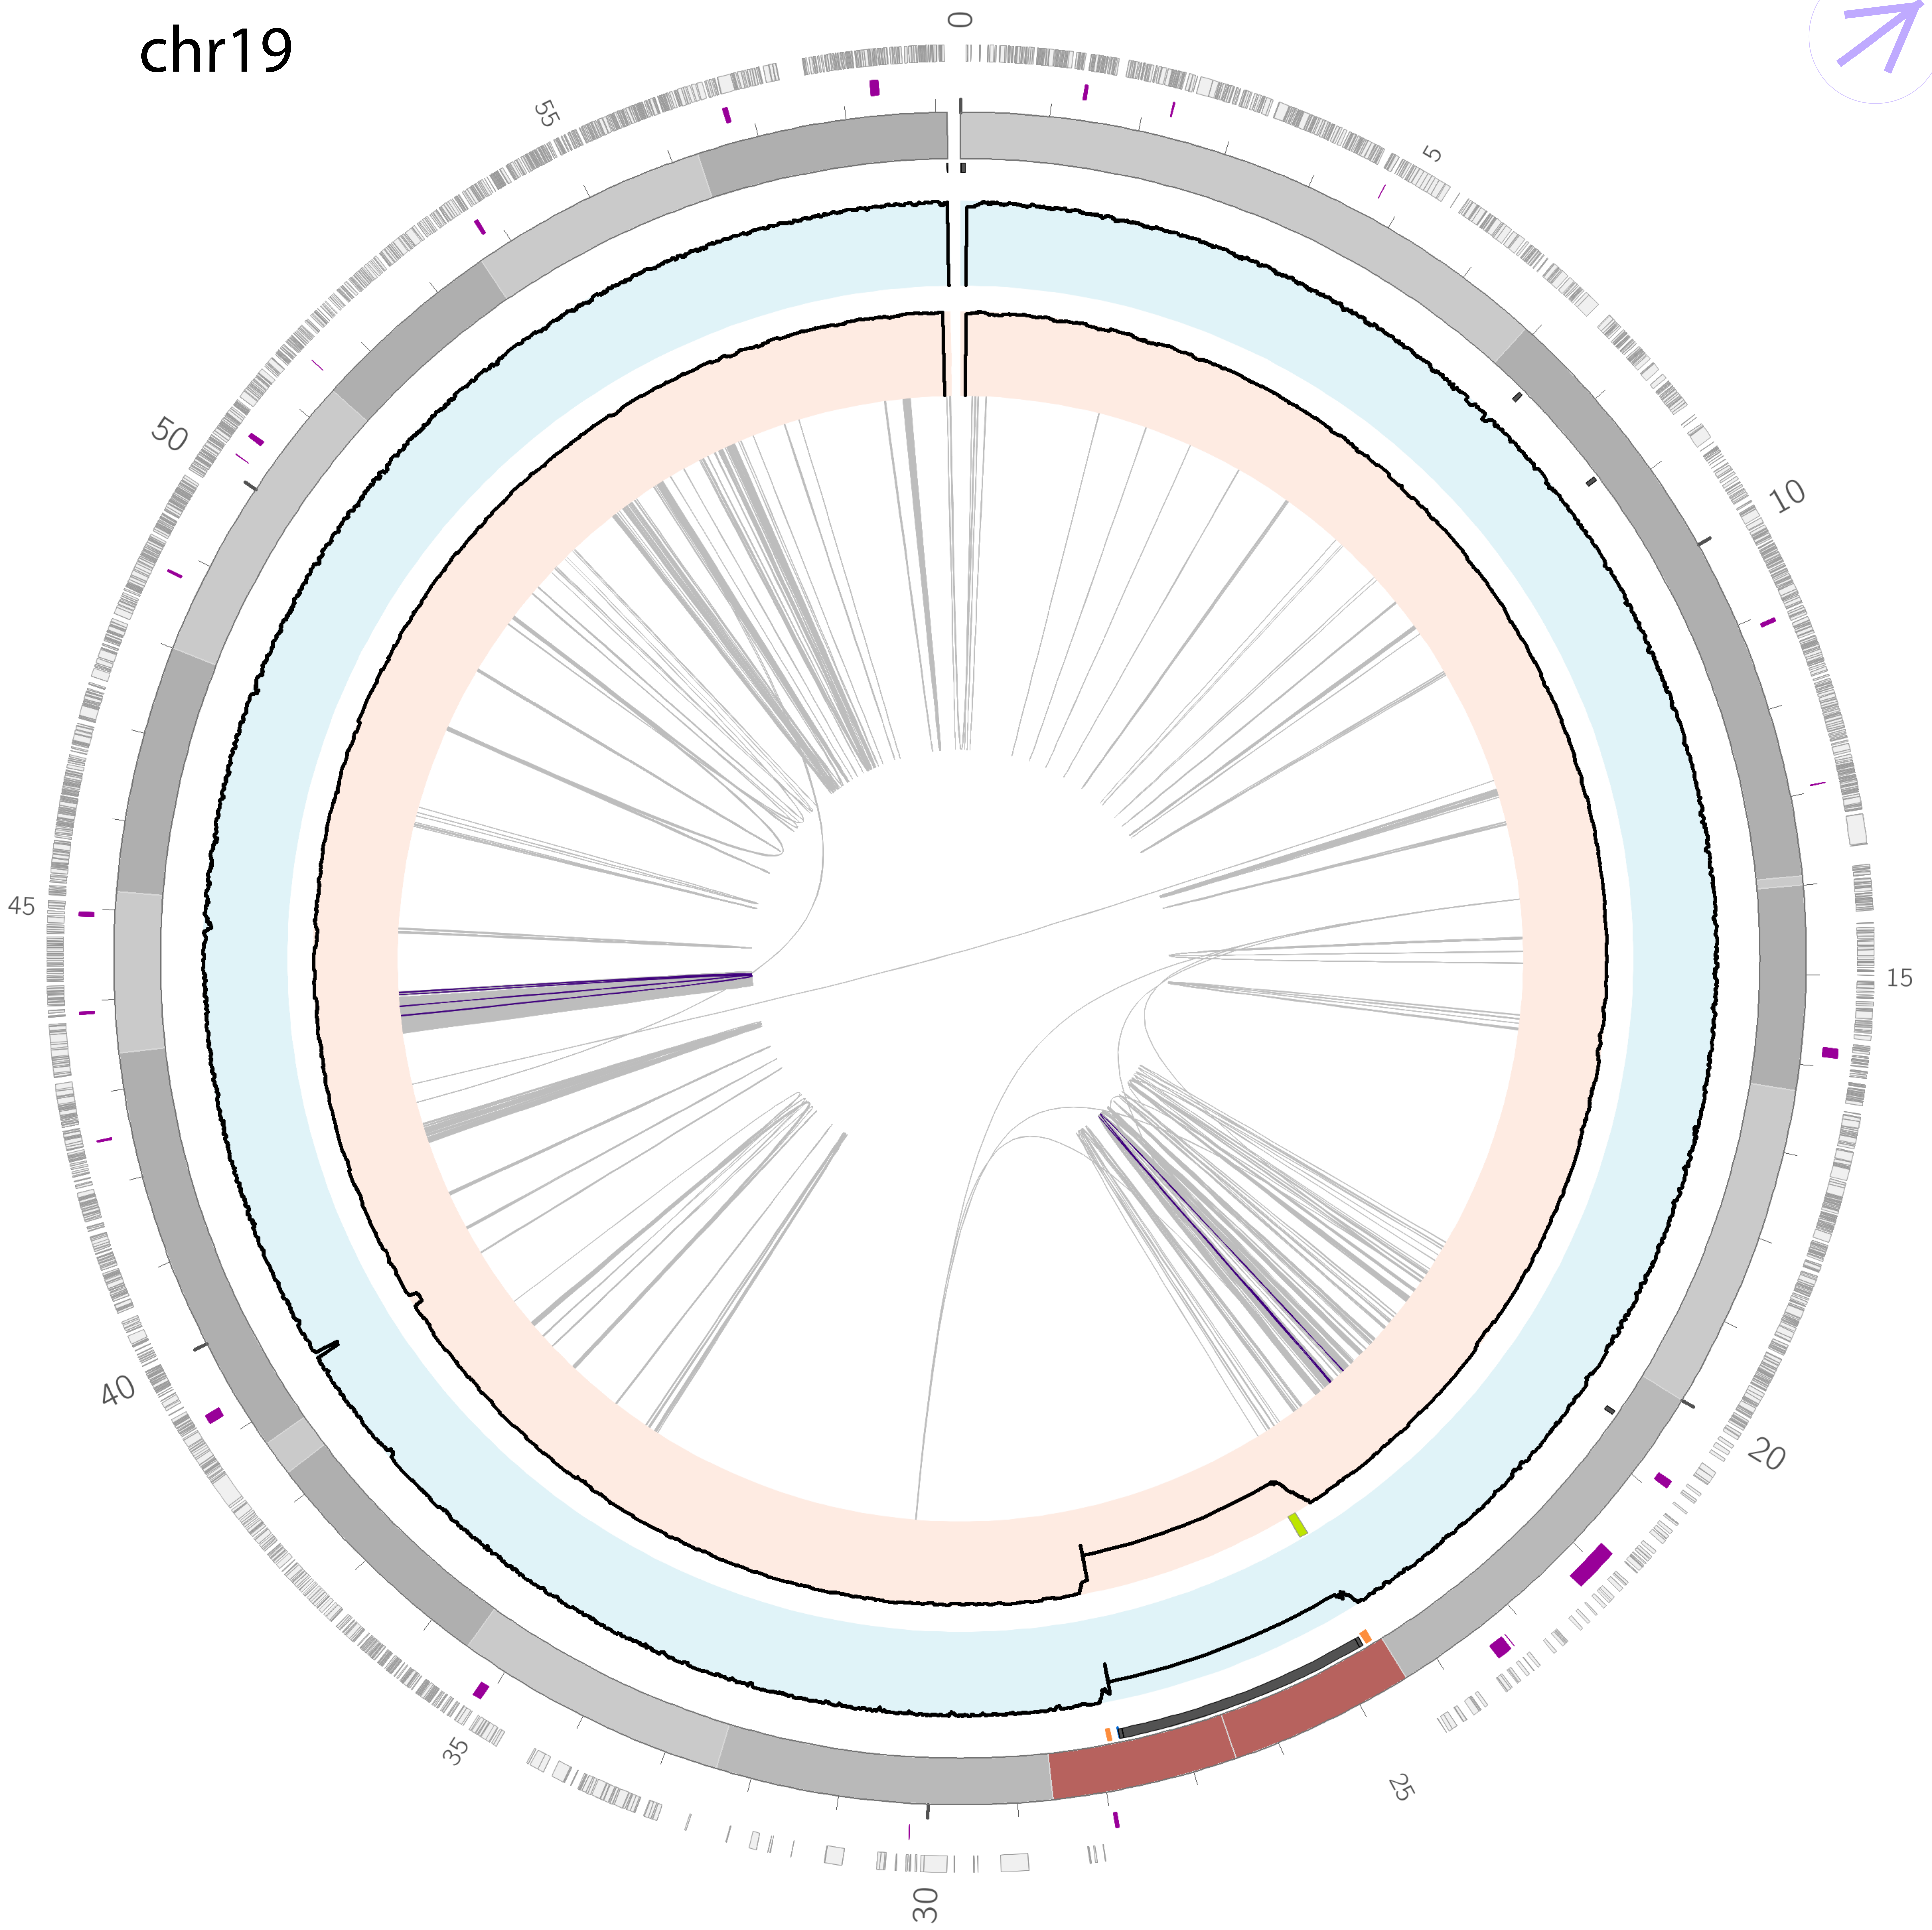



chr20

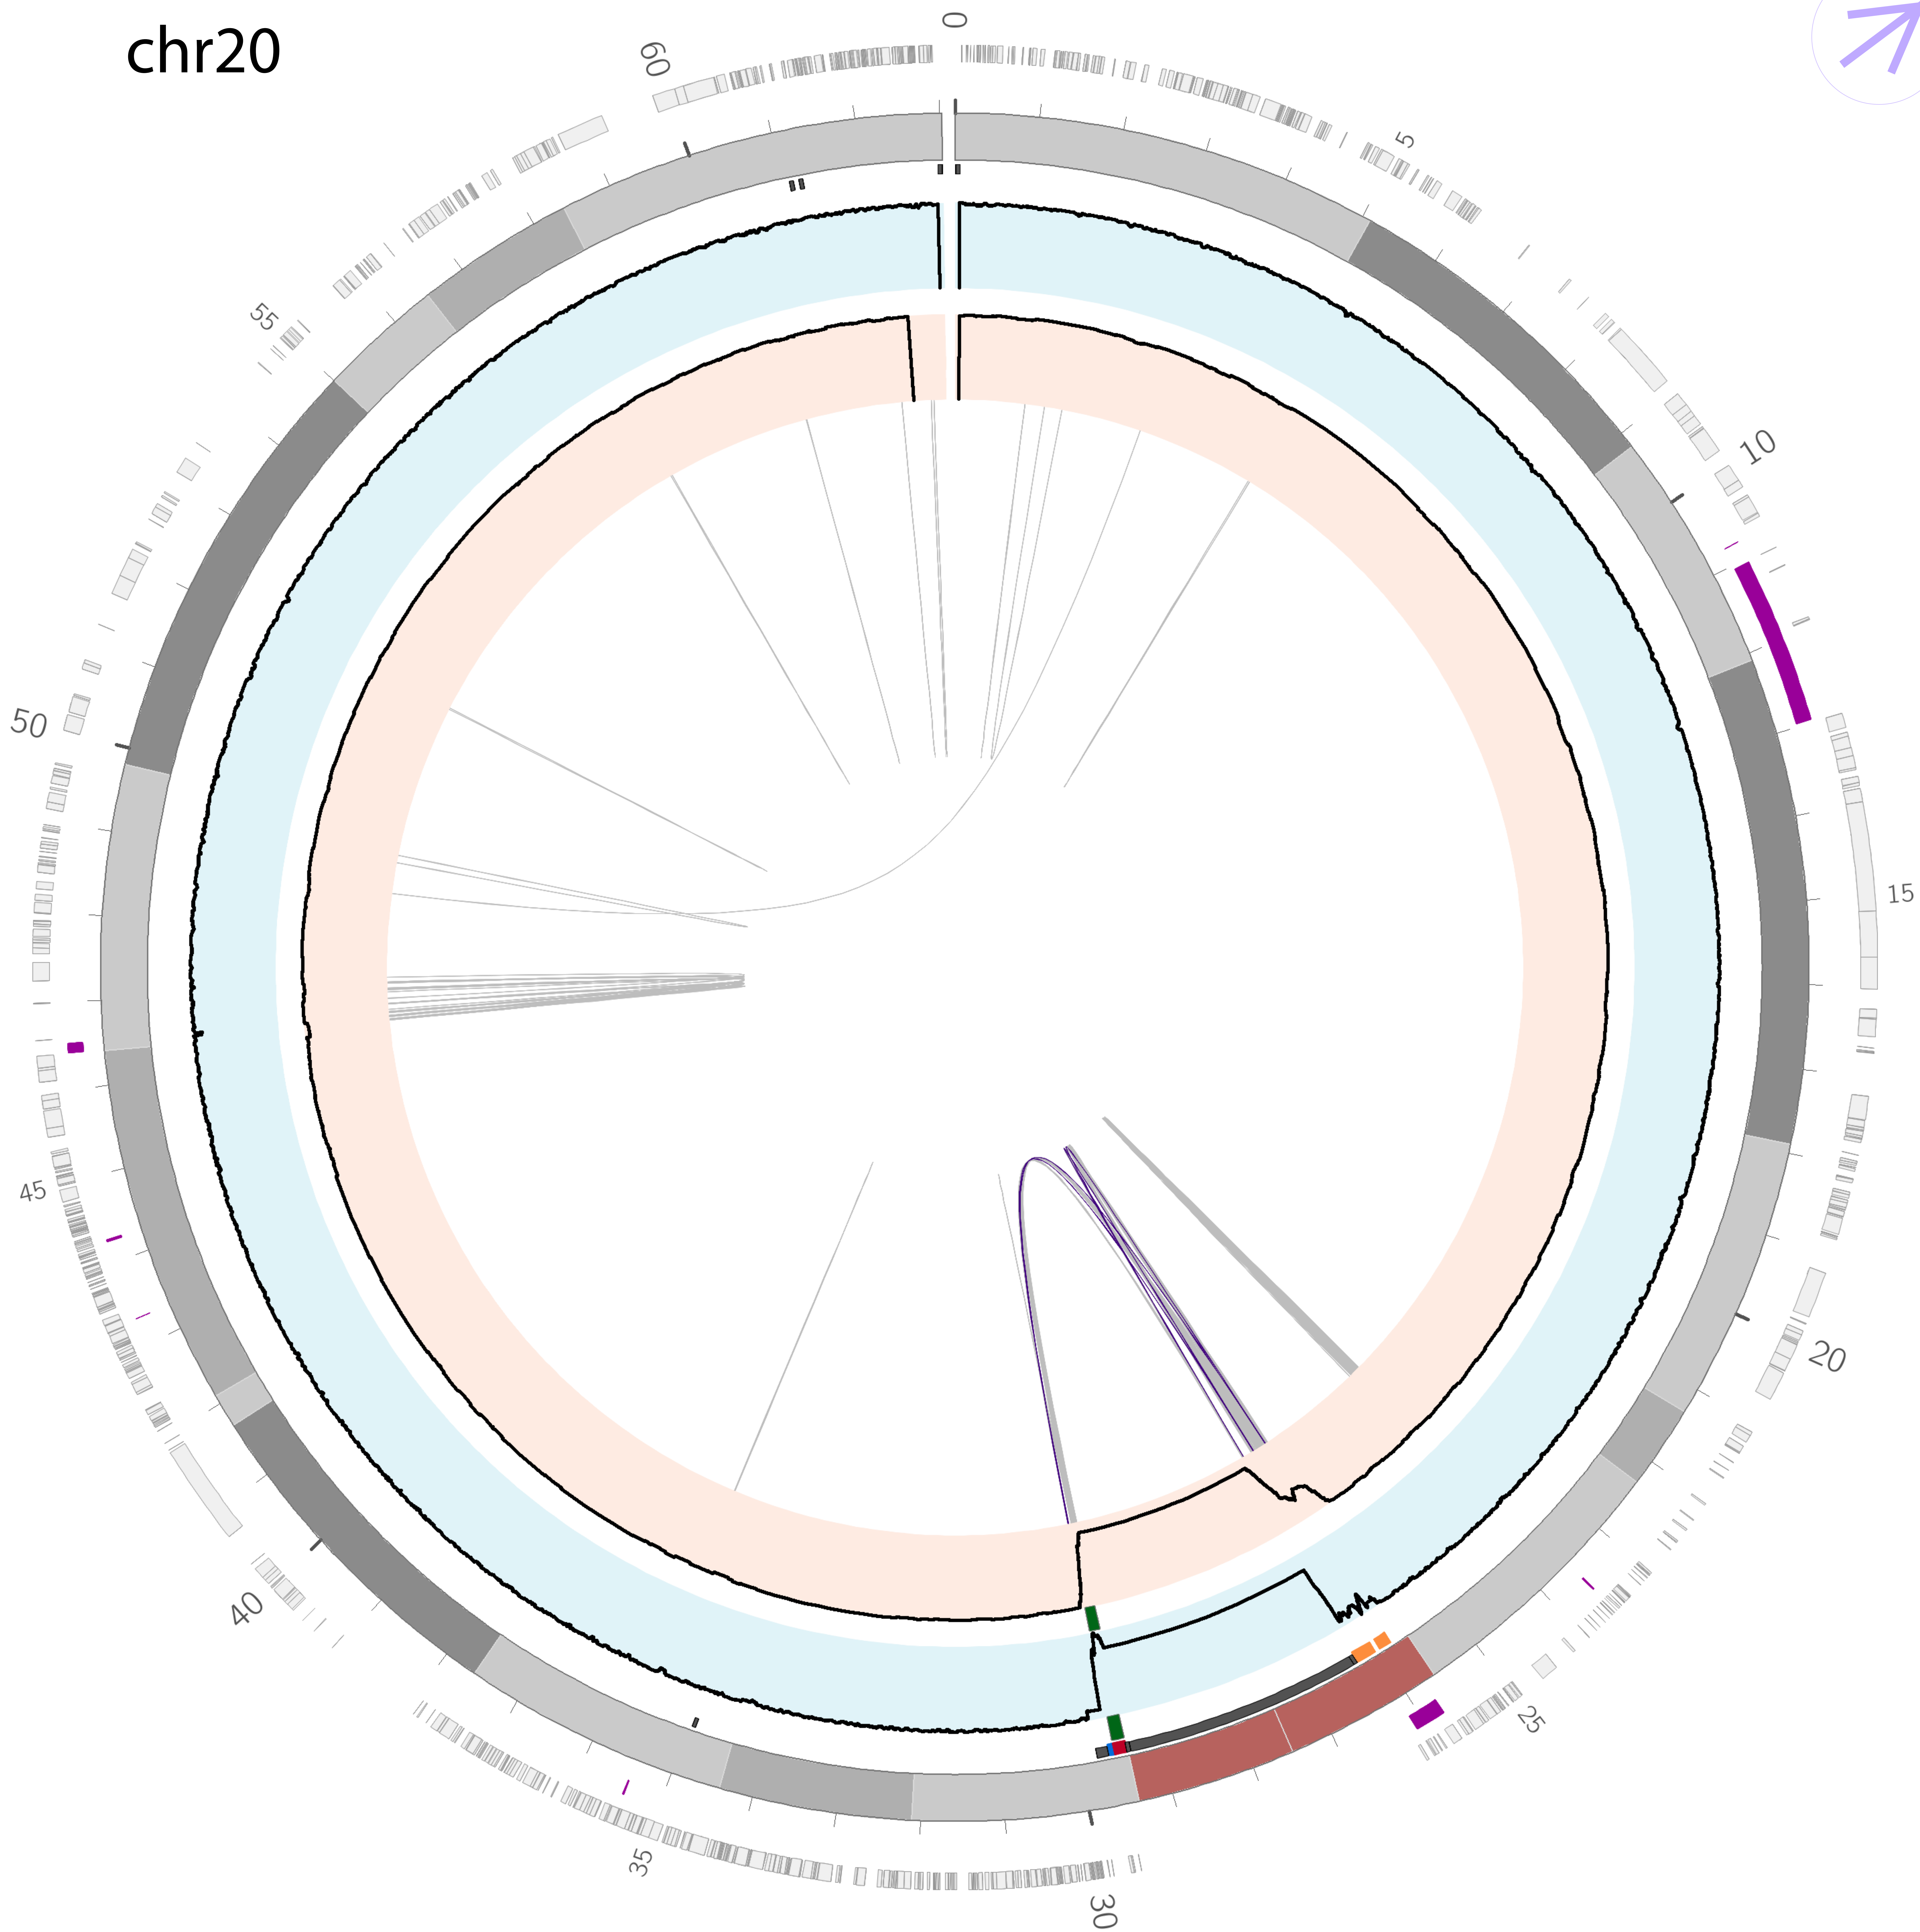



chr21

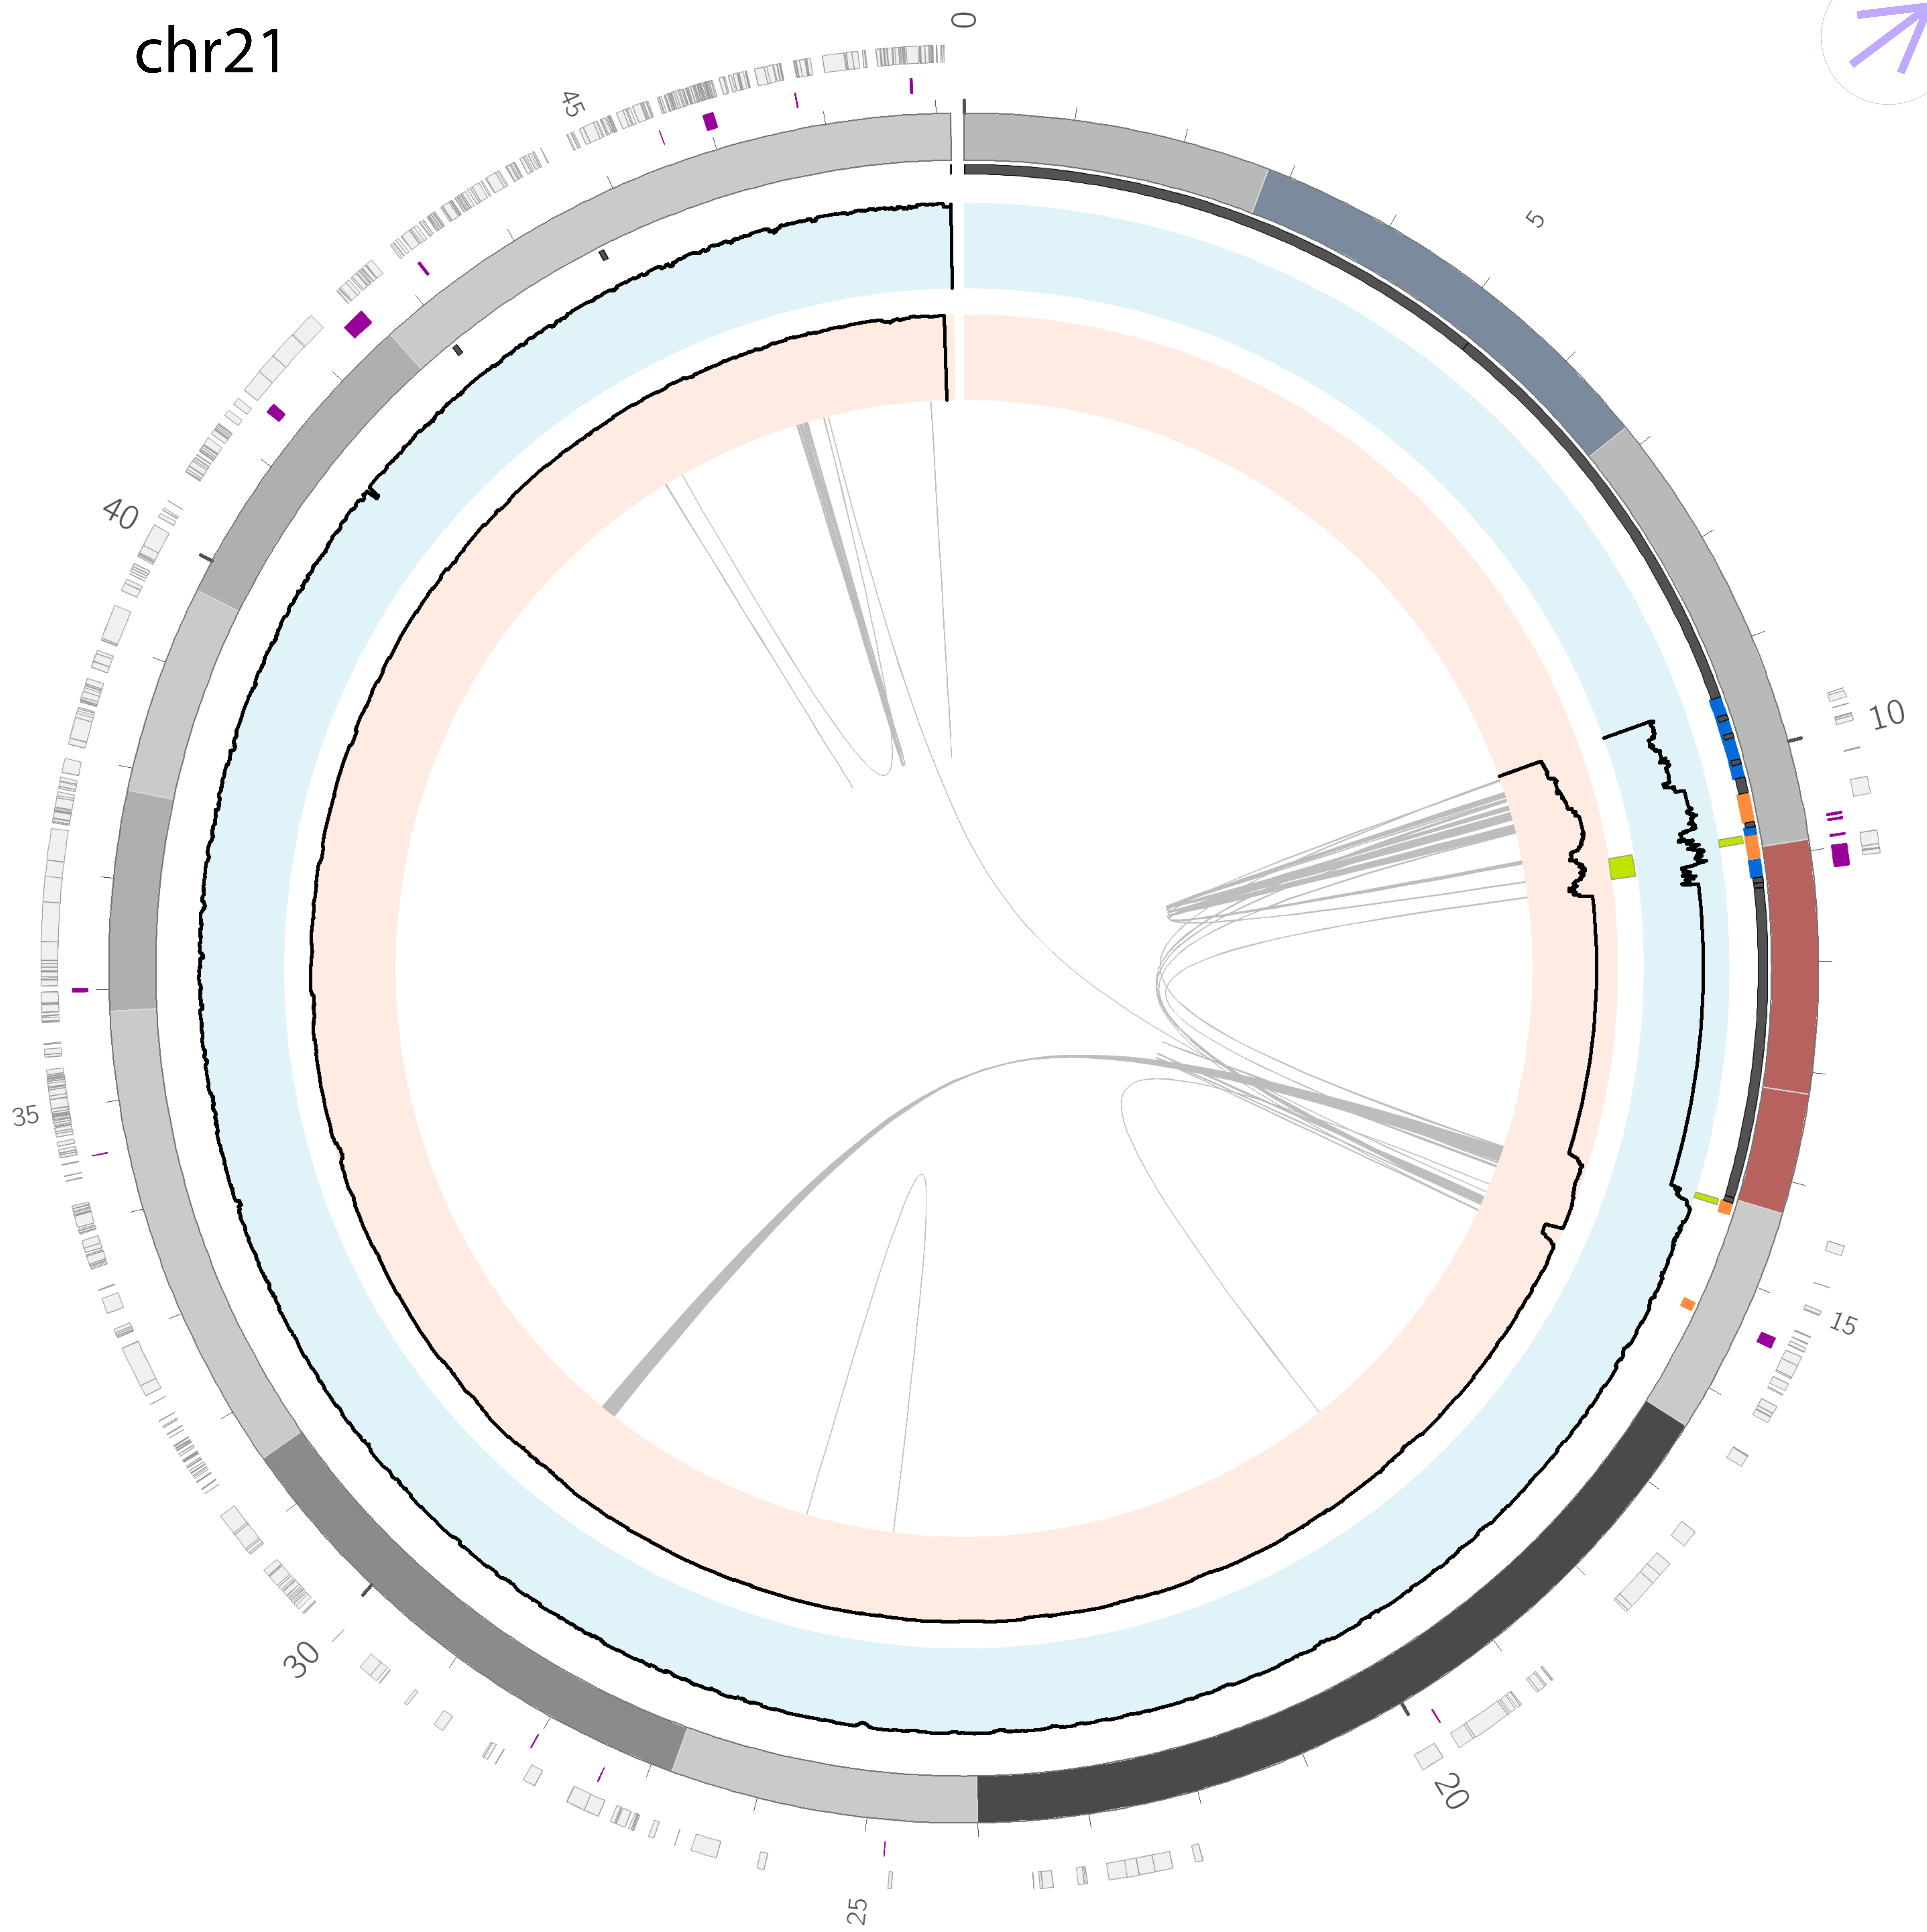



chr22

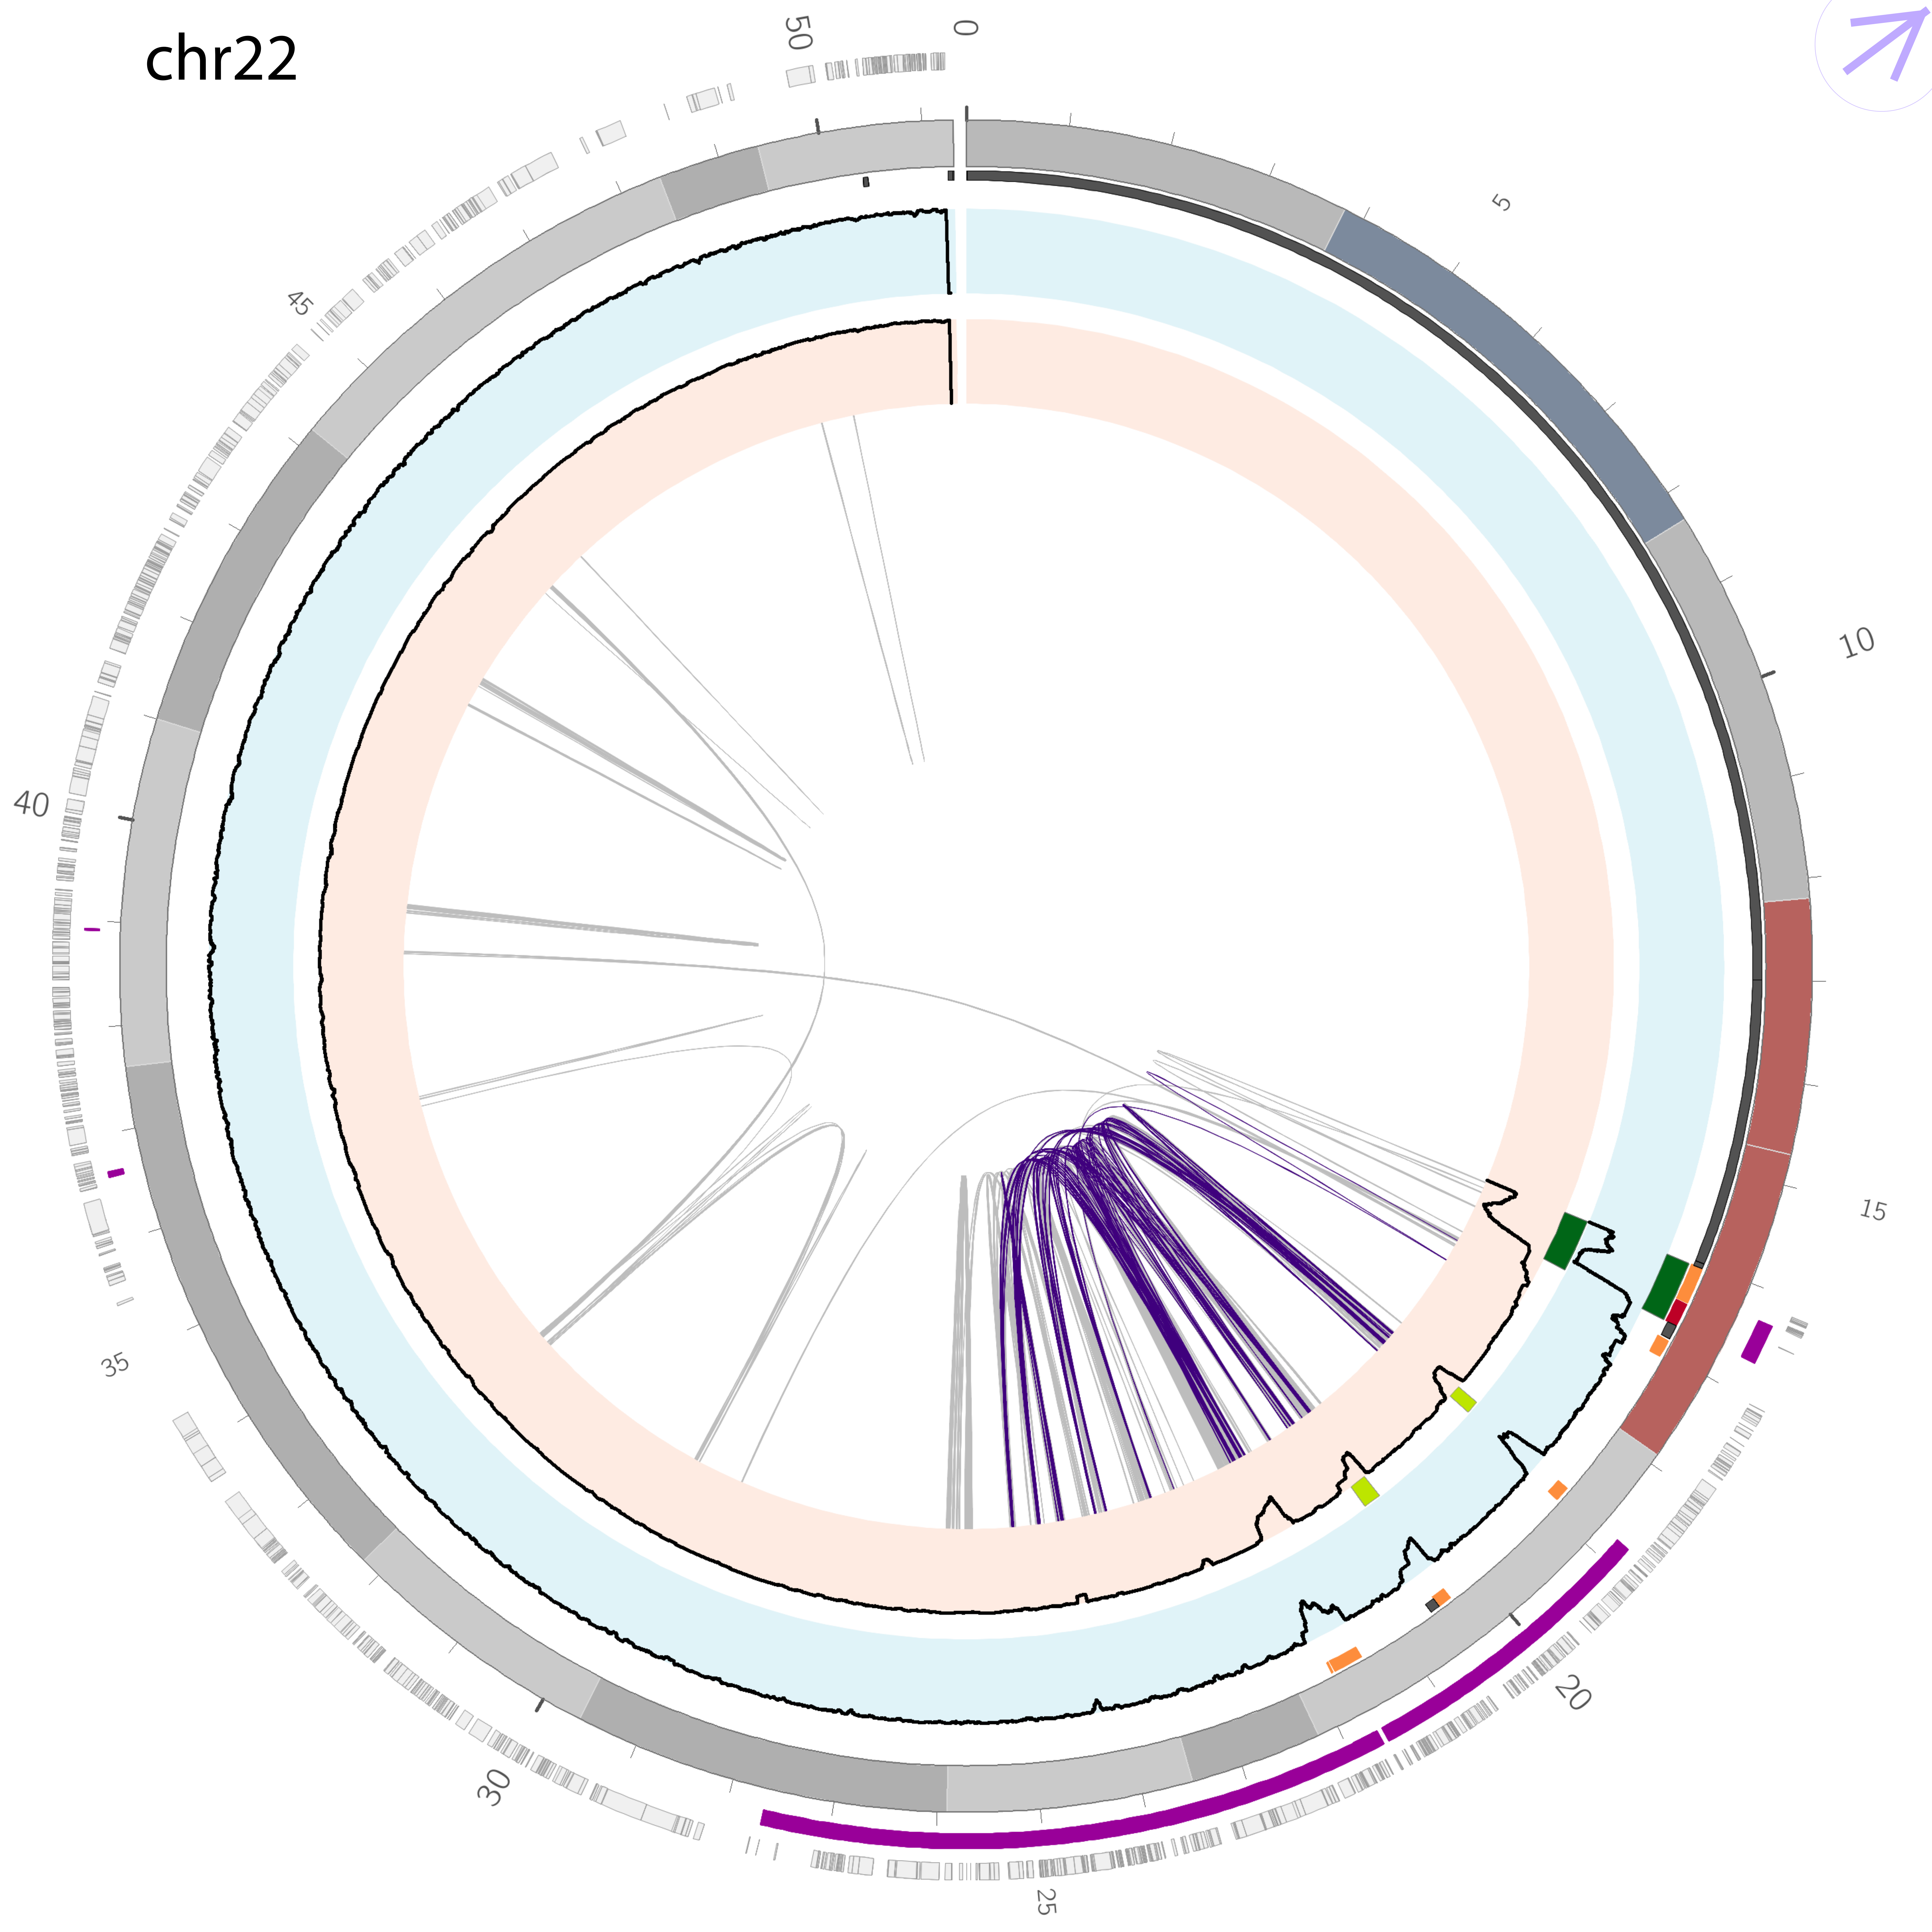



chrX

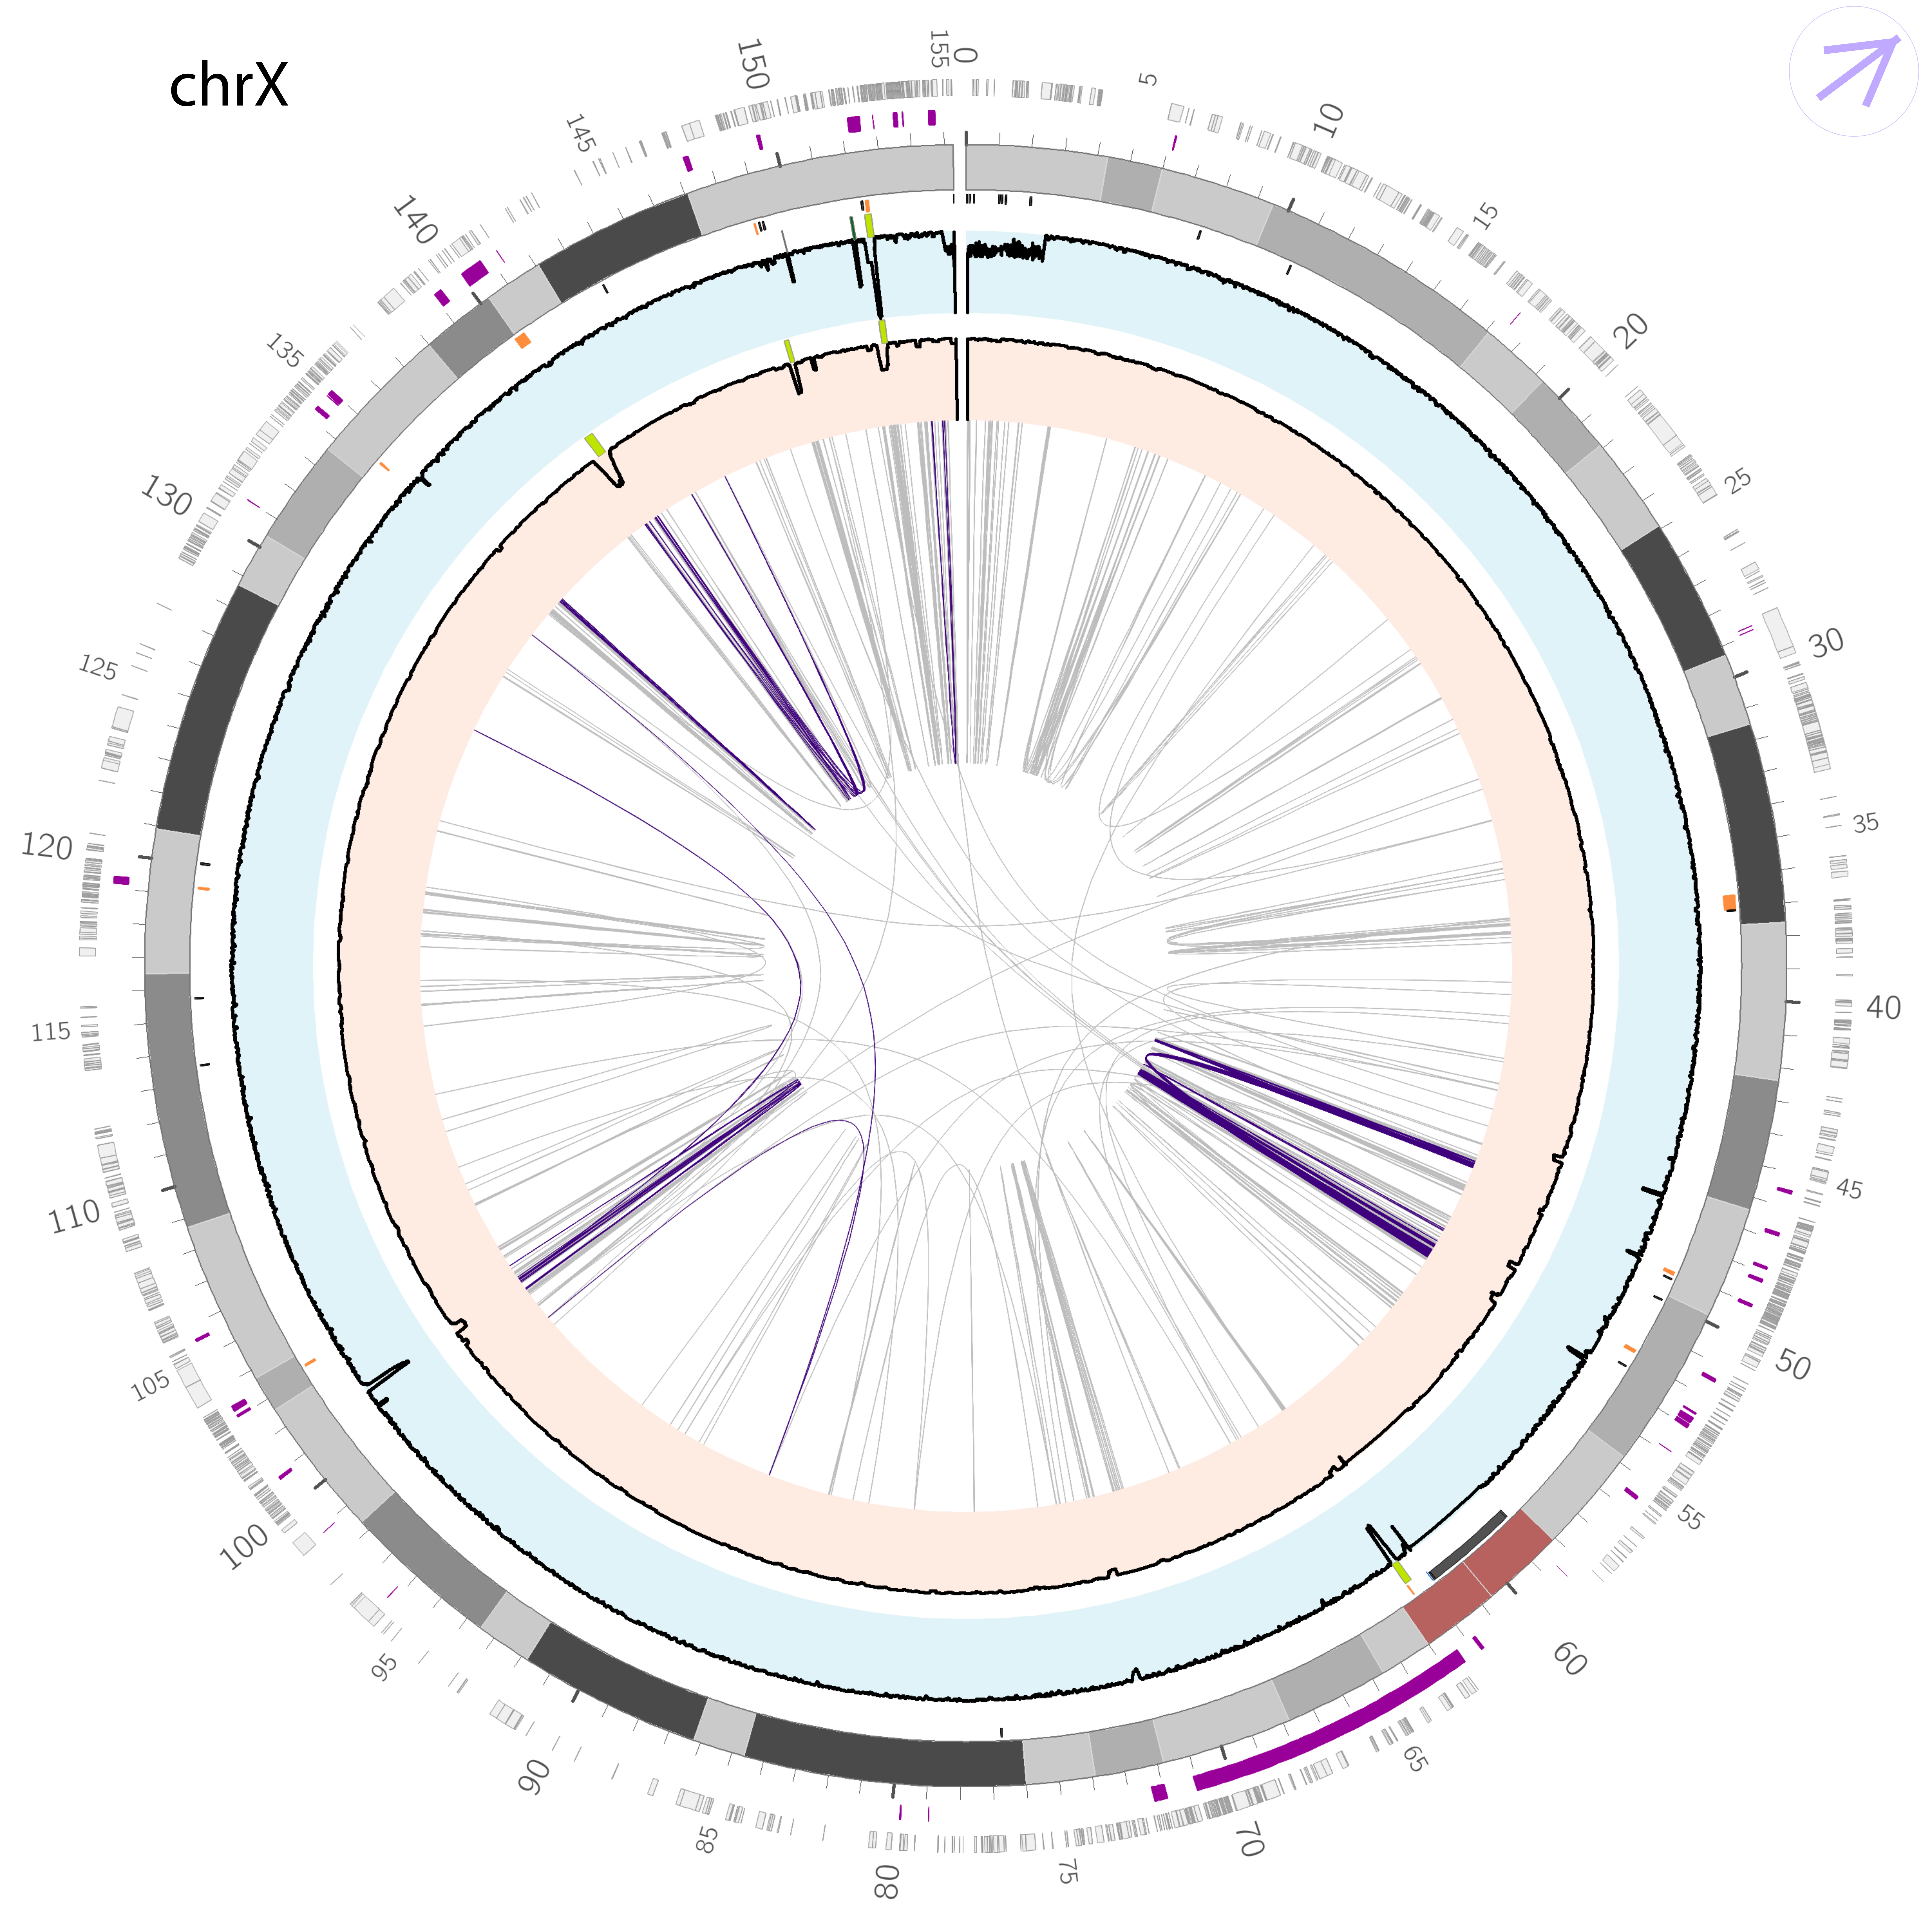



chrY

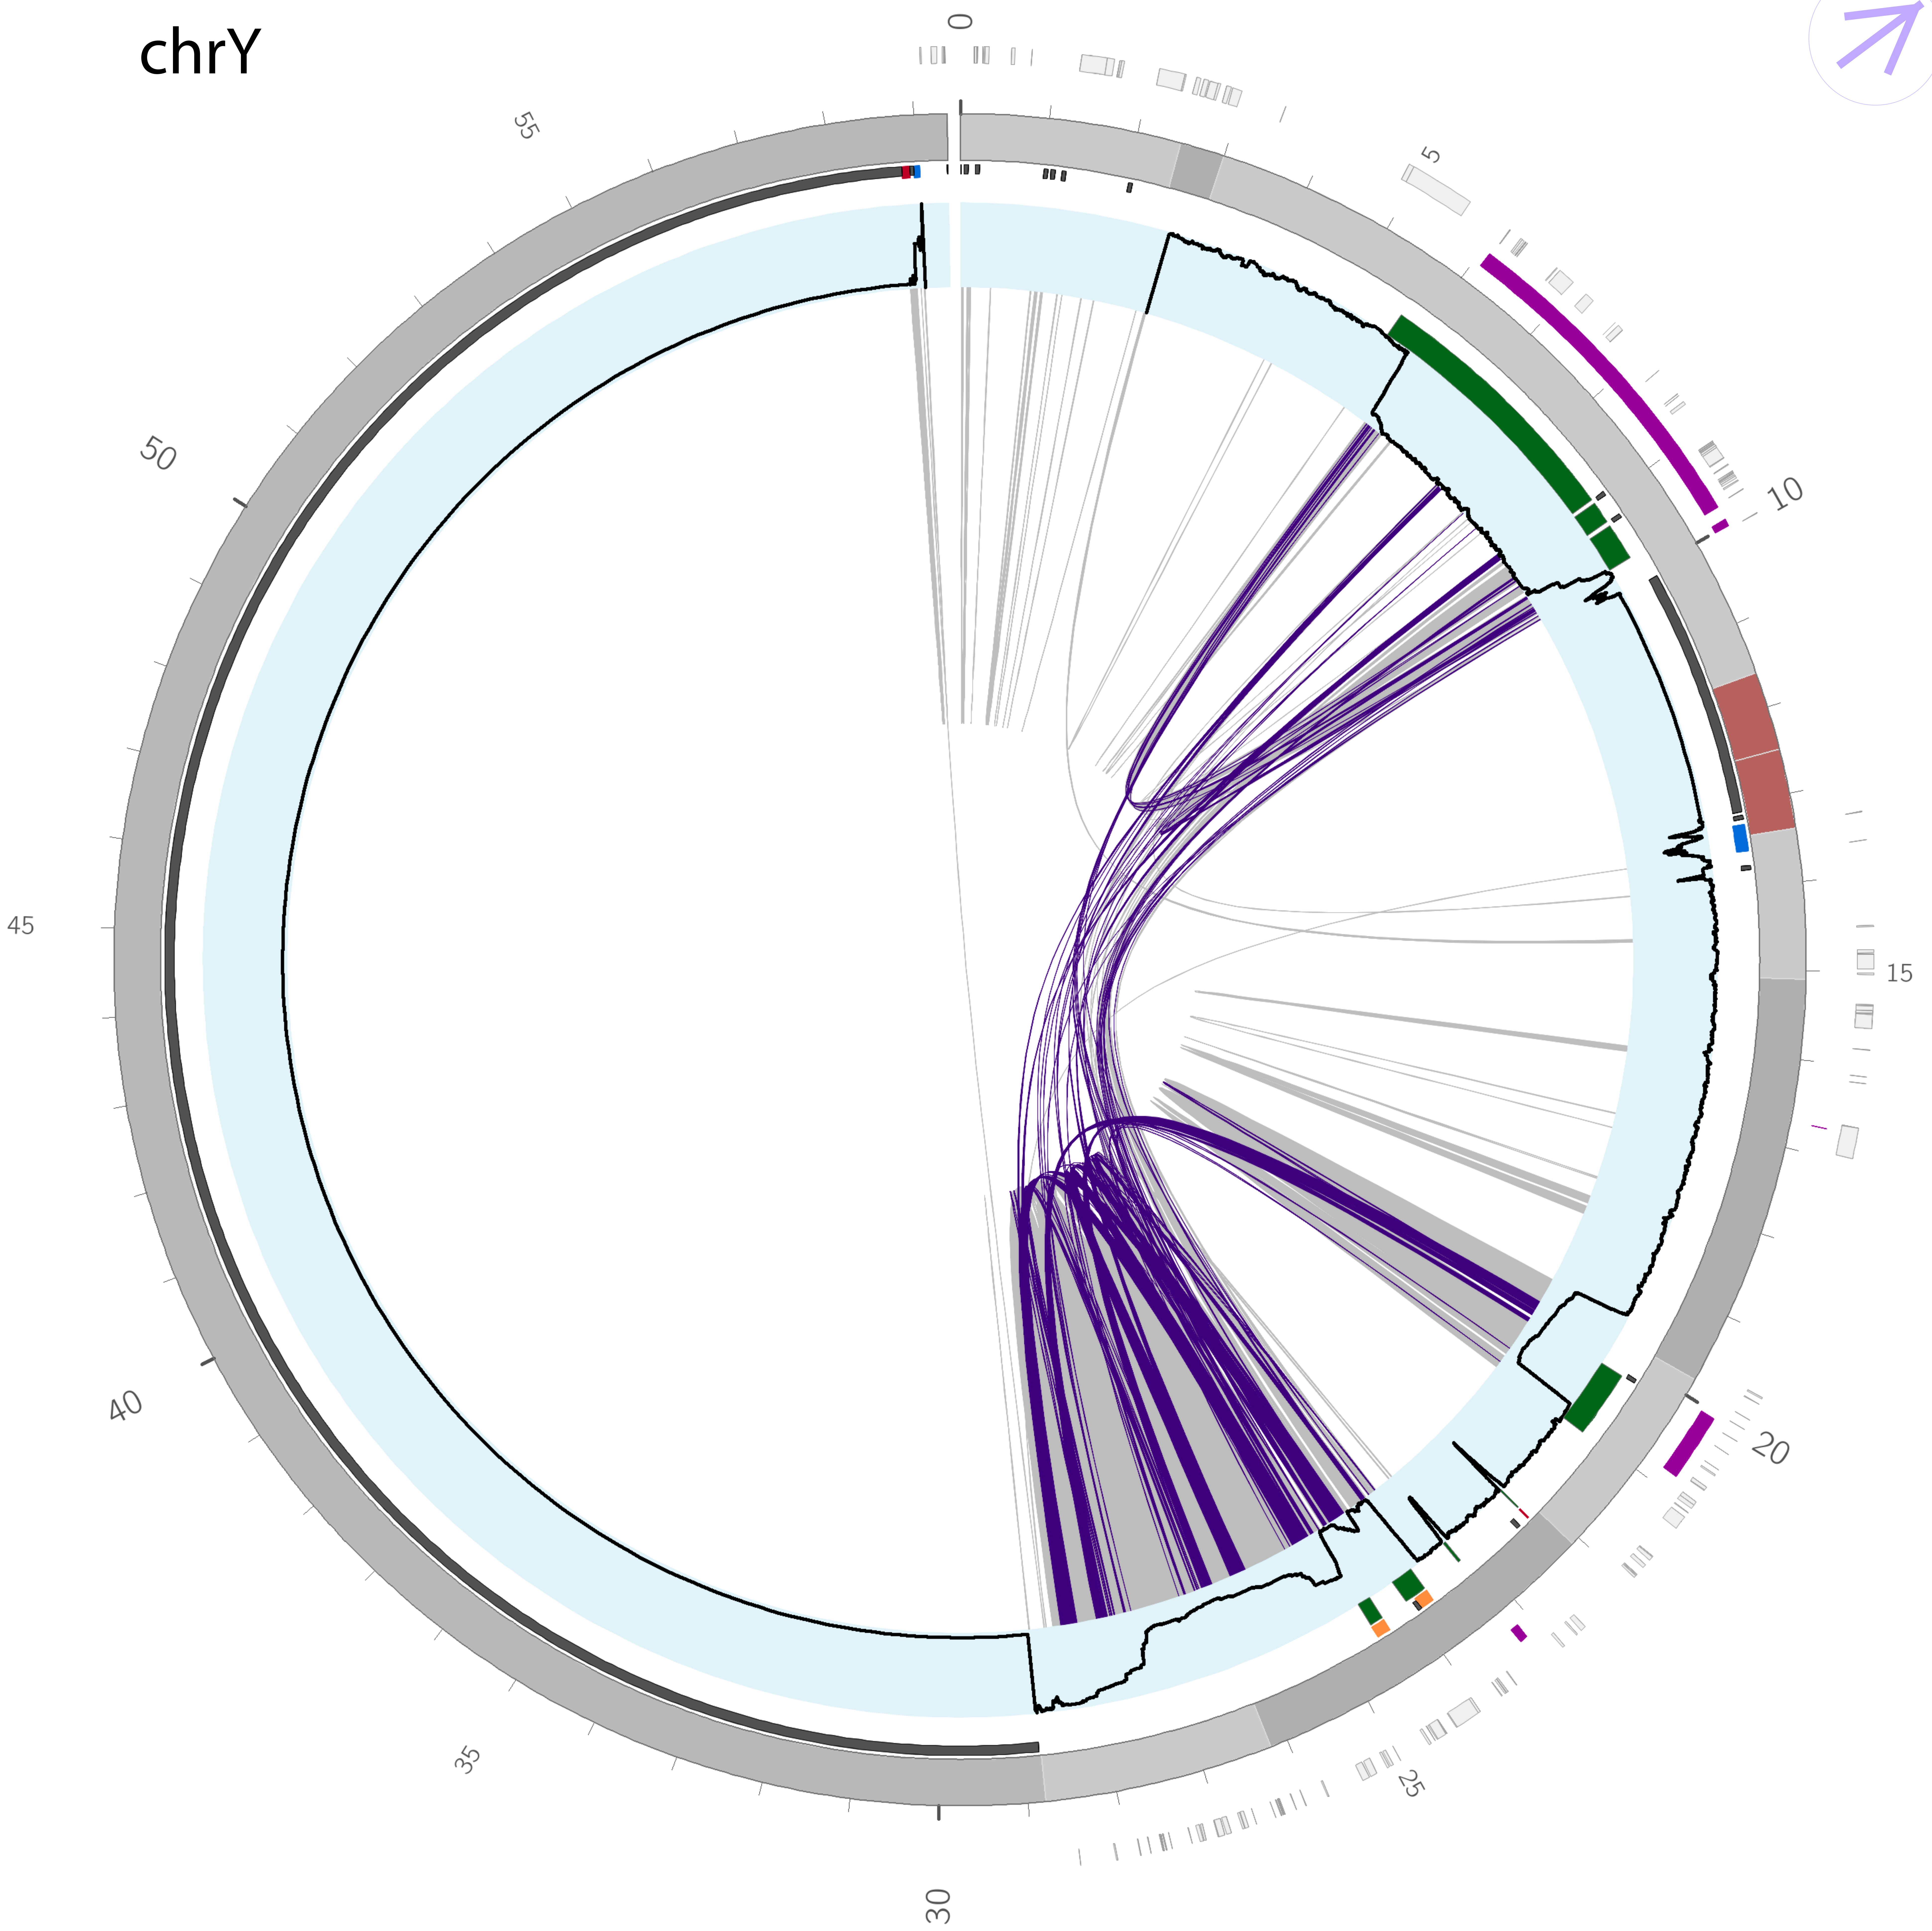

Supplement: supp_gr.201160.115_Supplemental_Data_File_S1.pdf [file supp_gr.201160.115_Supplemental_Data_File_S1.pdf]
