# Supplementary material for: Characterizing polymorphic inversions in human genomes by single-cell sequencing
Source: PubMed Central journal article supplement — Genome Res. 2016 Nov;26(11):1575–87. doi: 10.1101/gr.201160.115 (PMC5088599; doi:10.1101/gr.201160.115), 2016-11

# Genomic architecture of mapped inversions

Key:

Inversions shown on plot  
 Dotplot of **mBM.4.2, fCB.4.2** on chr4  
 (Dataset.chrNo.invNo) (chromosome)

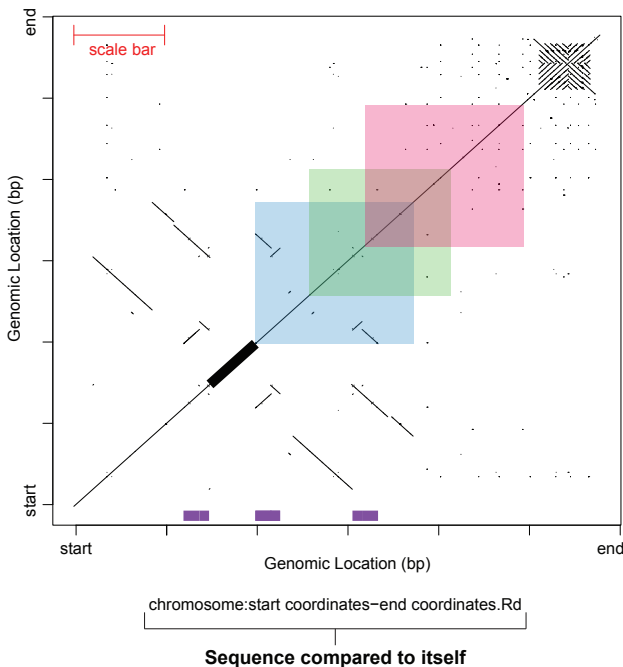

Datasets included:

- Newborn female invertome female cord blood (fCB)
- Adult male invertome male bone marrow (mBM)
- Population polymorphisms pooled cord blood (ROIno)

Genomic Features:

- Repetitive elements
- Non-palindromic repeats
- Palindromic repeats
- Reference assembly gaps
- Database of Genomic Variants (DGV) inversions

Colour Key of Overlaps:

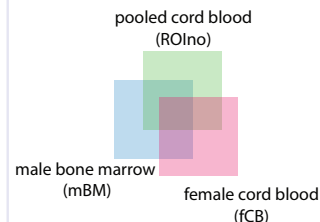

## Supplemental Data File S2: Genomic architecture of mapped inversions

To visualize the genomic architecture of inversions a self-alignment was performed for all unique (137) genomic regions found to contain inversions in all datasets (see Methods). The mapped inversions are depicted for each region for the adult male inversion profile (mBM; blue), newborn female inversion profile (fCB; pink) and pooled donor population (ROIno; green). See Supplemental Tables 3-5 for inversion coordinates. The dot plots reveal the presence and location of many genomic features, including highly repetitive elements, palindromic and non-palindromic segmental duplications (as denoted in the key). Inversions listed in the Database of Genomic Variants (DGV) are plotted on both the x-axis and y-axis (purple). Reference assembly gaps are shown on the horizontal axis (black bars). Scale bars are shown in top left corners of individual plots (red).

Dotplot of mBM.1.1, ROIno.1.1 on chr1

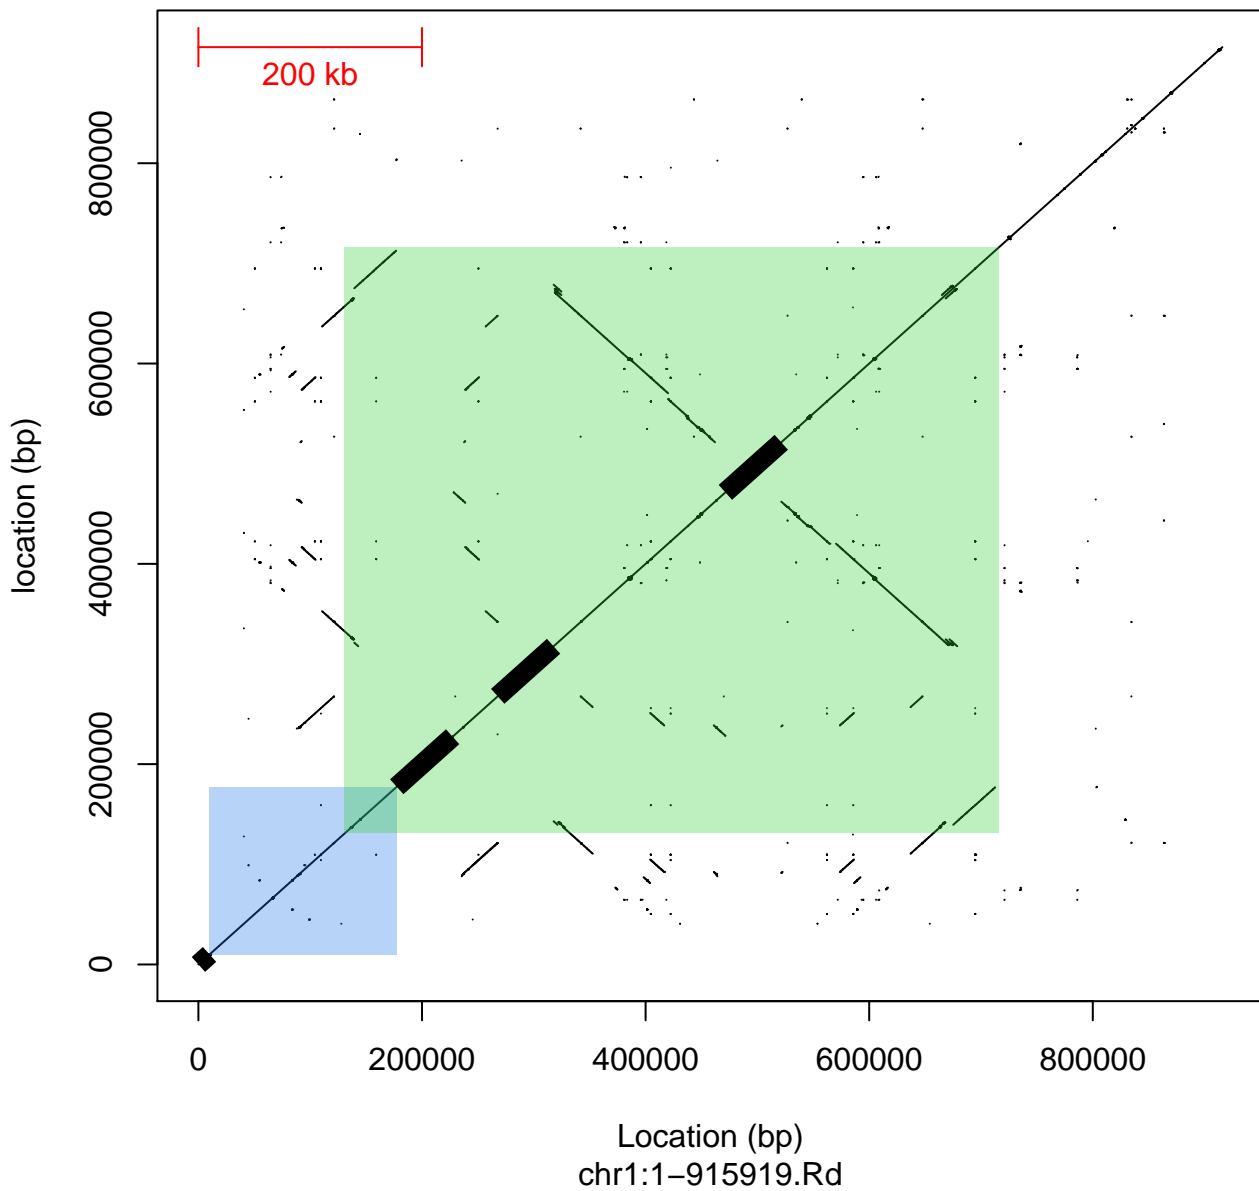

# Dotplot of mBM.1.2 on chr1

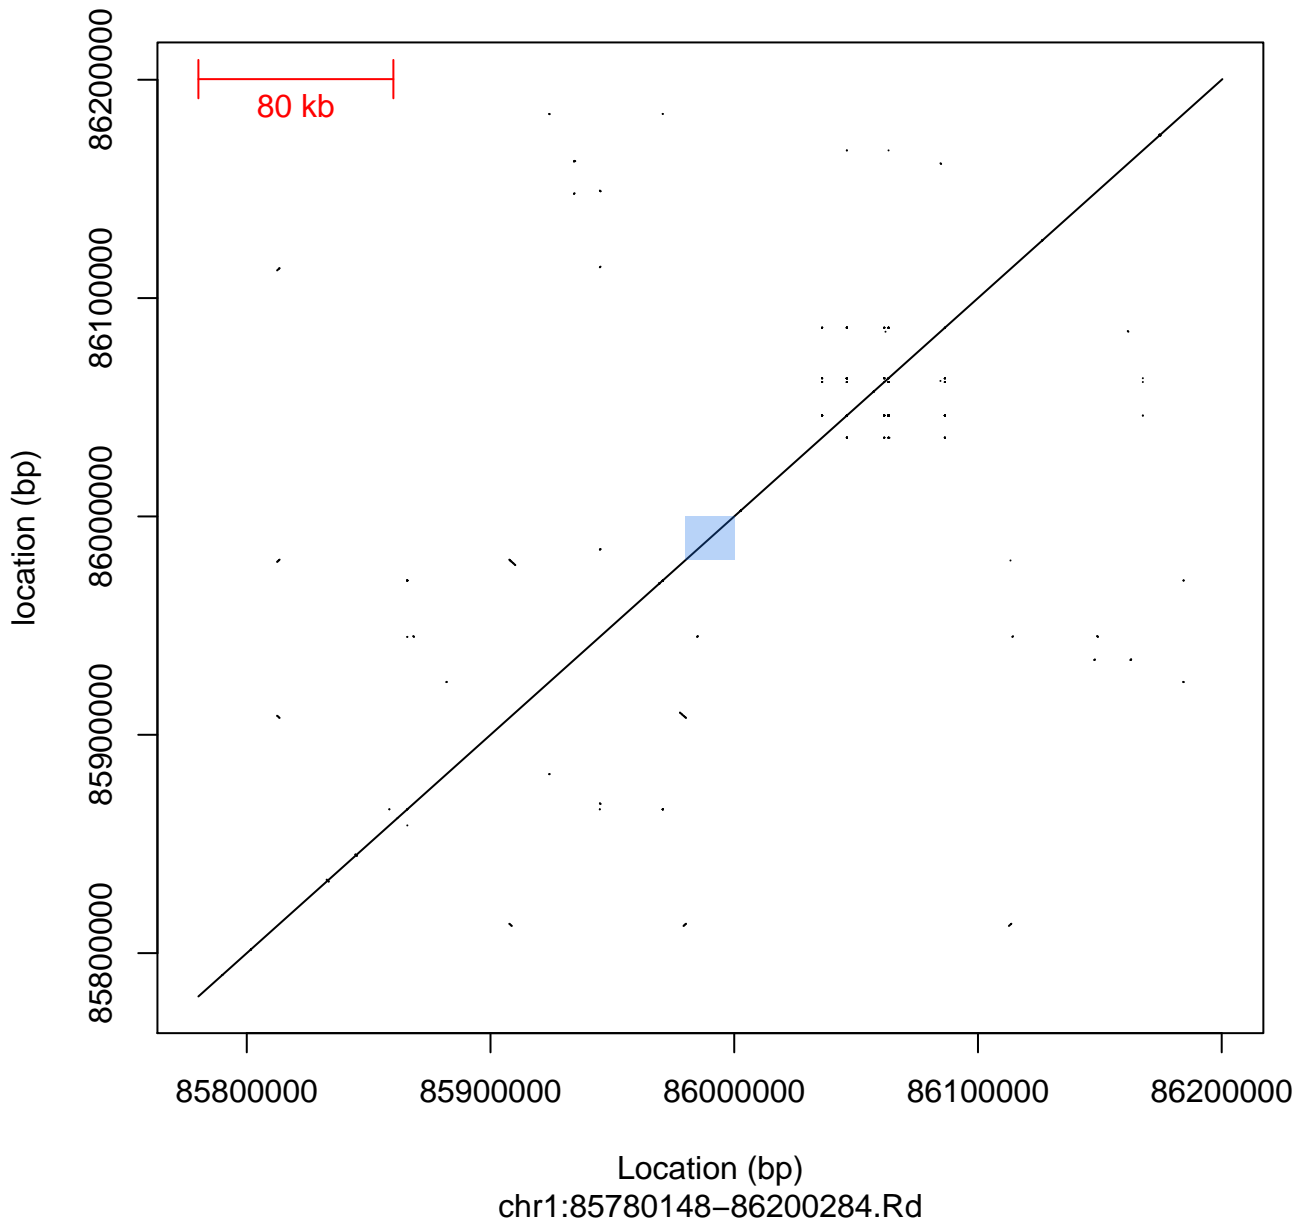

# Dotplot of ROIno.1.5 on chr1

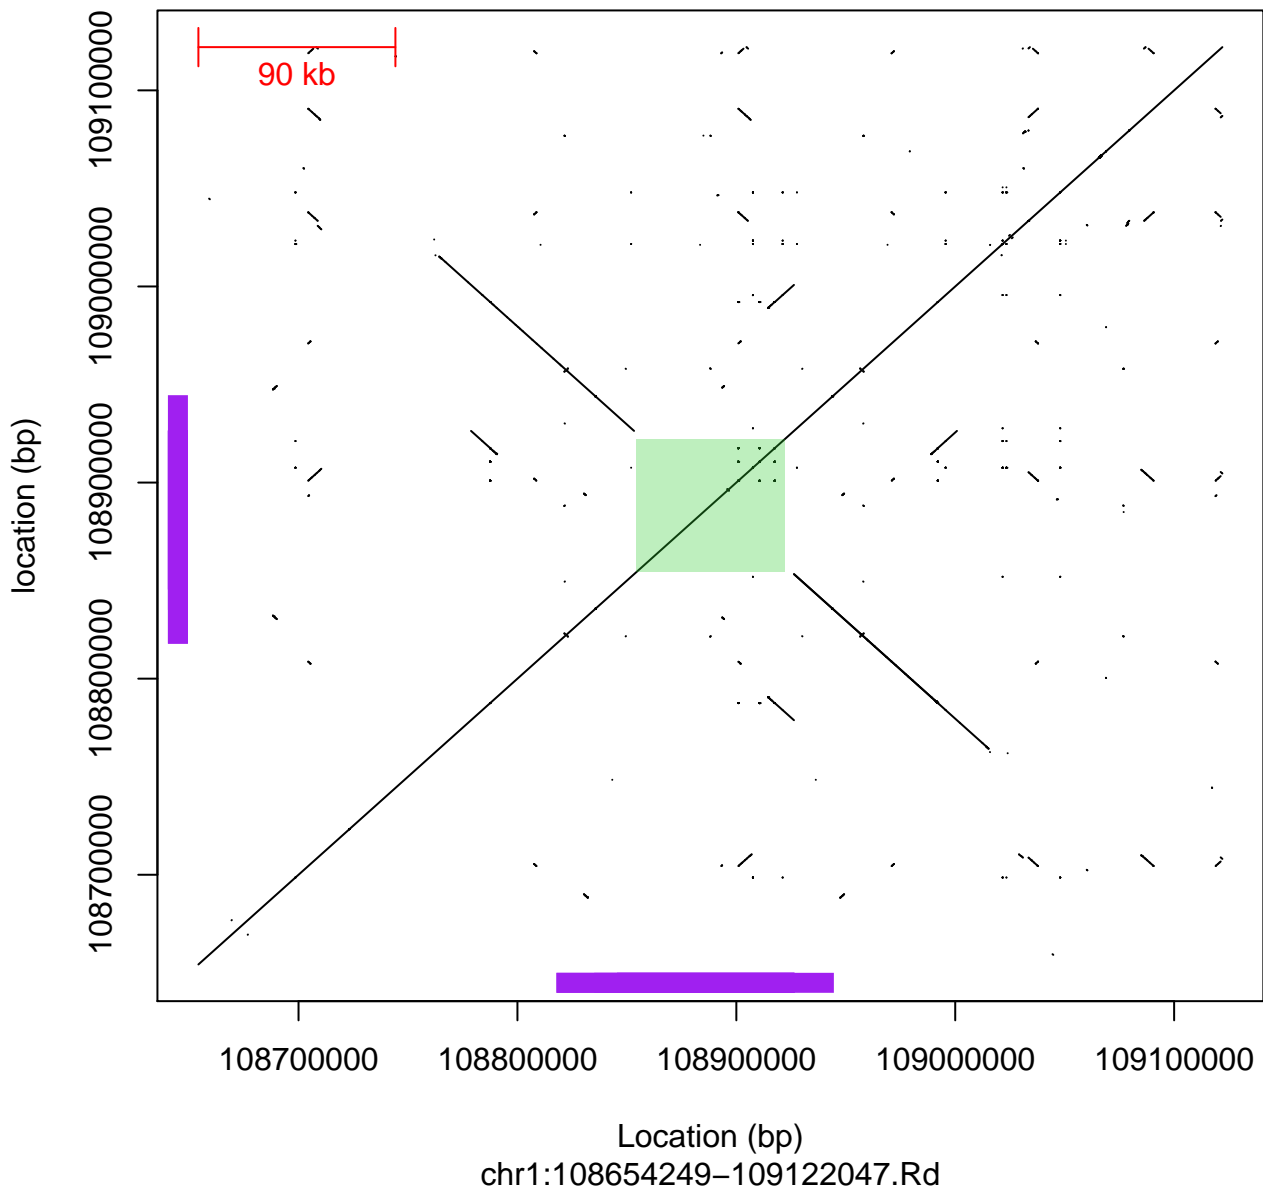

# Dotplot of mBM.1.3, fCB.1.1 on chr1

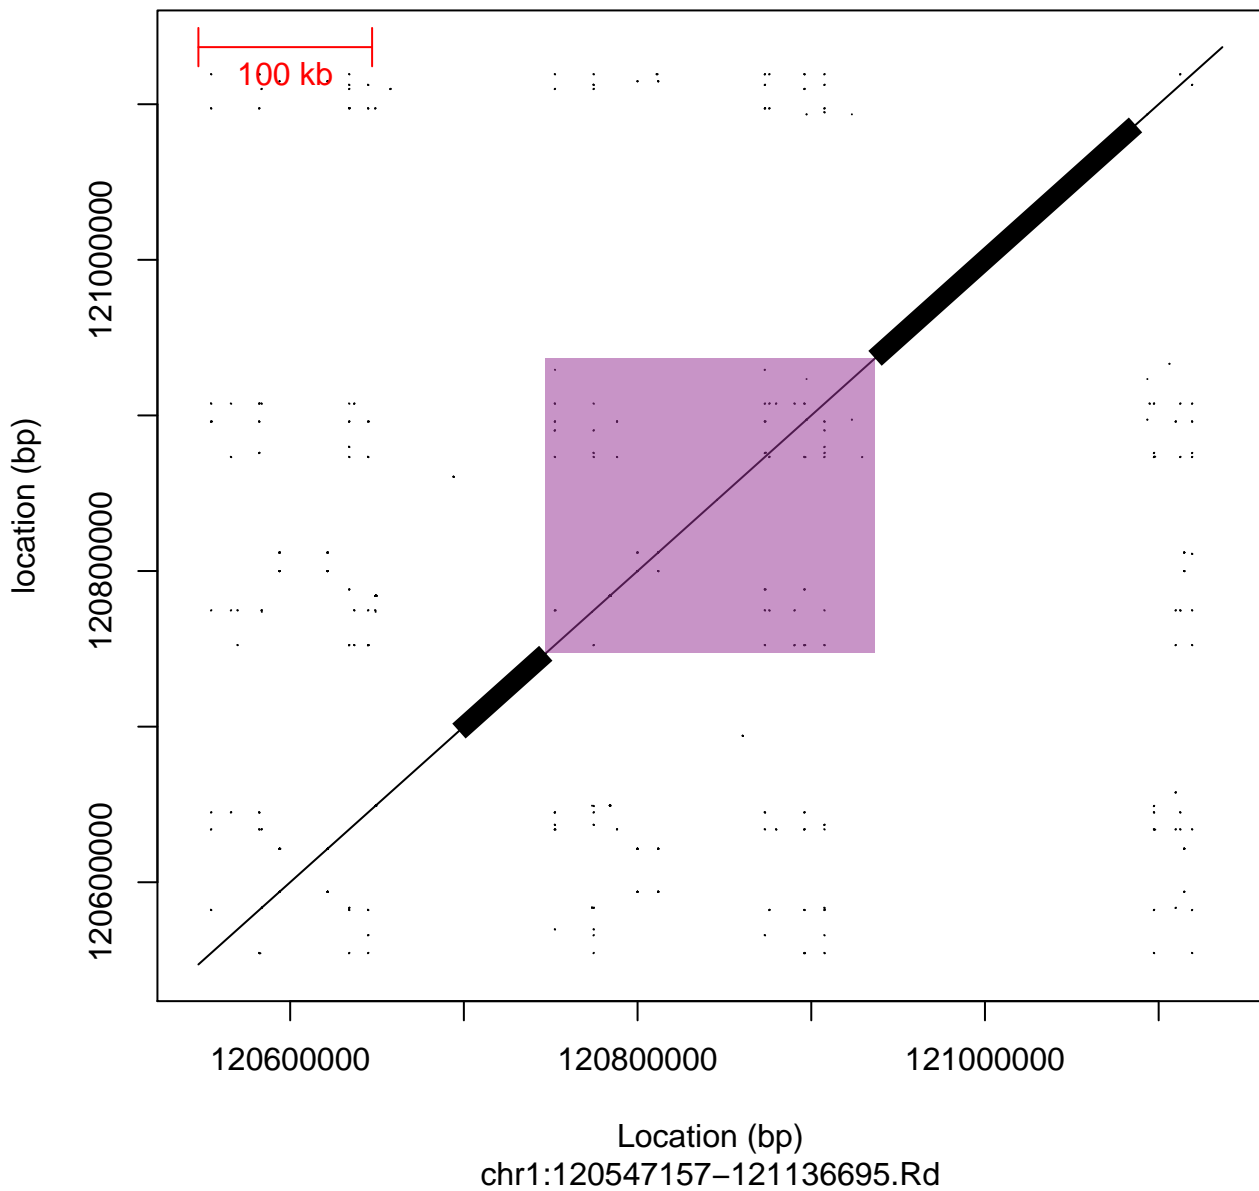

Dotplot of mBM.1.4, fCB.1.2 on chr1

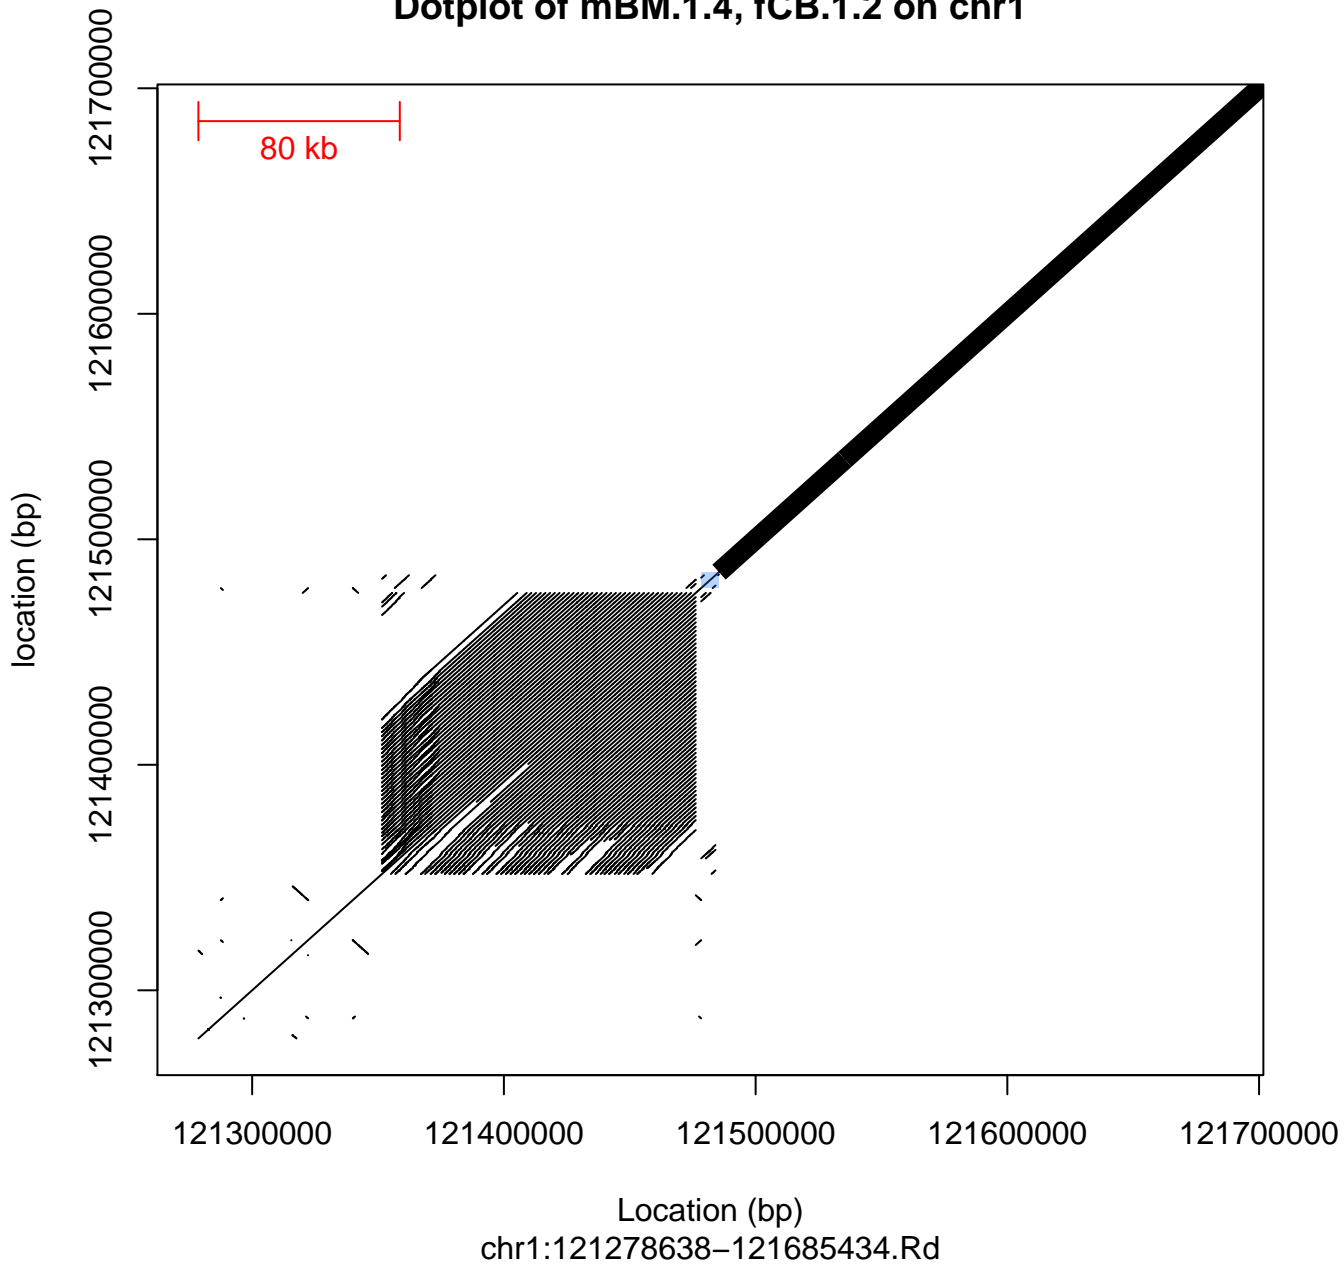

# Dotplot of mBM.1.5 on chr1

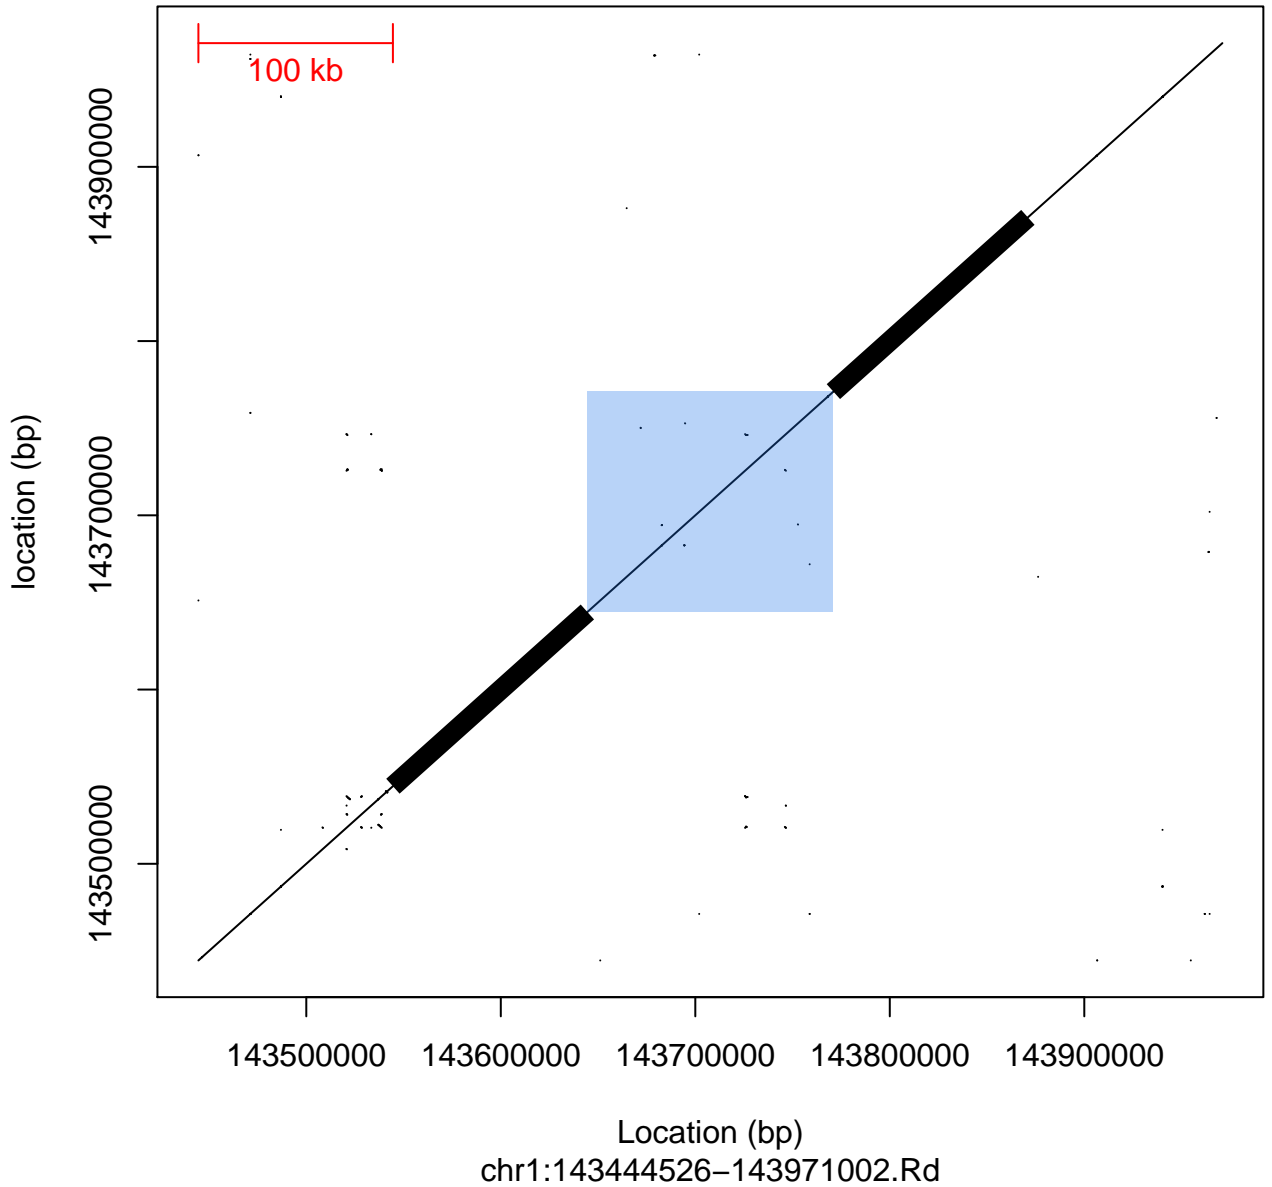

# Dotplot of mBM.1.6, fCB.1.3 on chr1

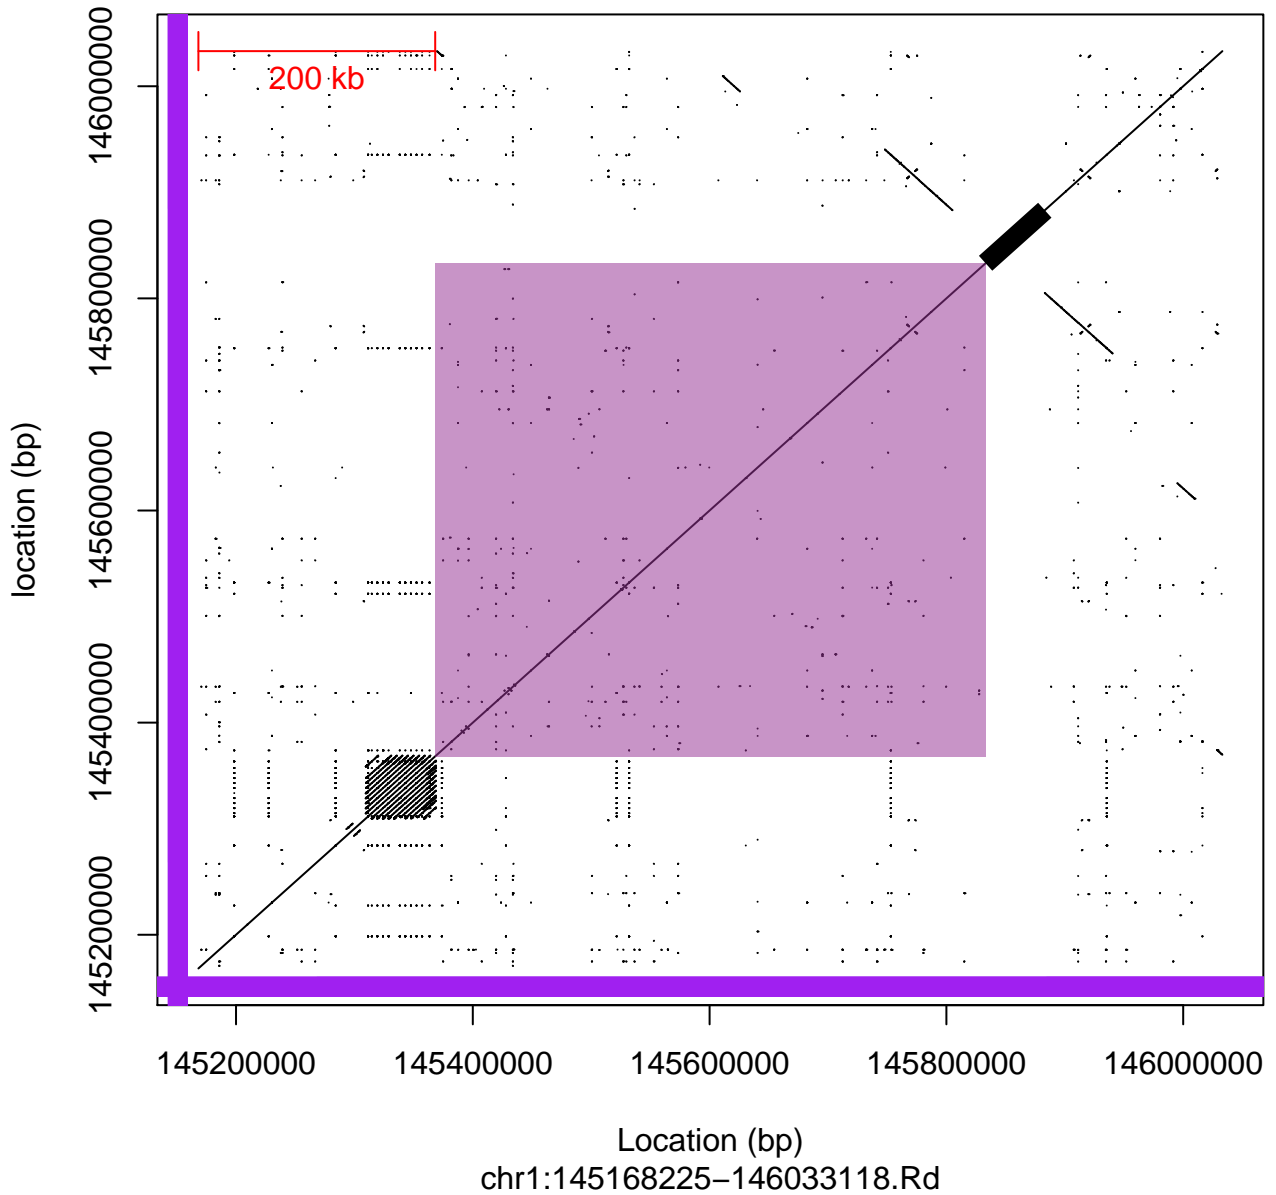



# Dotplot of mBM.1.7, fCB.1.4 on chr1

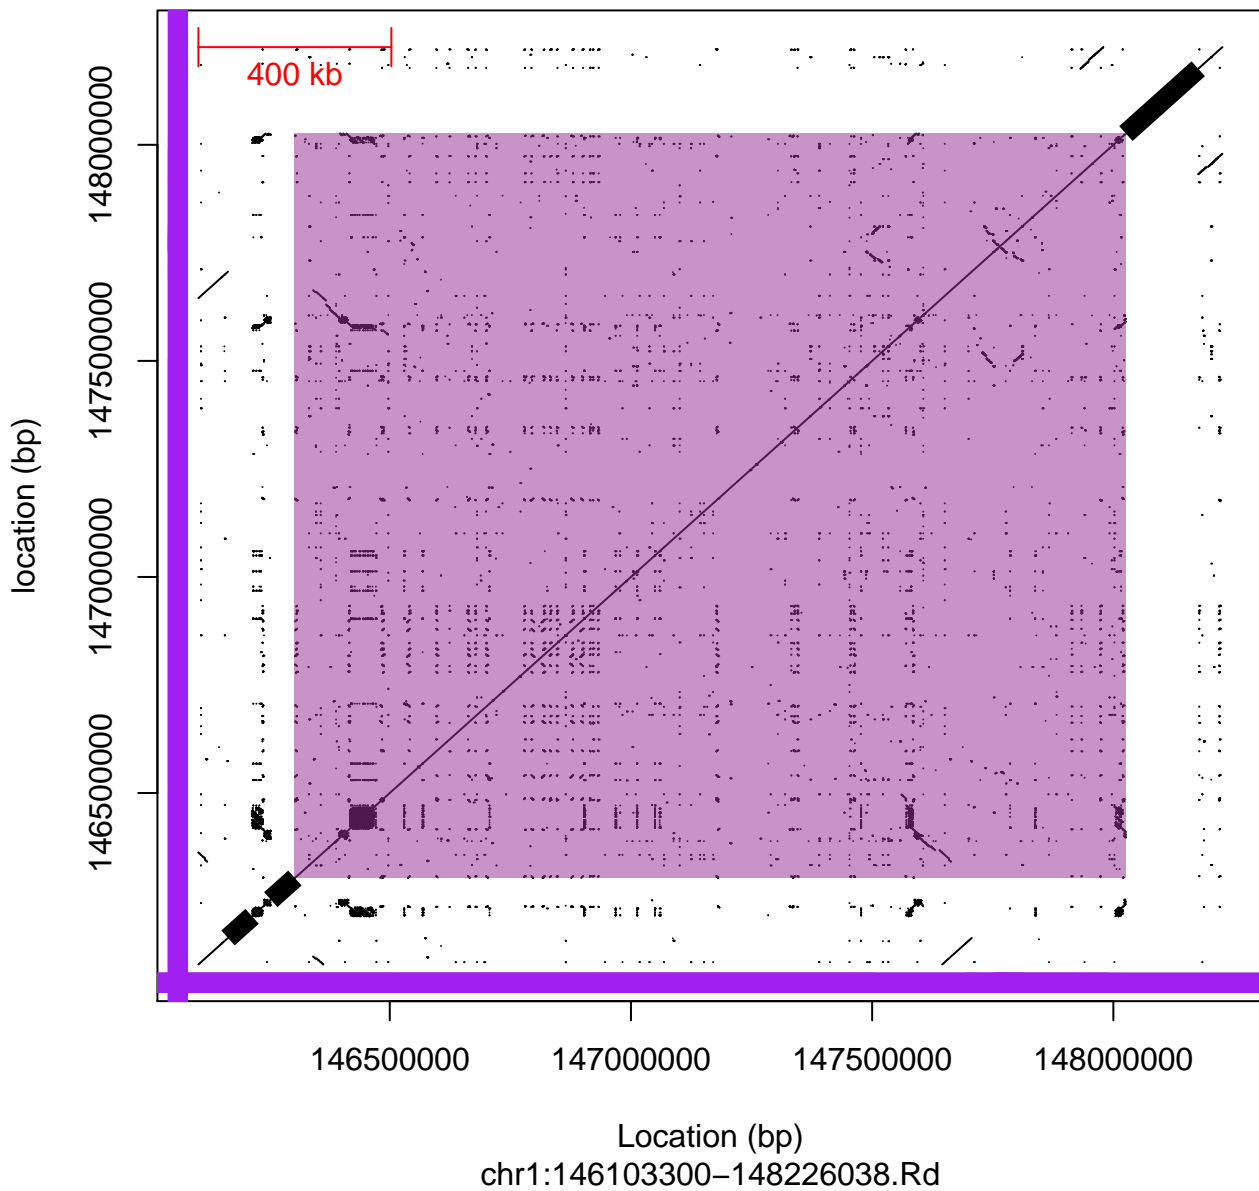

# Dotplot of ROIno.1.15 on chr1

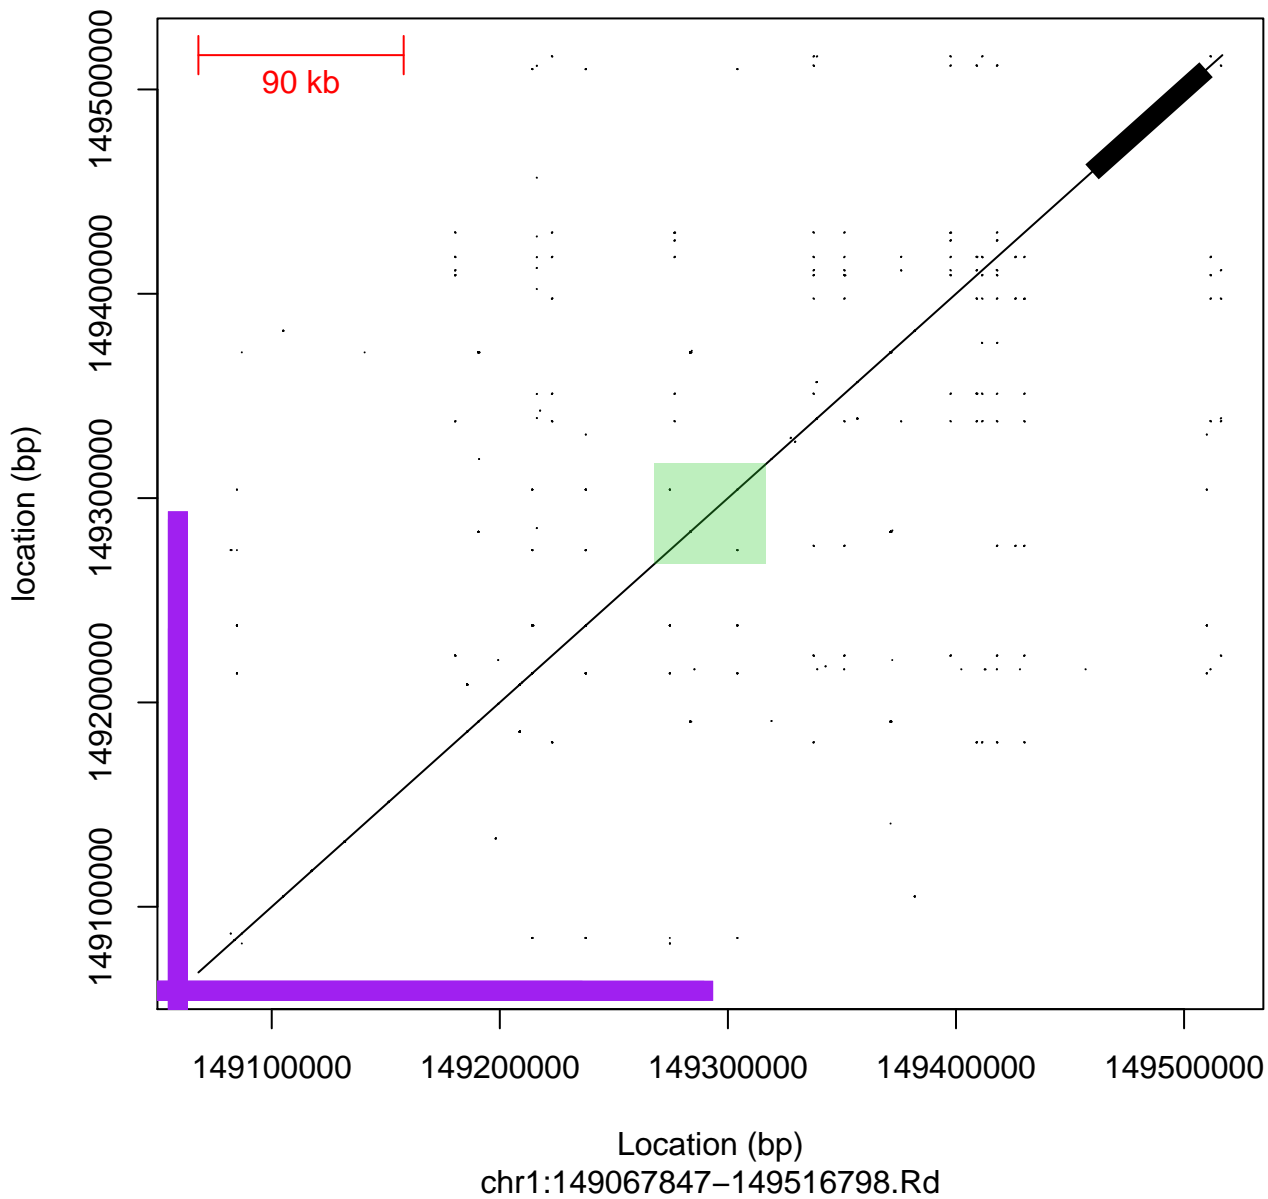

# Dotplot of mBM.1.8, fCB.1.5 on chr1

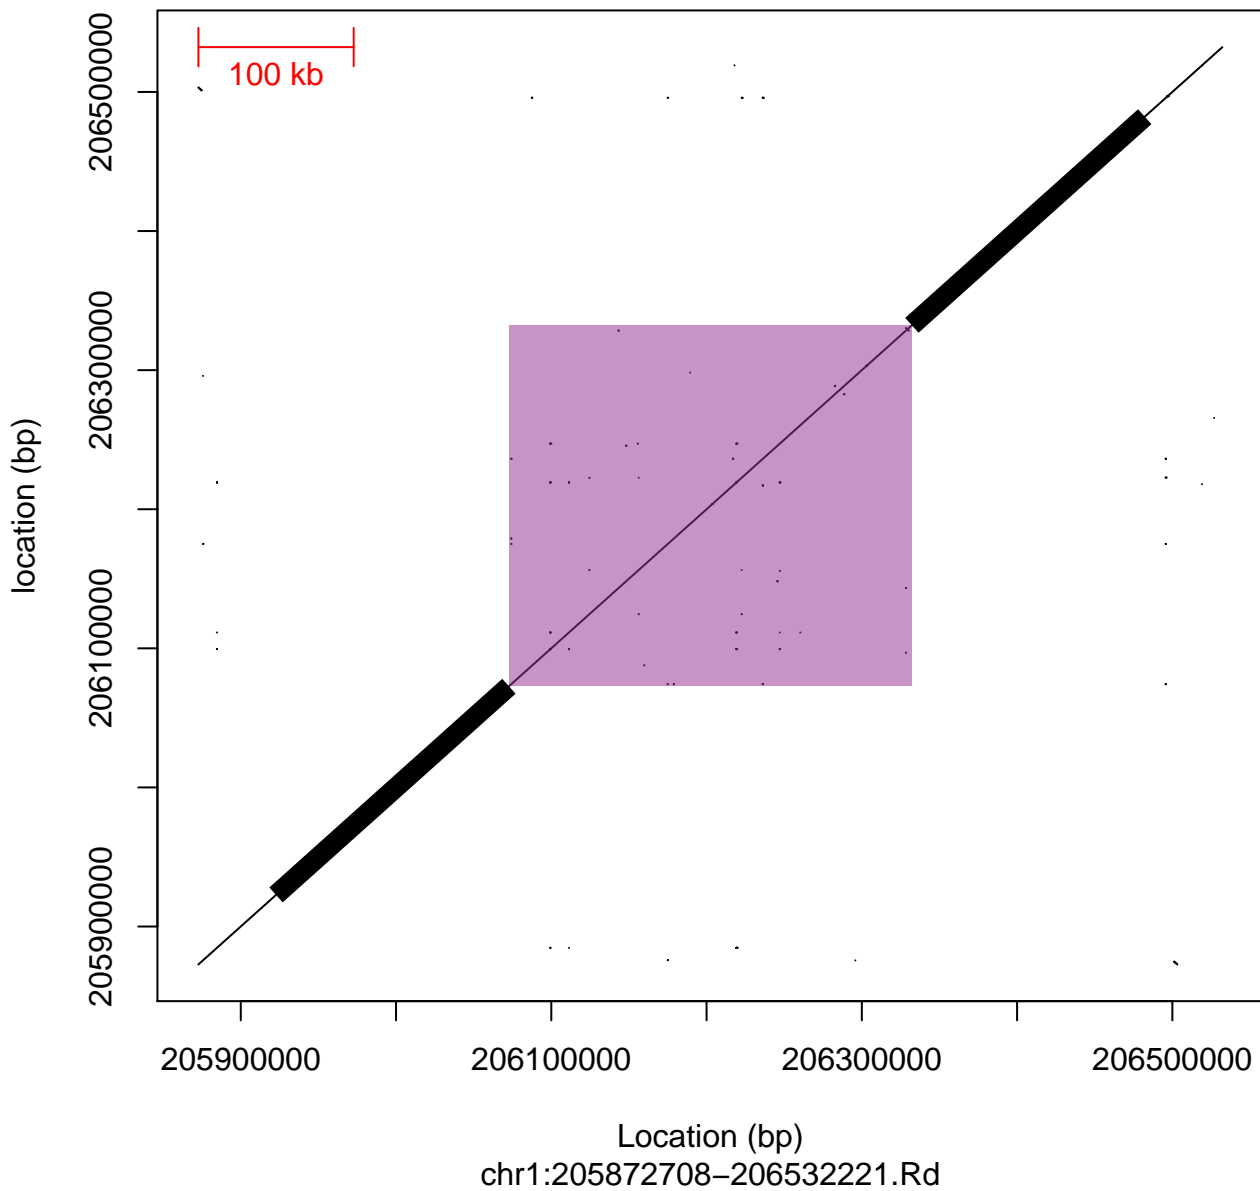

# Dotplot of ROIno.2.3 on chr2

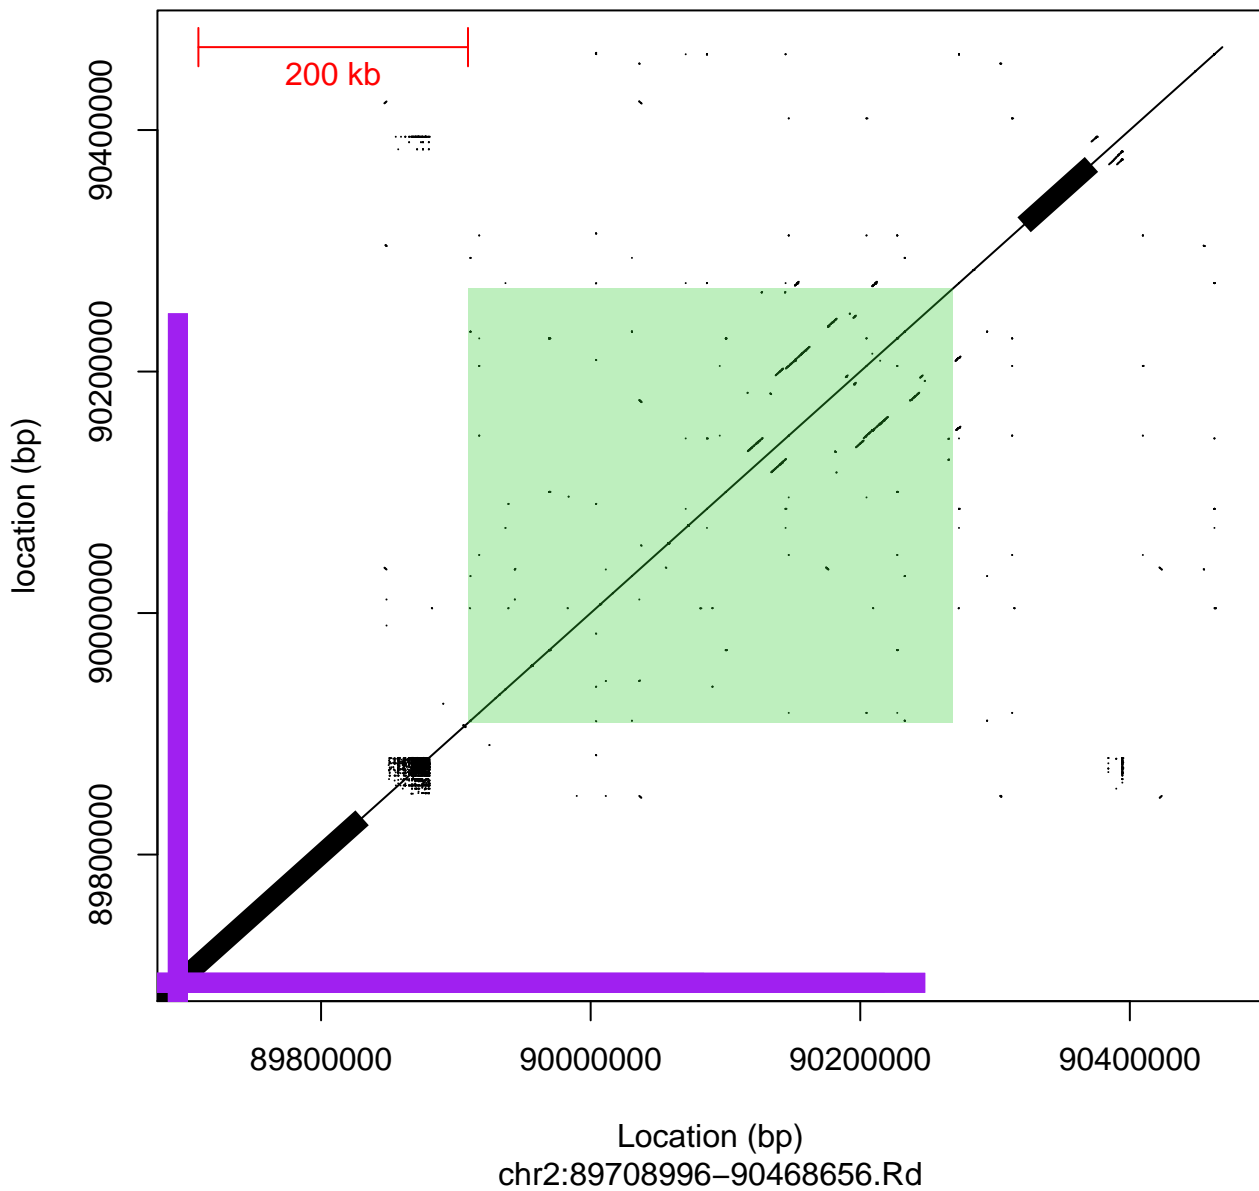

# Dotplot of mBM.2.1, fCB.2.1, ROIno.2.6, ROIno.2.7 on chr2

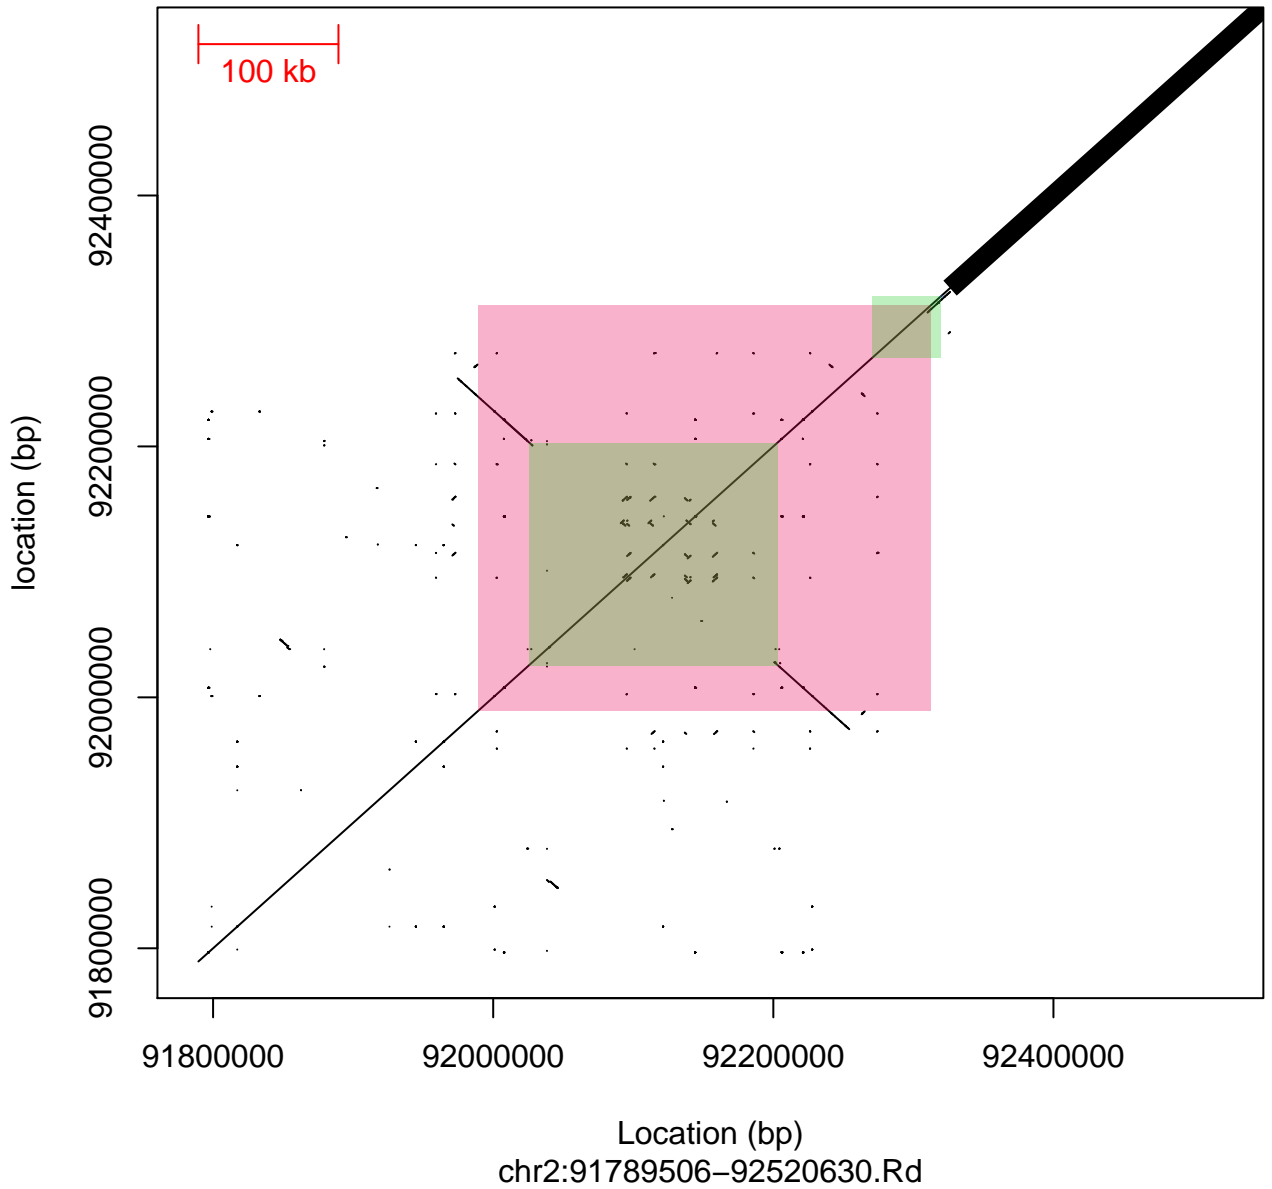

# Dotplot of mBM.2.2, ROIno.2.8 on chr2

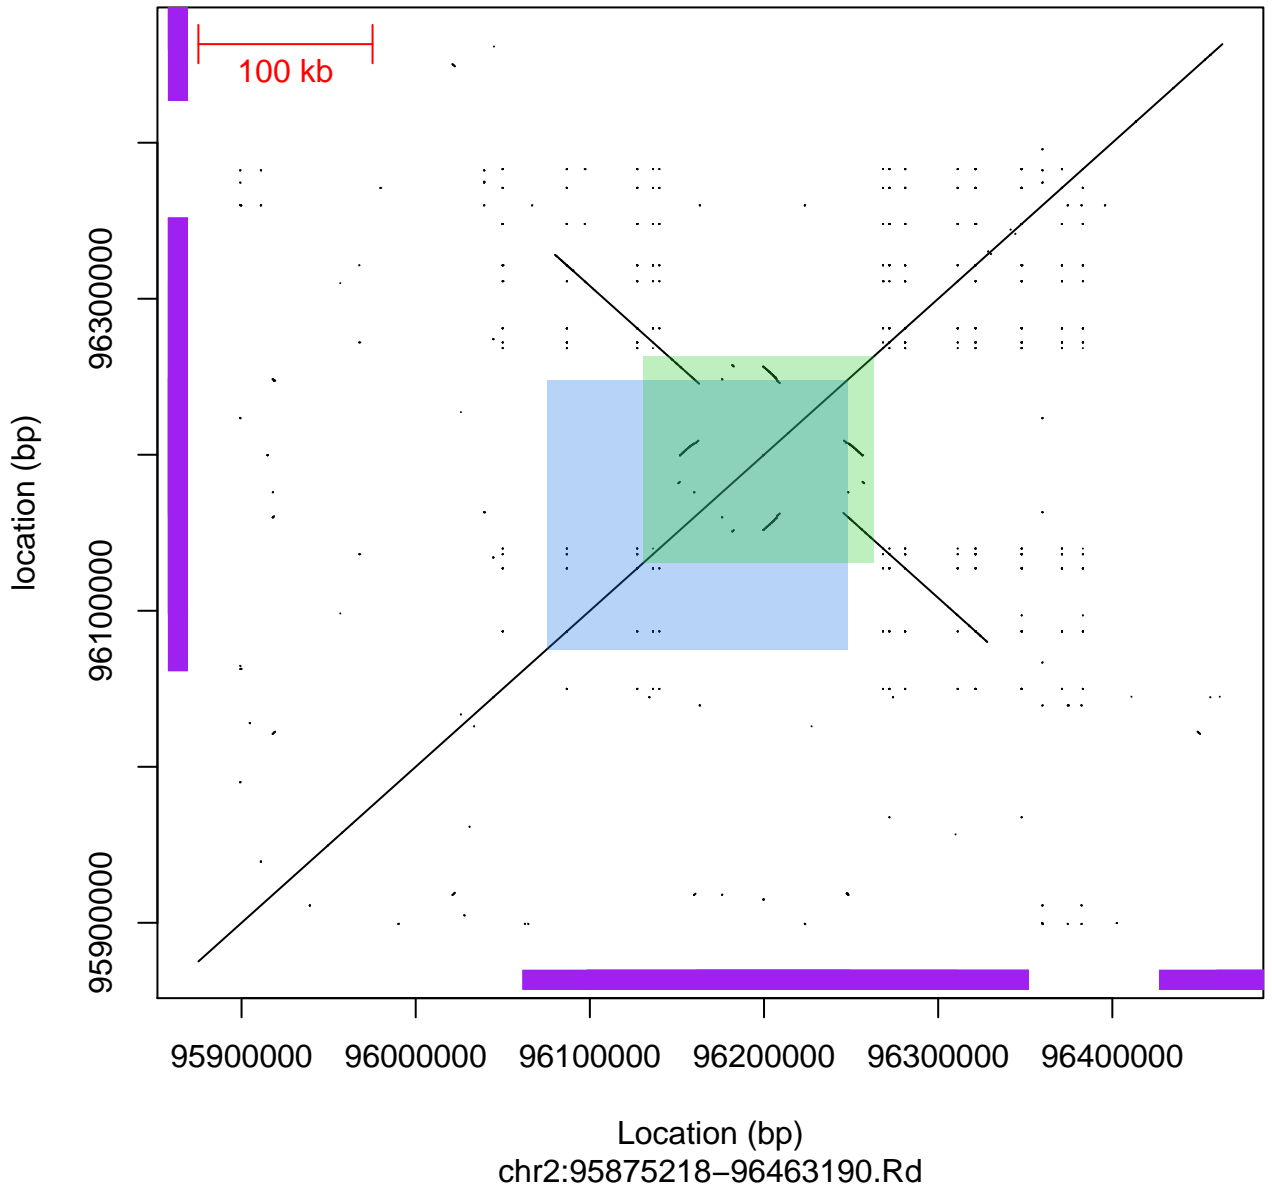

# Dotplot of mBM.2.3, ROIno.2.13 on chr2

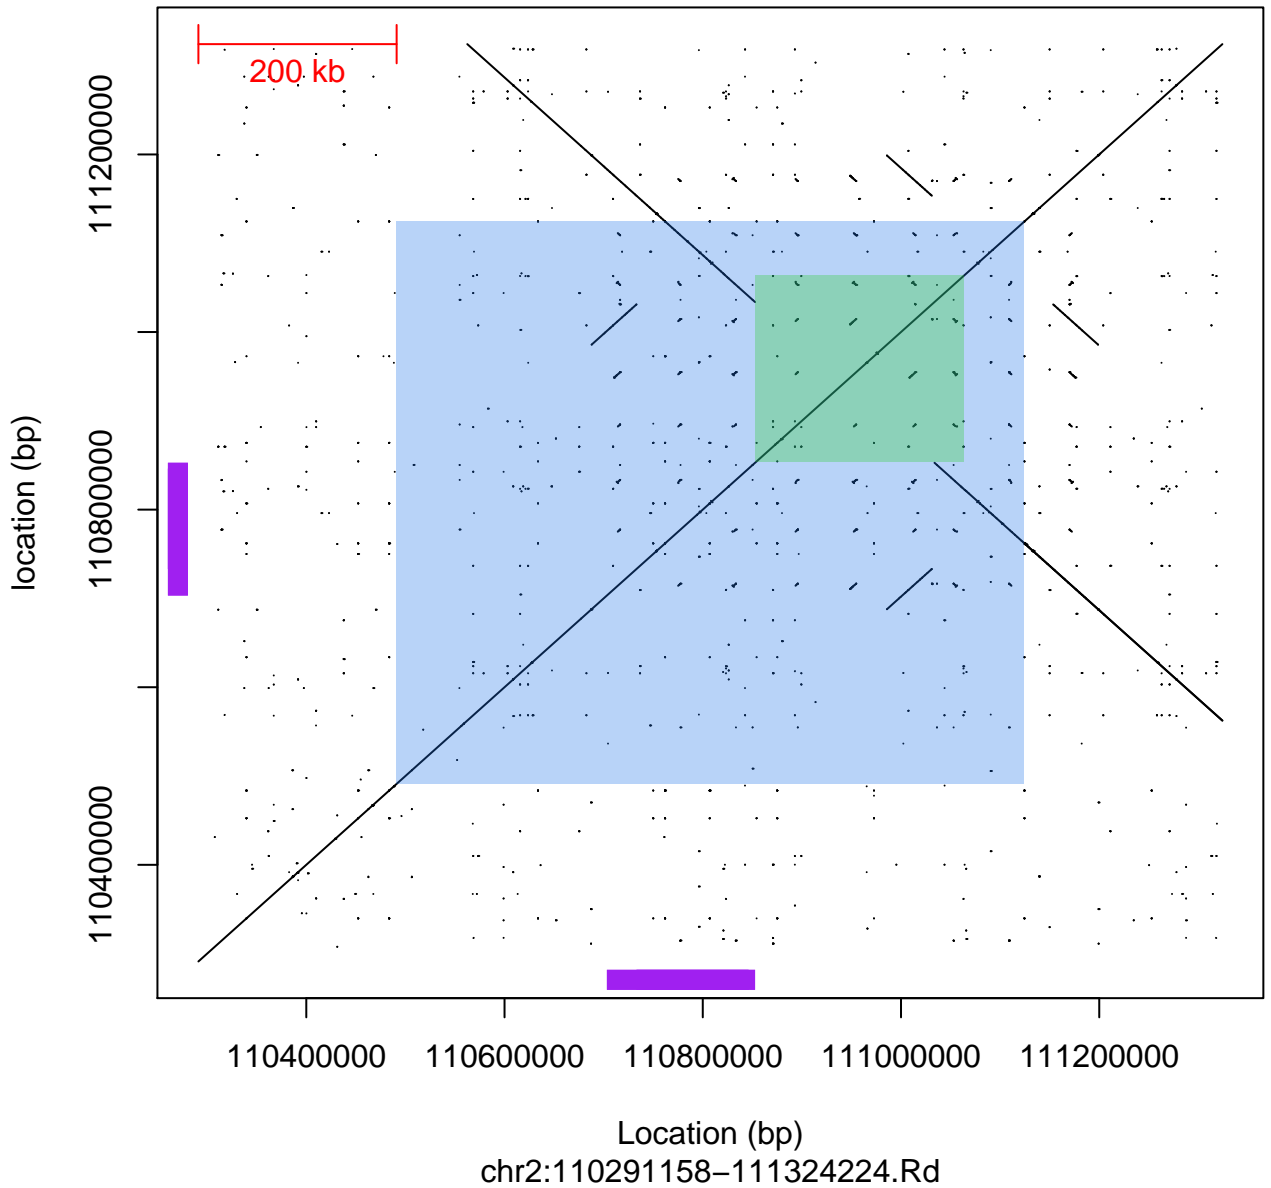

# Dotplot of mBM.2.4 on chr2

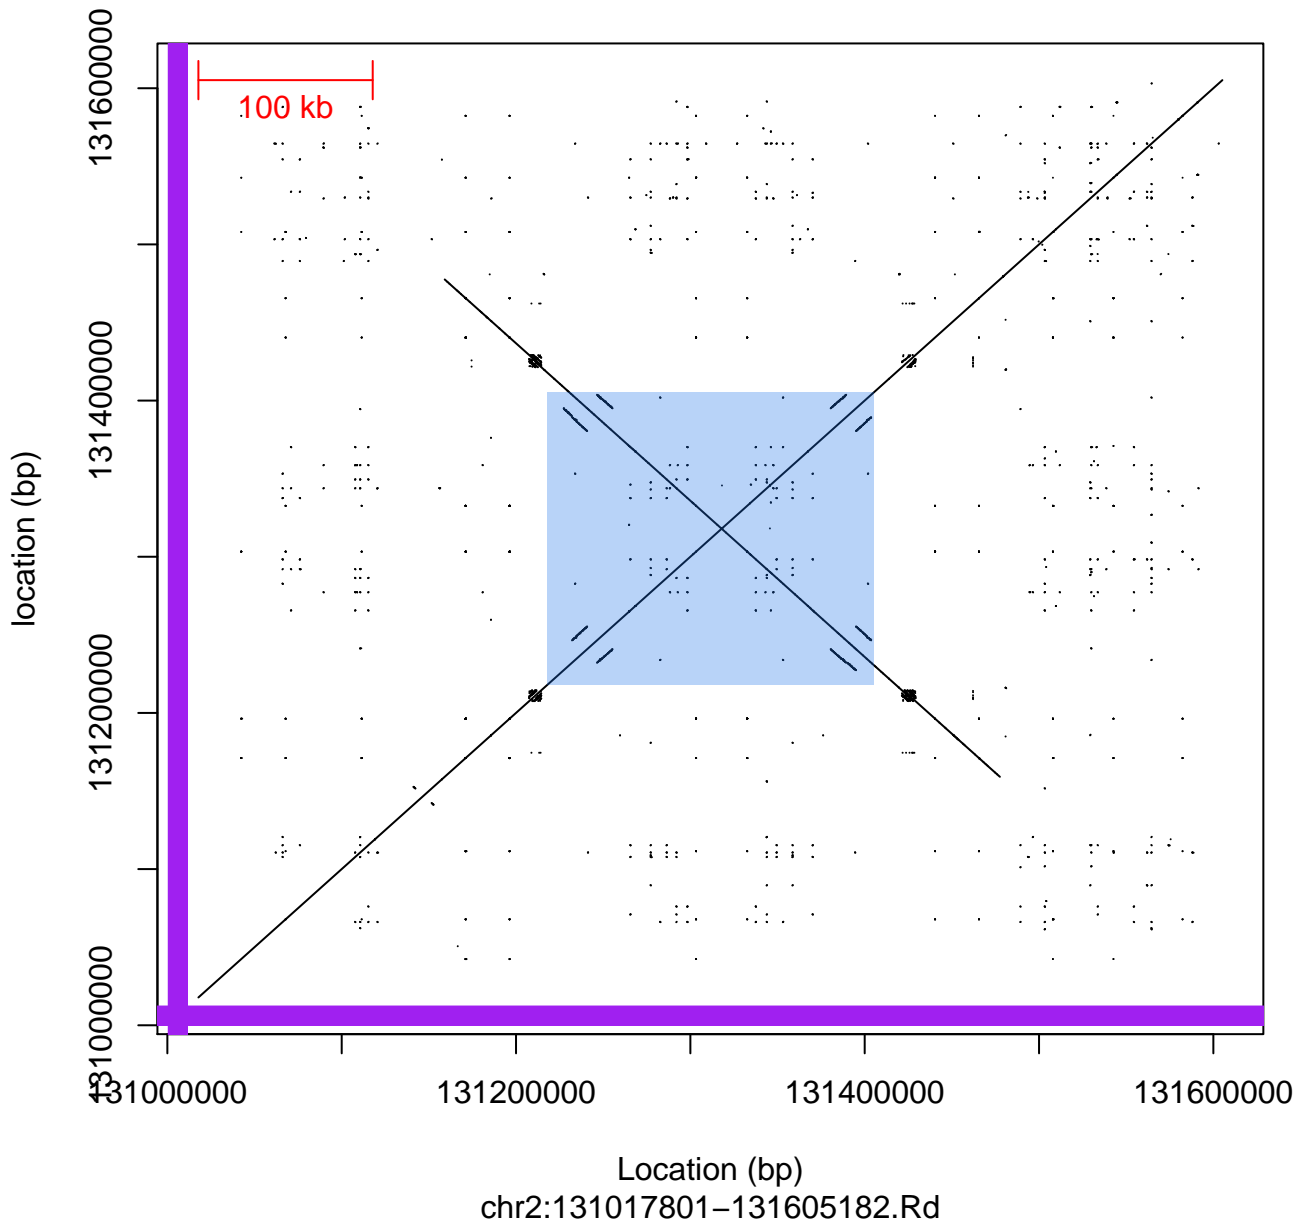



# Dotplot of mBM.3.1, fCB.3.1, ROIno.3.2 on chr3

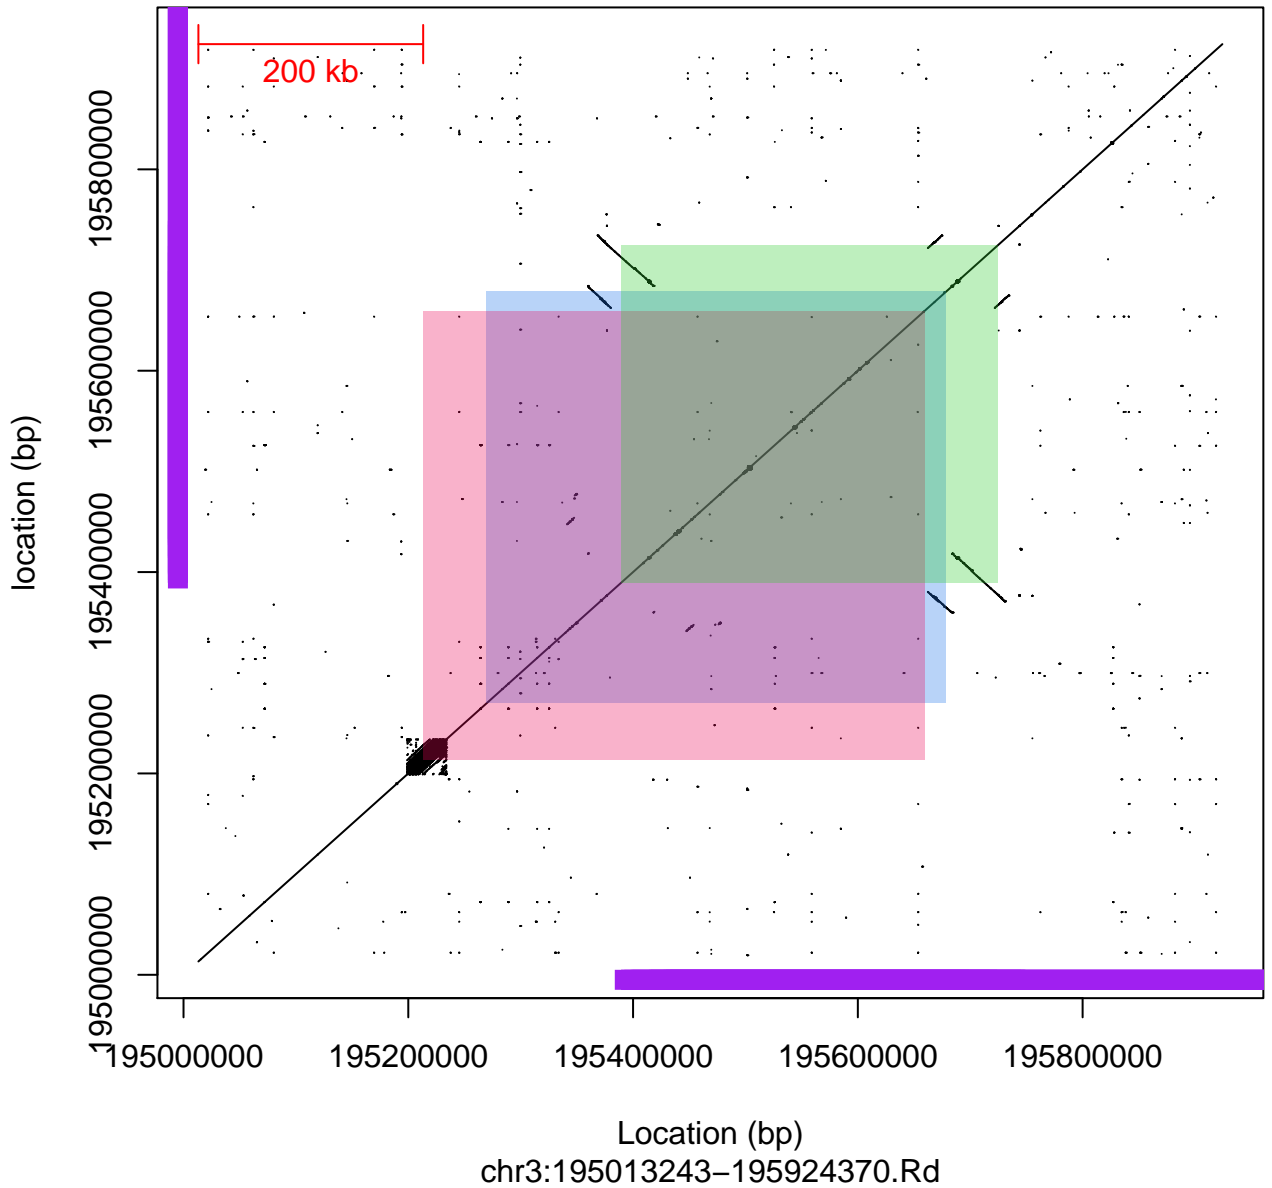

Dotplot of mBM.4.1, fCB.4.1, ROIno.4.1 on chr4

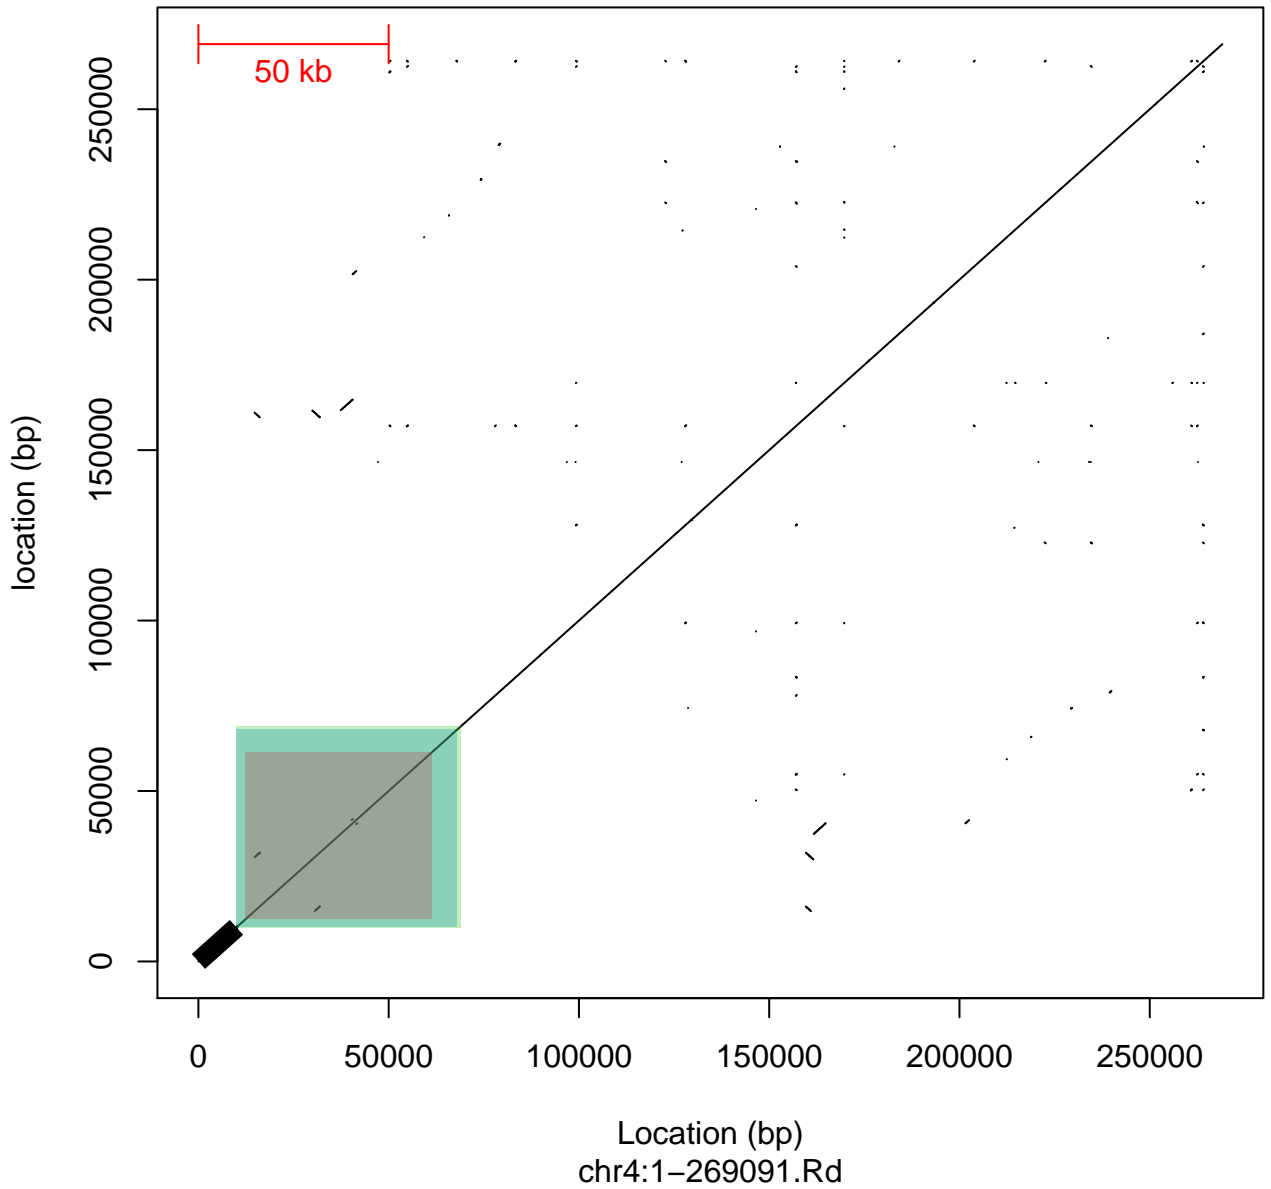

# Dotplot of mBM.4.2, fCB.4.2 on chr4

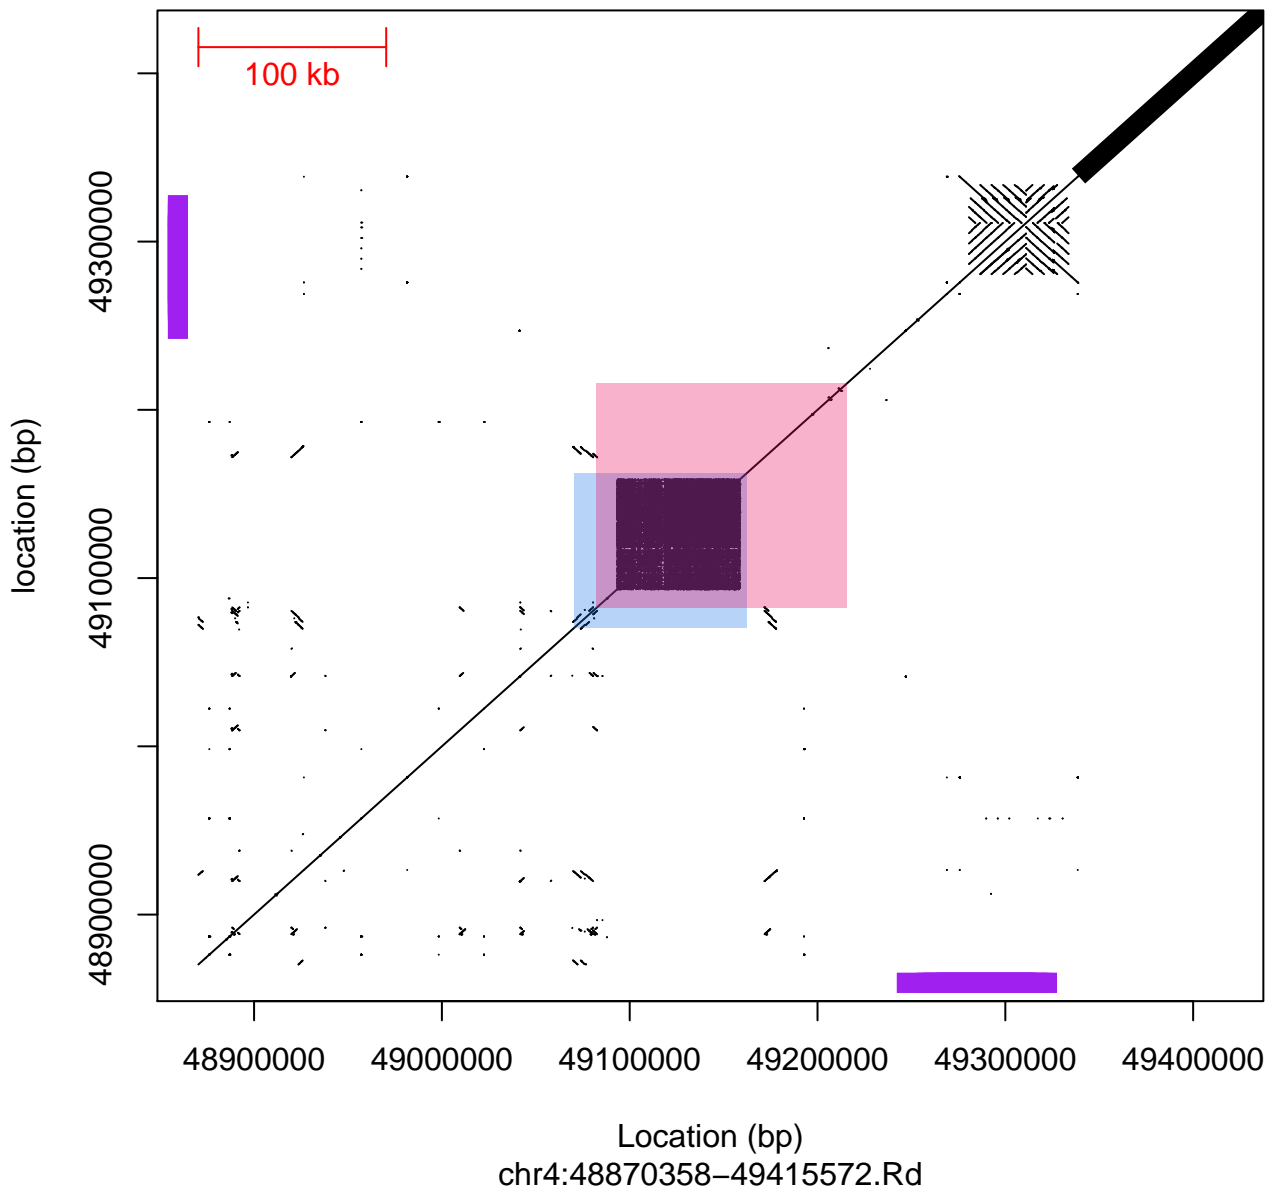

# Dotplot of ROIno.4.4 on chr4

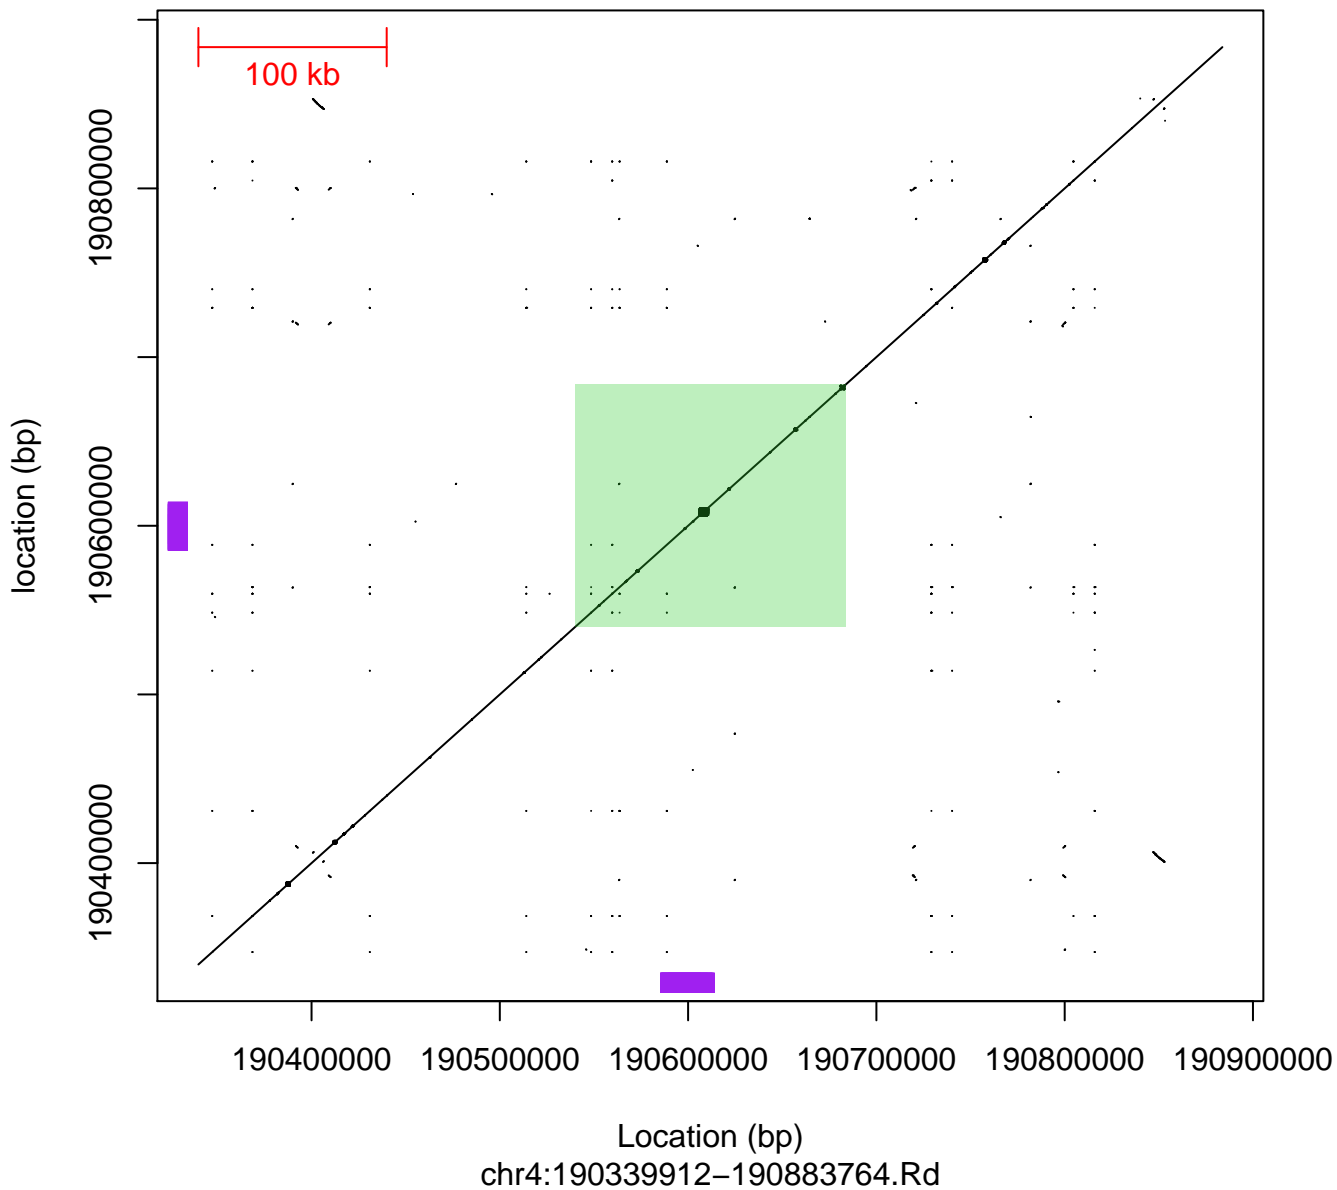

# Dotplot of ROIno.4.5 on chr4

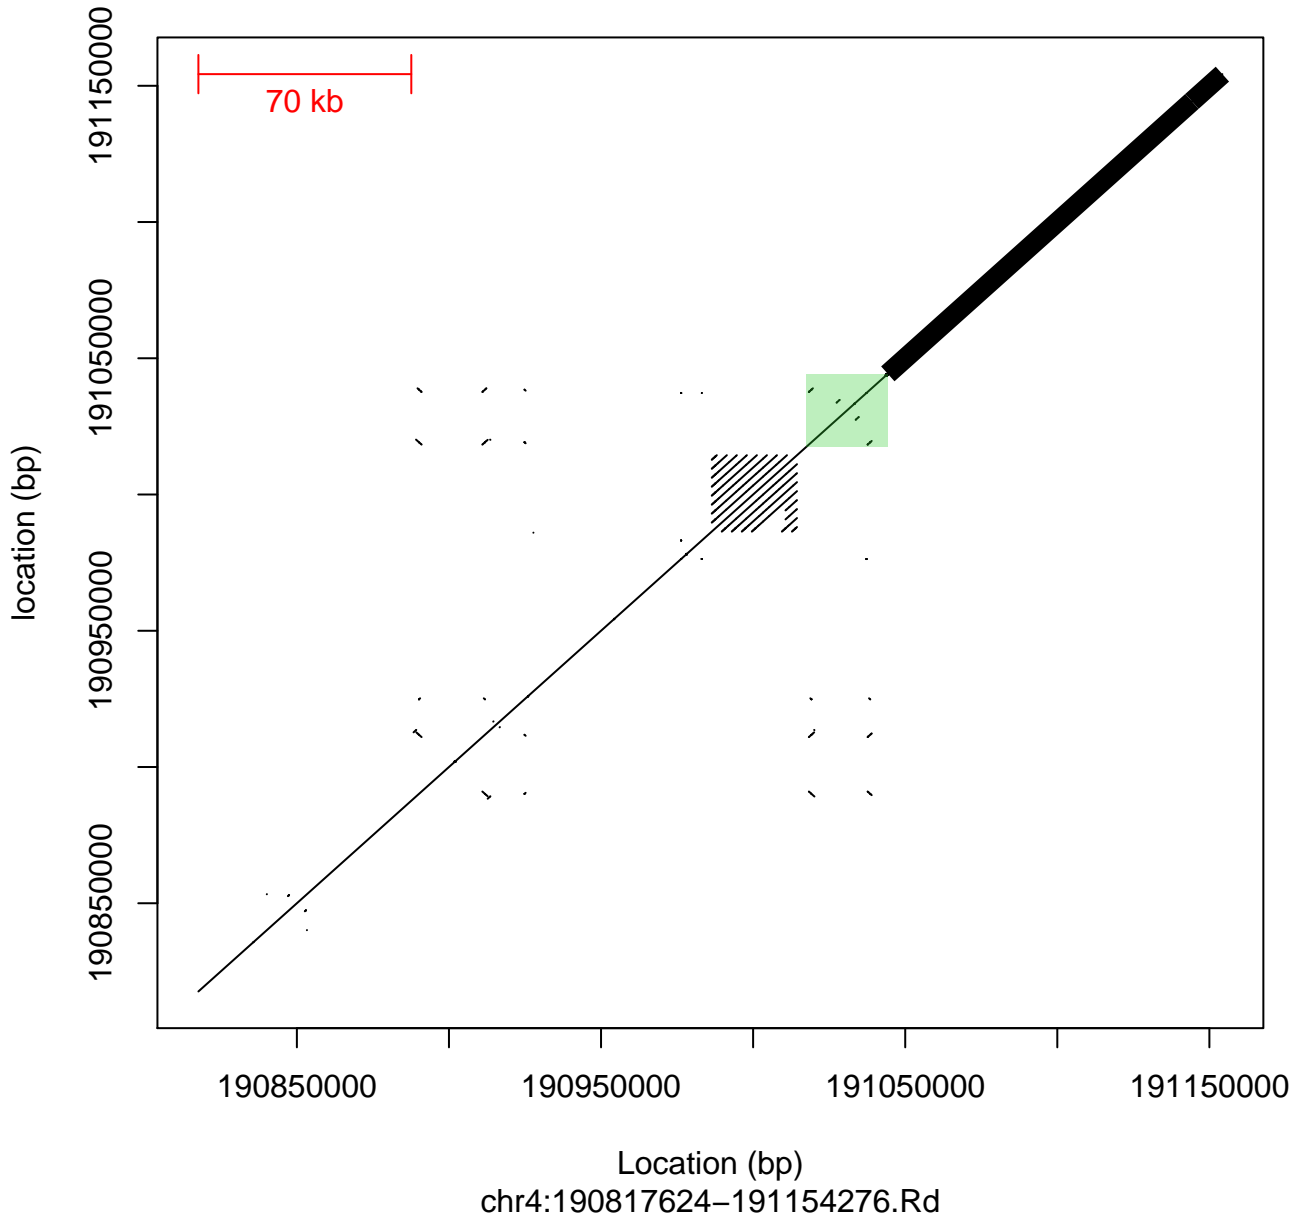

# Dotplot of mBM.5.1 on chr5

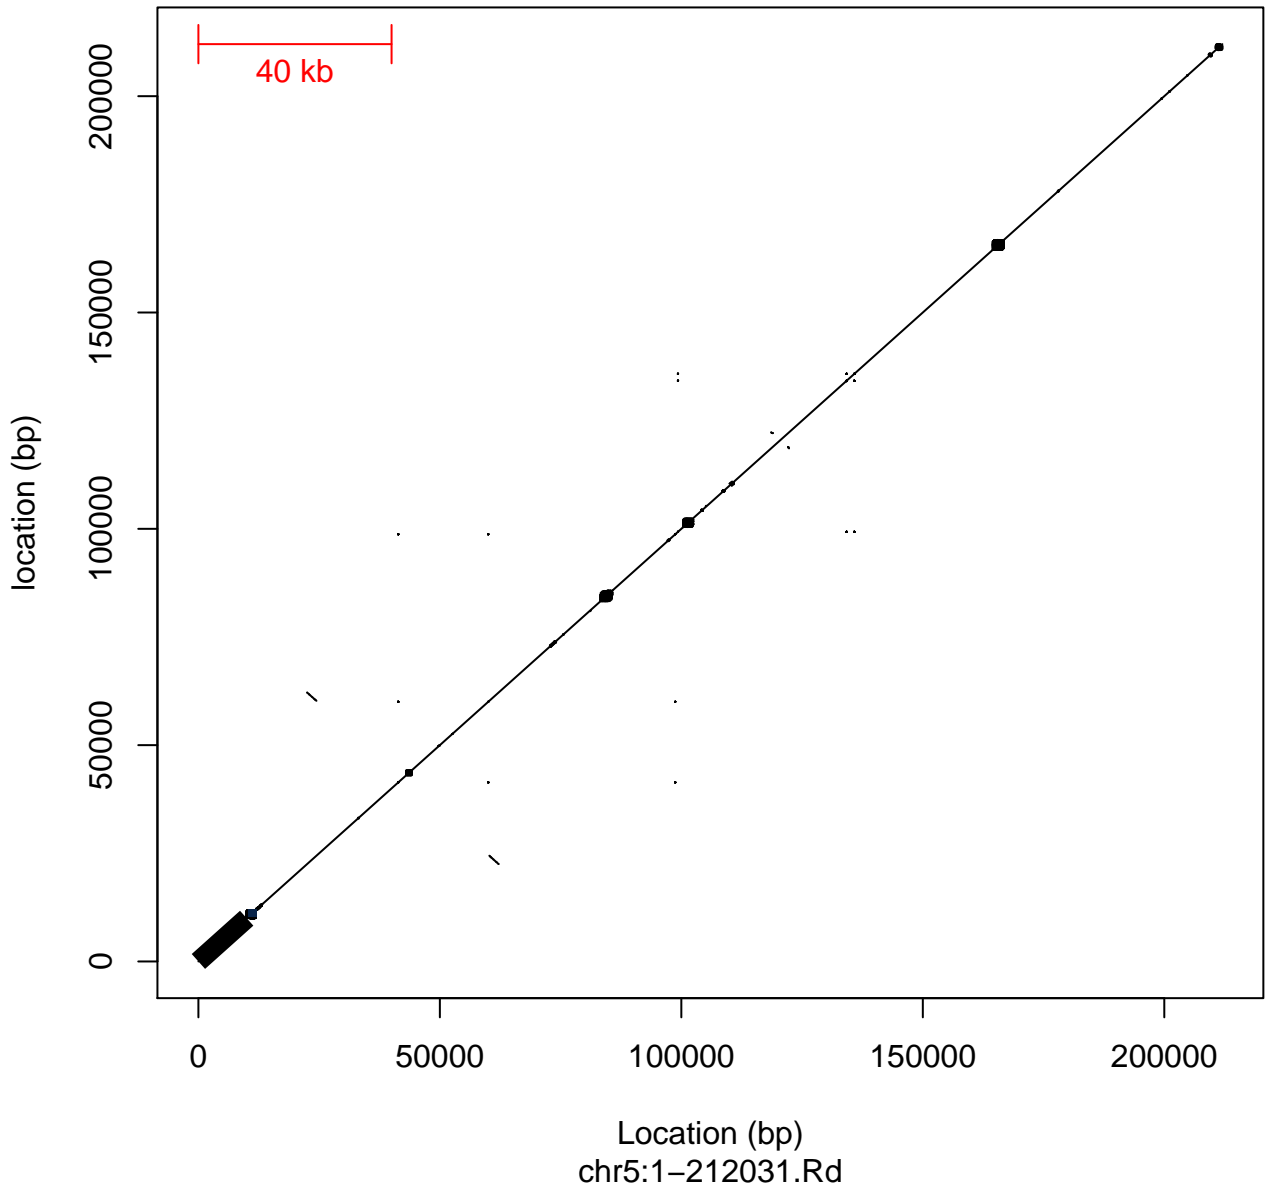

# Dotplot of ROIno.5.1 on chr5

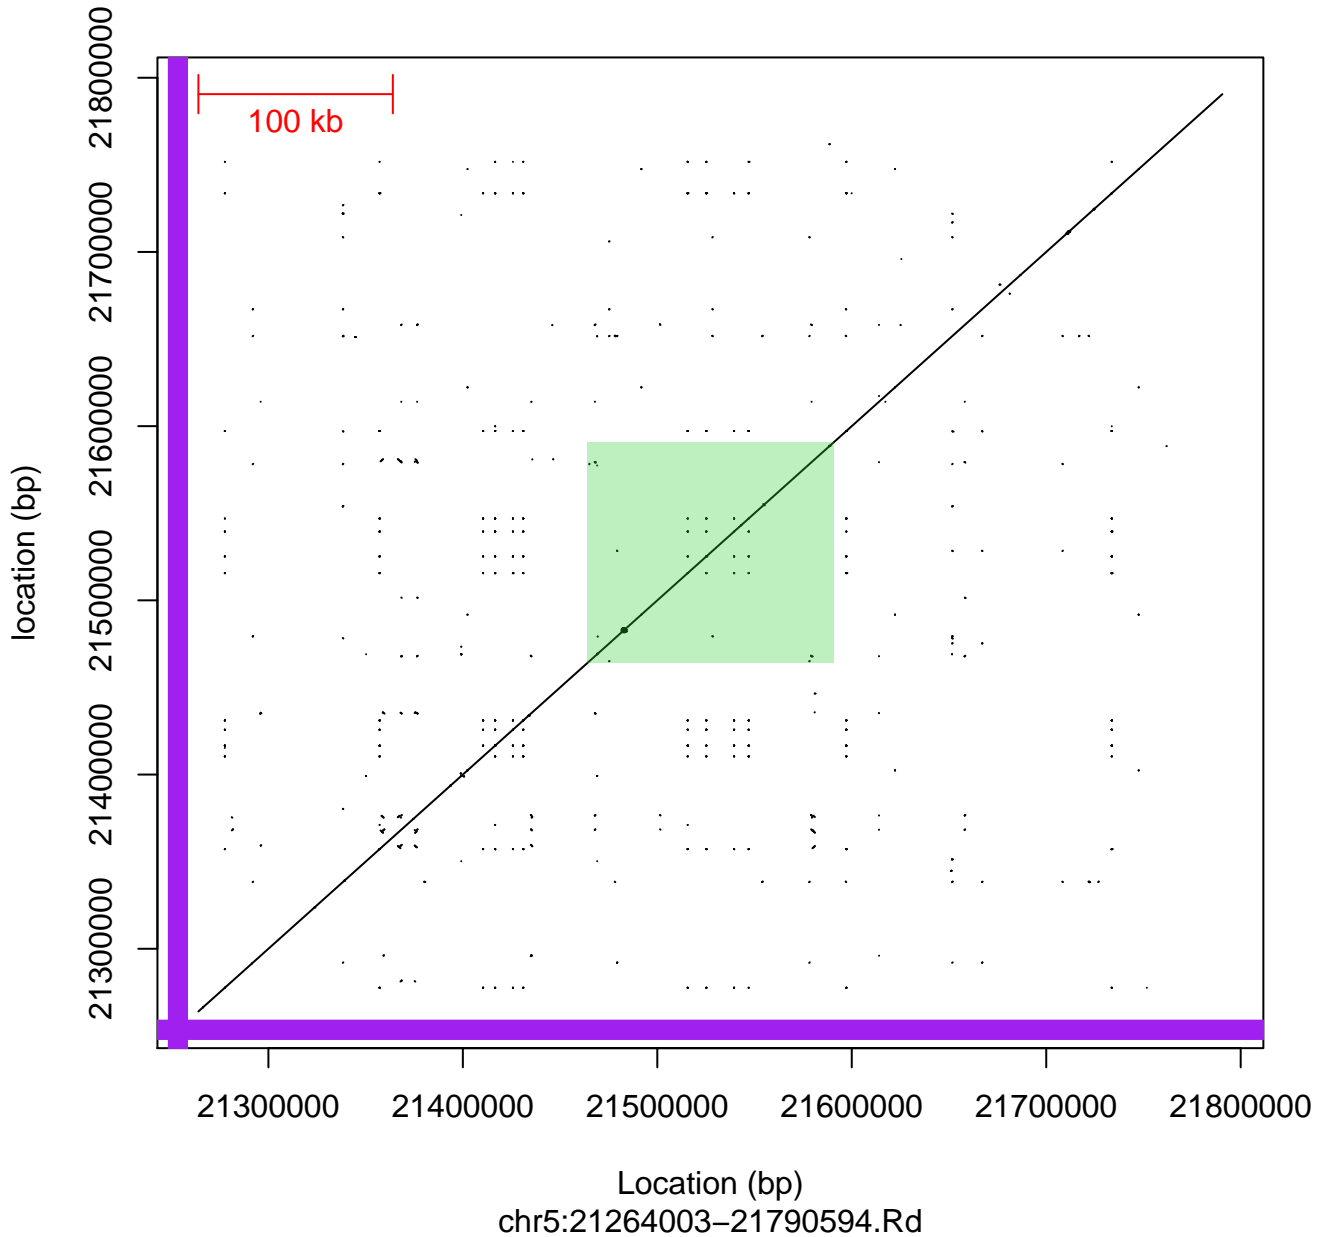

# Dotplot of mBM.5.2, fCB.5.1, ROIno.5.2 on chr5

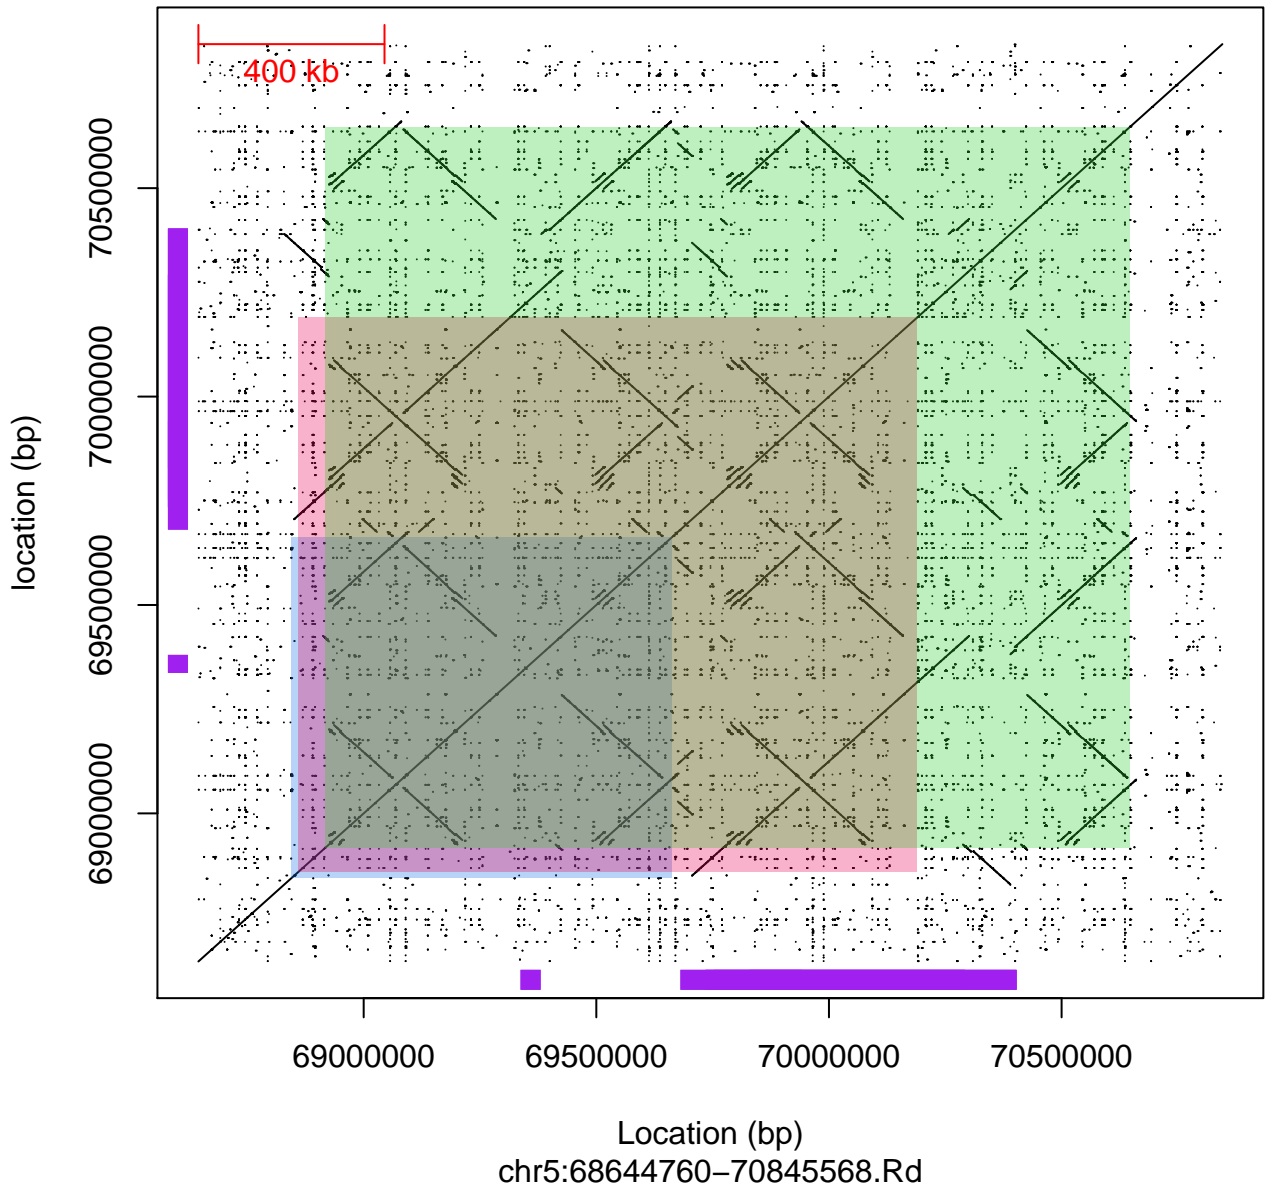



# Dotplot of ROIno.5.4 on chr5

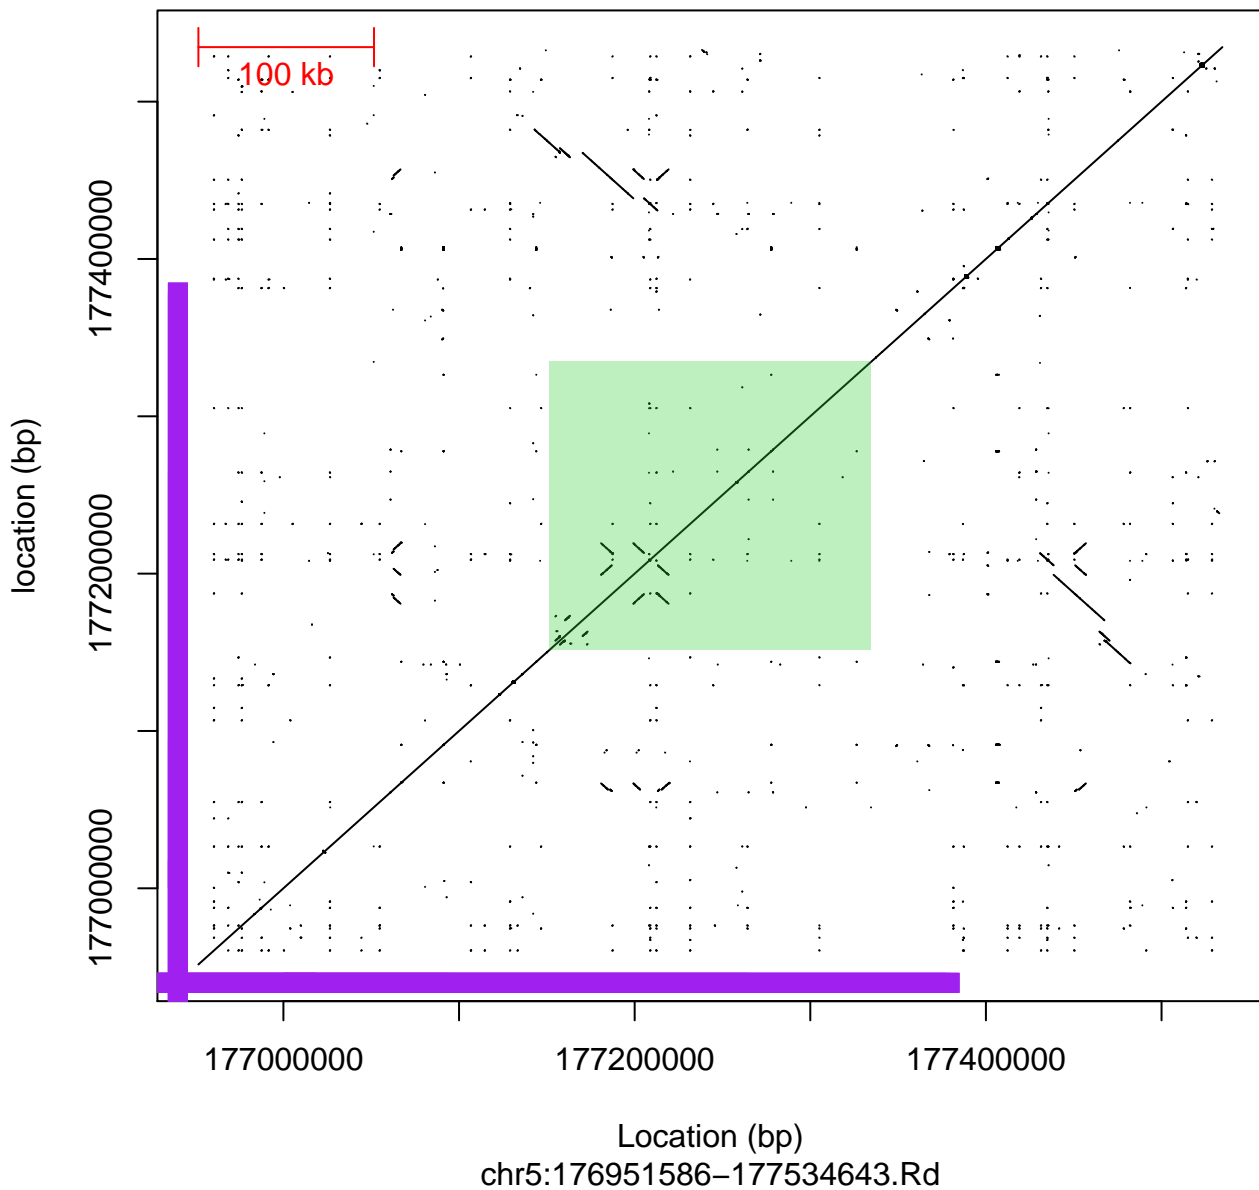

Dotplot of mBM.6.1, fCB.6.1, ROIno.6.1 on chr6

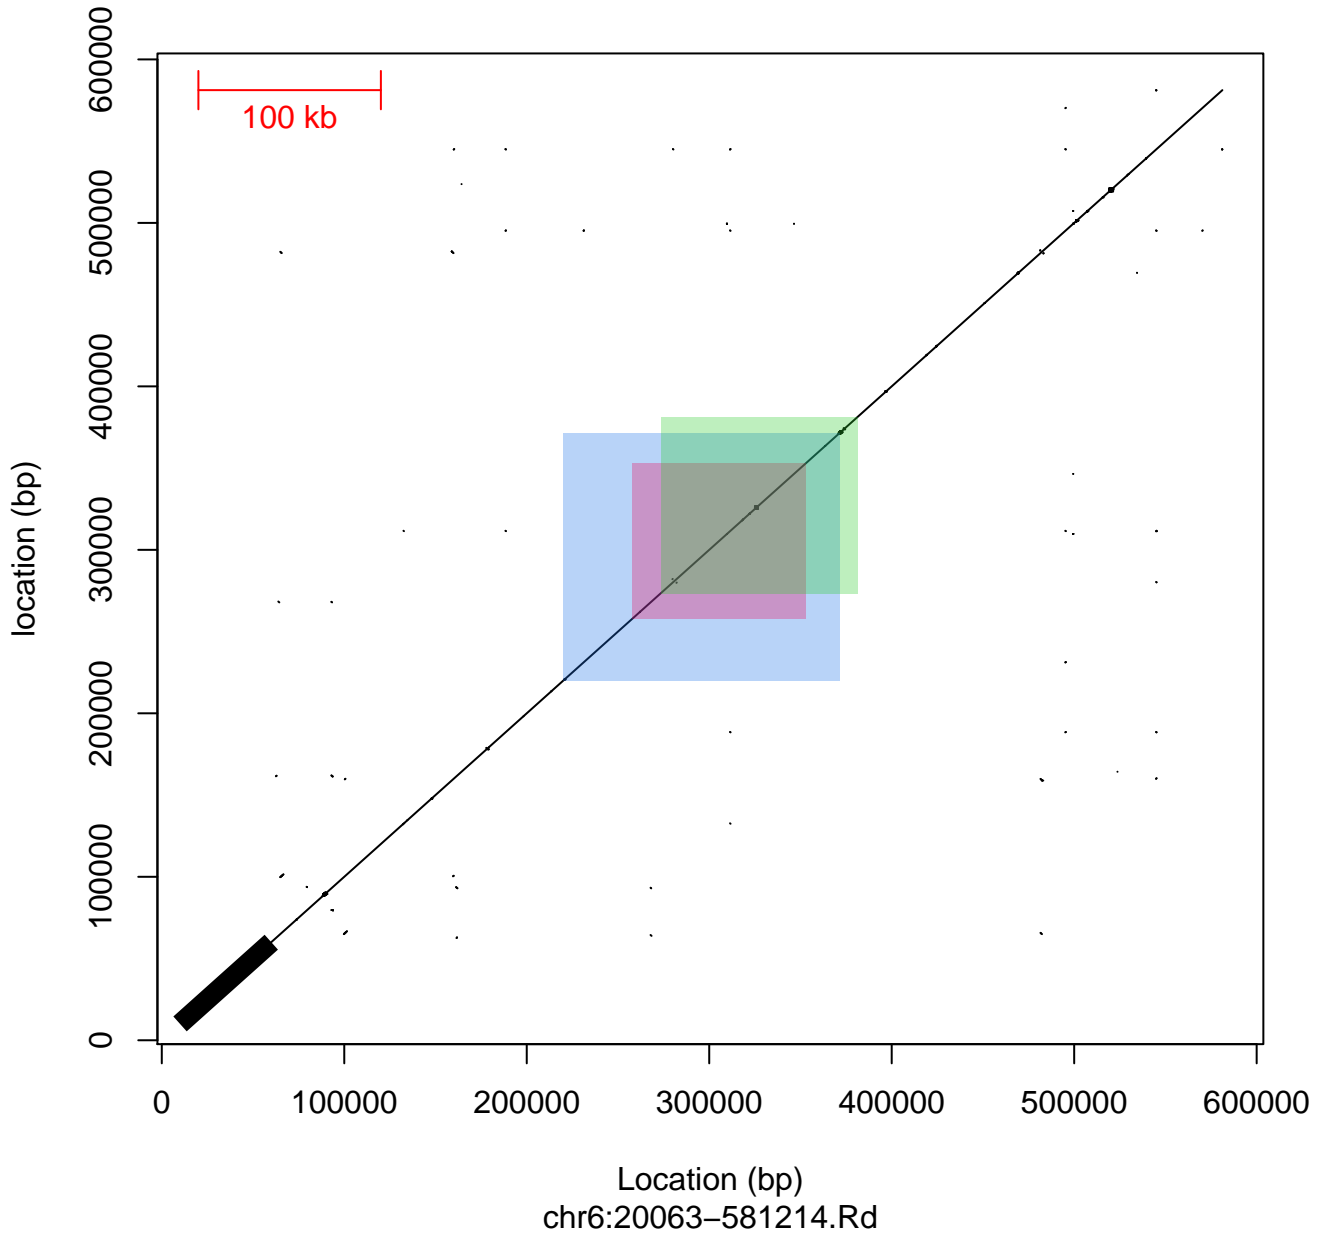

# Dotplot of ROIno.6.4 on chr6

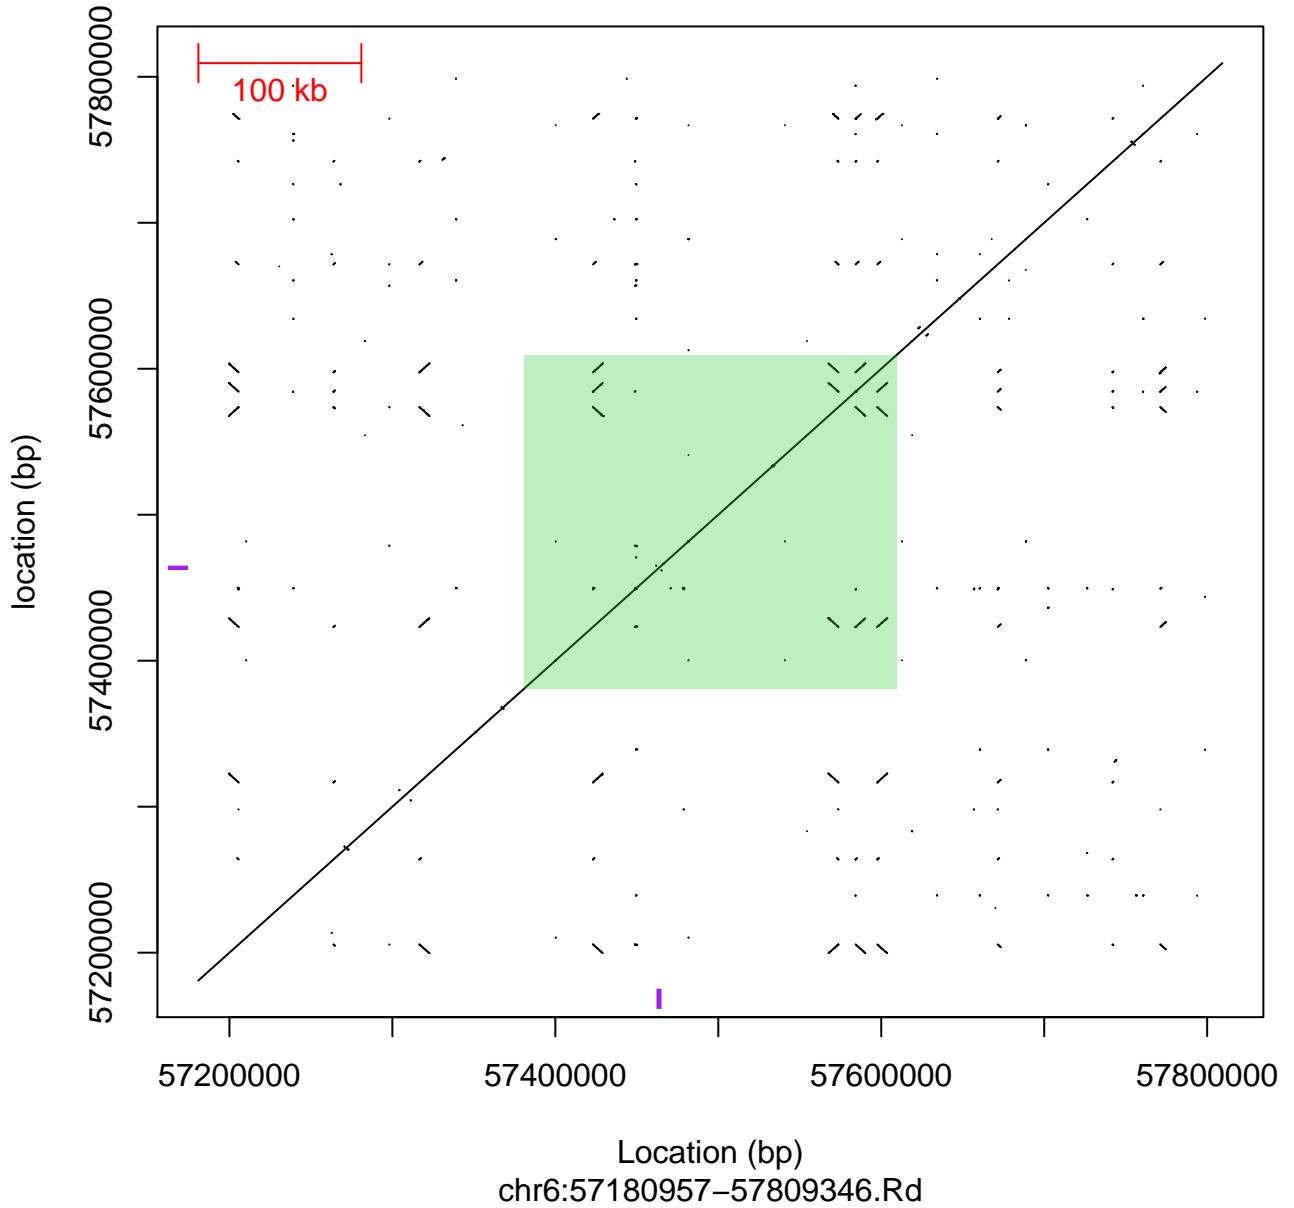

# Dotplot of mBM.6.2, fCB.6.2 on chr6

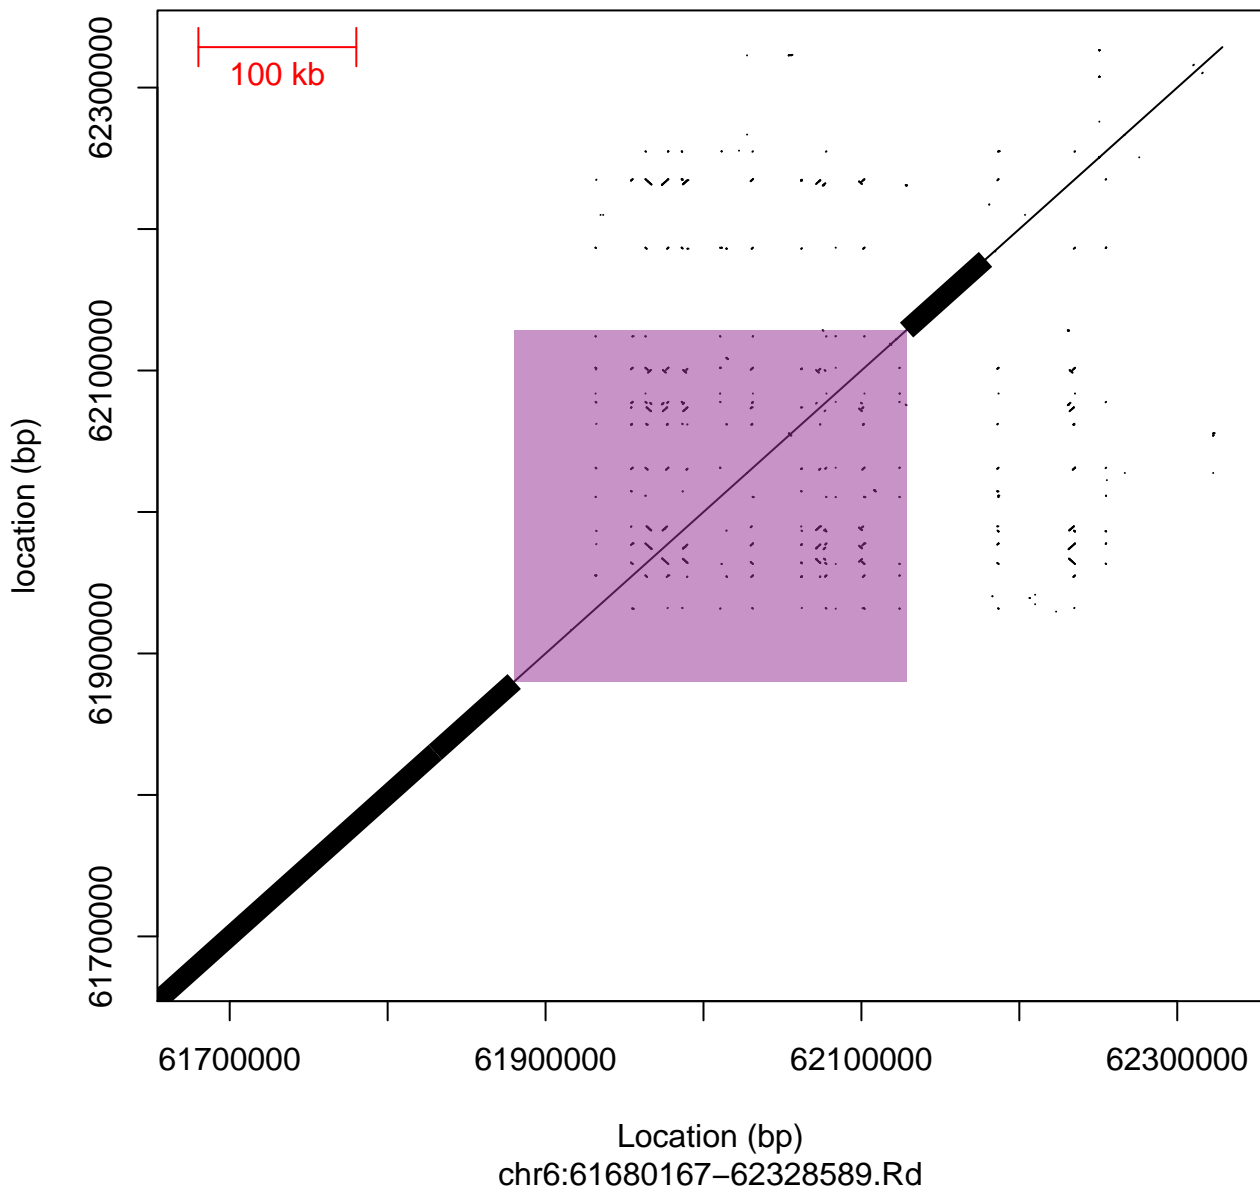

# Dotplot of mBM.6.3, fCB.6.3 on chr6

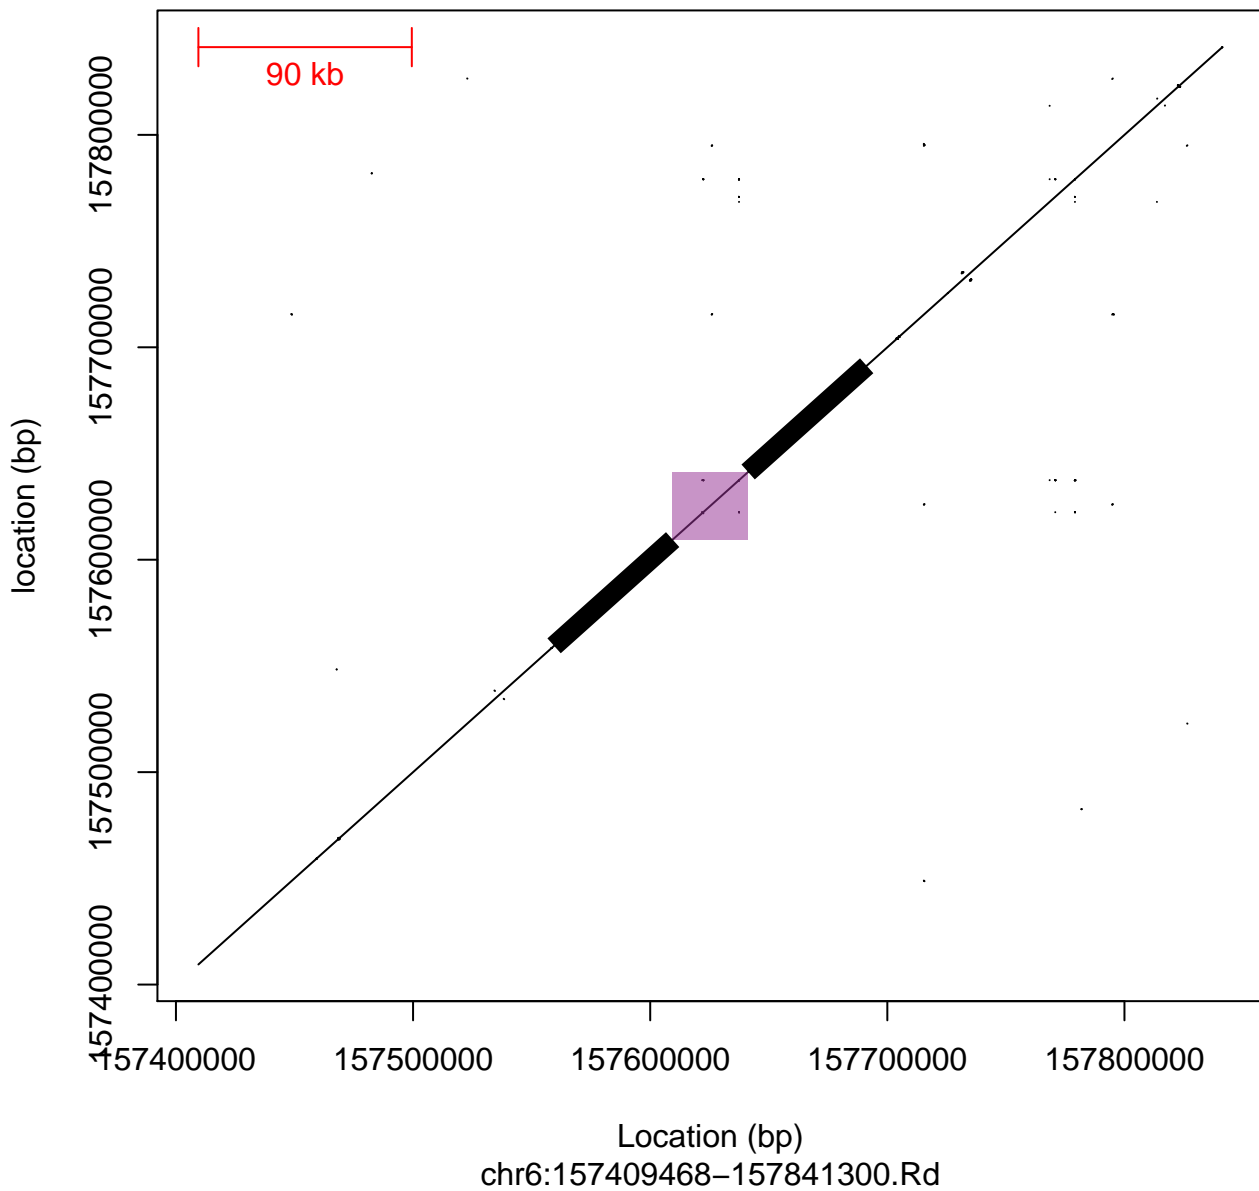

# Dotplot of fCB.7.1, ROIno.7.2, ROIno.7.3 on chr7

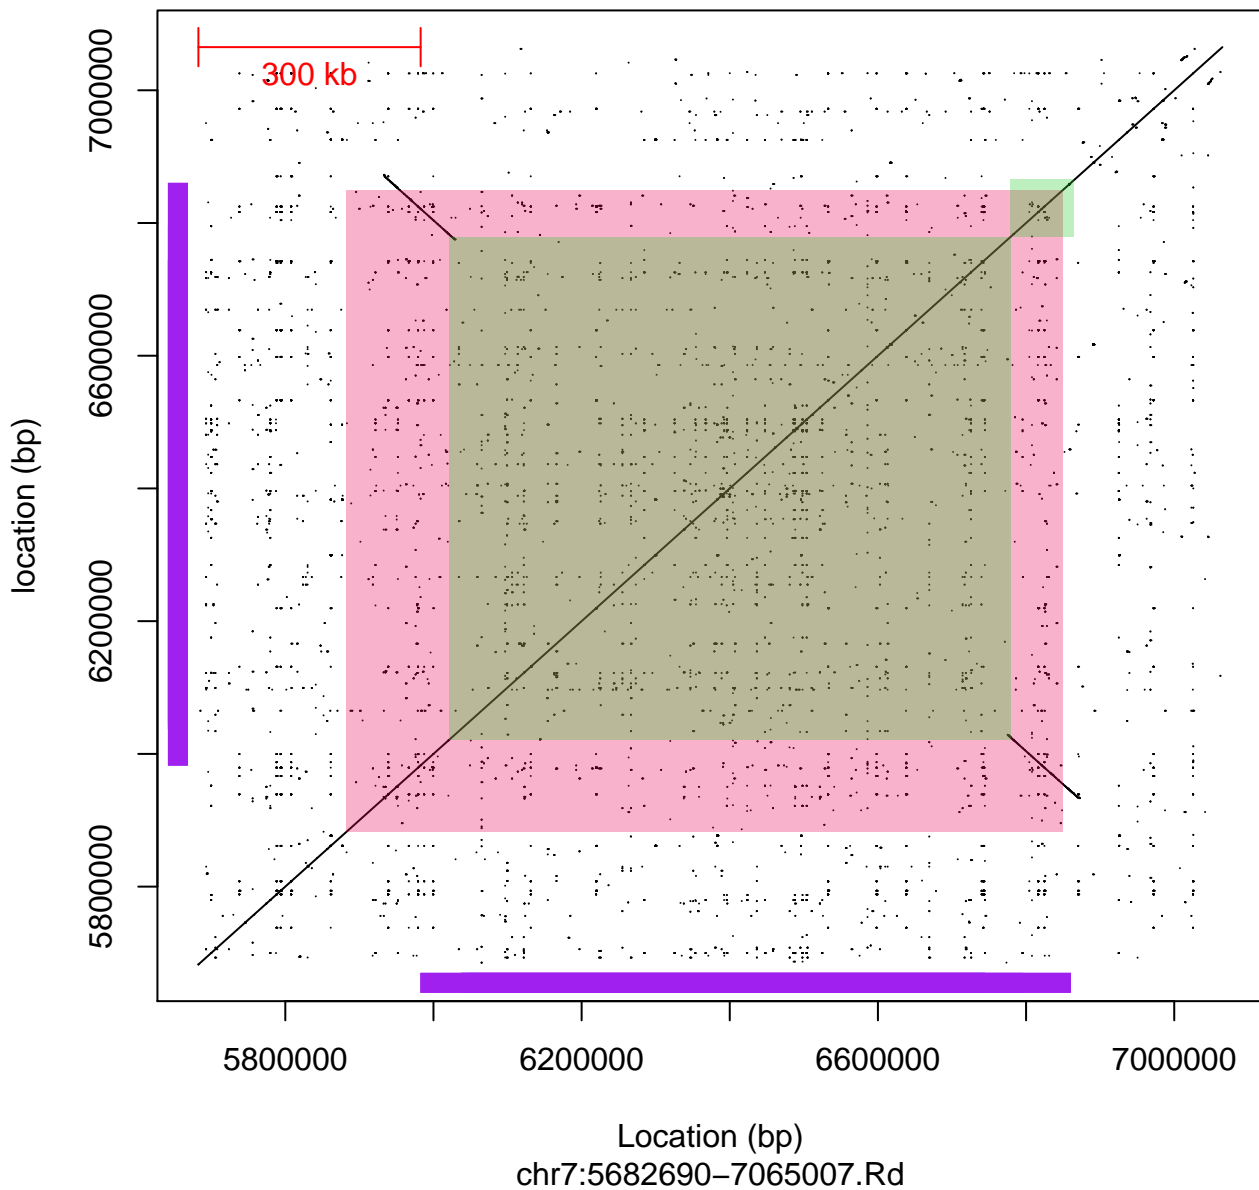

# Dotplot of mBM.7.1, ROIno.7.4 on chr7

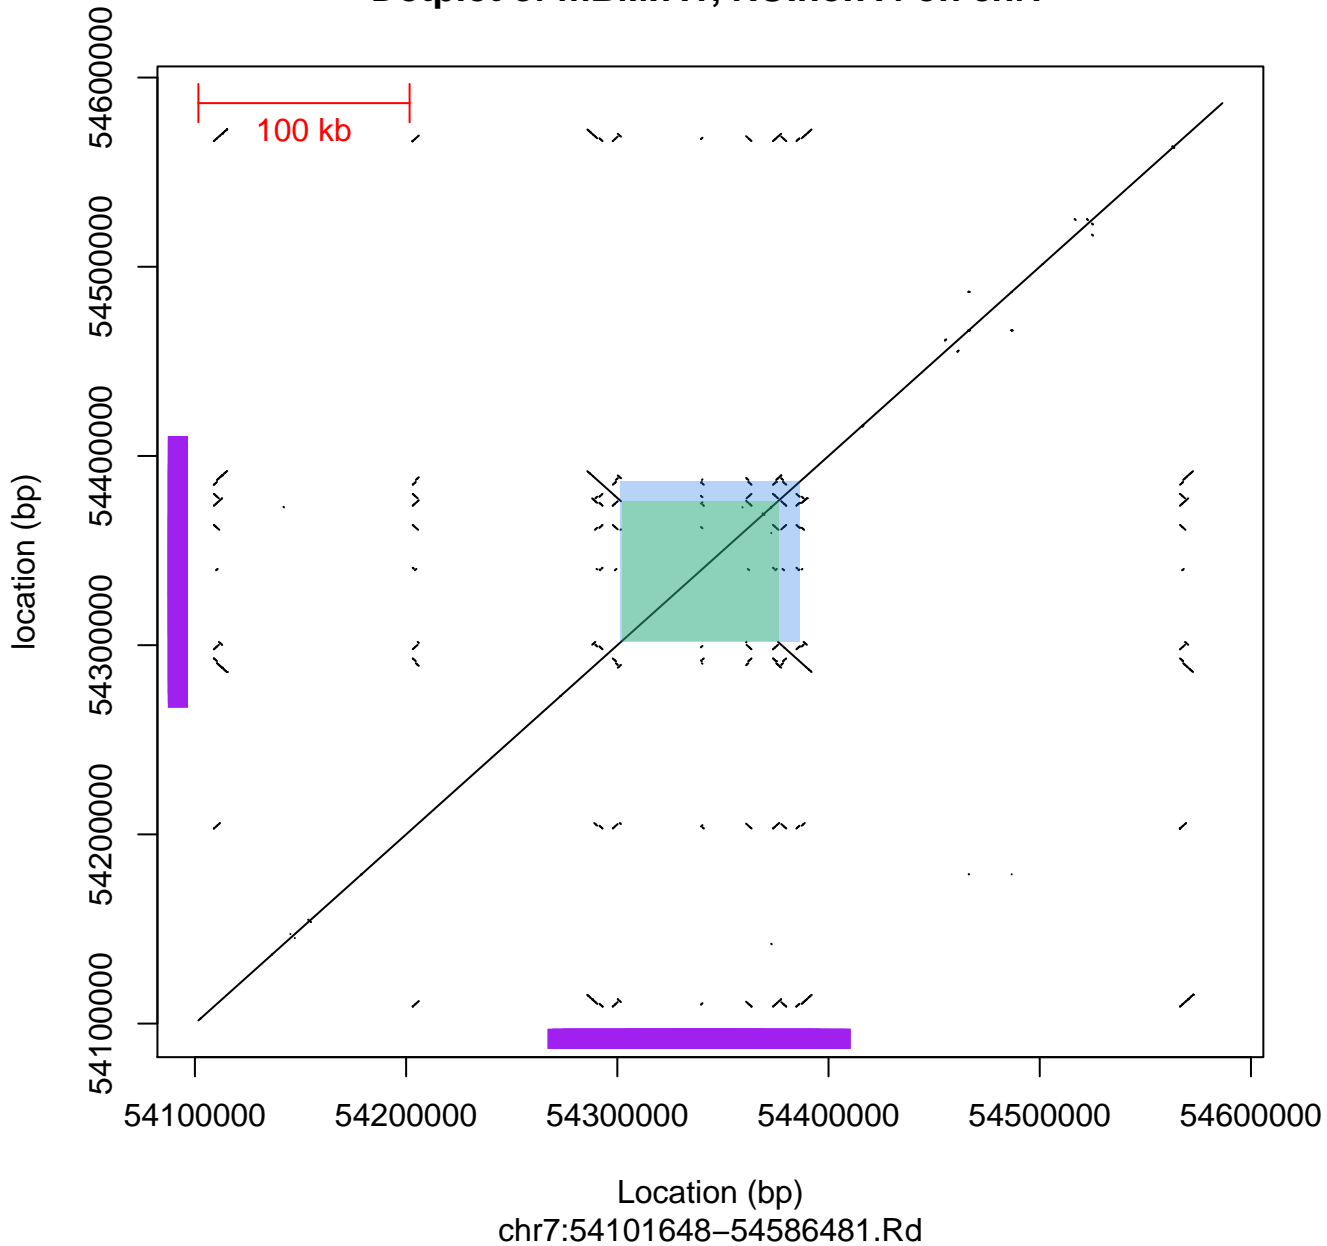

# Dotplot of ROIno.7.5 on chr7

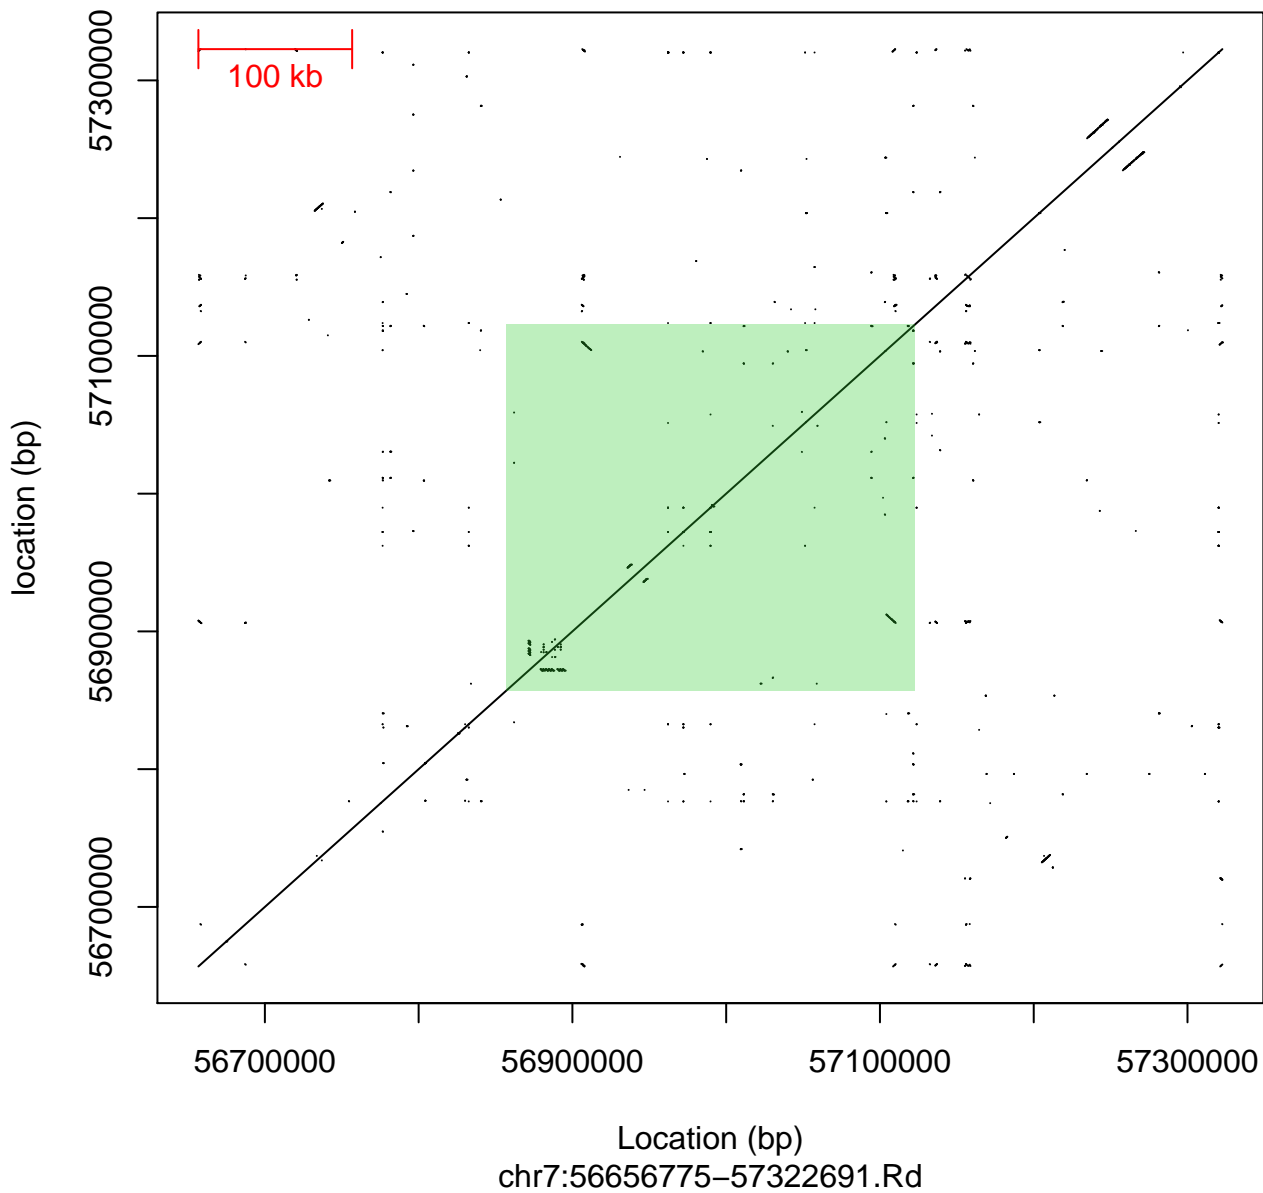



# Dotplot of fCB.7.2, ROIno.7.6 on chr7

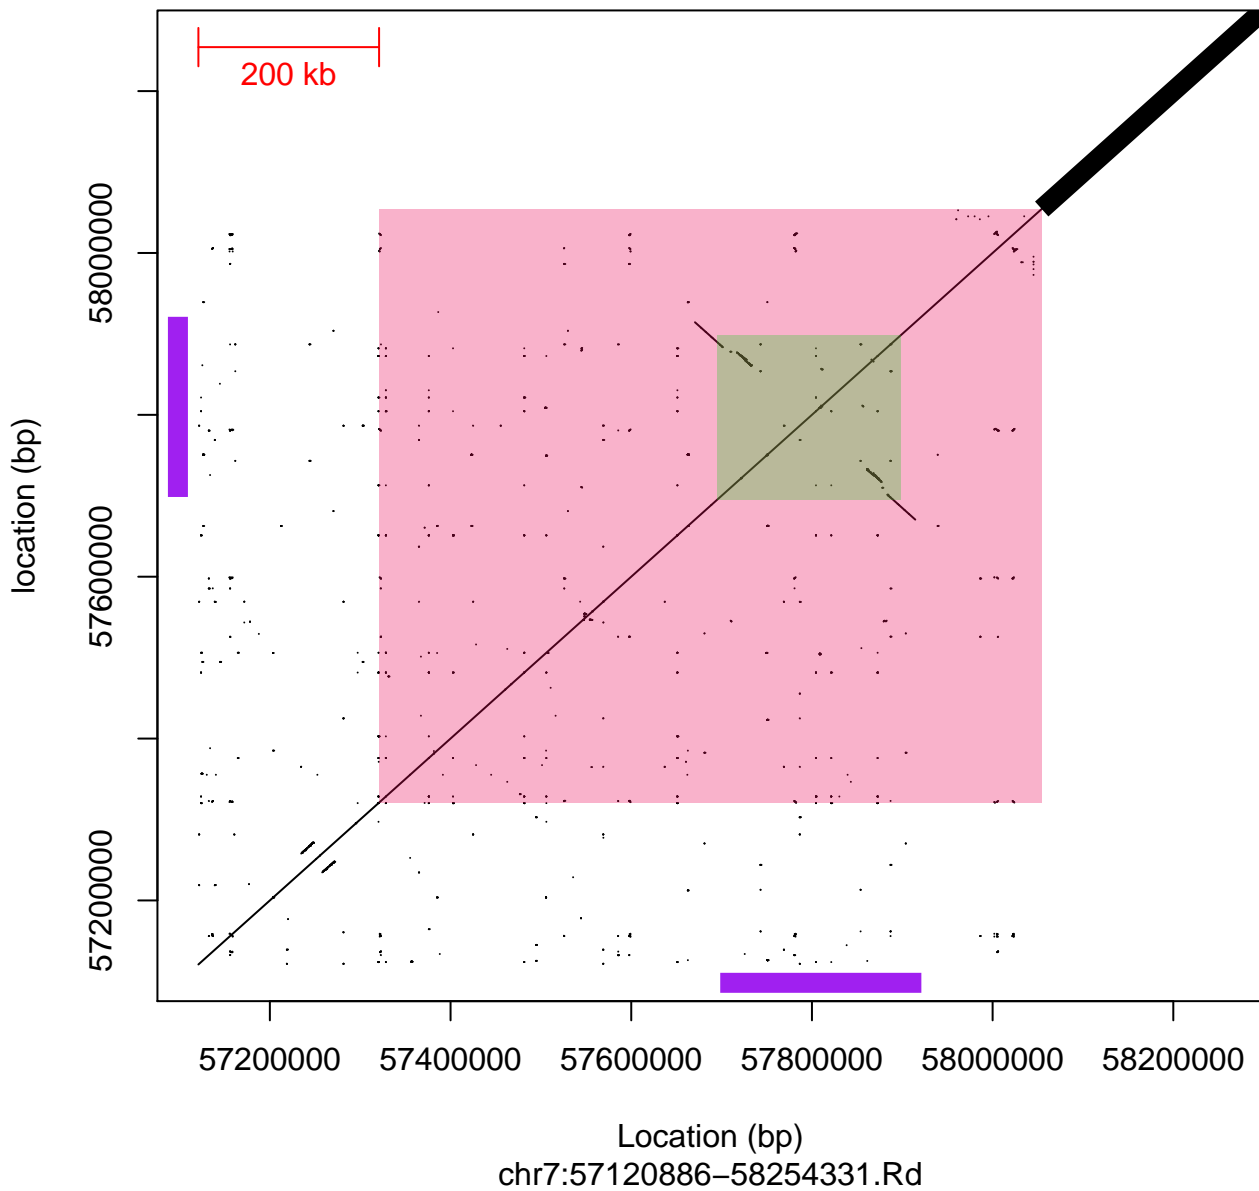

# Dotplot of mBM.7.2, fCB.7.3, ROIno.7.9 on chr7

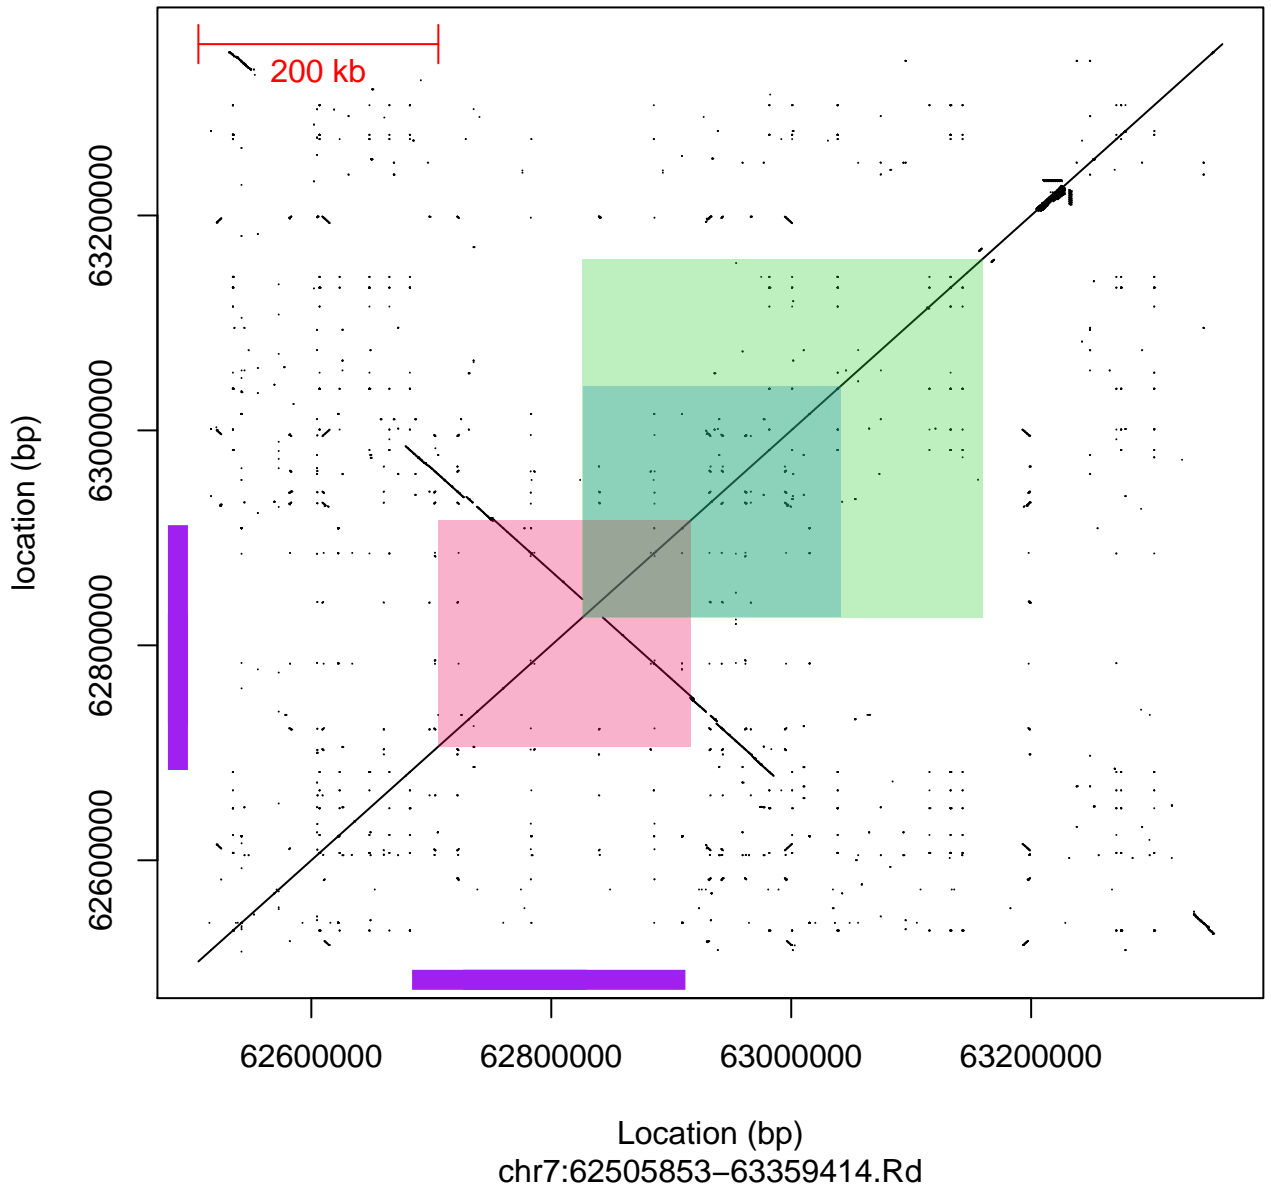

# Dotplot of mBM.7.3, ROIno.7.10, ROIno.7.11 on chr7

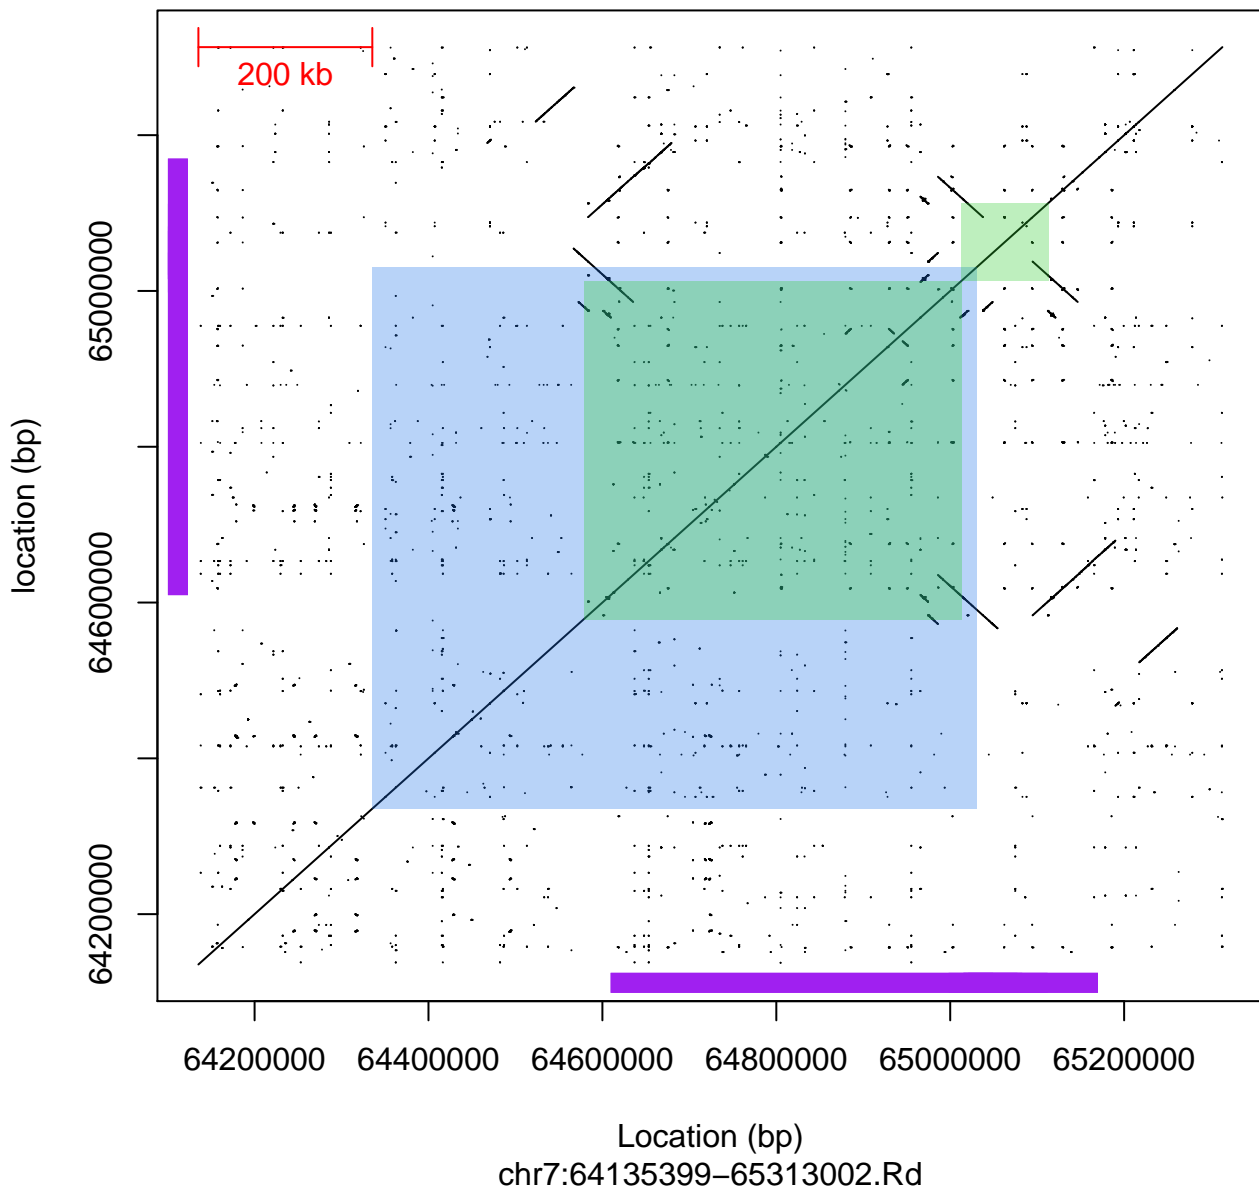

# Dotplot of mBM.7.4, ROIno.7.12 on chr7

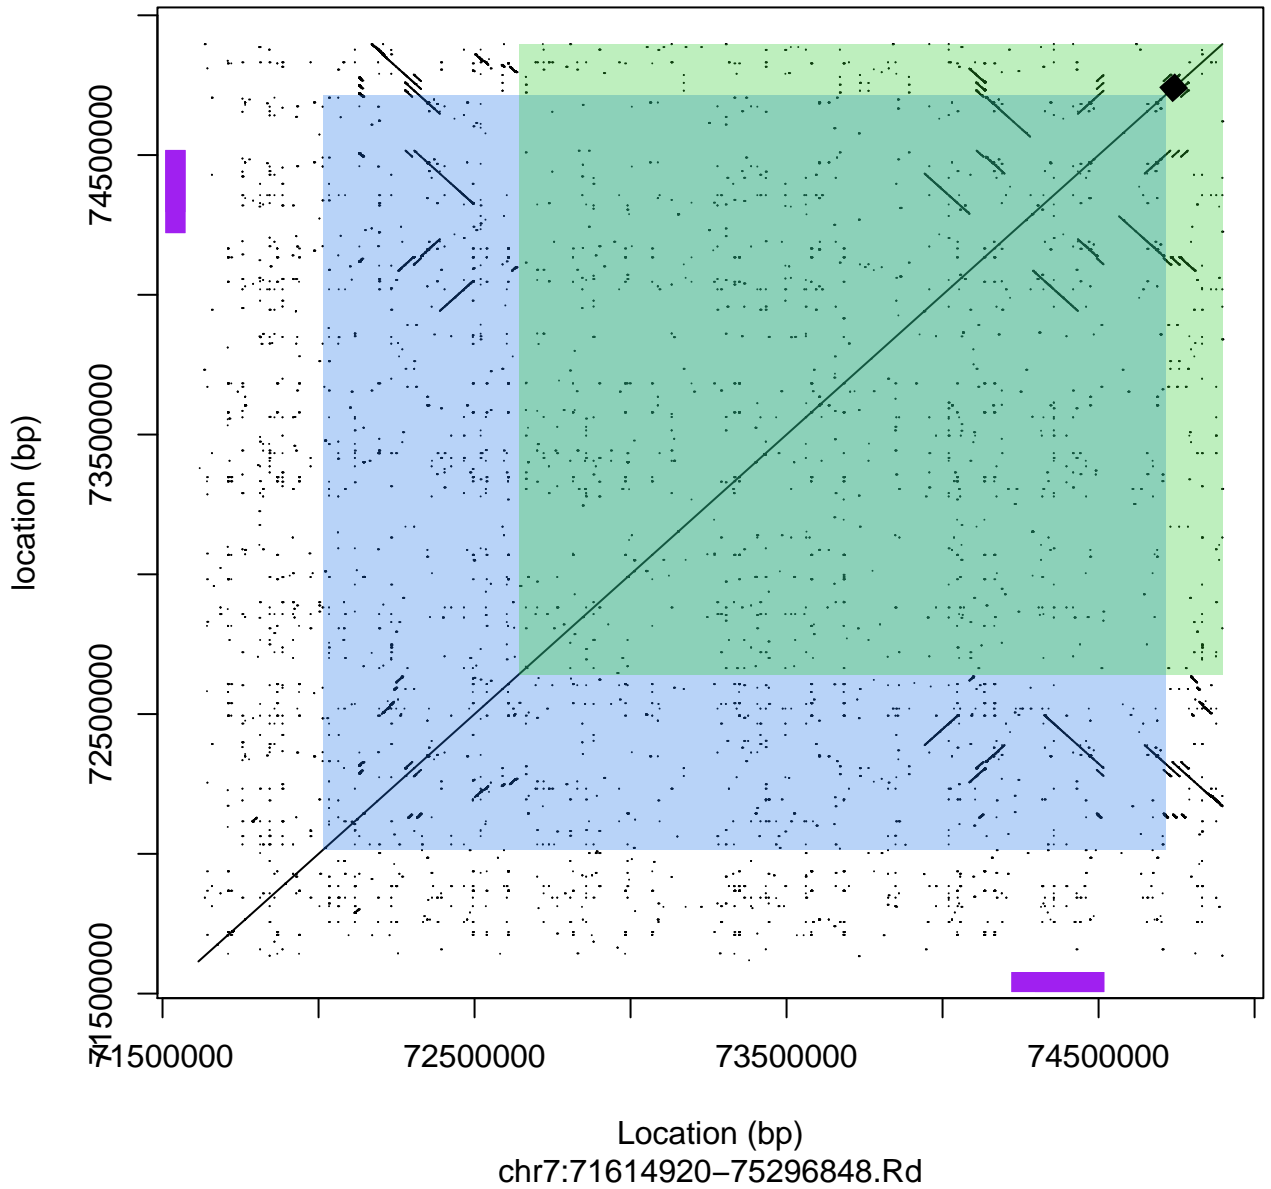

# Dotplot of mBM.7.5, fCB.7.4 on chr7

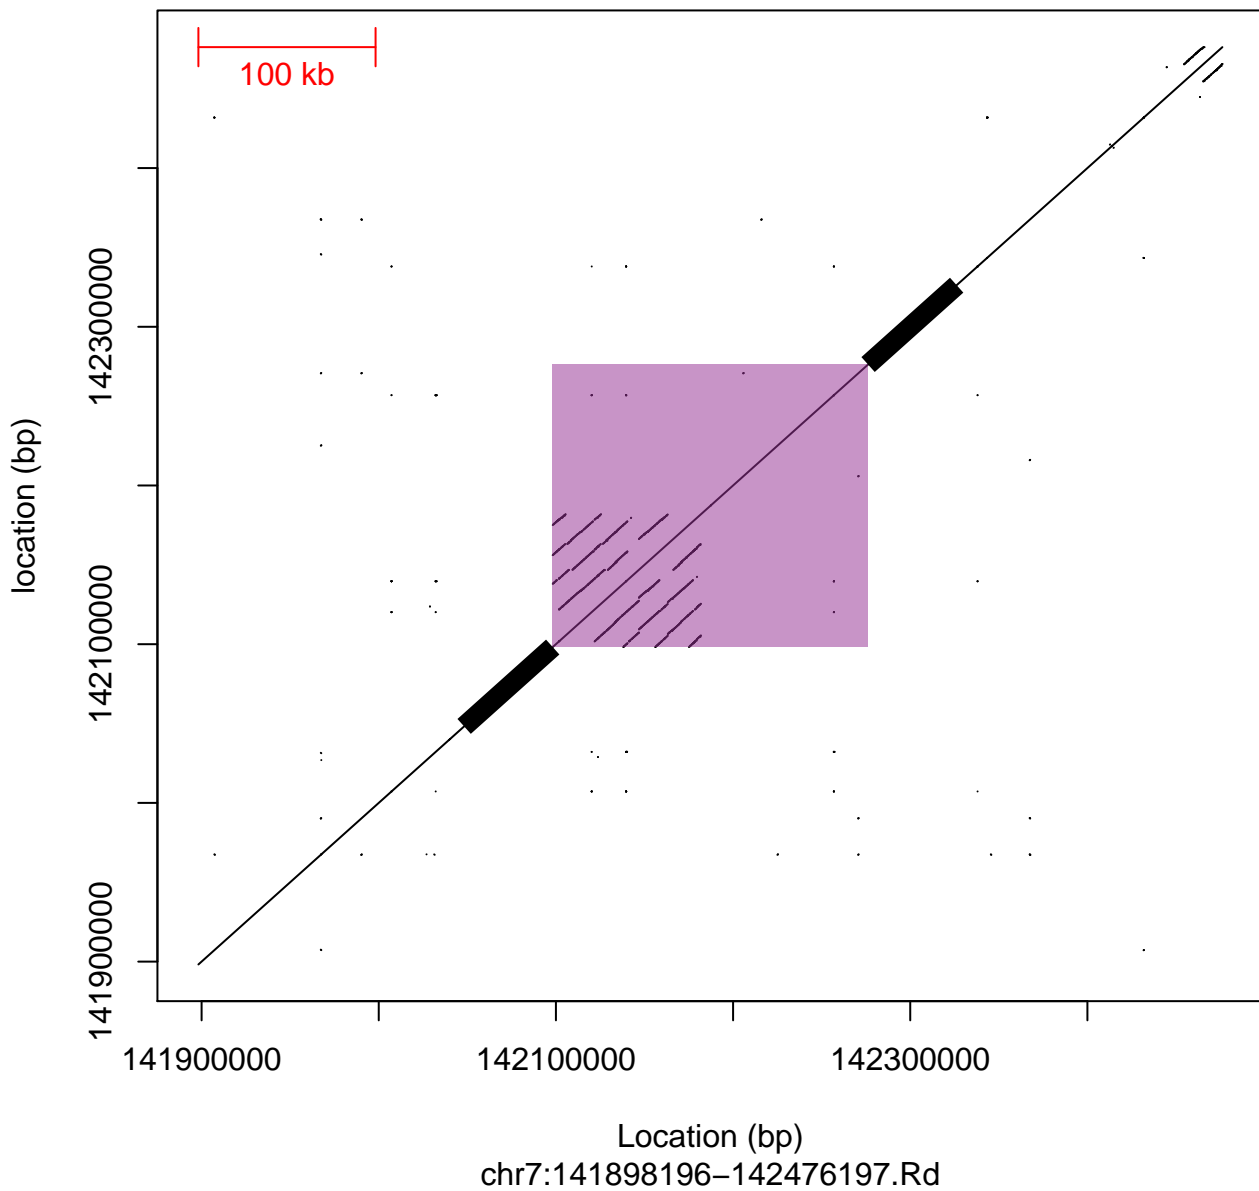

# Dotplot of mBM.7.6, ROIno.7.14 on chr7

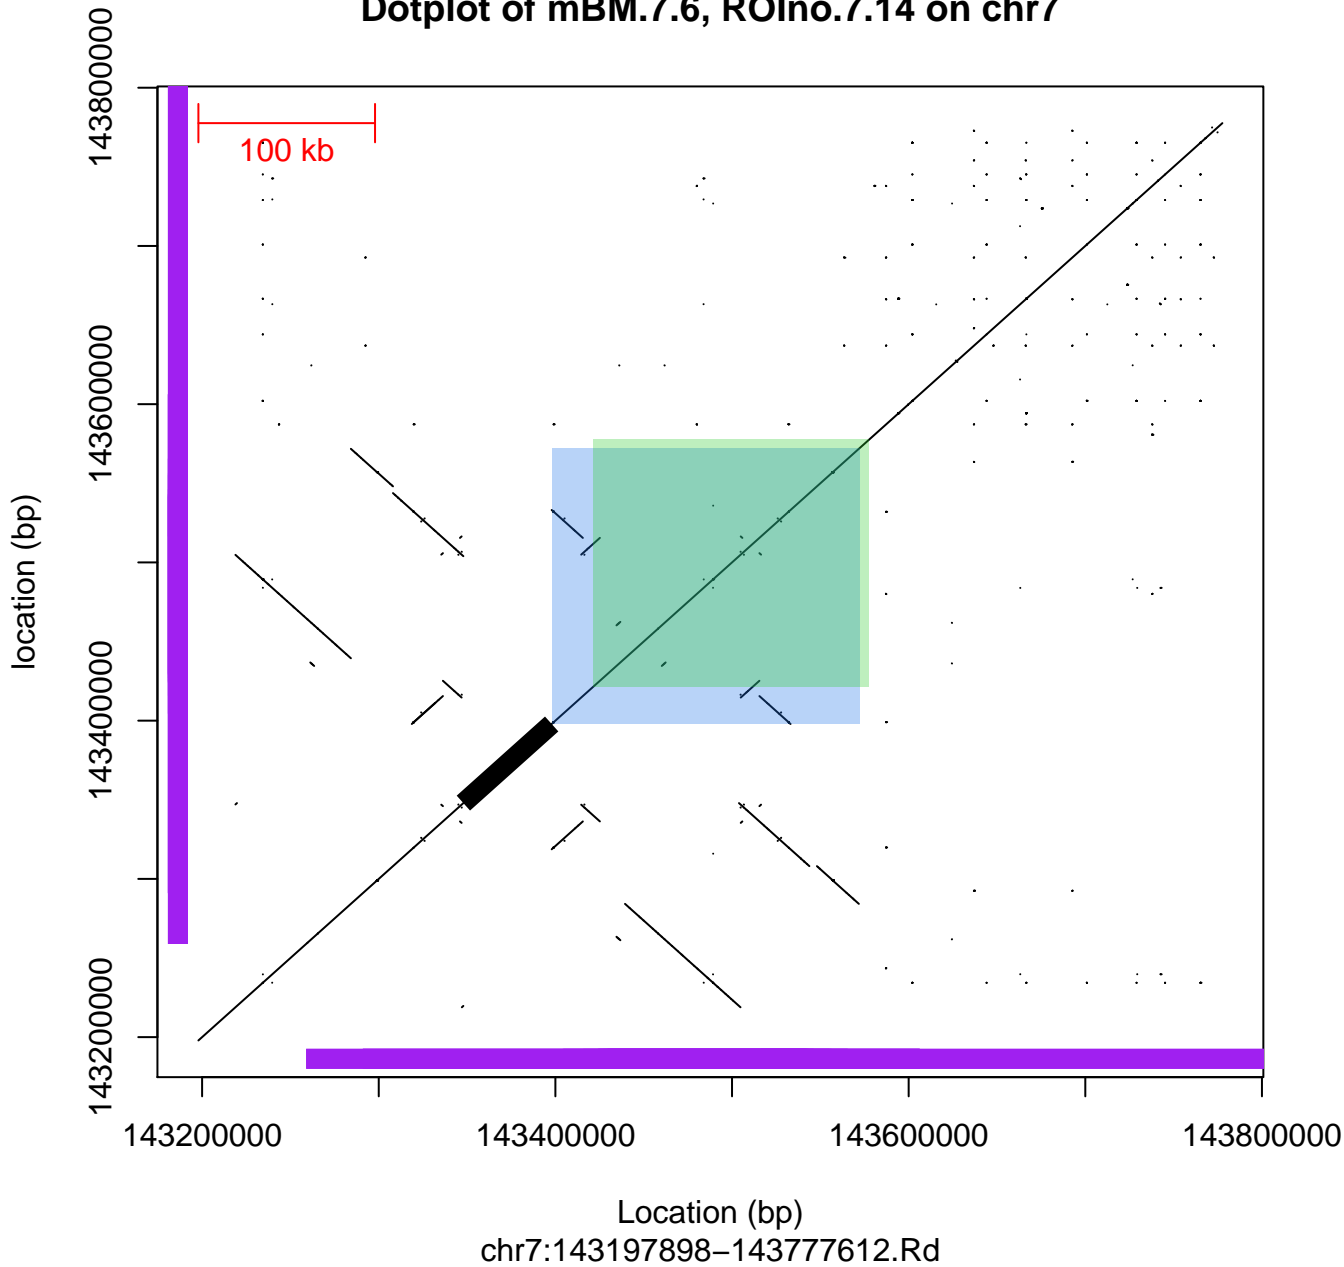

# Dotplot of mBM.7.7 on chr7

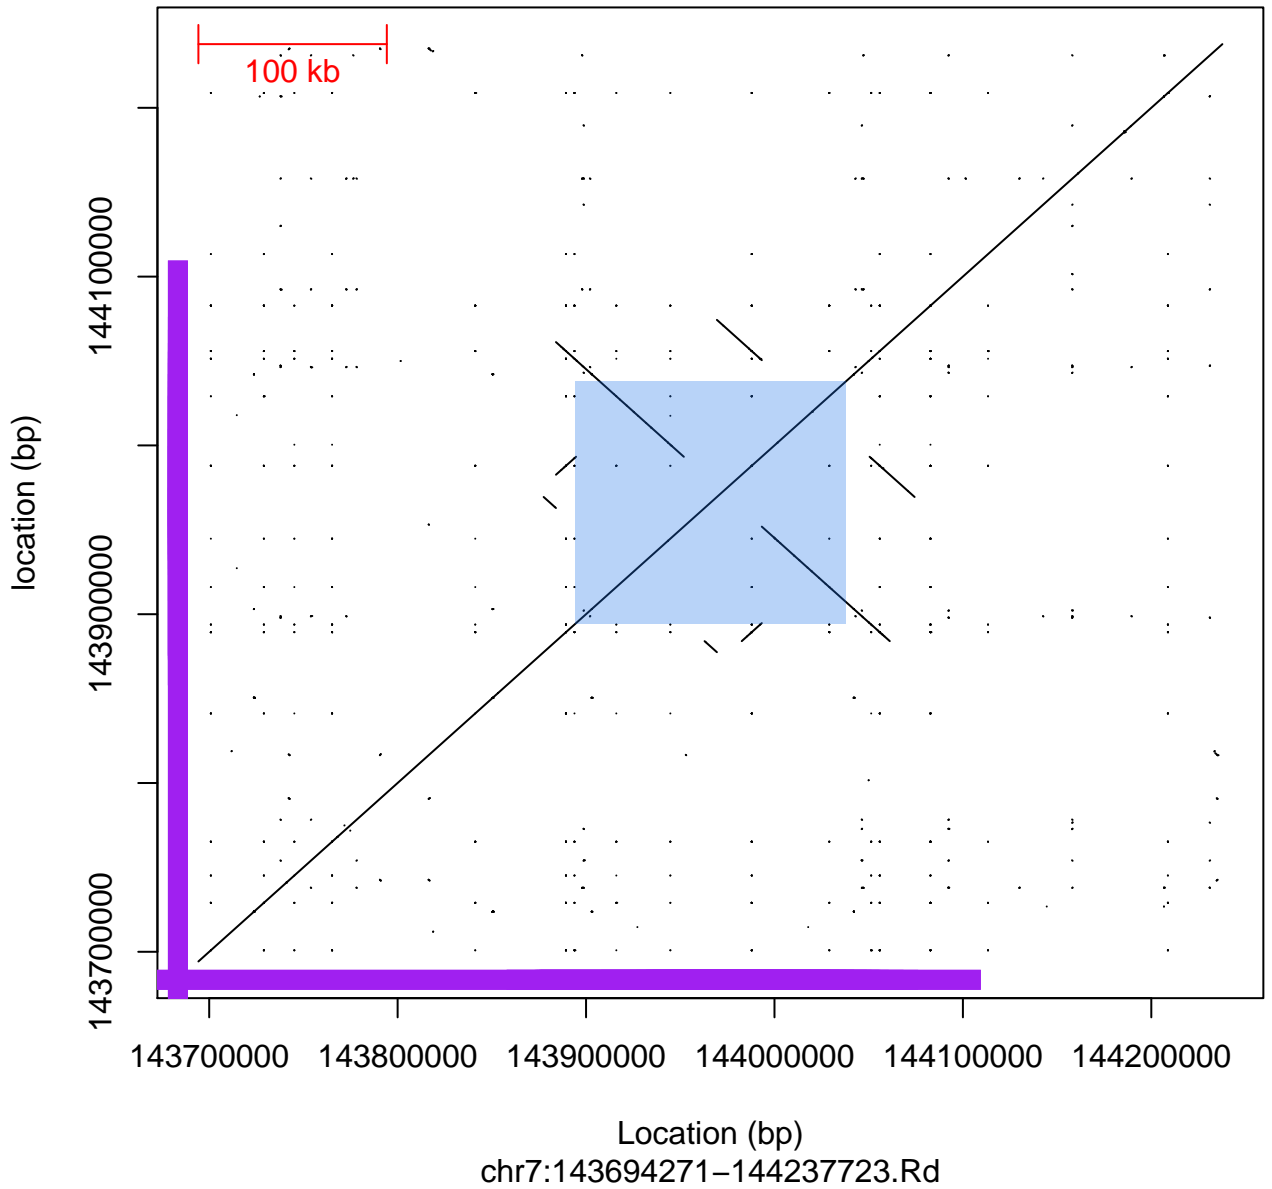

# Dotplot of ROIno.7.17 on chr7

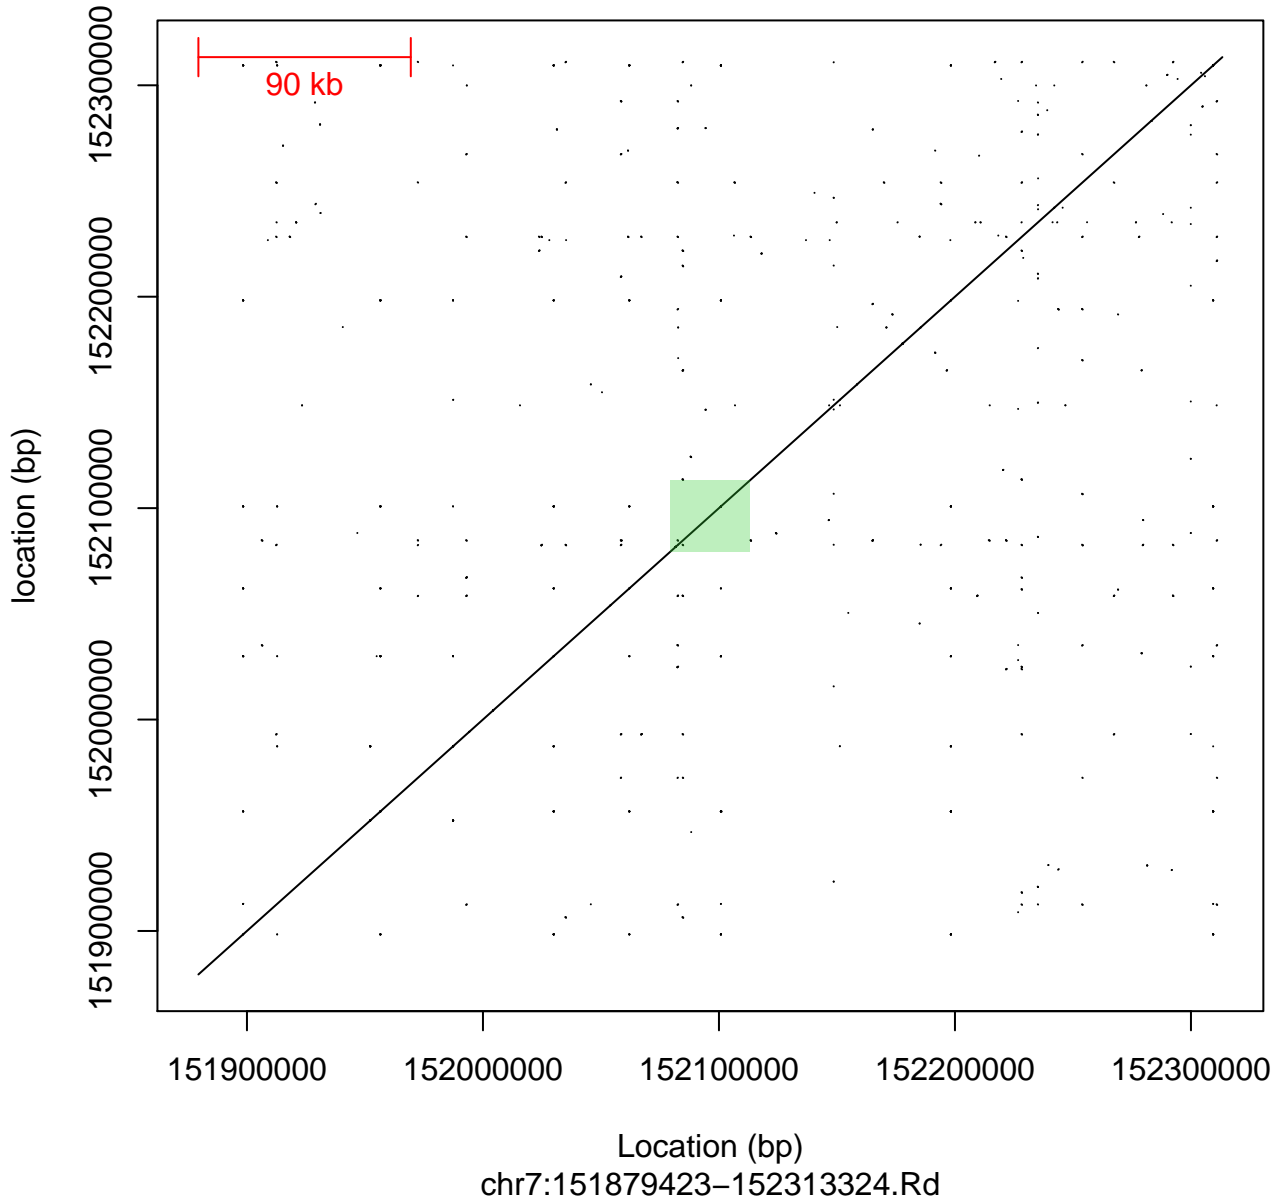



# Dotplot of mBM.8.1, ROIno.8.3 on chr8

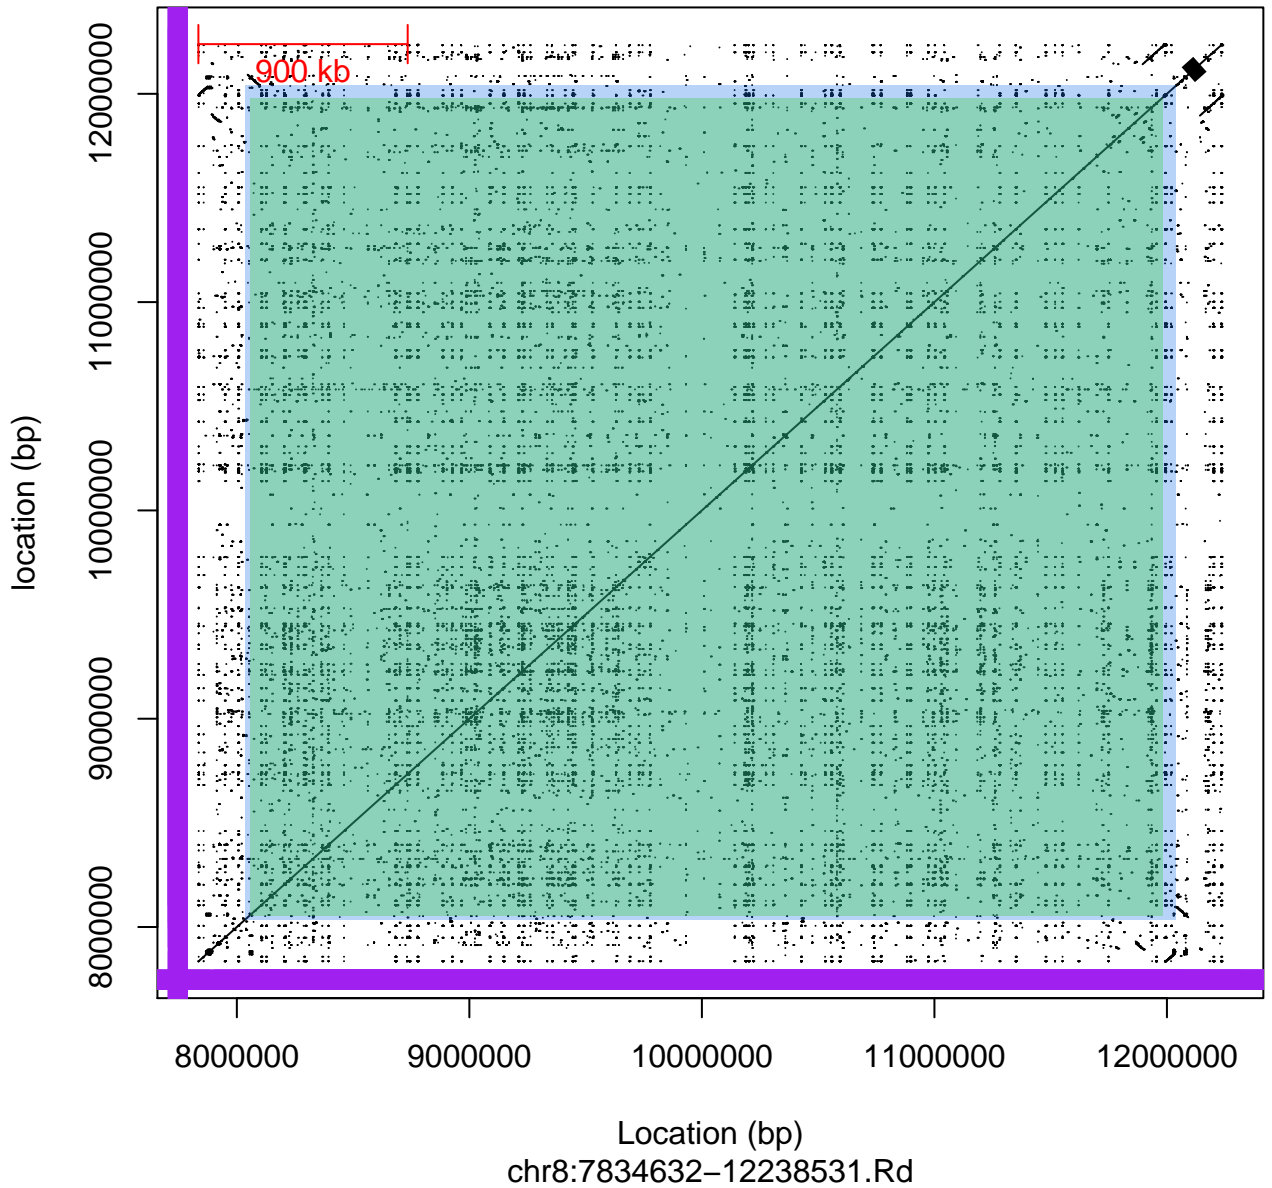

# Dotplot of ROIno.9.3 on chr9

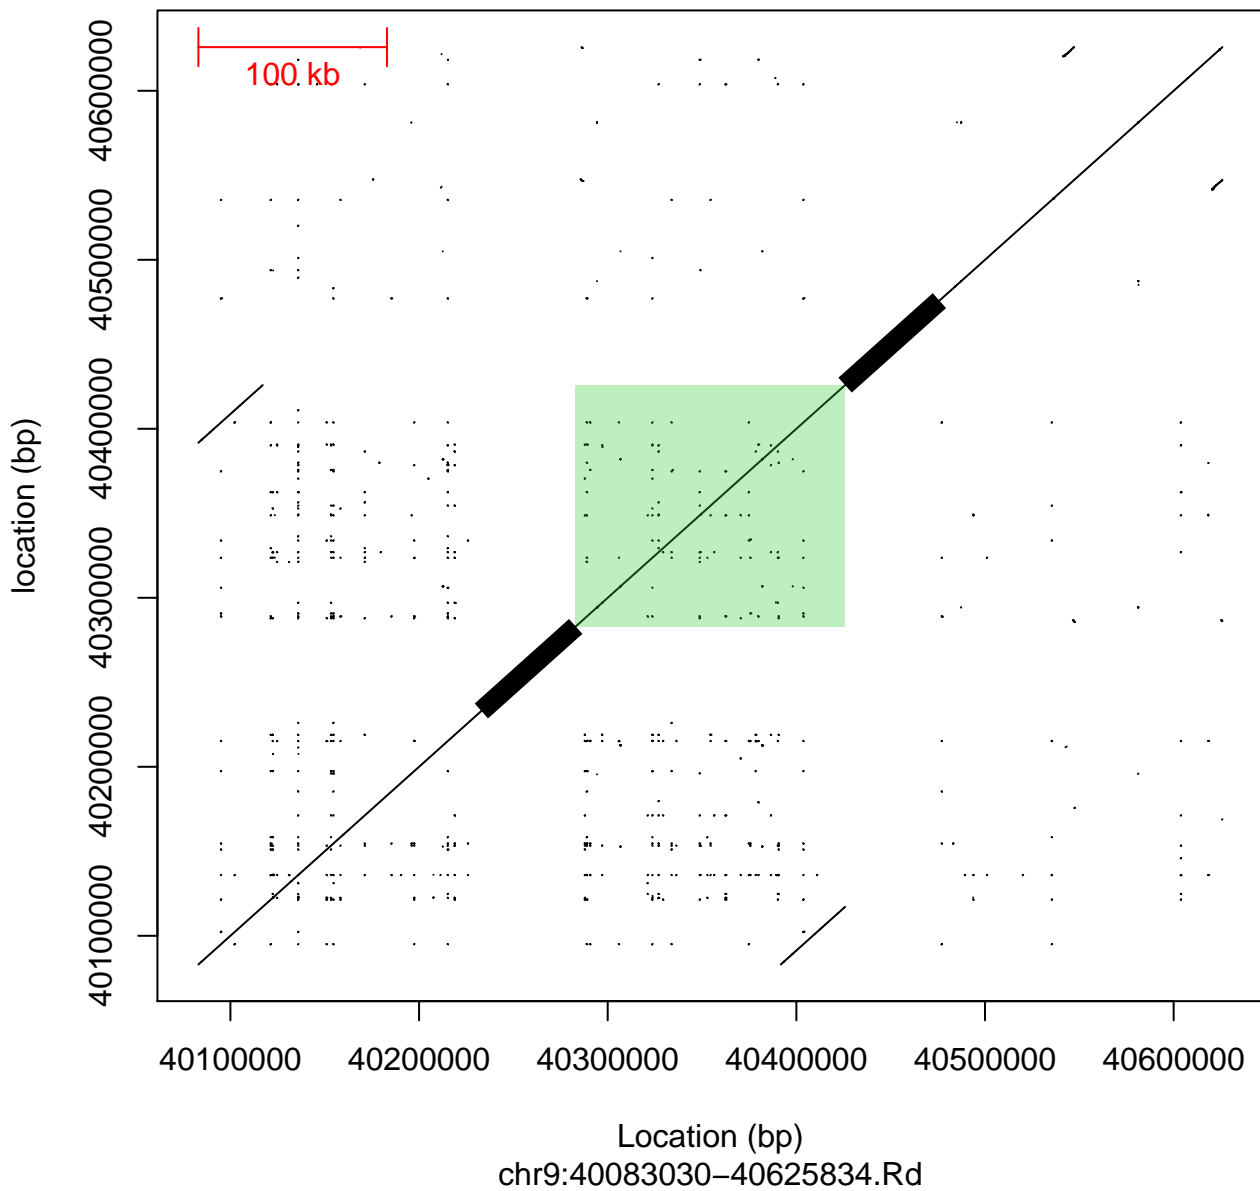

# Dotplot of mBM.9.1, fCB.9.1, ROIno.9.3, ROIno.9.4 on chr9

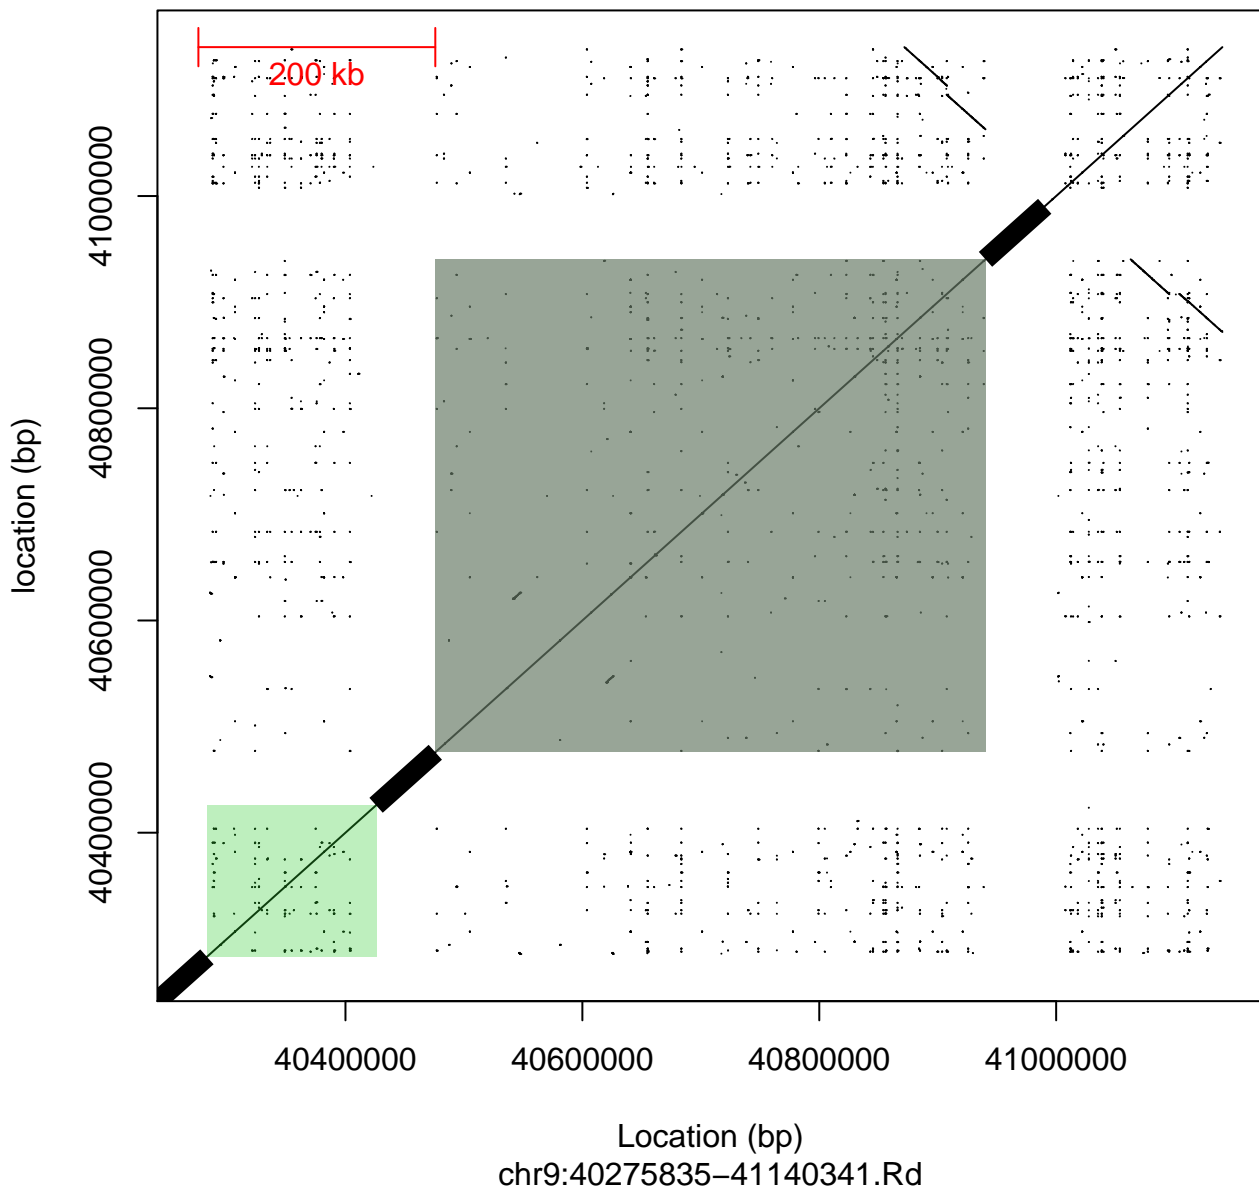

# Dotplot of mBM.9.2, ROIno.9.8 on chr9

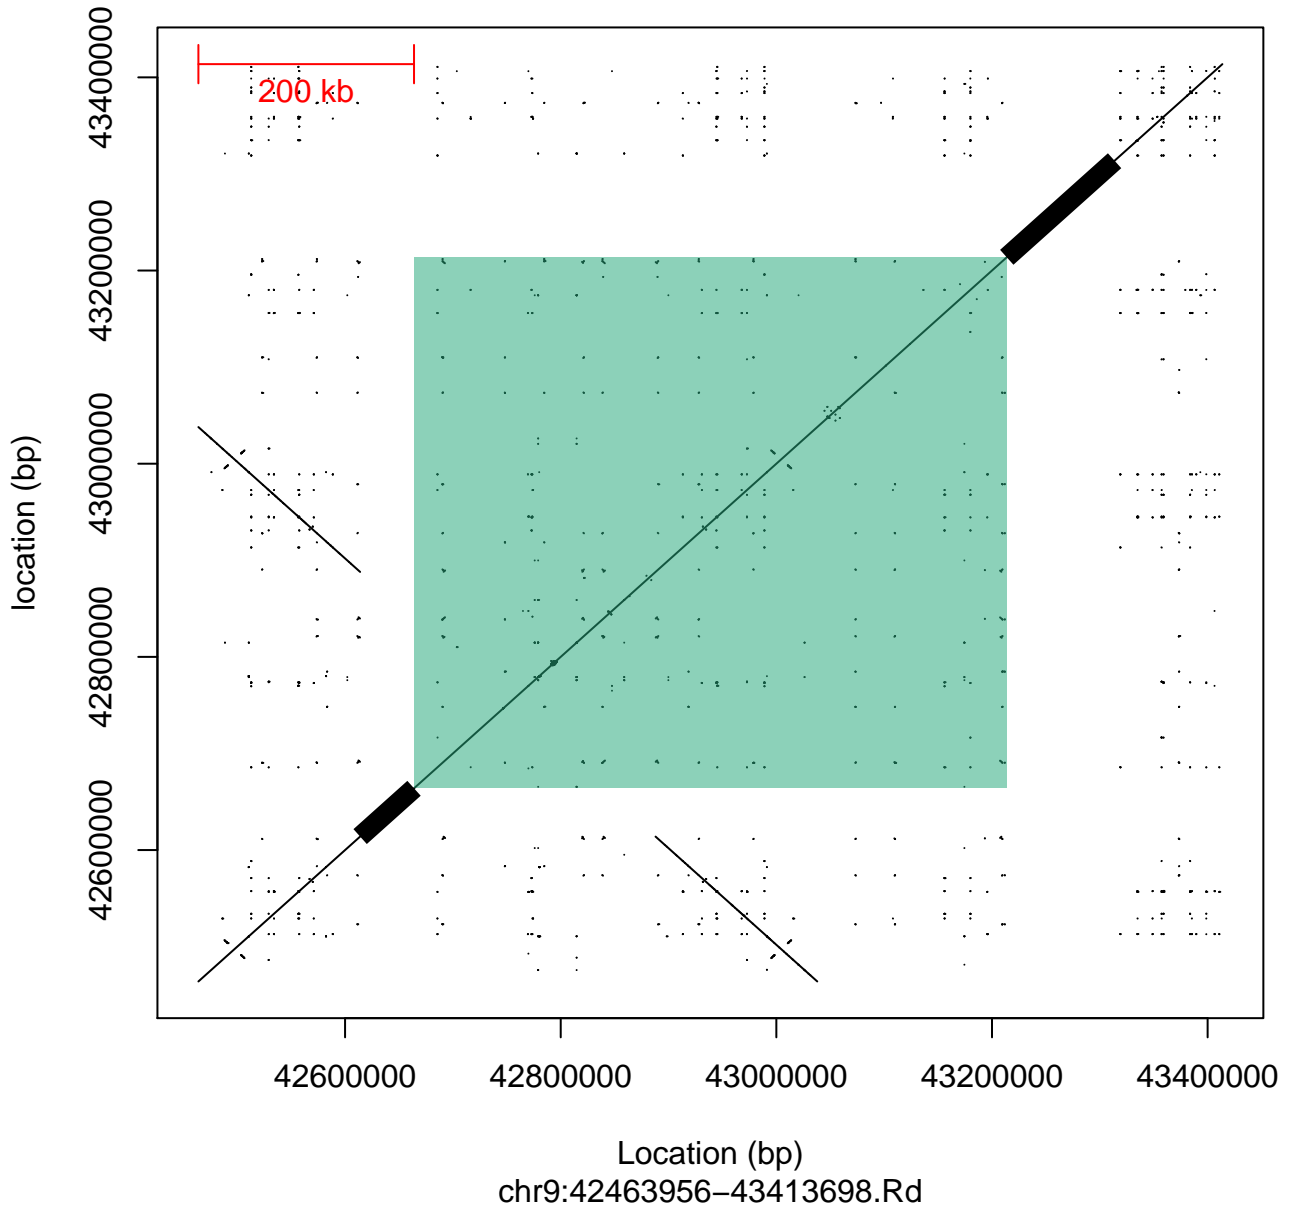

# Dotplot of mBM.9.3, ROIno.9.9 on chr9

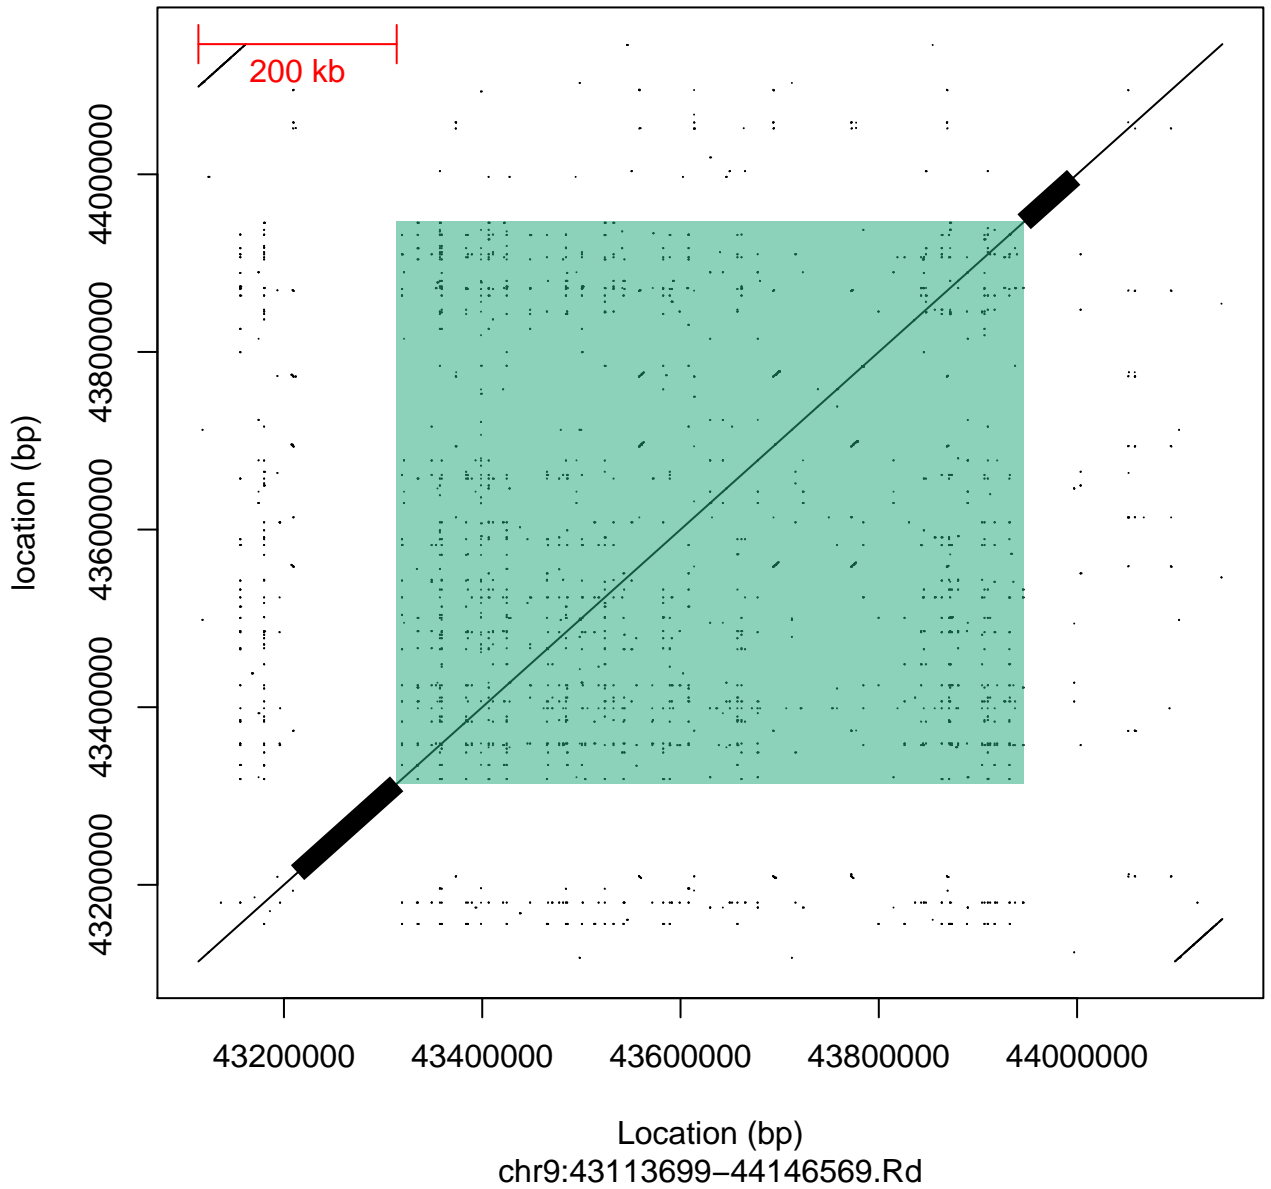

# Dotplot of mBM.9.4, fCB.9.2 on chr9

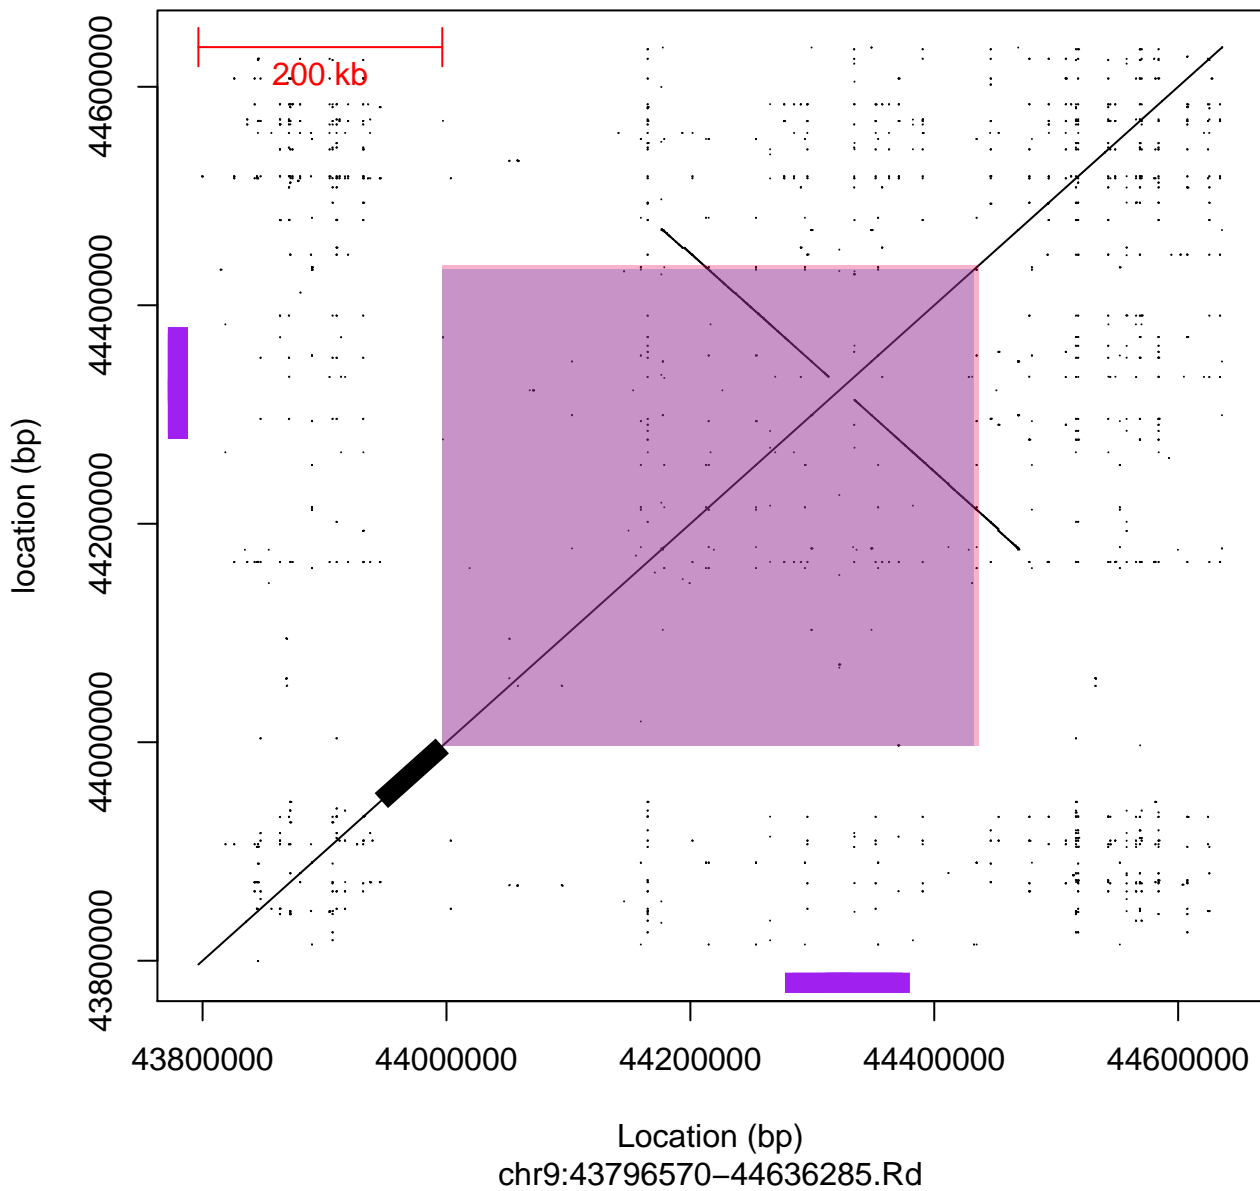

# Dotplot of ROIno.9.11 on chr9

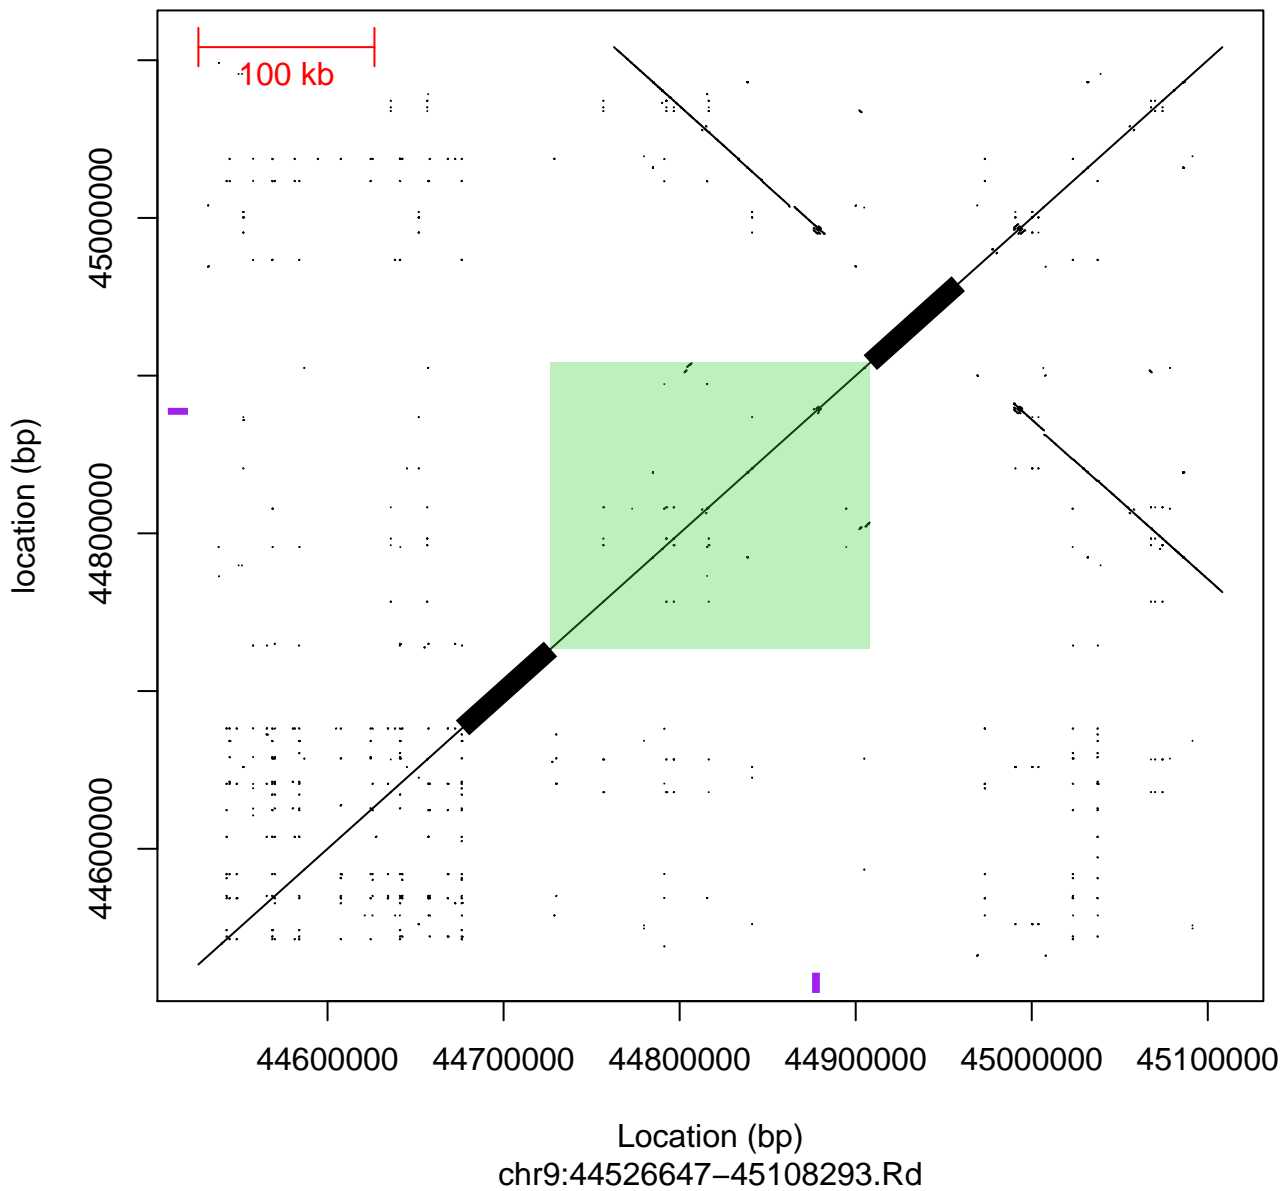

# Dotplot of mBM.9.5, fCB.9.3, ROIno.9.12 on chr9

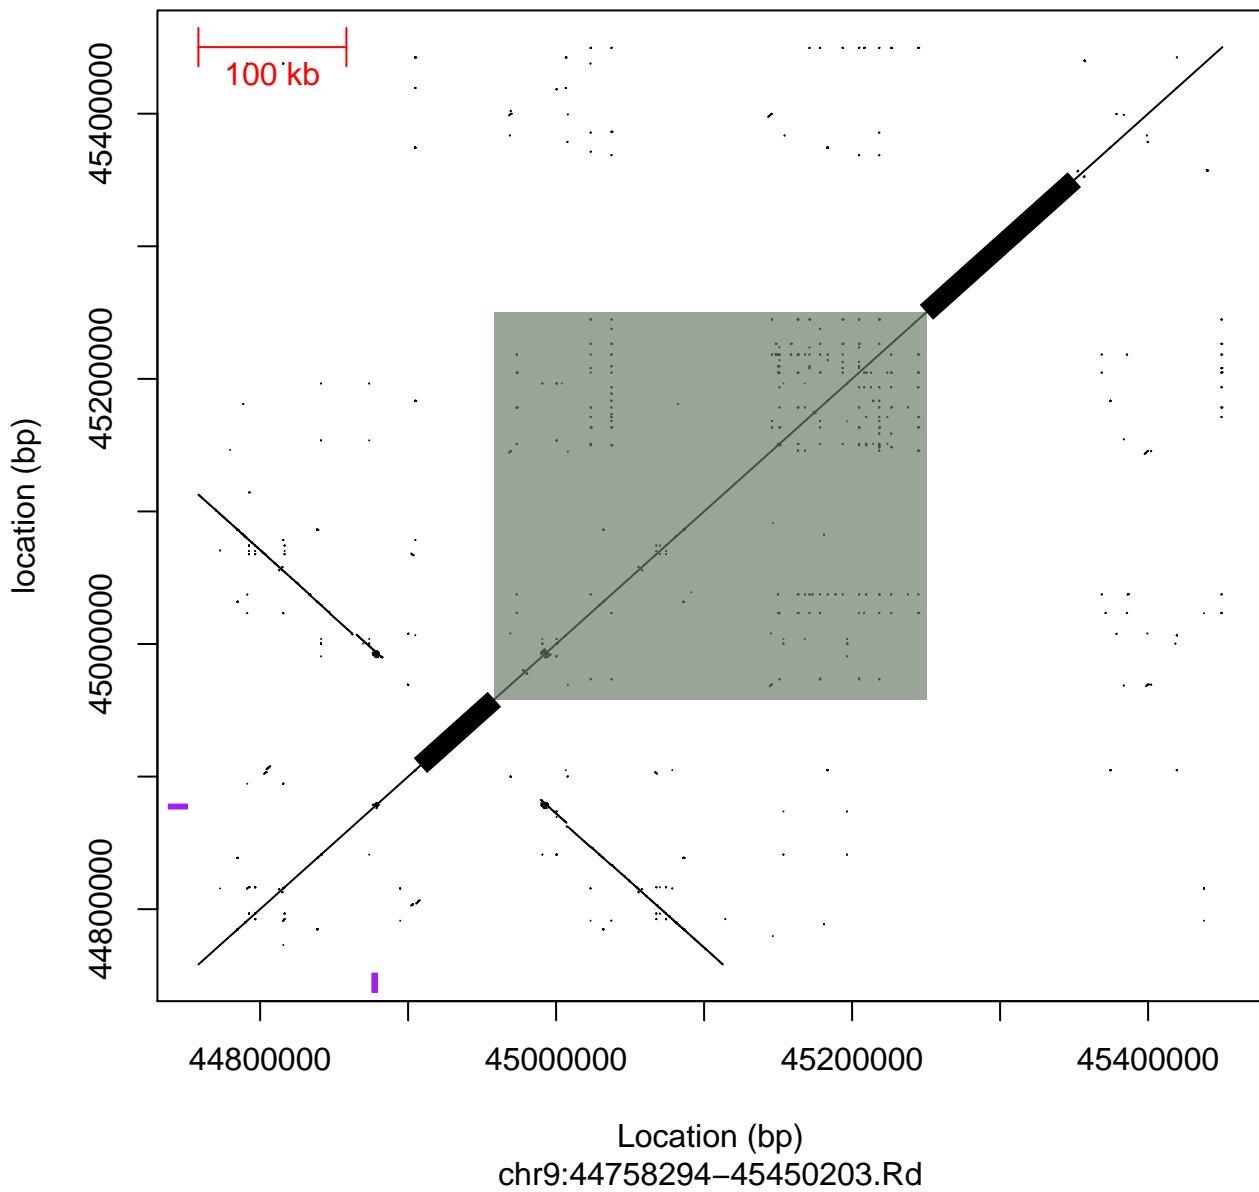



# Dotplot of mBM.9.6, ROIno.9.14 on chr9

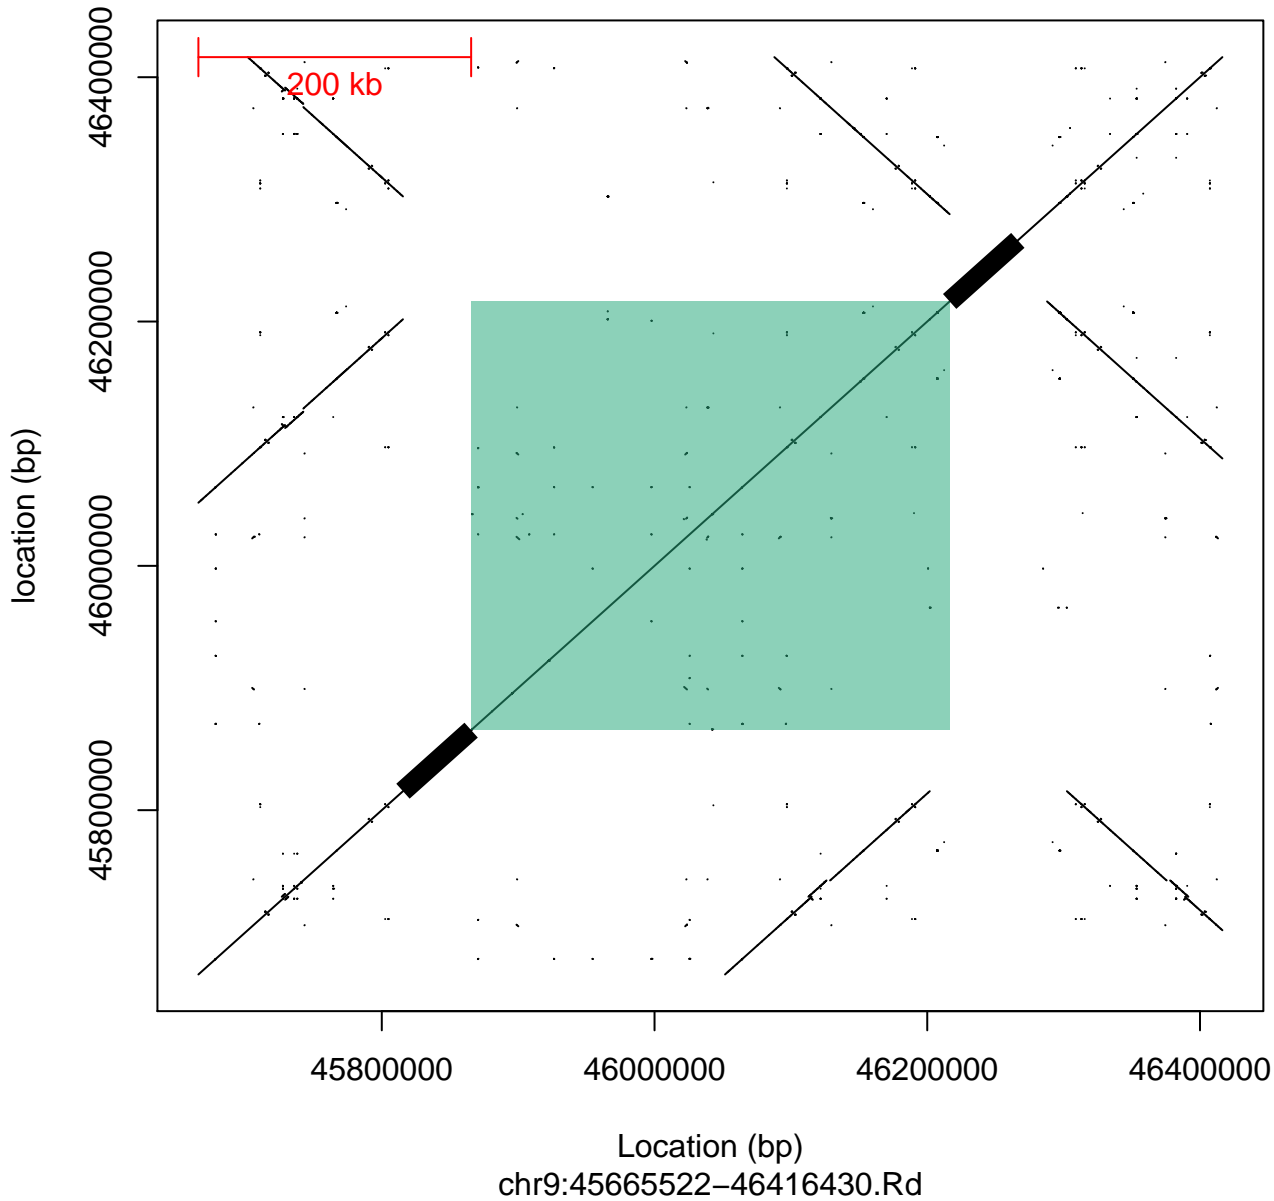

# Dotplot of ROIno.9.15 on chr9

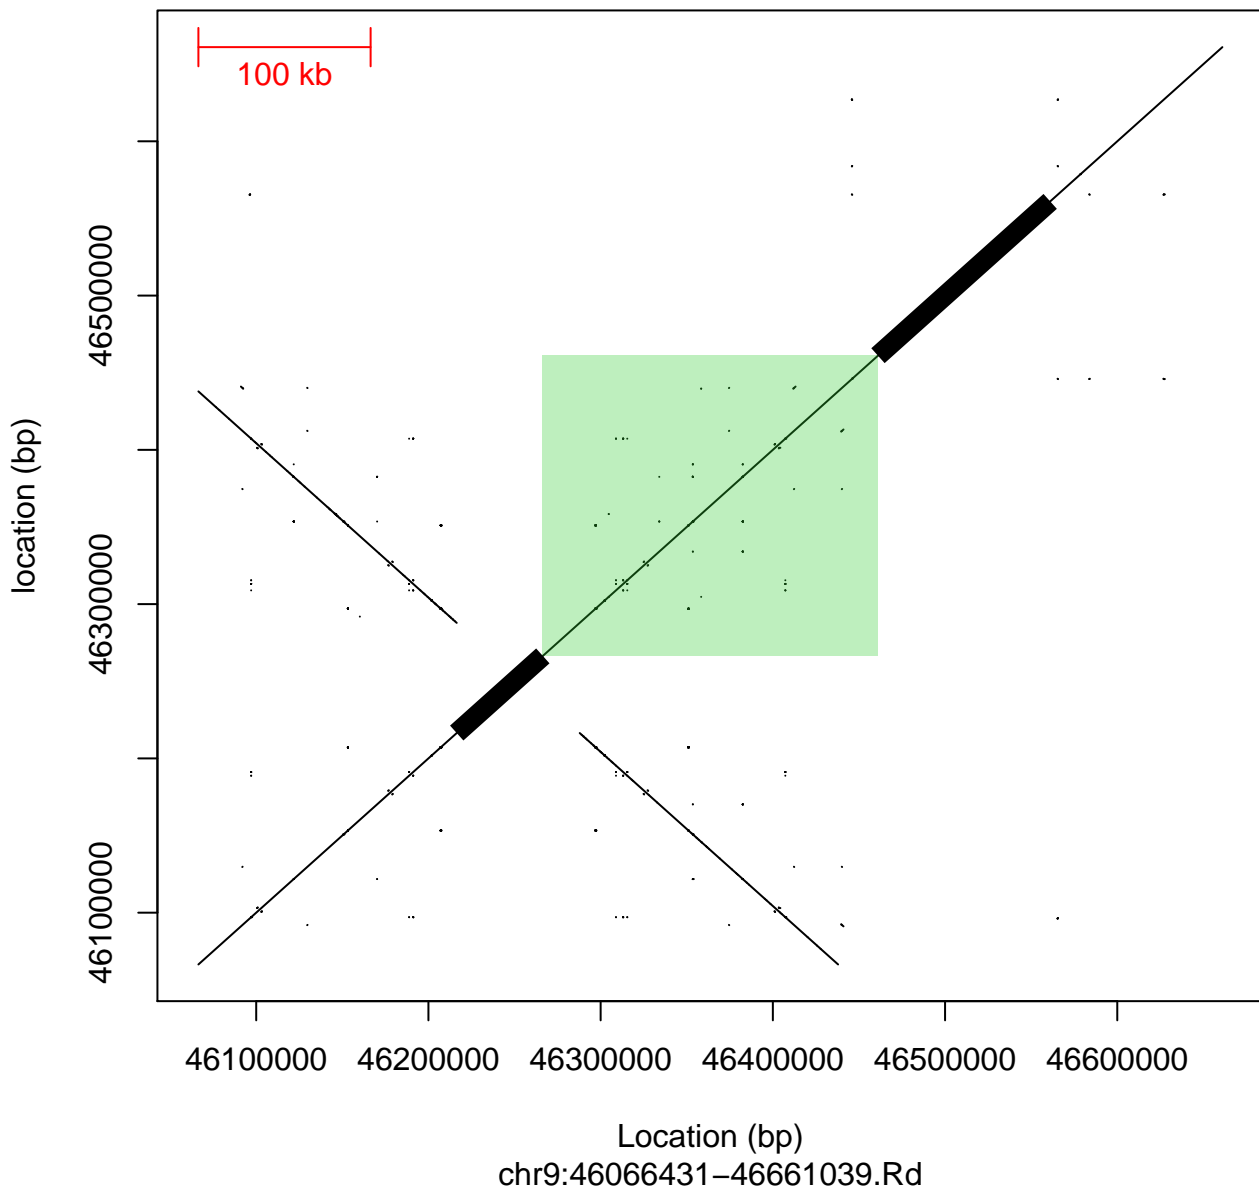

# Dotplot of mBM.9.7, fCB.9.4, ROIno.9.17 on chr9

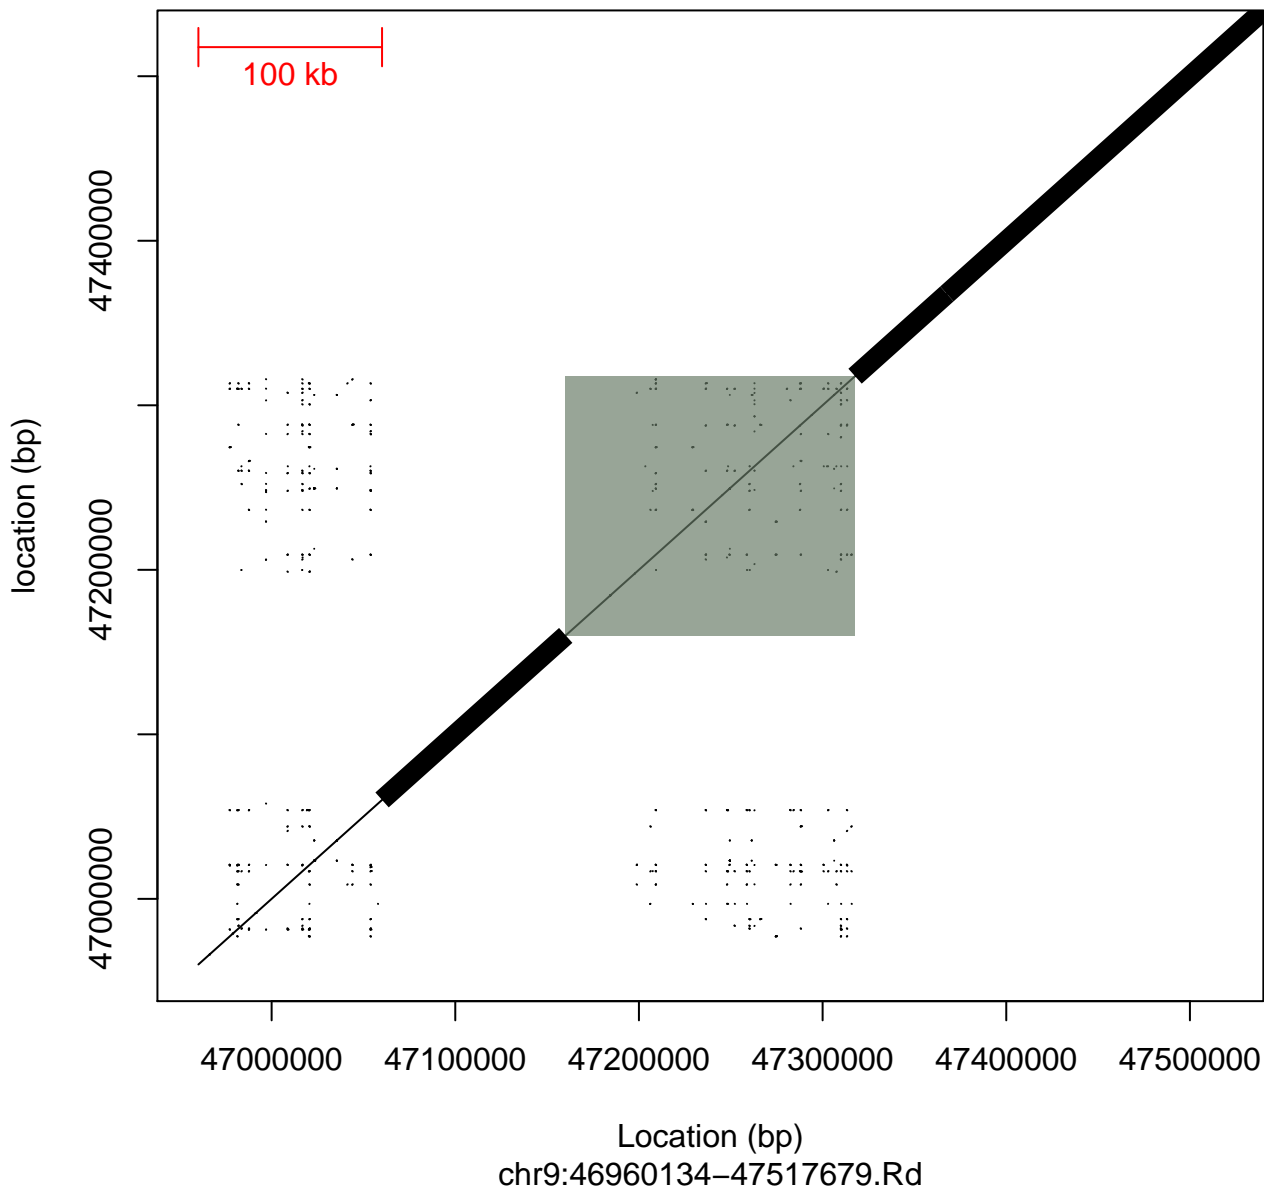

# Dotplot of mBM.9.8, ROIno.9.18 on chr9

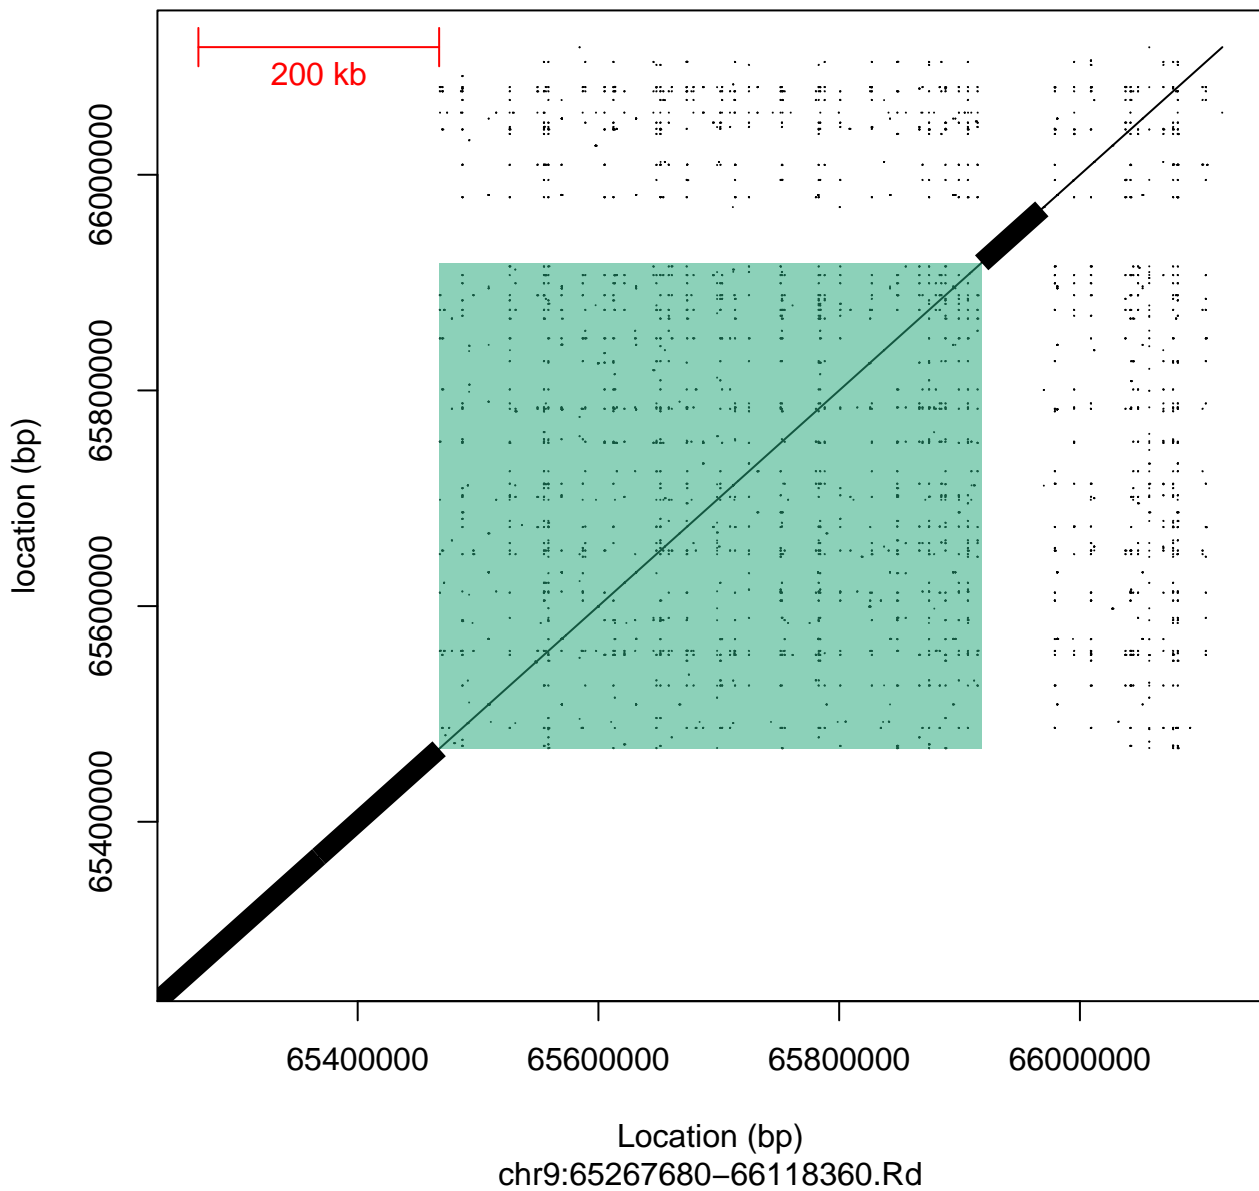

# Dotplot of mBM.9.9 on chr9

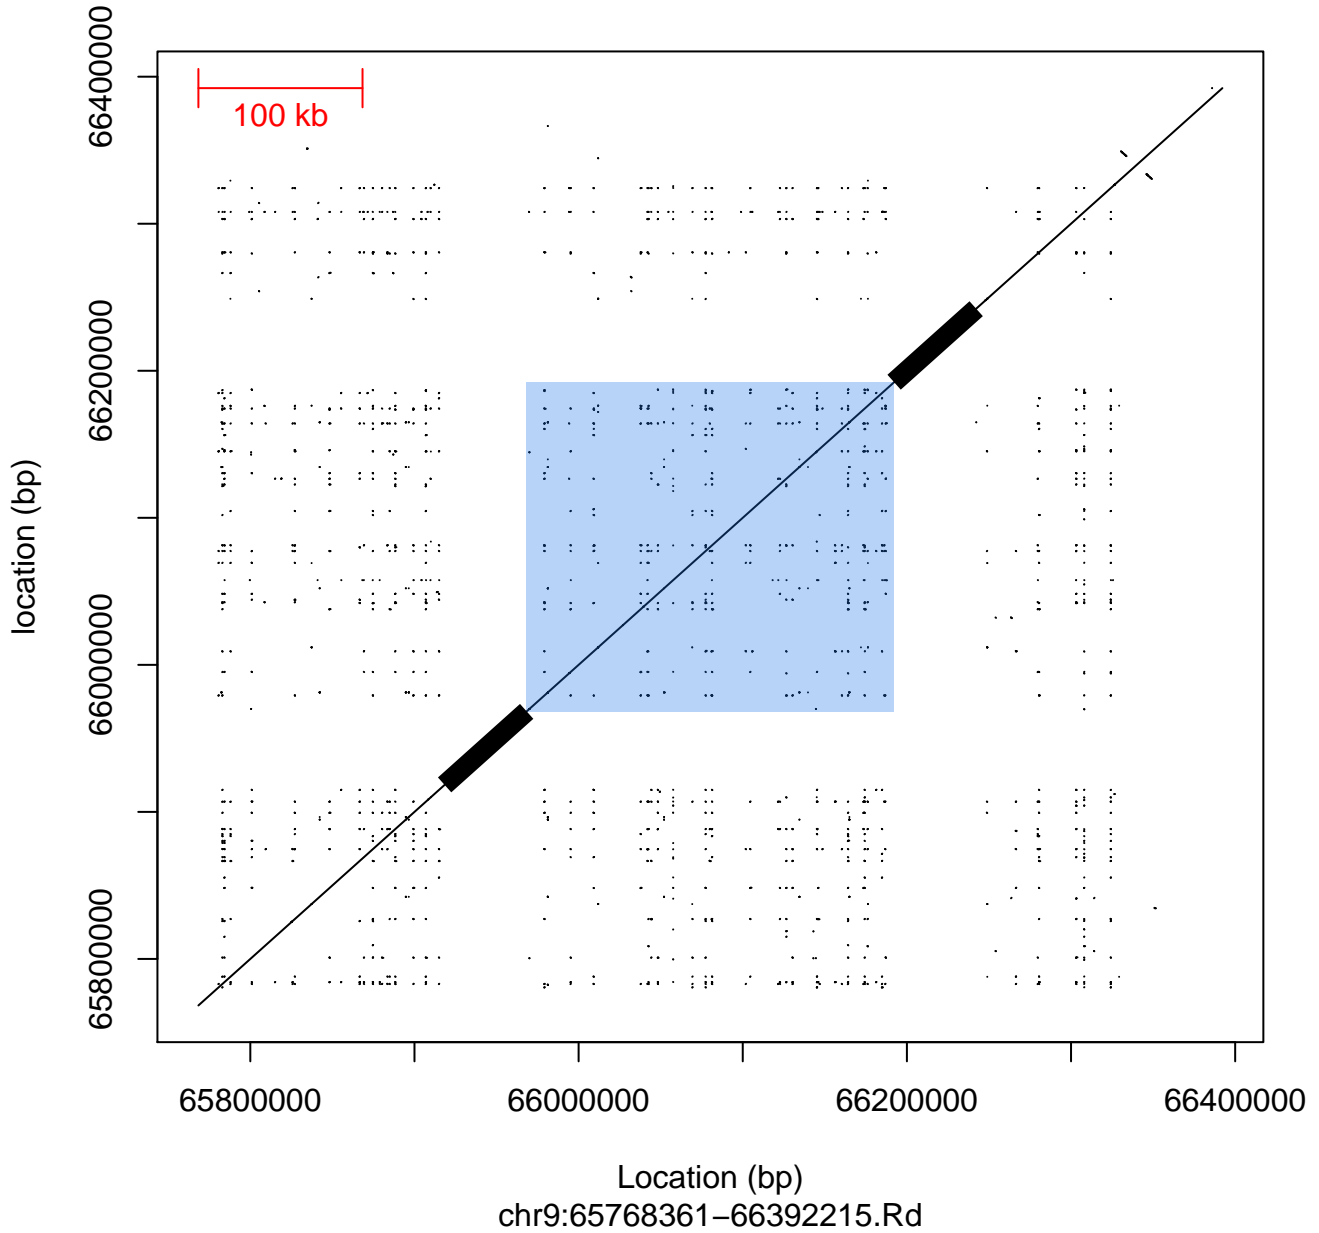

# Dotplot of mBM.9.10, fCB.9.5 on chr9

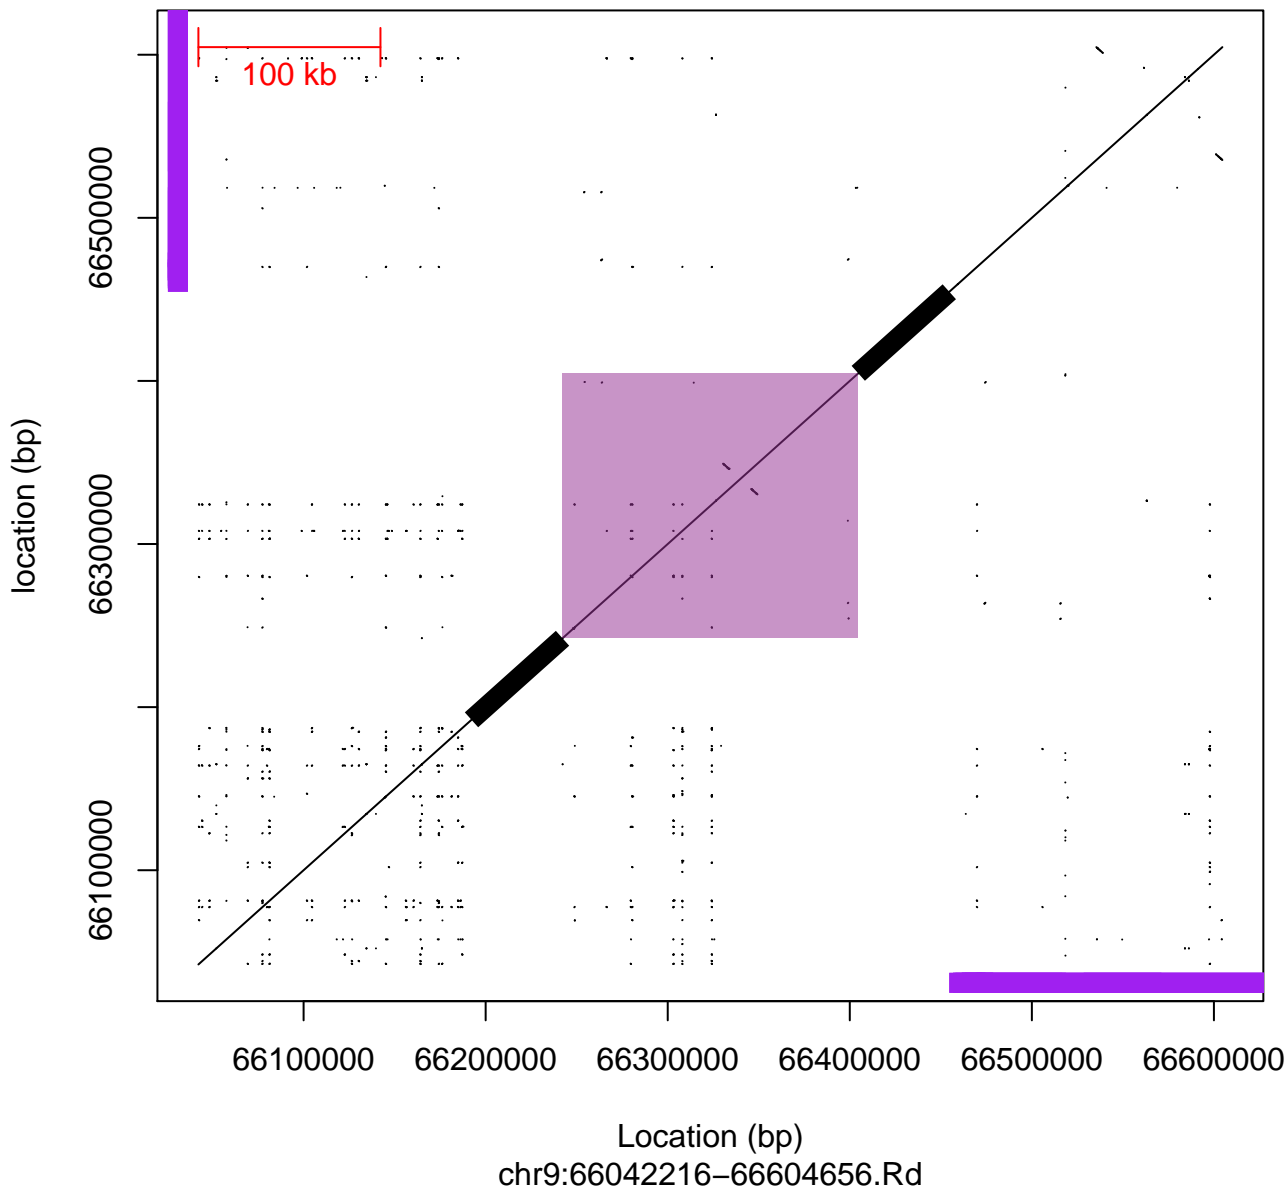

# Dotplot of mBM.9.11, fCB.9.6, ROIno.9.22 on chr9

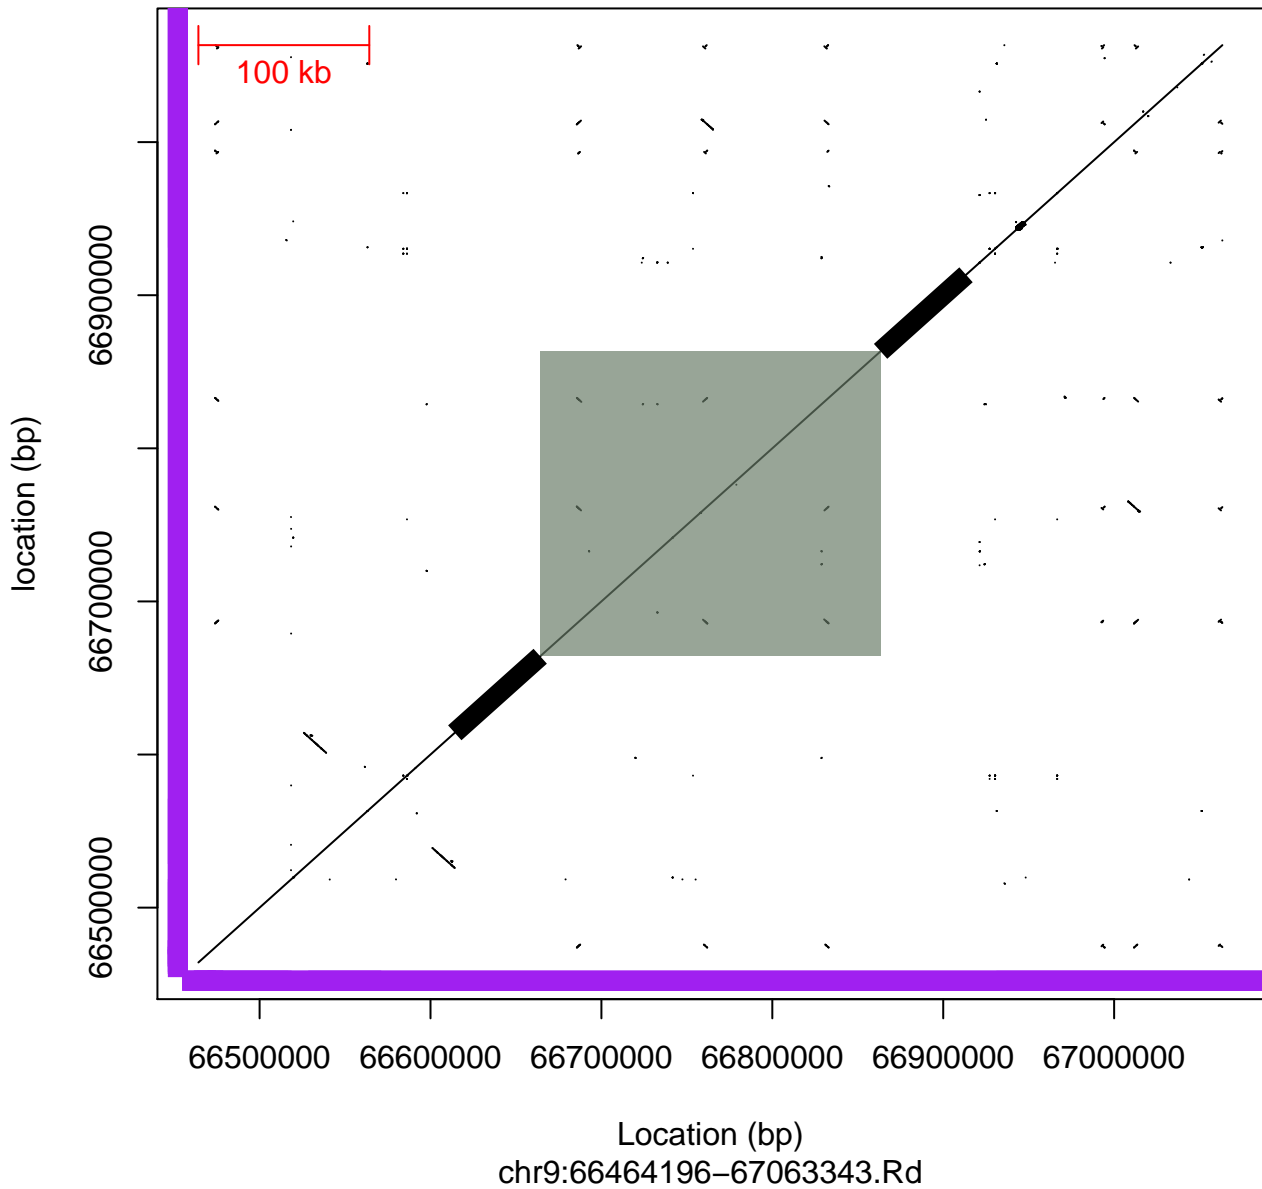

# Dotplot of mBM.9.12 on chr9

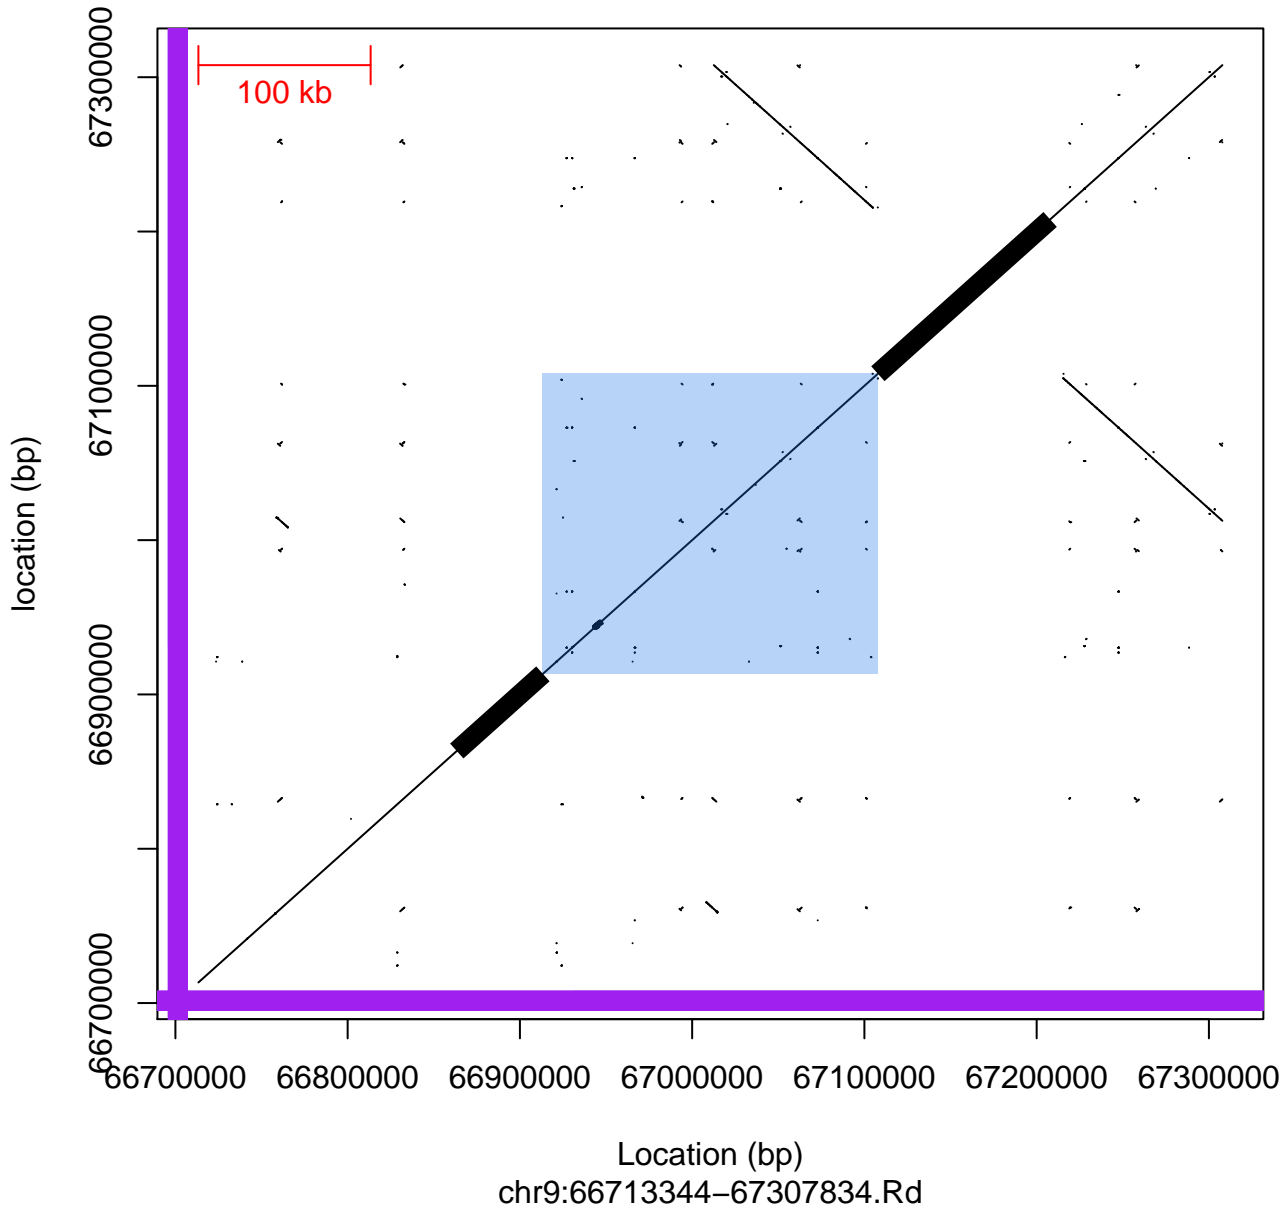



# Dotplot of ROIno.9.25 on chr9

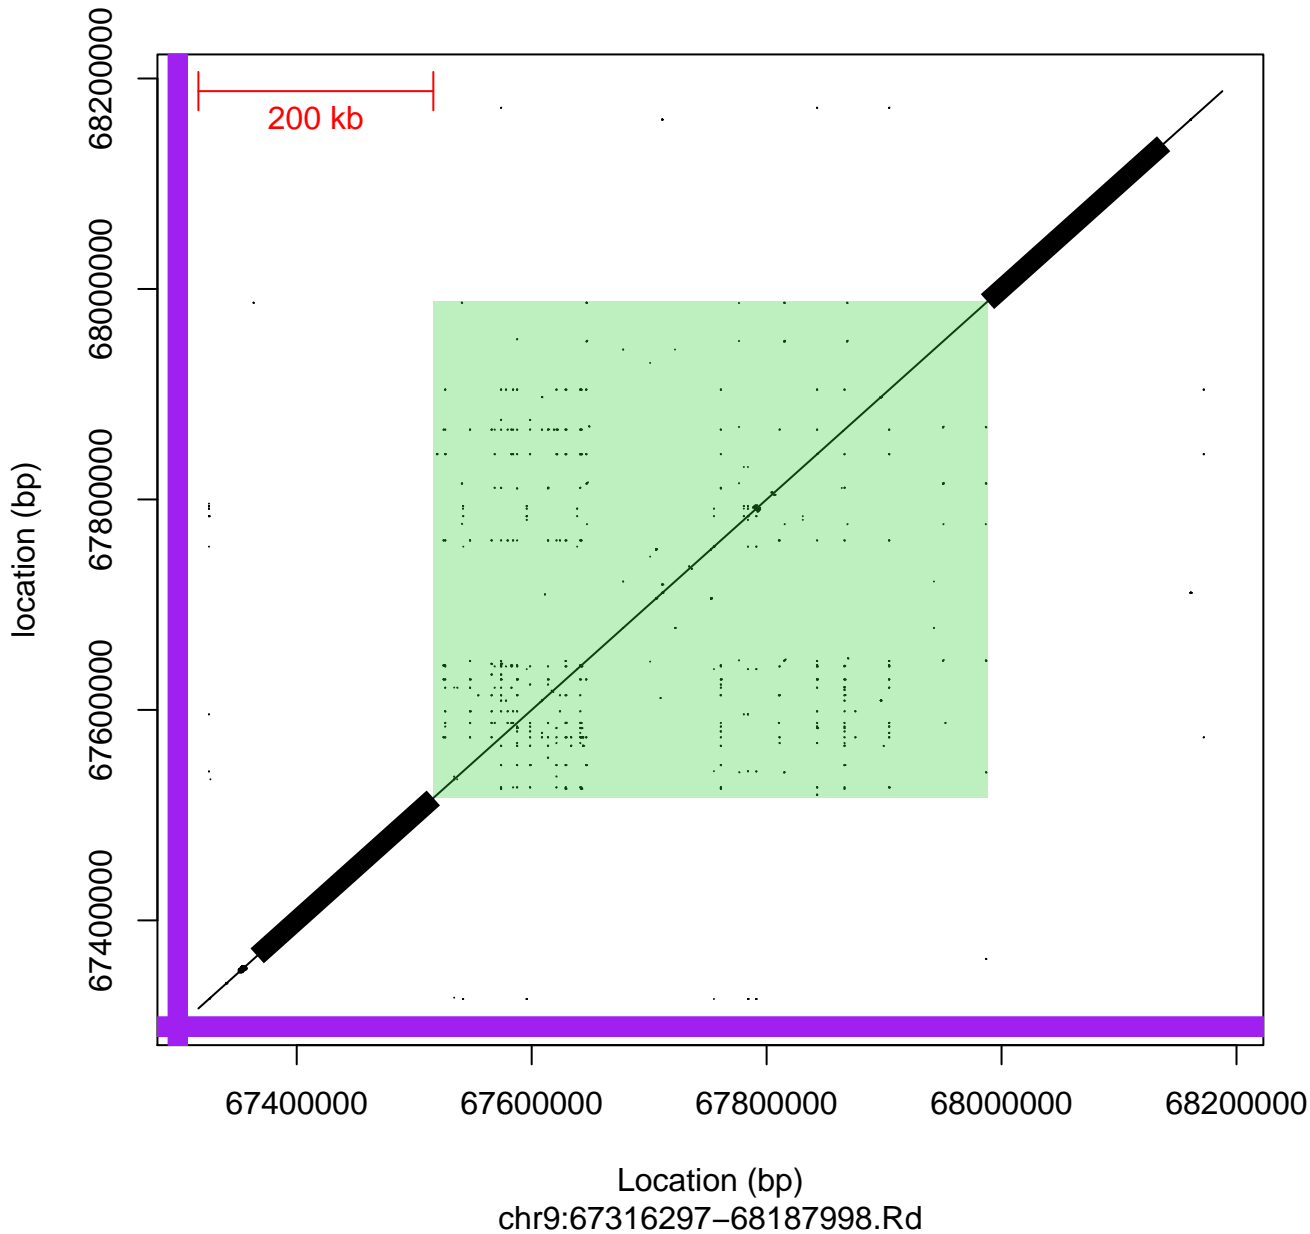

# Dotplot of mBM.9.13, fCB.9.7, ROIno.9.27 on chr9

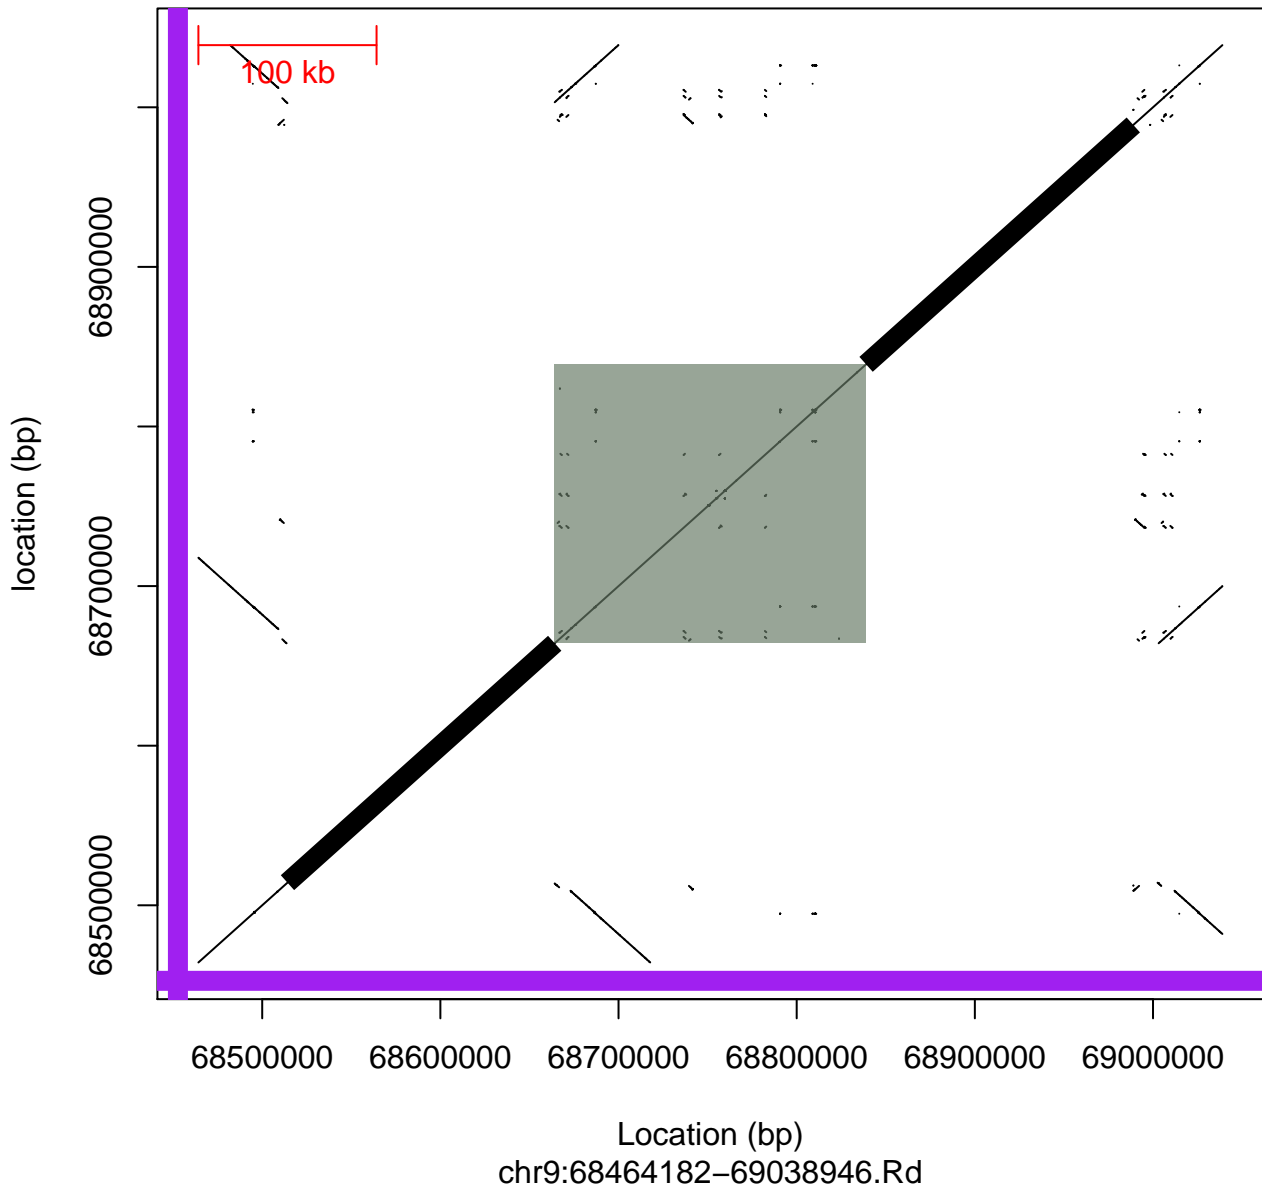

# Dotplot of mBM.9.14, fCB.9.8, ROIno.9.28 on chr9

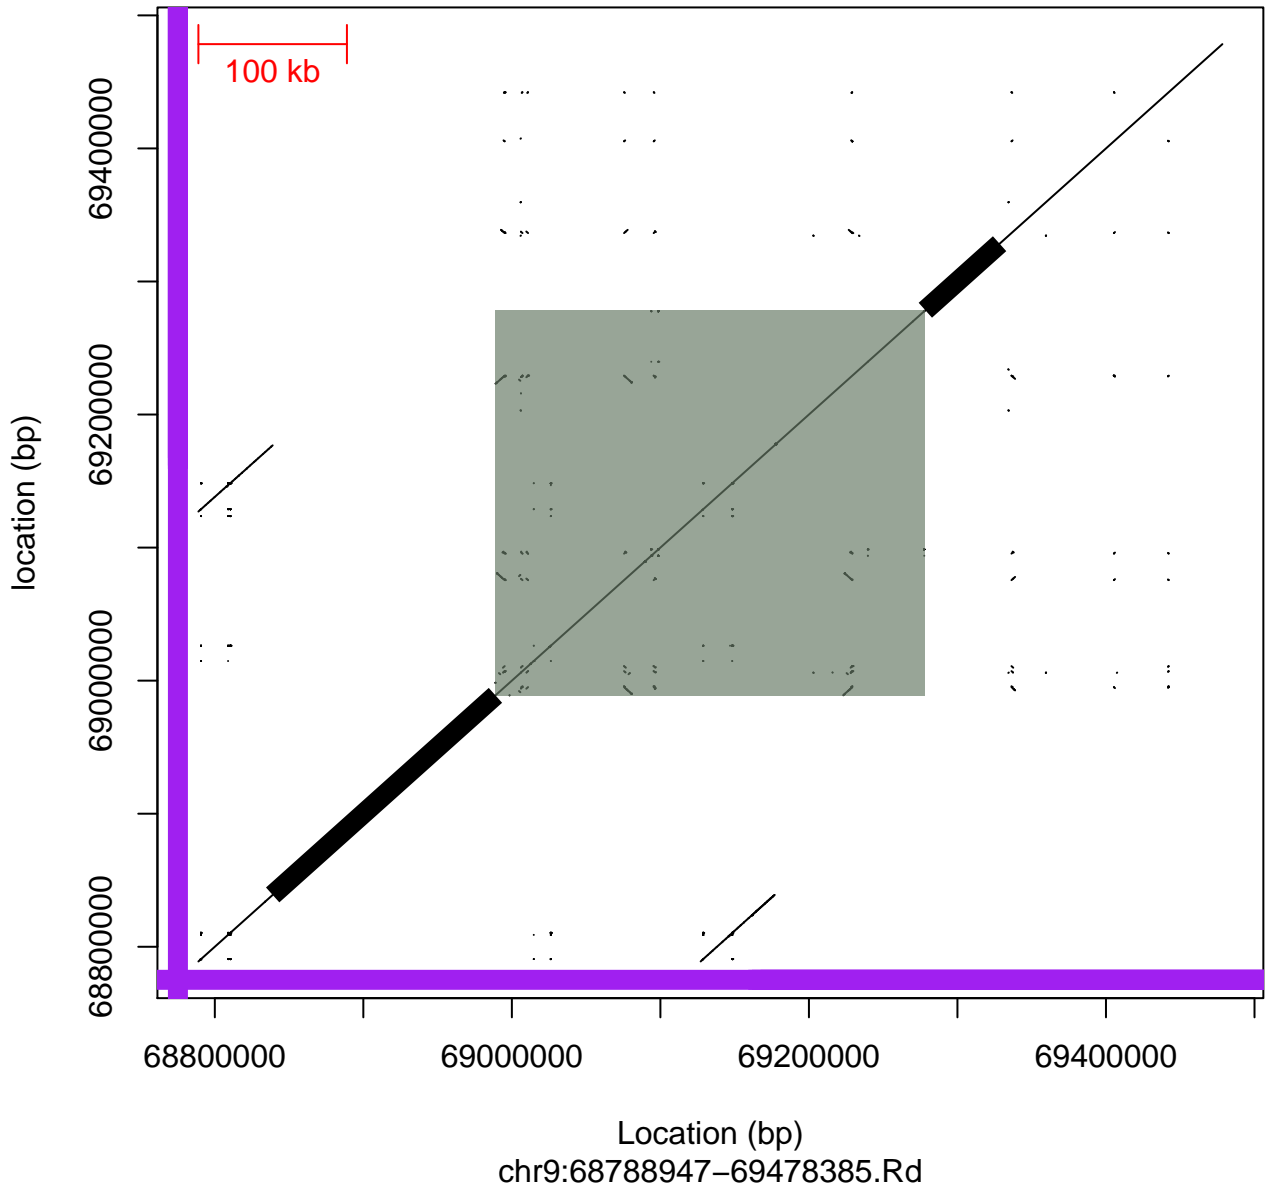

# Dotplot of mBM.9.15, fCB.9.9, ROIno.9.29 on chr9

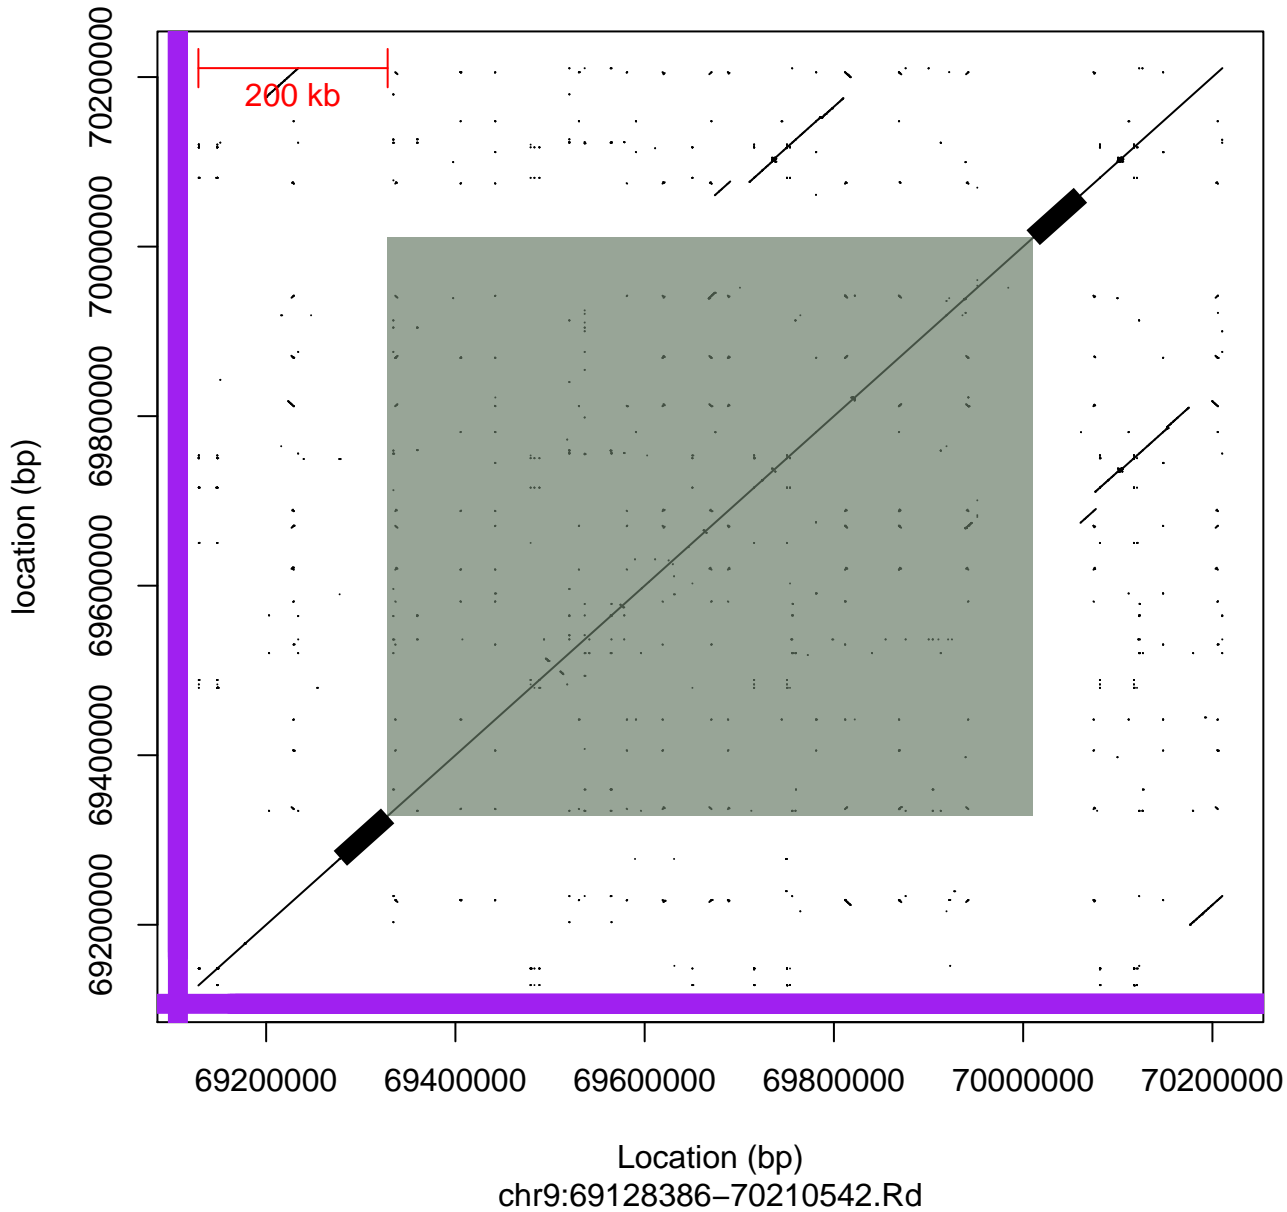

# Dotplot of mBM.9.16, fCB.9.10, ROIno.9.32 on chr9

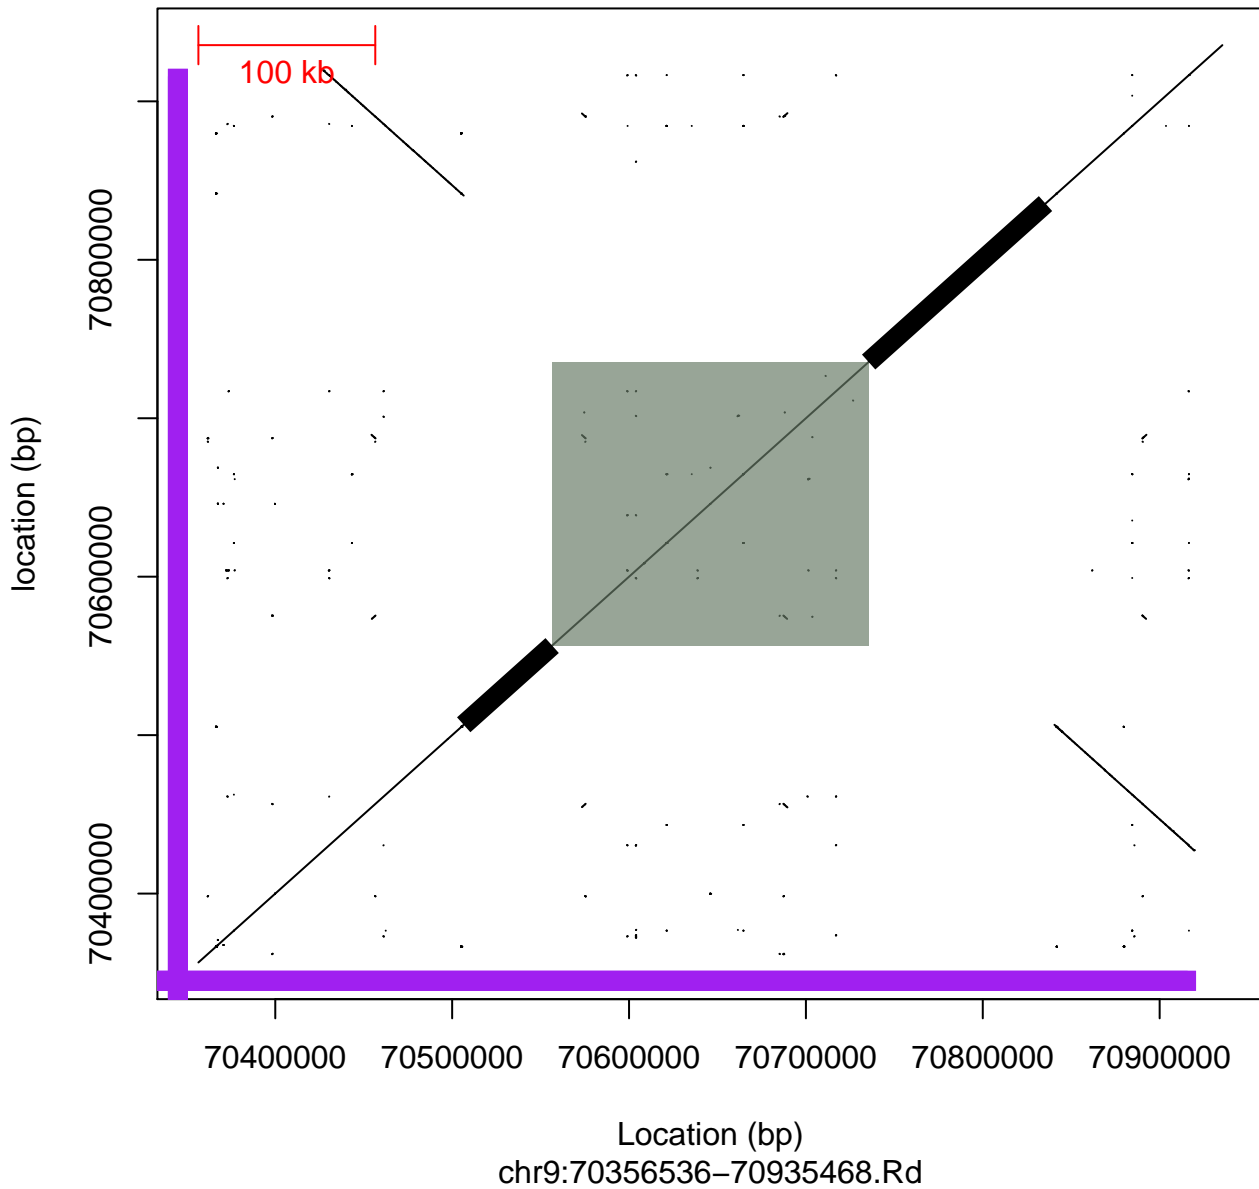

# Dotplot of mBM.10.1, mBM.10.2, fCB.10.1, fCB.10.2 on chr10

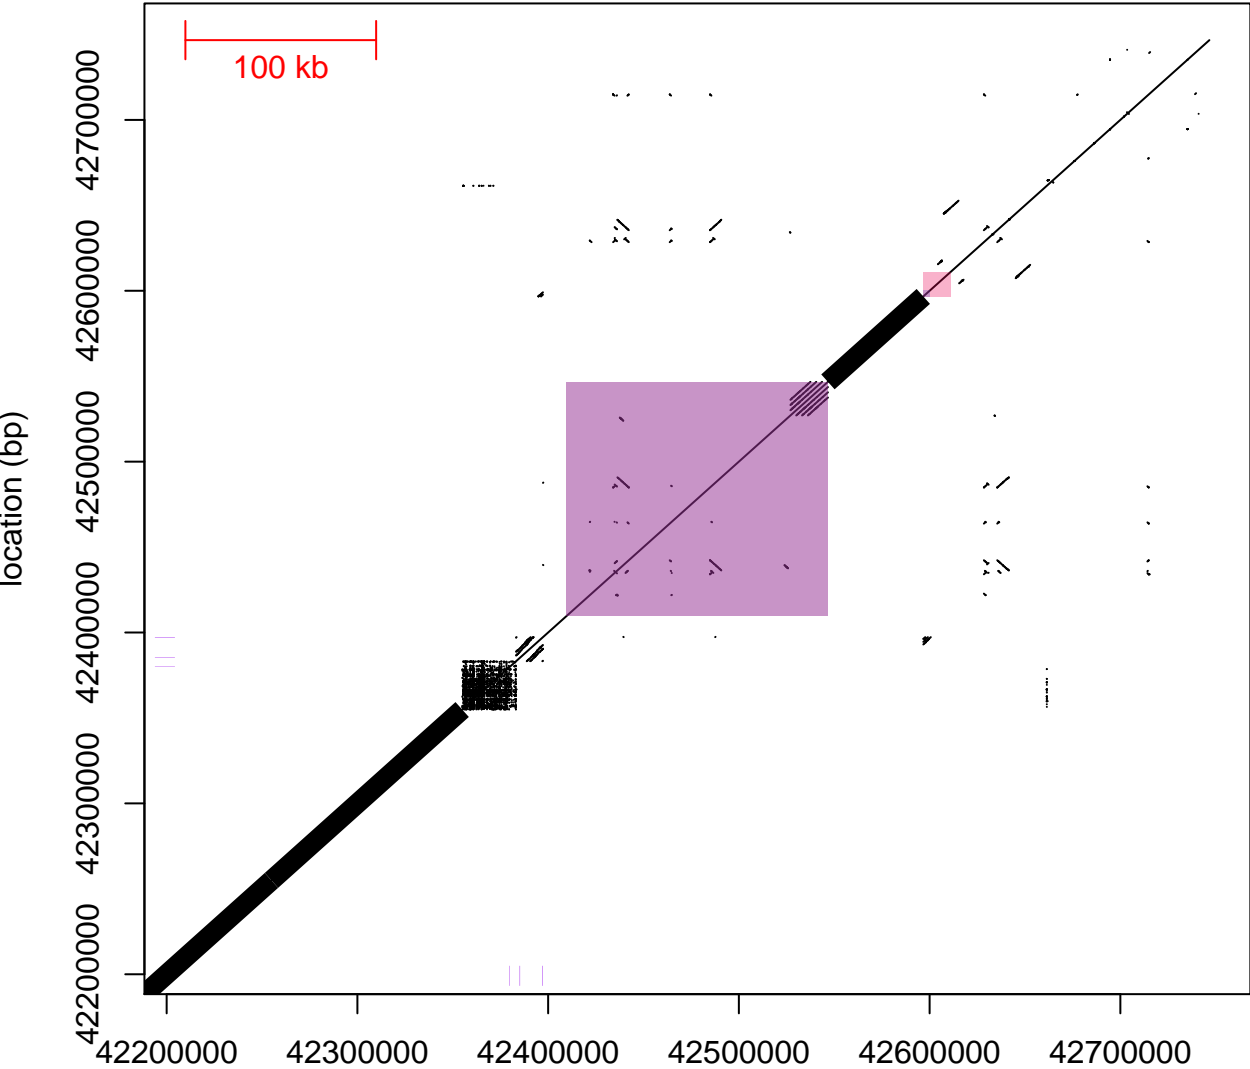

Location (bp)  
chr10:42209825–42746687.Rd

# Dotplot of mBM.10.1, mBM.10.2, fCB.10.1, fCB.10.2 on chr10

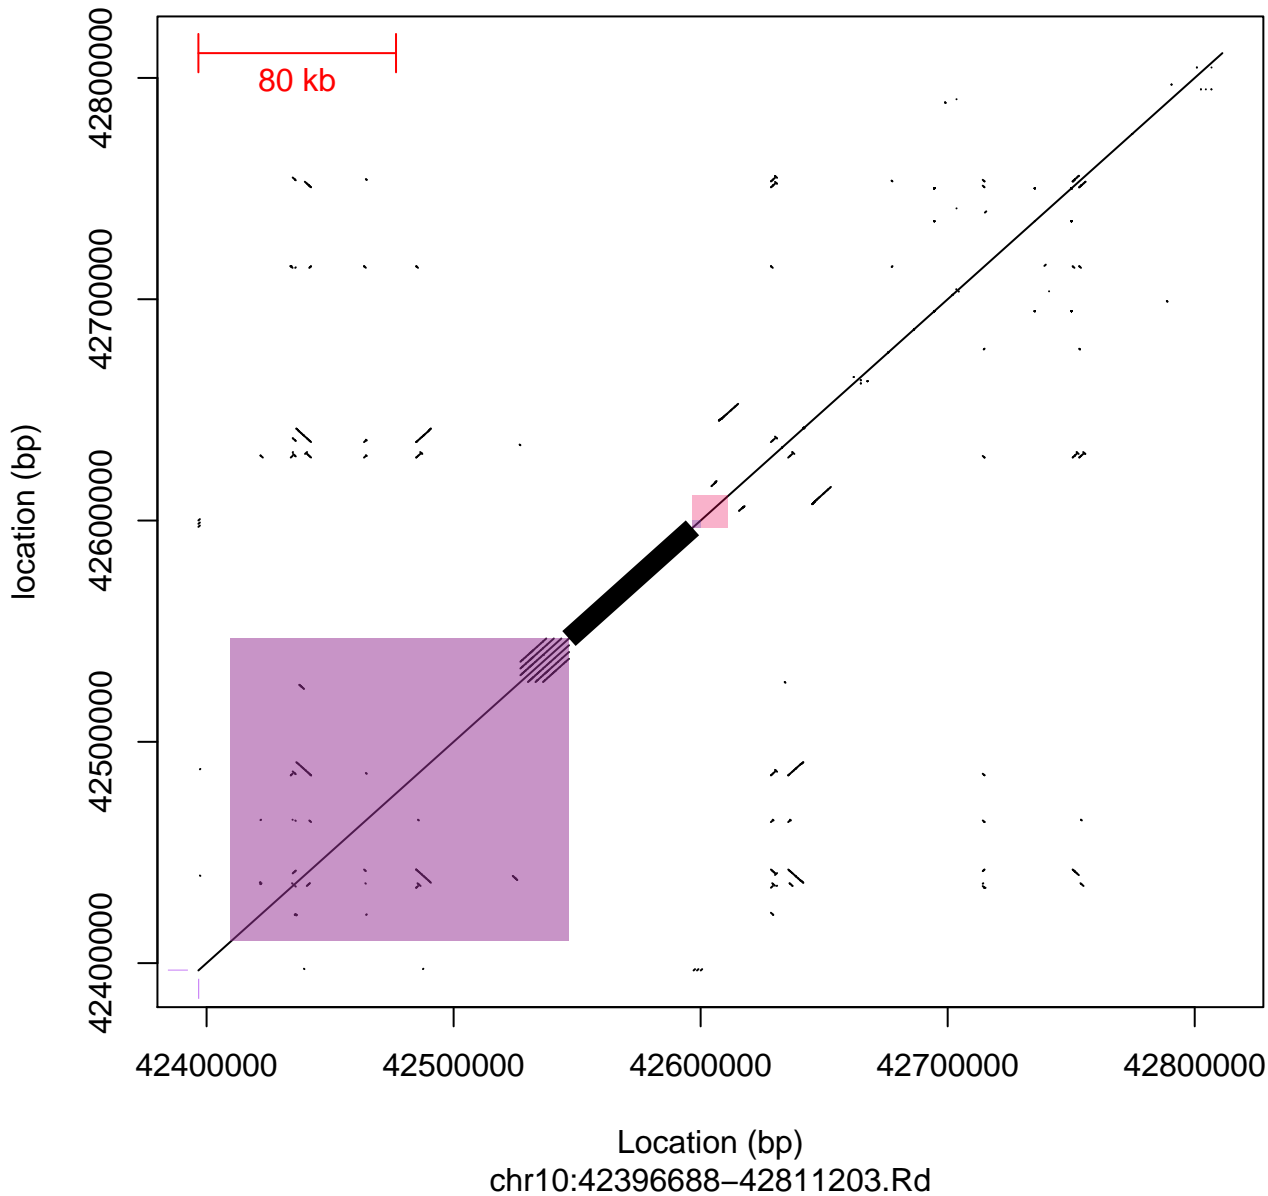

# Dotplot of fCB.10.3, ROIno.10.8 on chr10

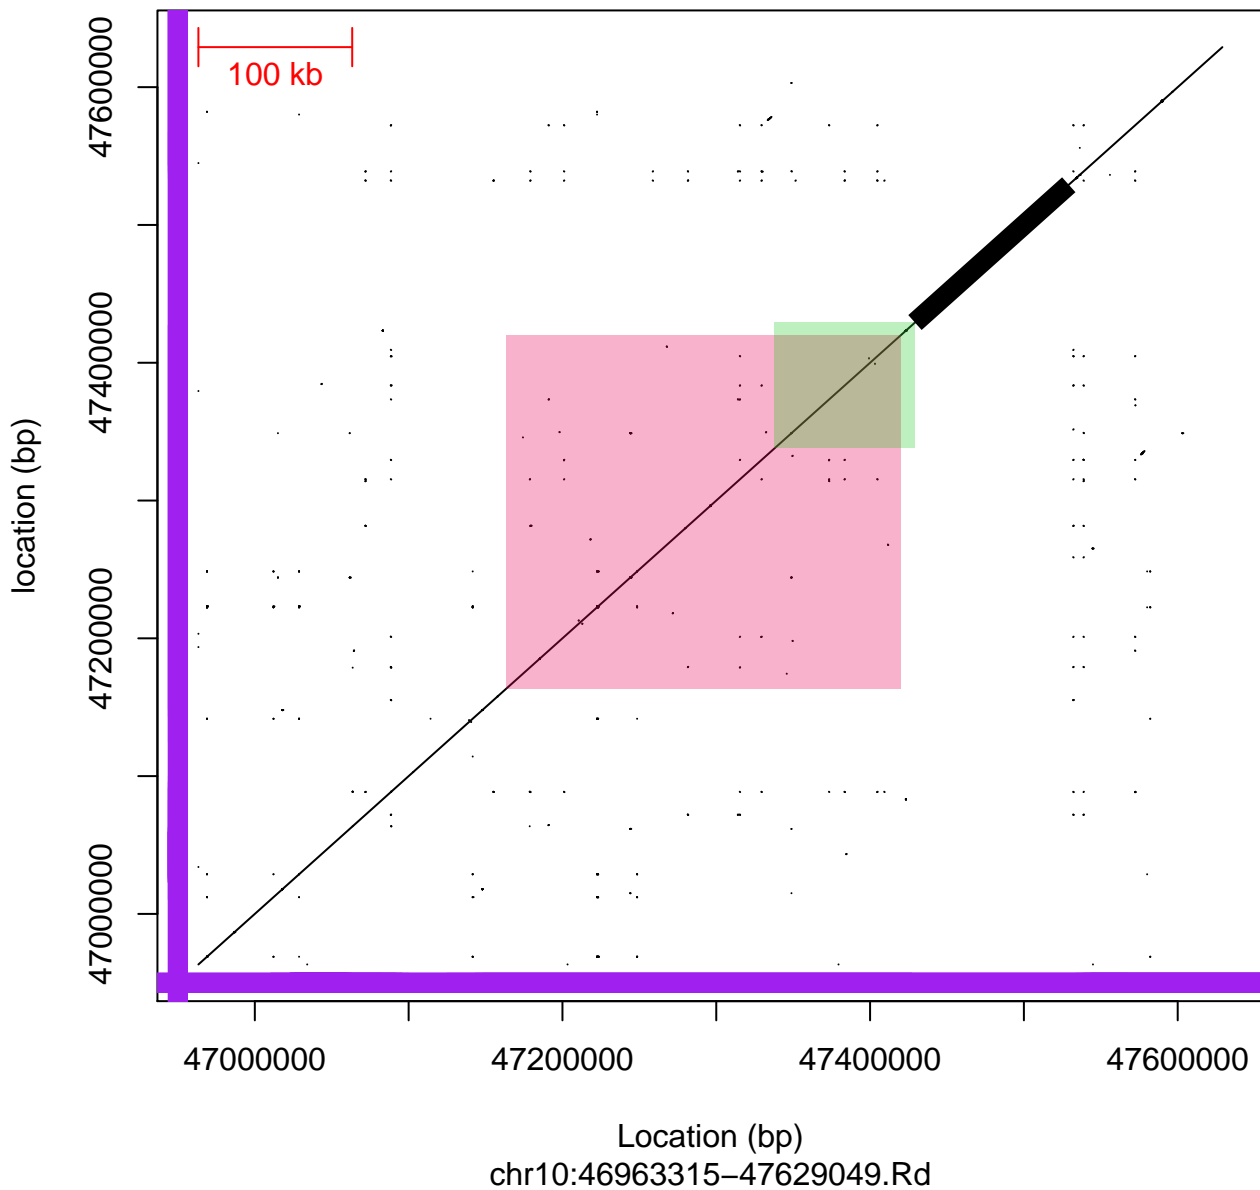



# Dotplot of mBM.10.3, fCB.10.4 on chr10

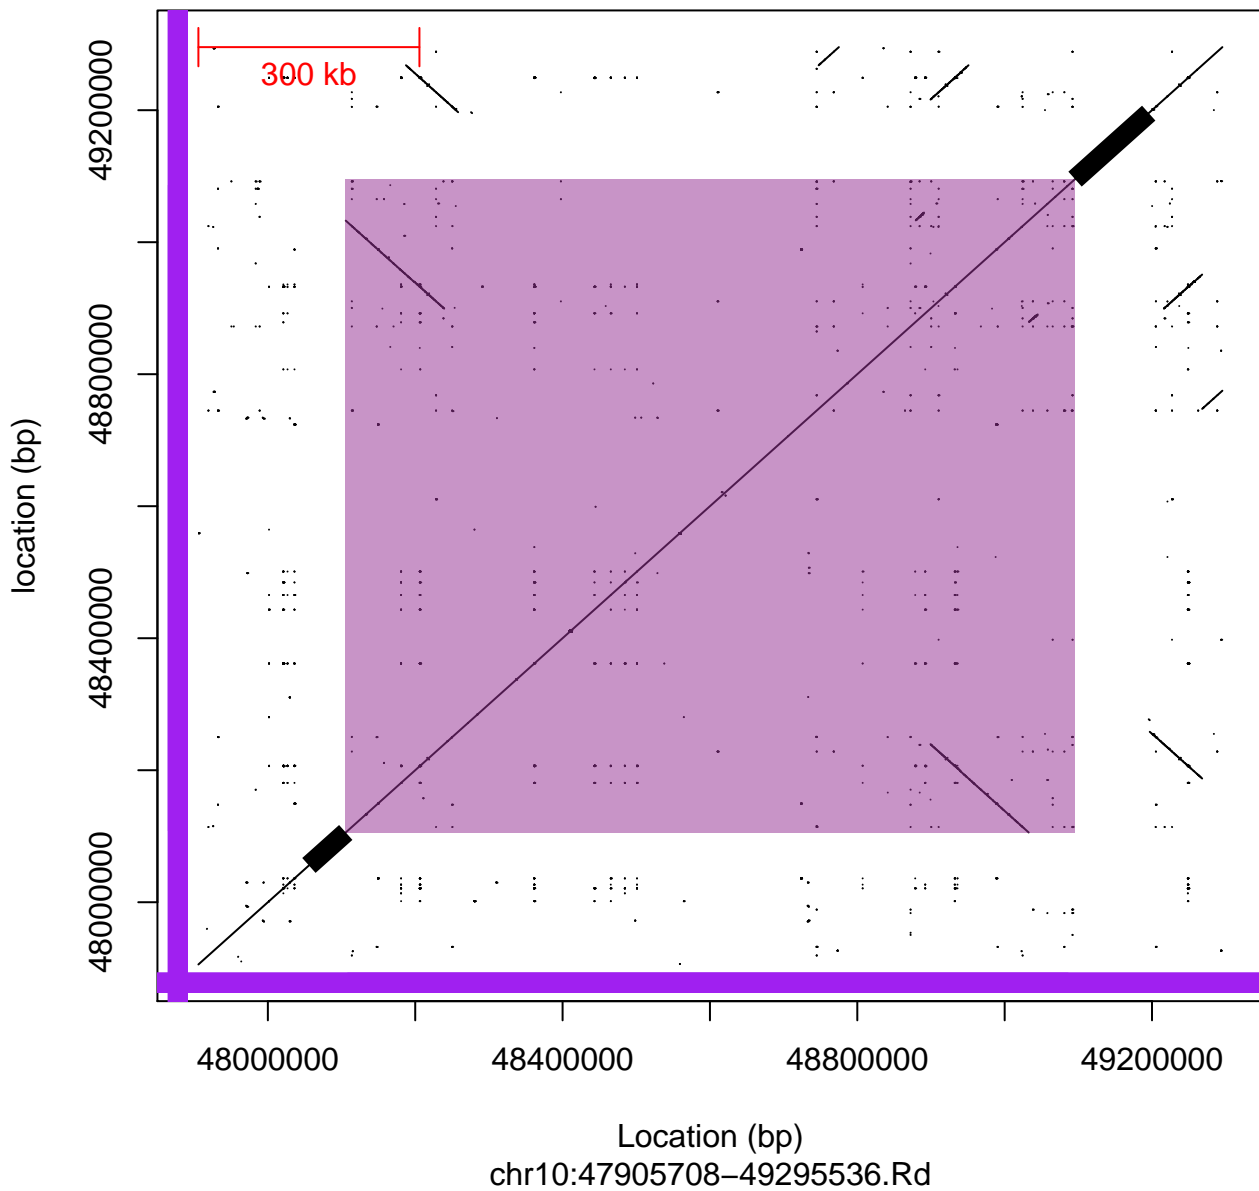

# Dotplot of mBM.10.4, fCB.10.5 on chr10

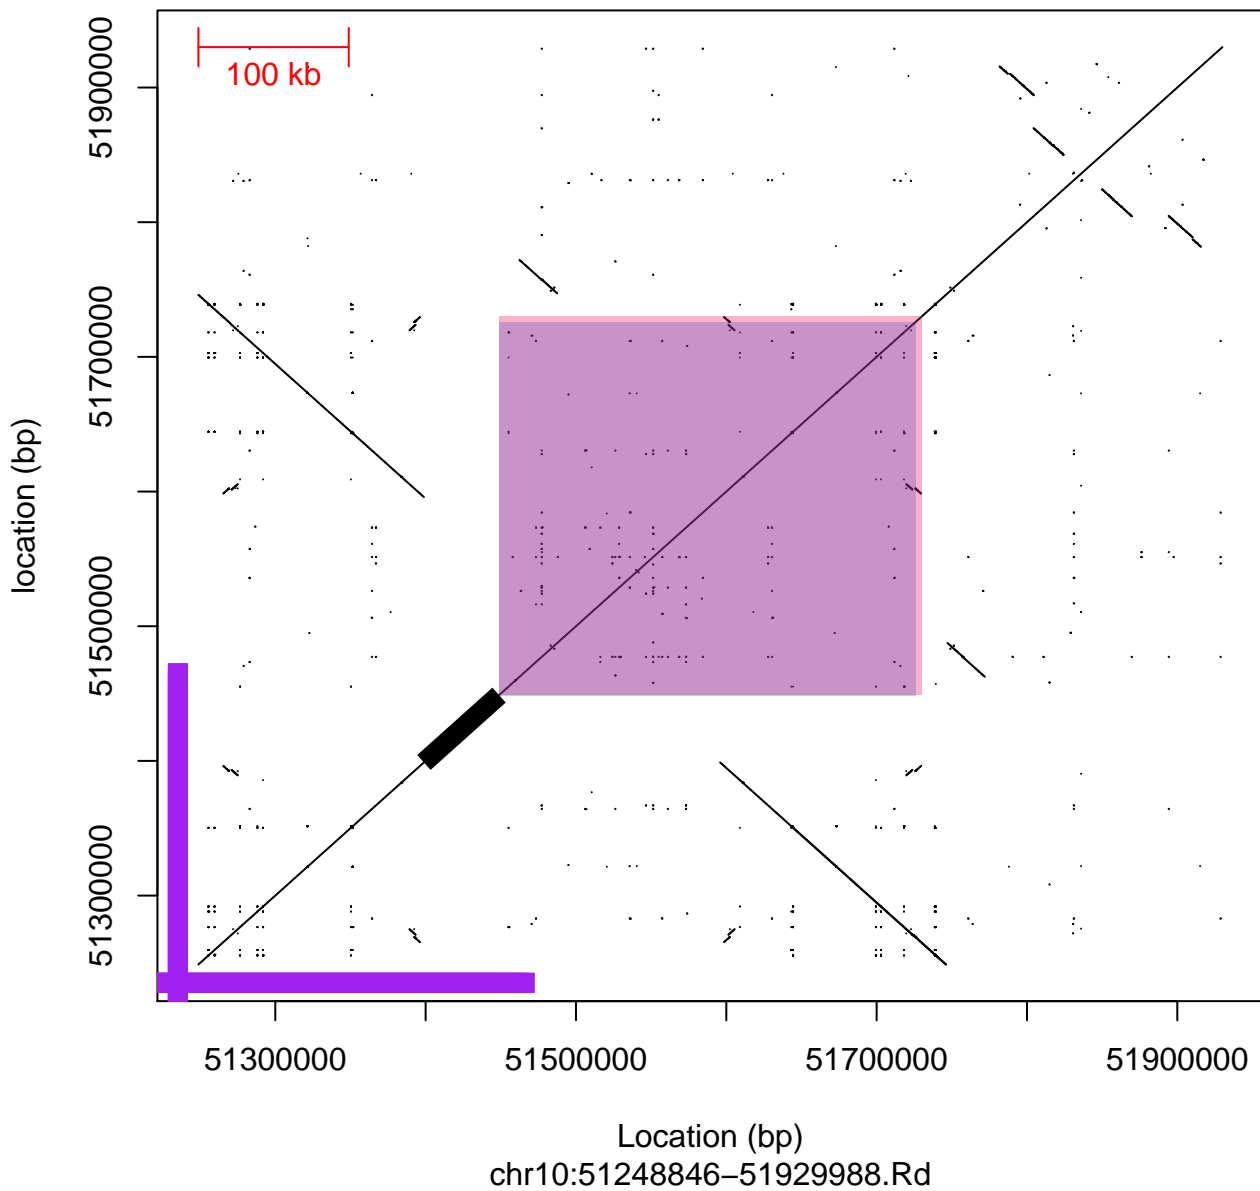

# Dotplot of ROIno.10.11 on chr10

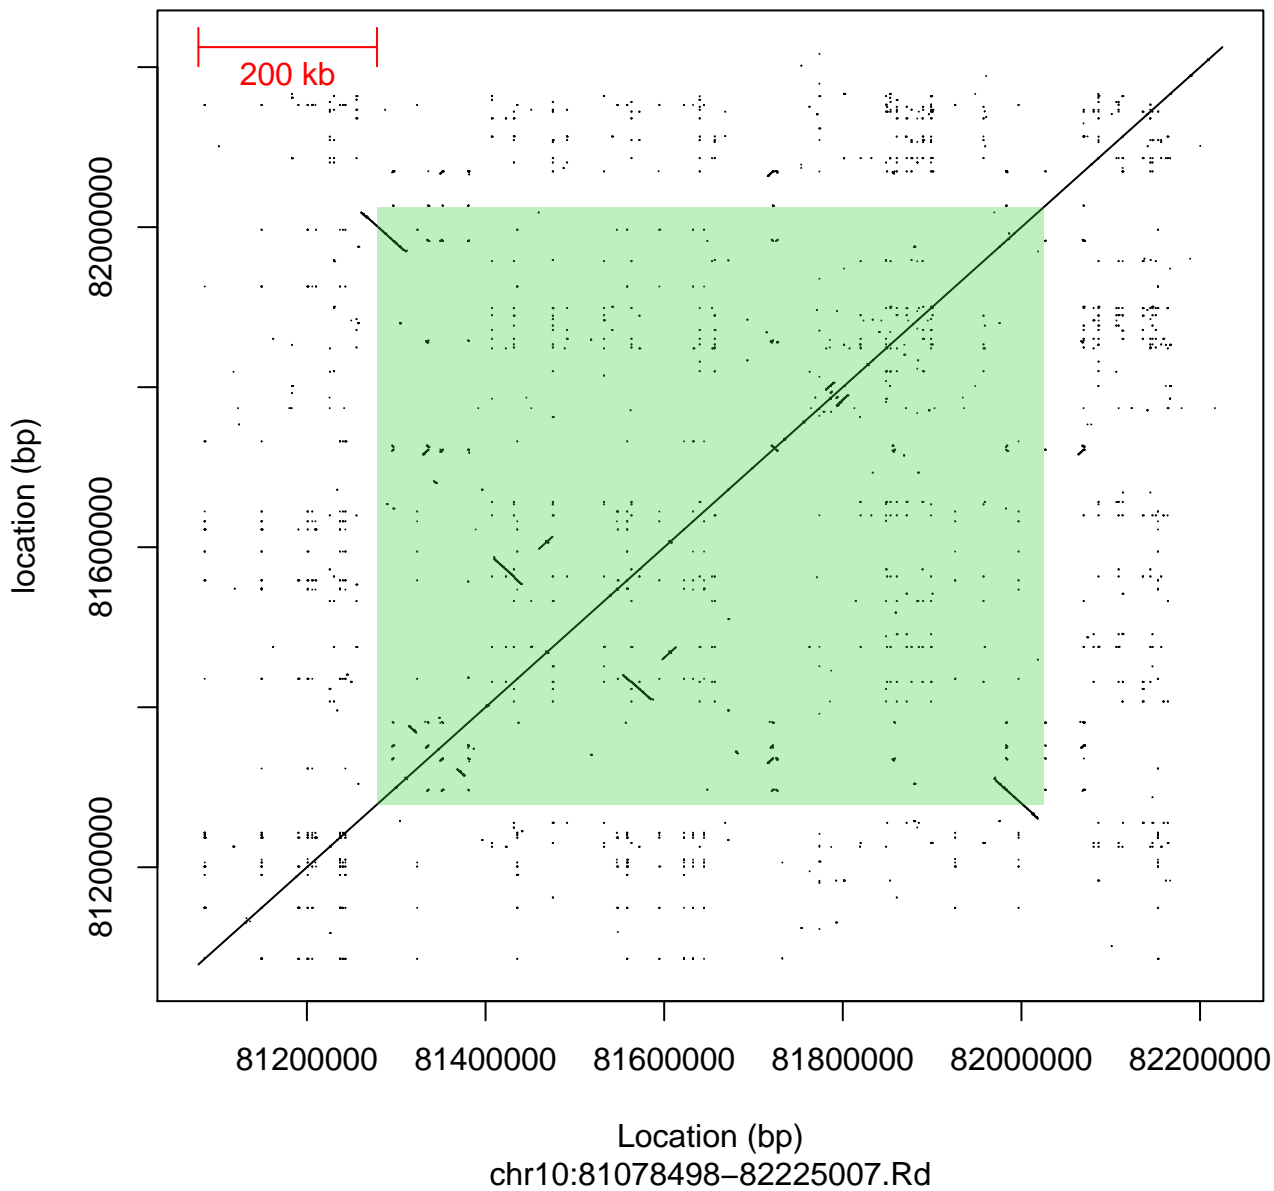

# Dotplot of mBM.11.1 on chr11

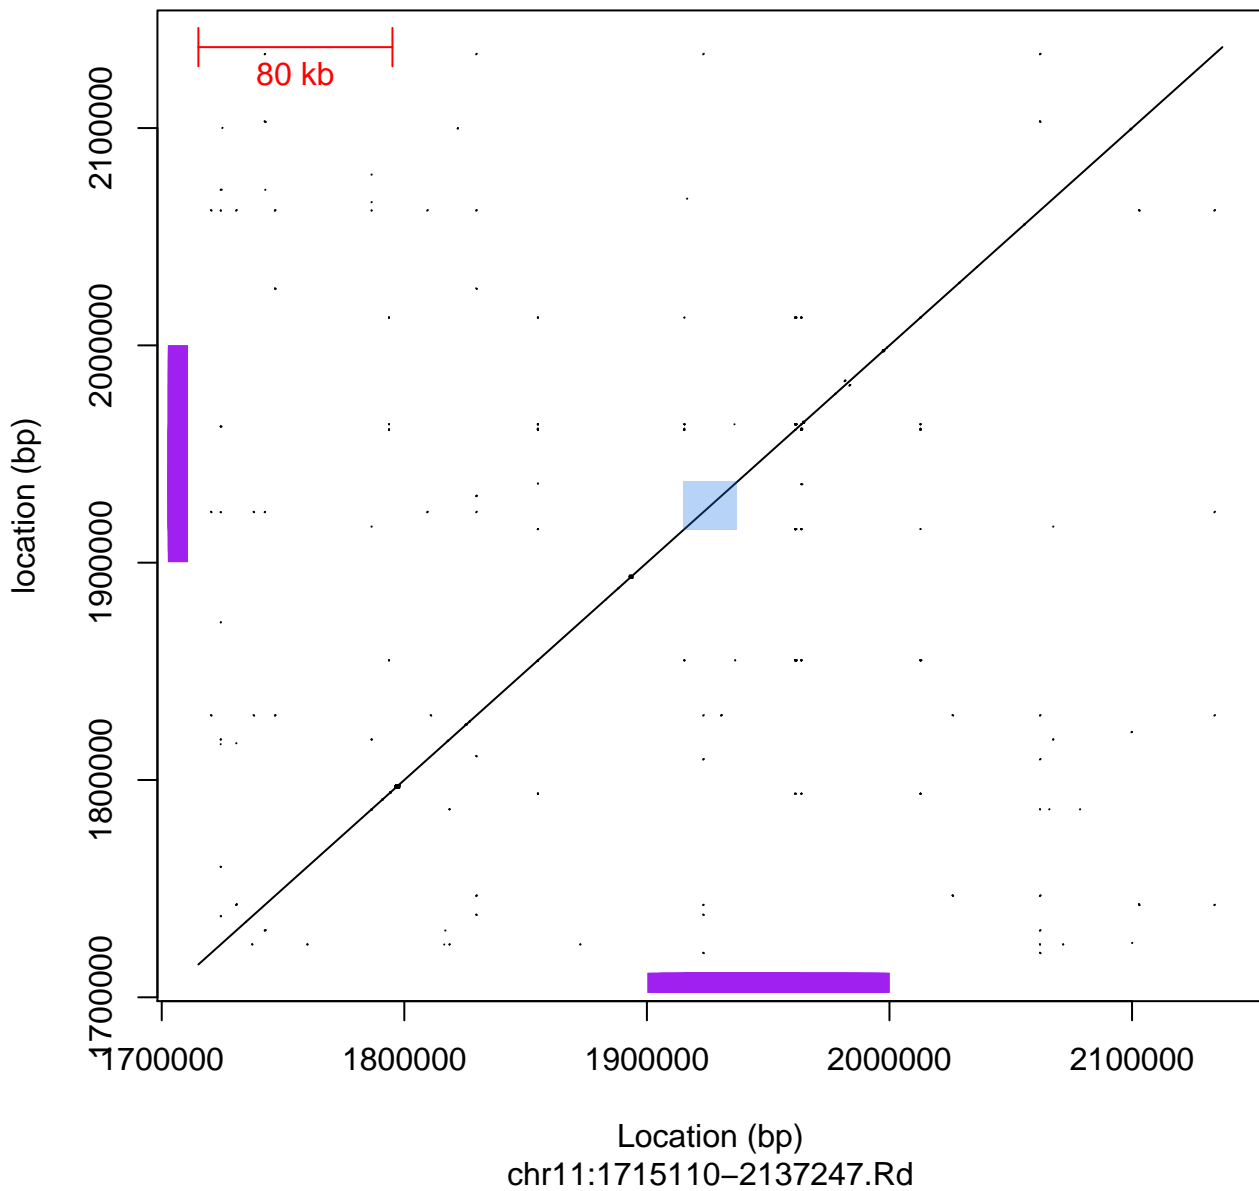

# Dotplot of ROI No.11.3 on chr11

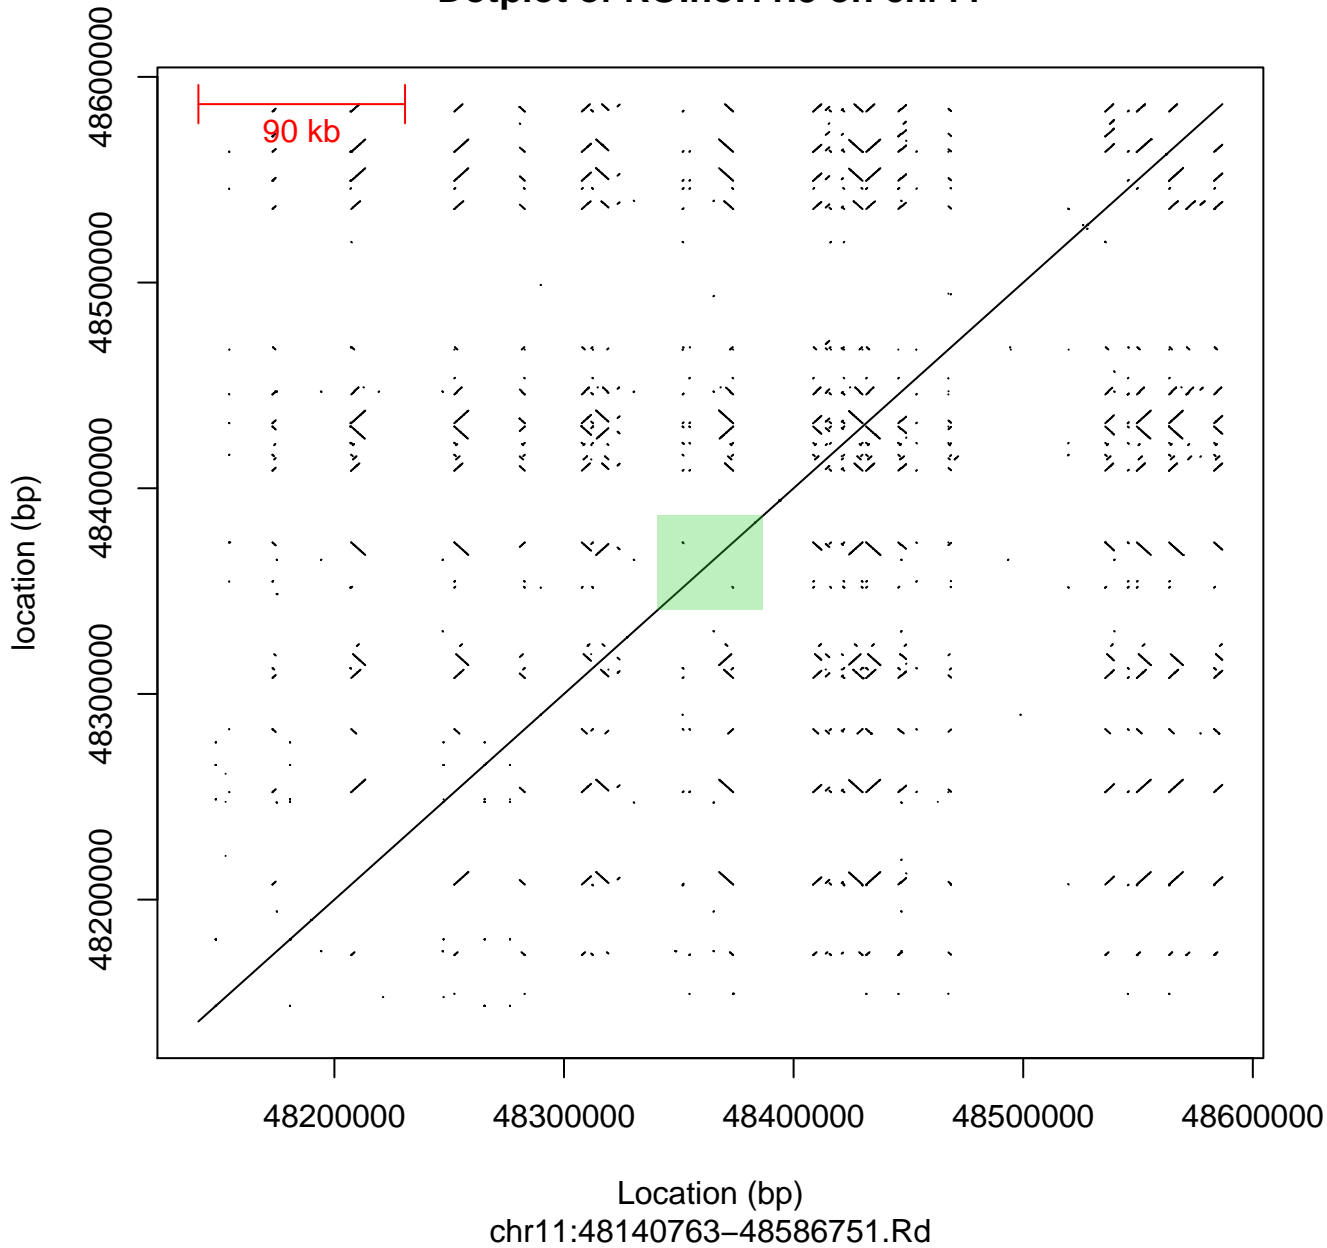

# Dotplot of mBM.11.2, fCB.11.1, ROIno.11.5 on chr11

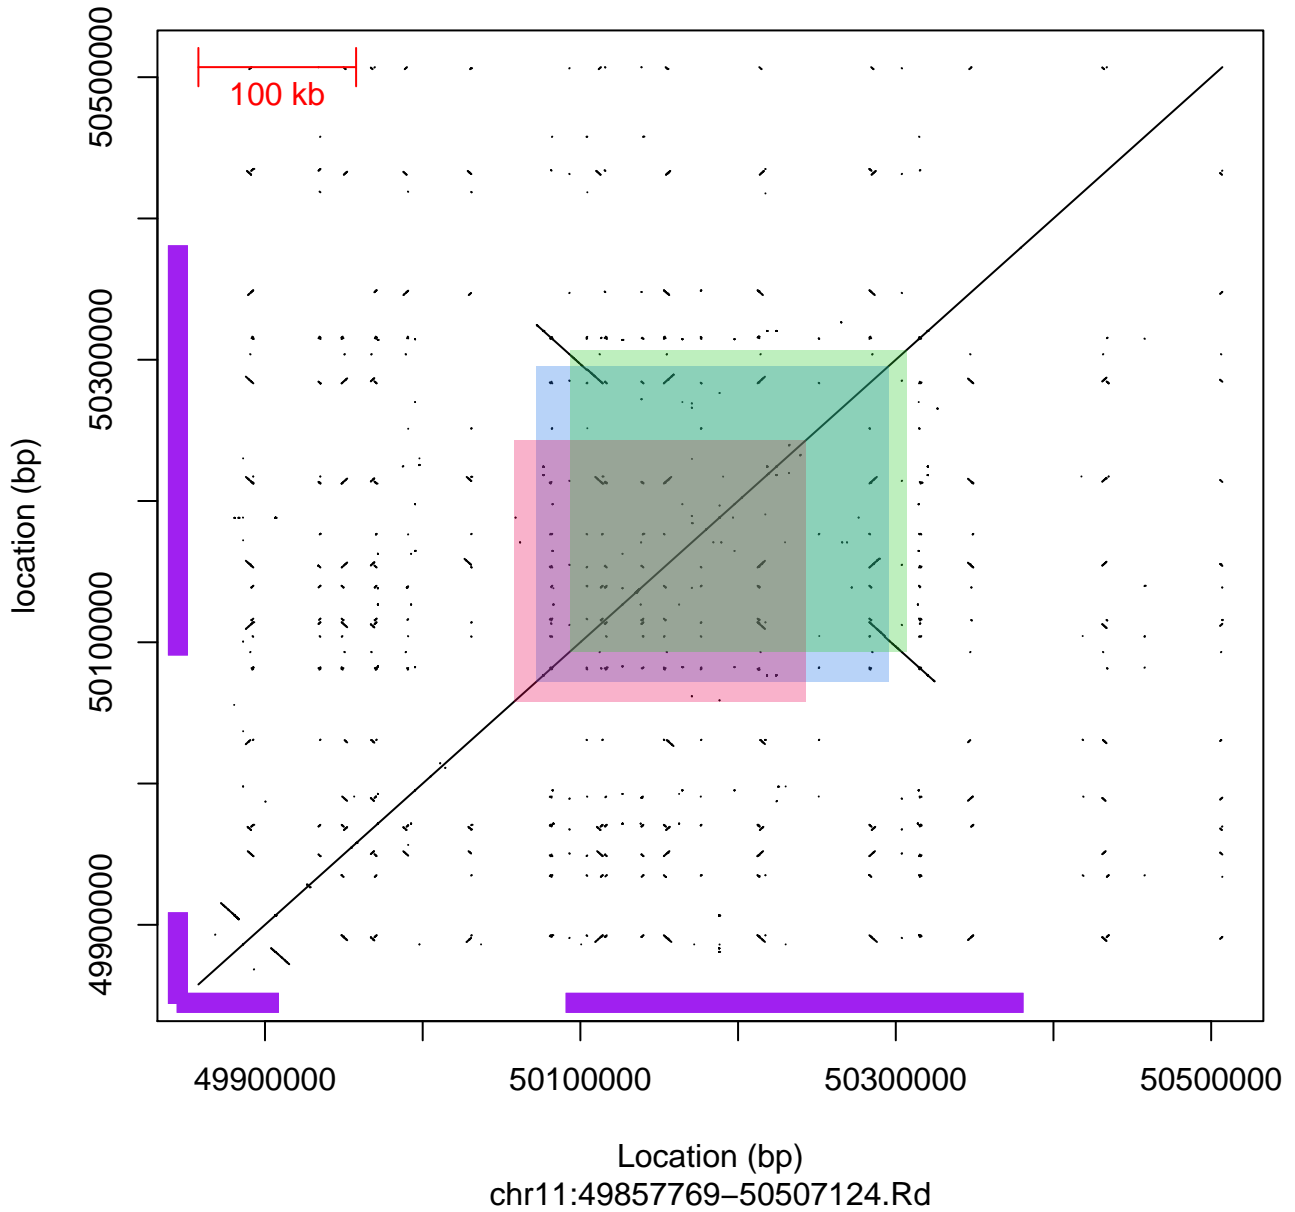

# Dotplot of mBM.11.3, fCB.11.2 on chr11

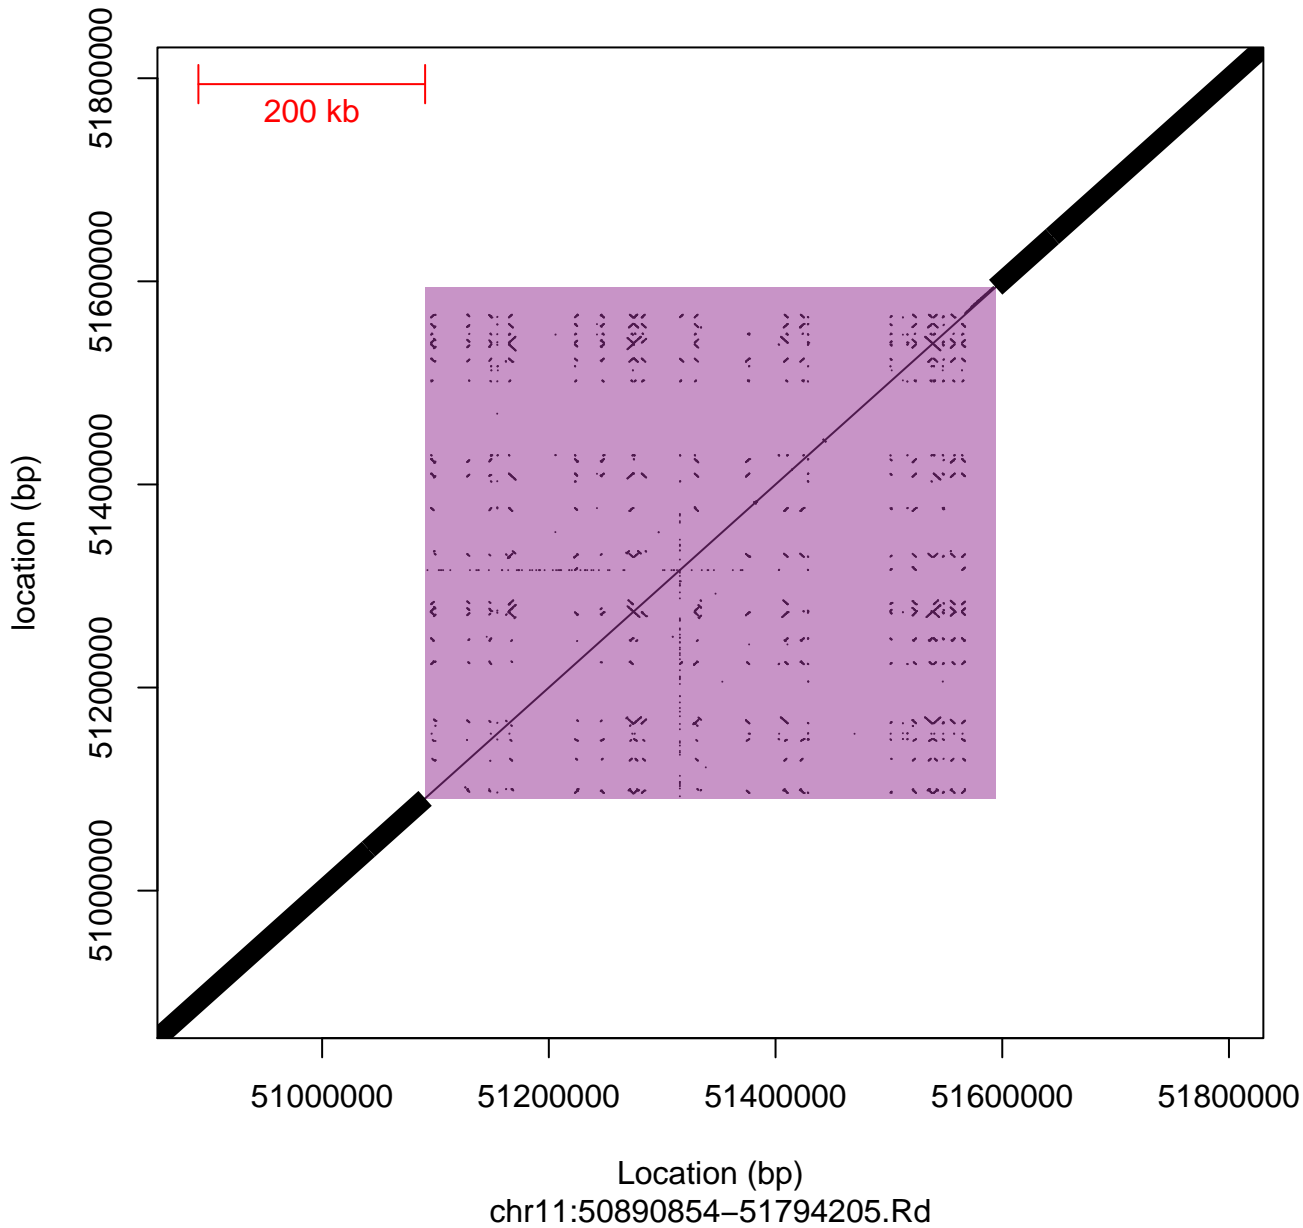

# Dotplot of ROI No.11.7 on chr11

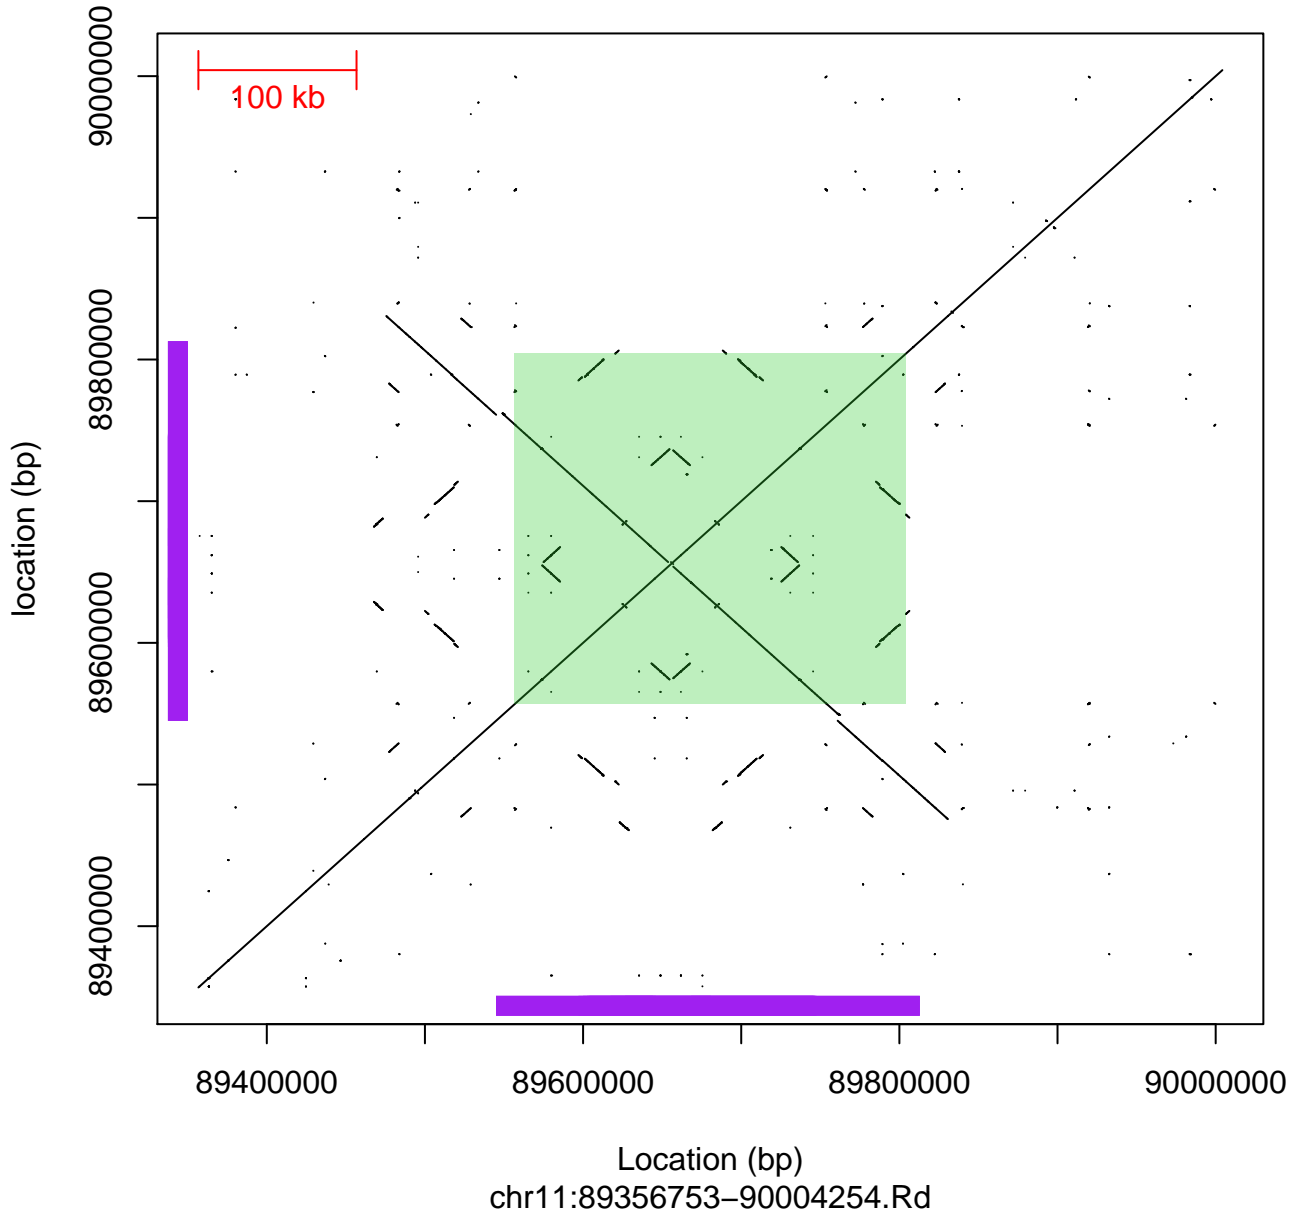



Dotplot of mBM.12.1, fCB.12.1, ROIno.12.1 on chr12

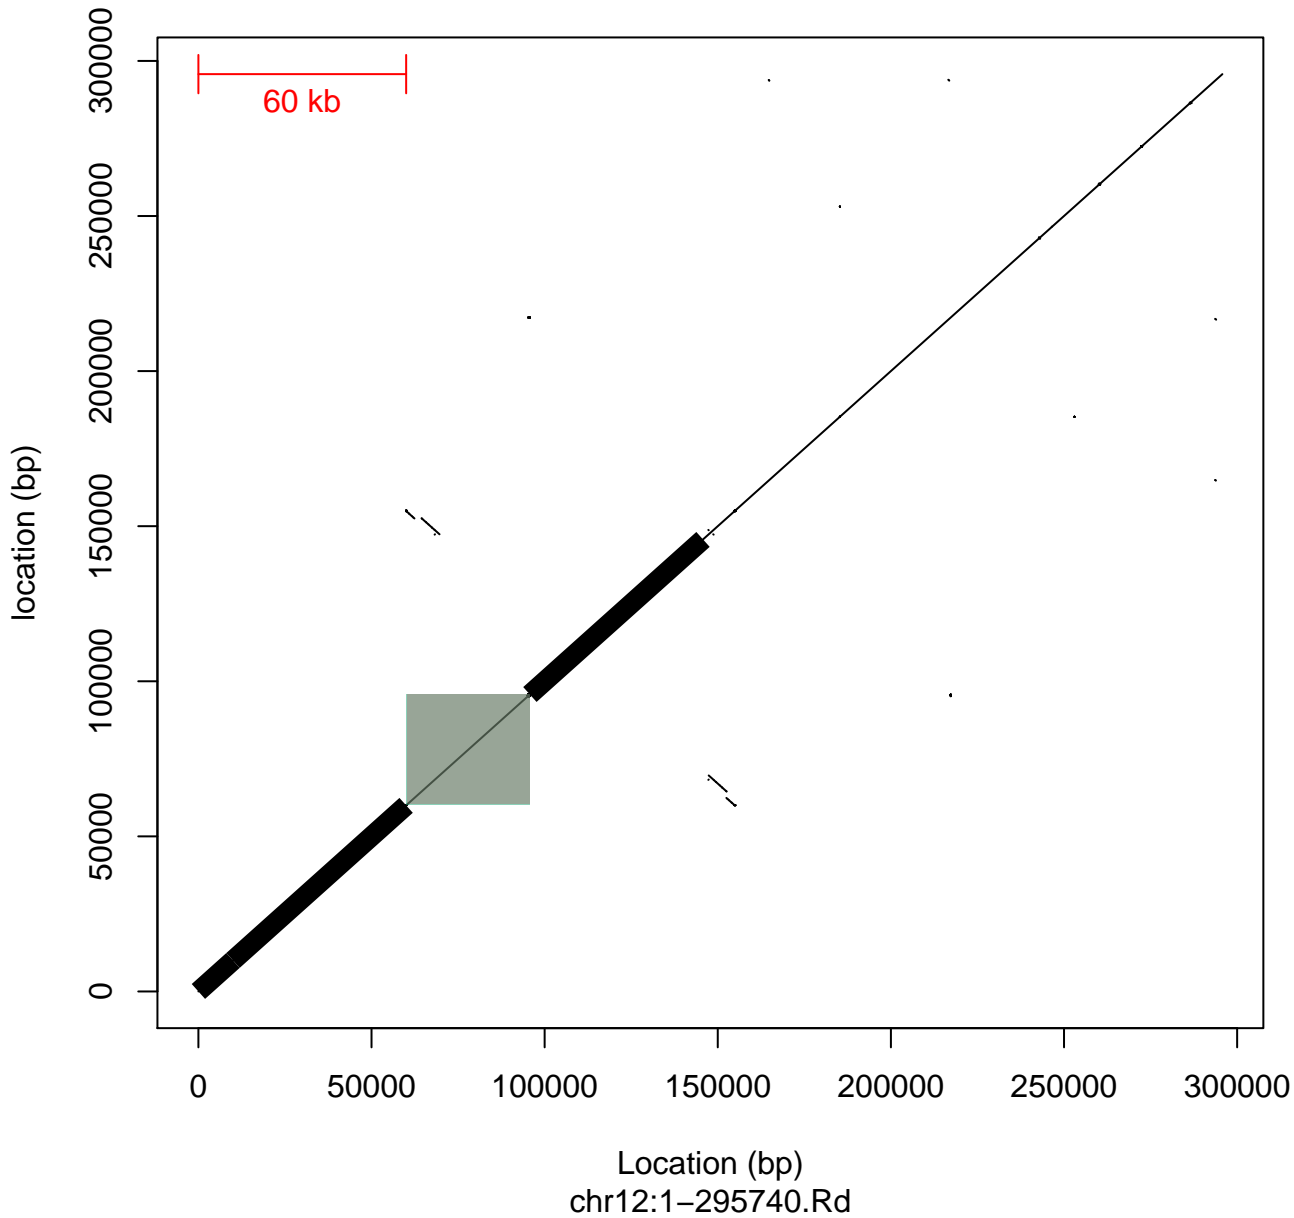

# Dotplot of mBM.12.2 on chr12

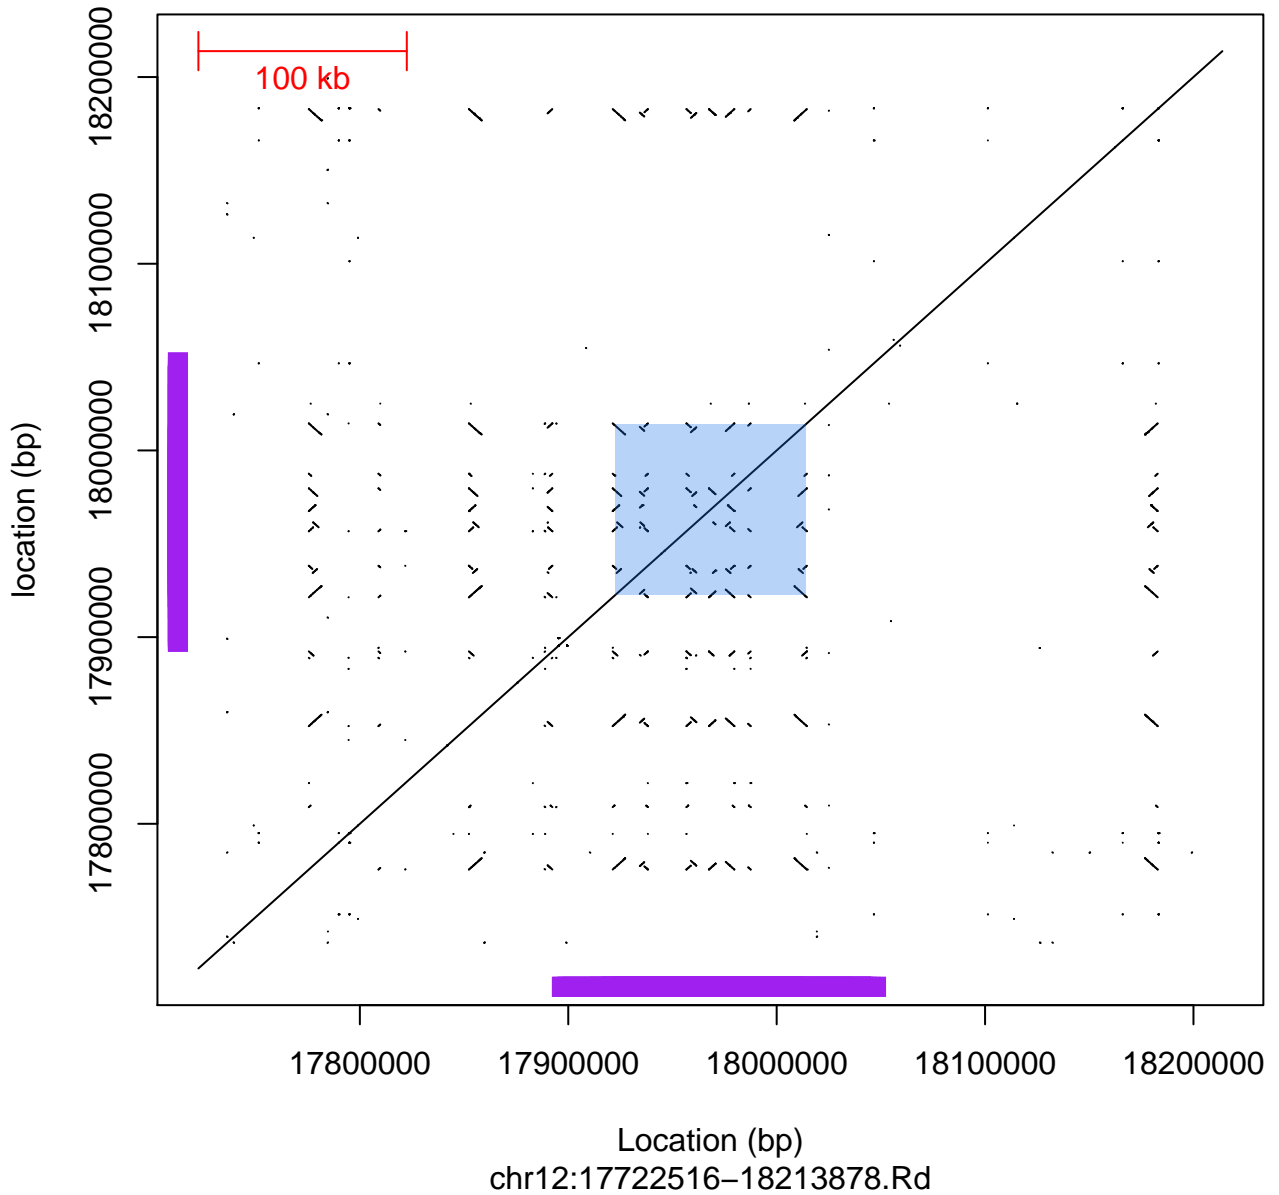

# Dotplot of ROI No.12.5 on chr12

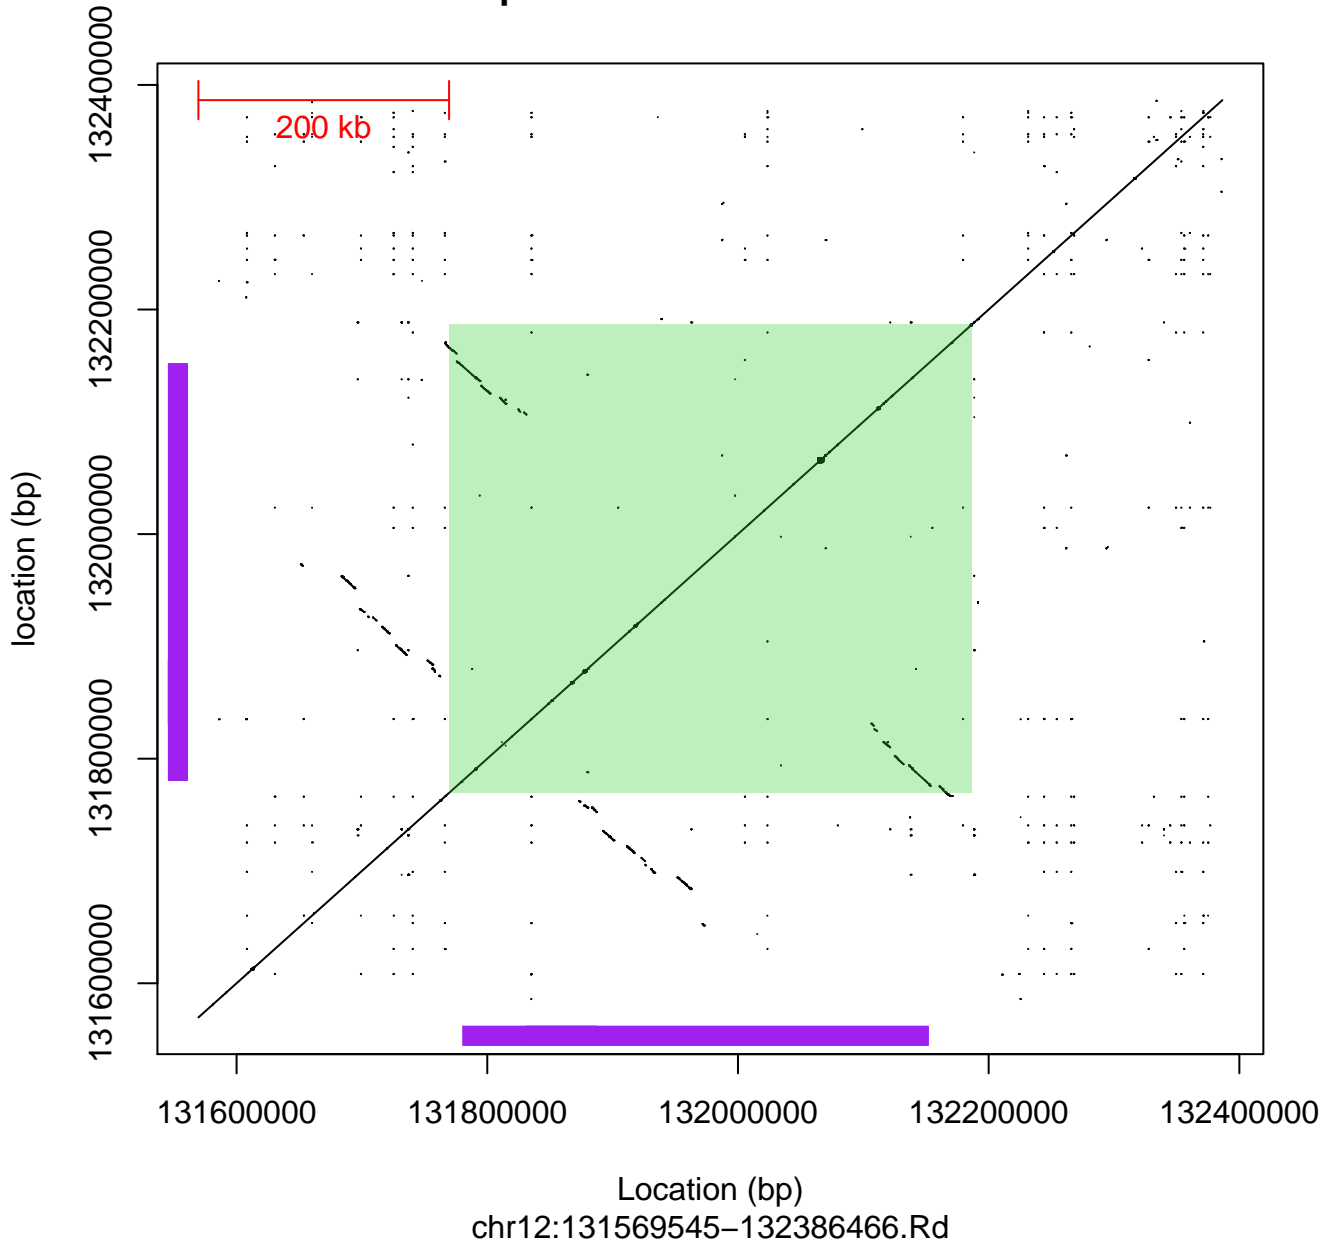

# Dotplot of mBM.14.1, ROIno.14.1 on chr14

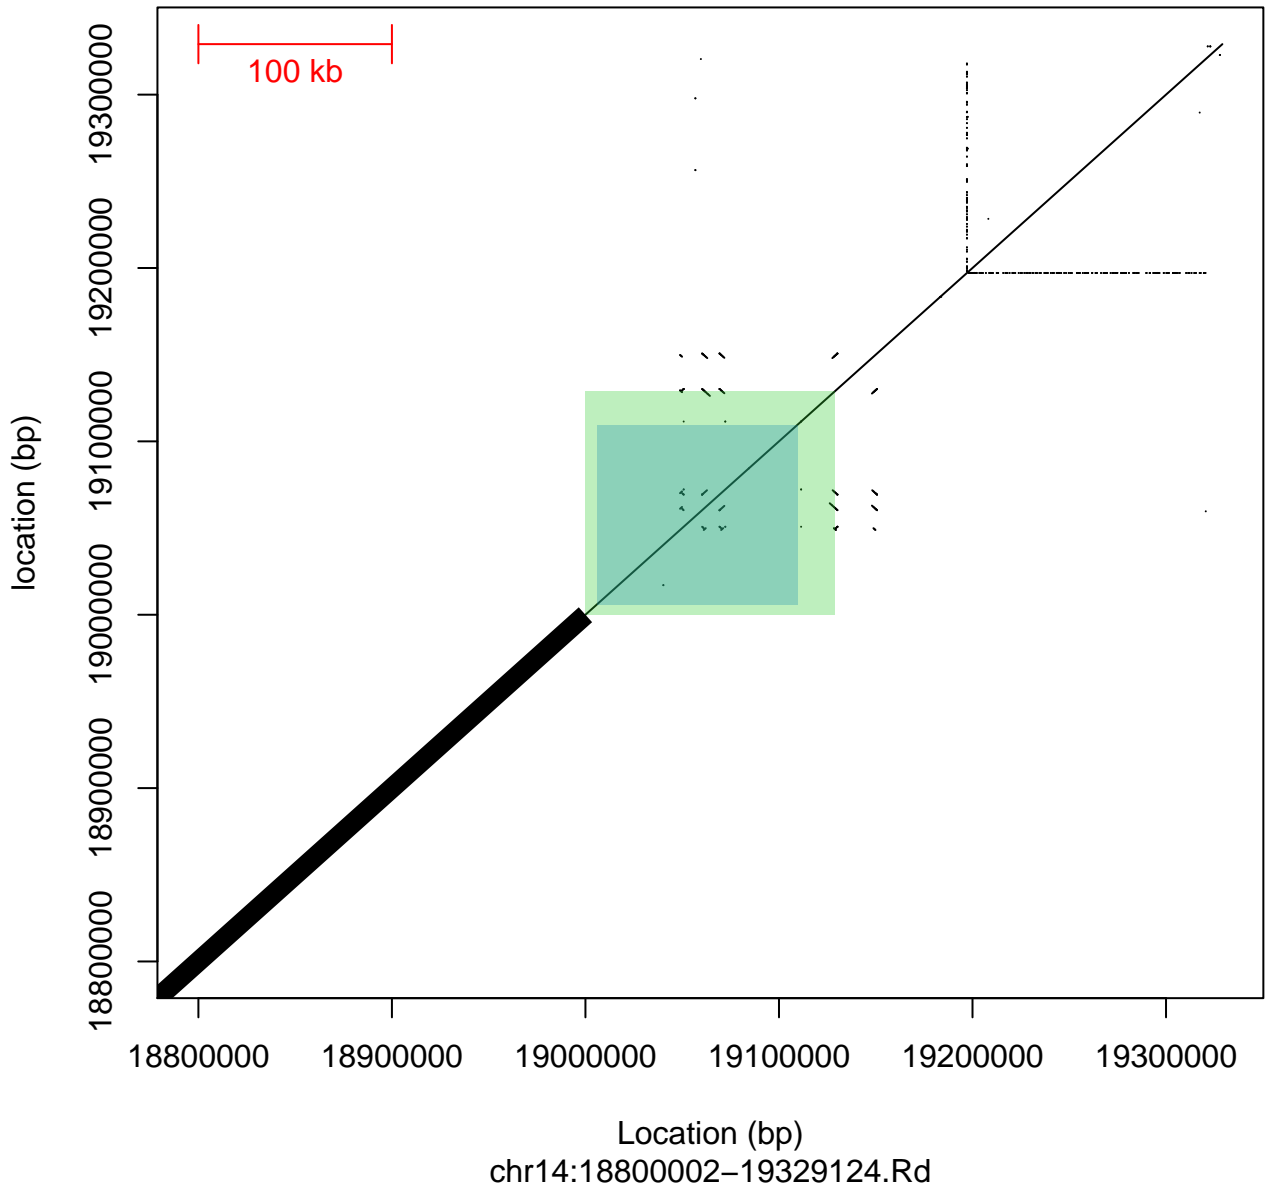

# Dotplot of mBM.14.2, fCB.14.1, ROIno.14.3, ROIno.14.4 on chr14

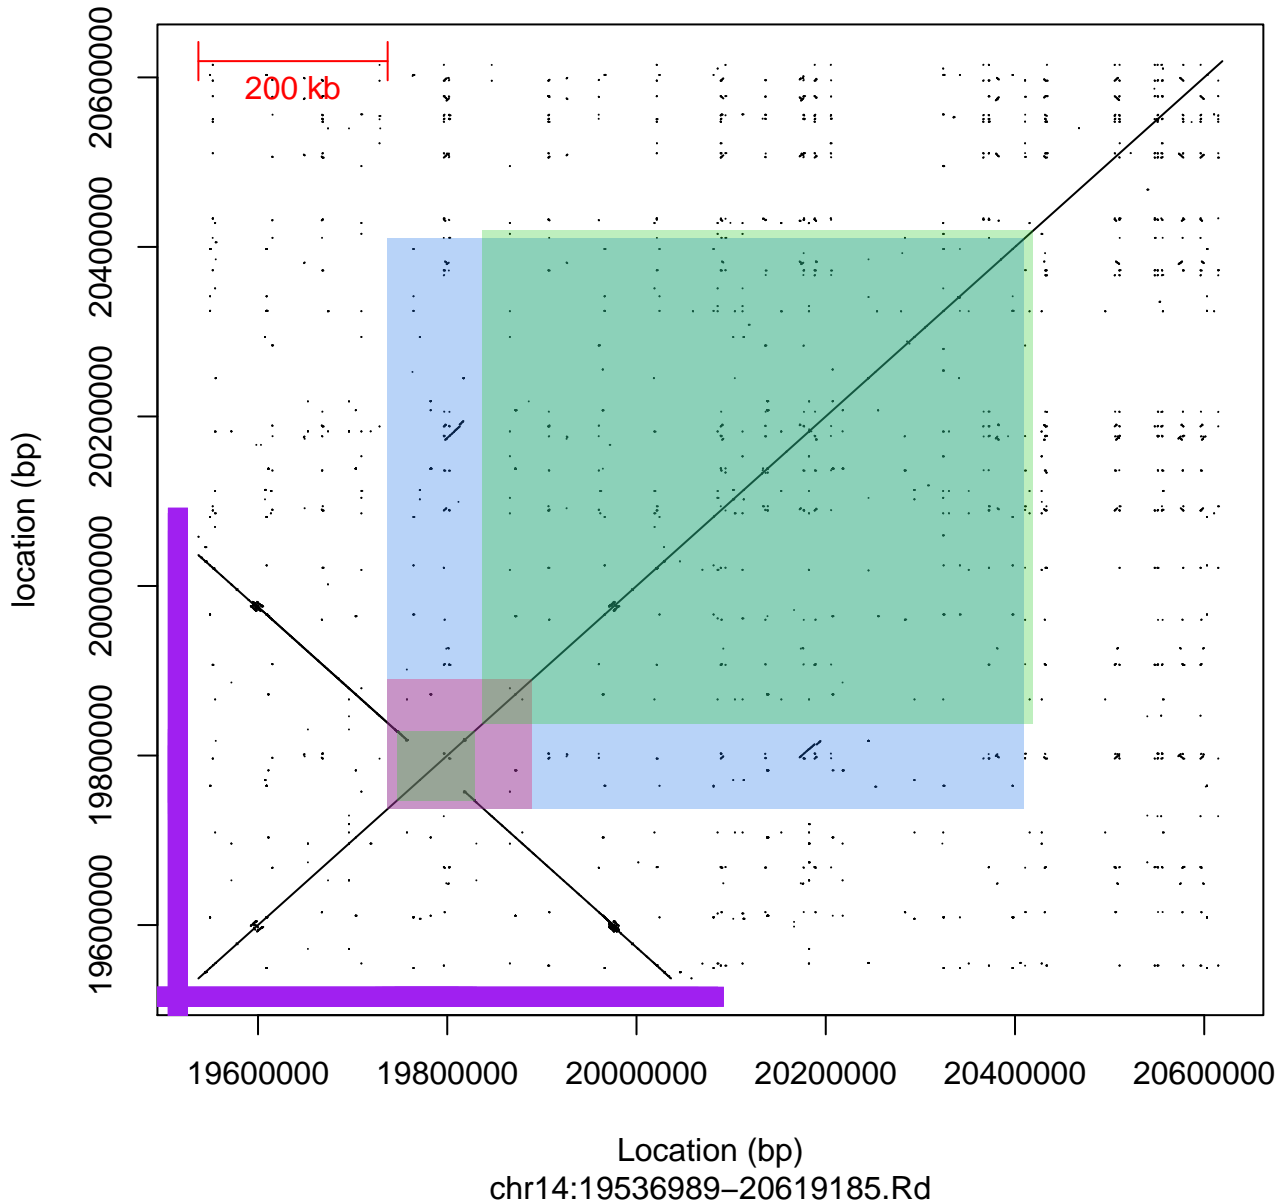

# Dotplot of fCB.15.1, ROIno.15.1 on chr15

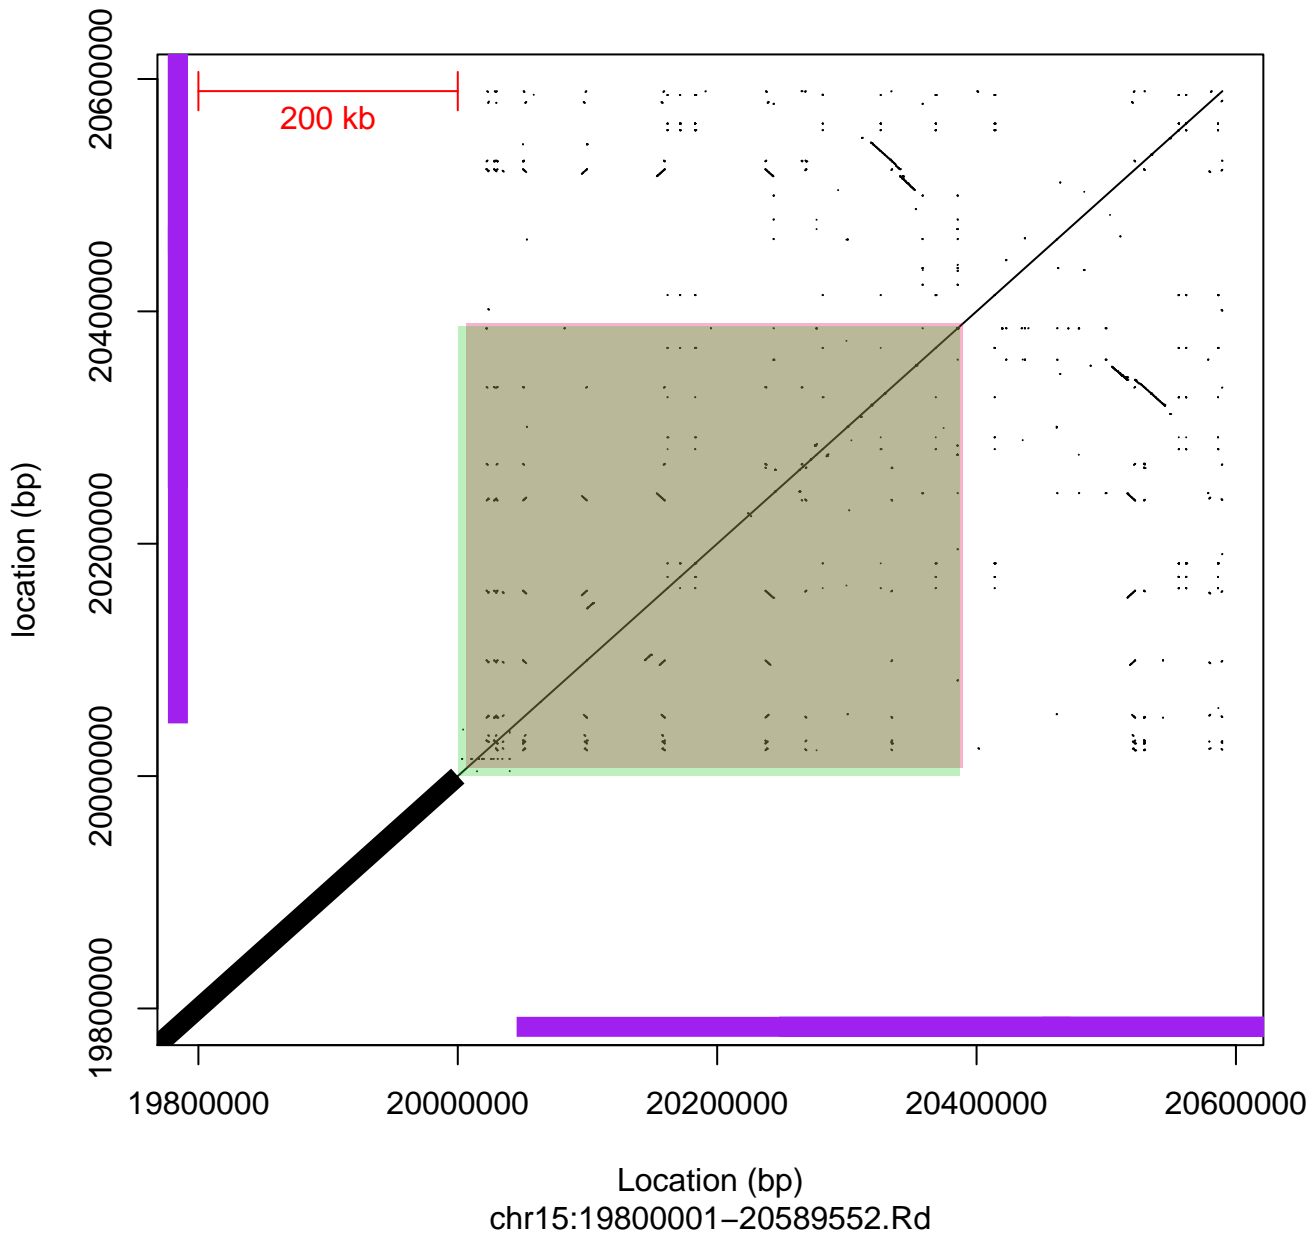

# Dotplot of mBM.15.1, fCB.15.2, ROIno.15.5 on chr15

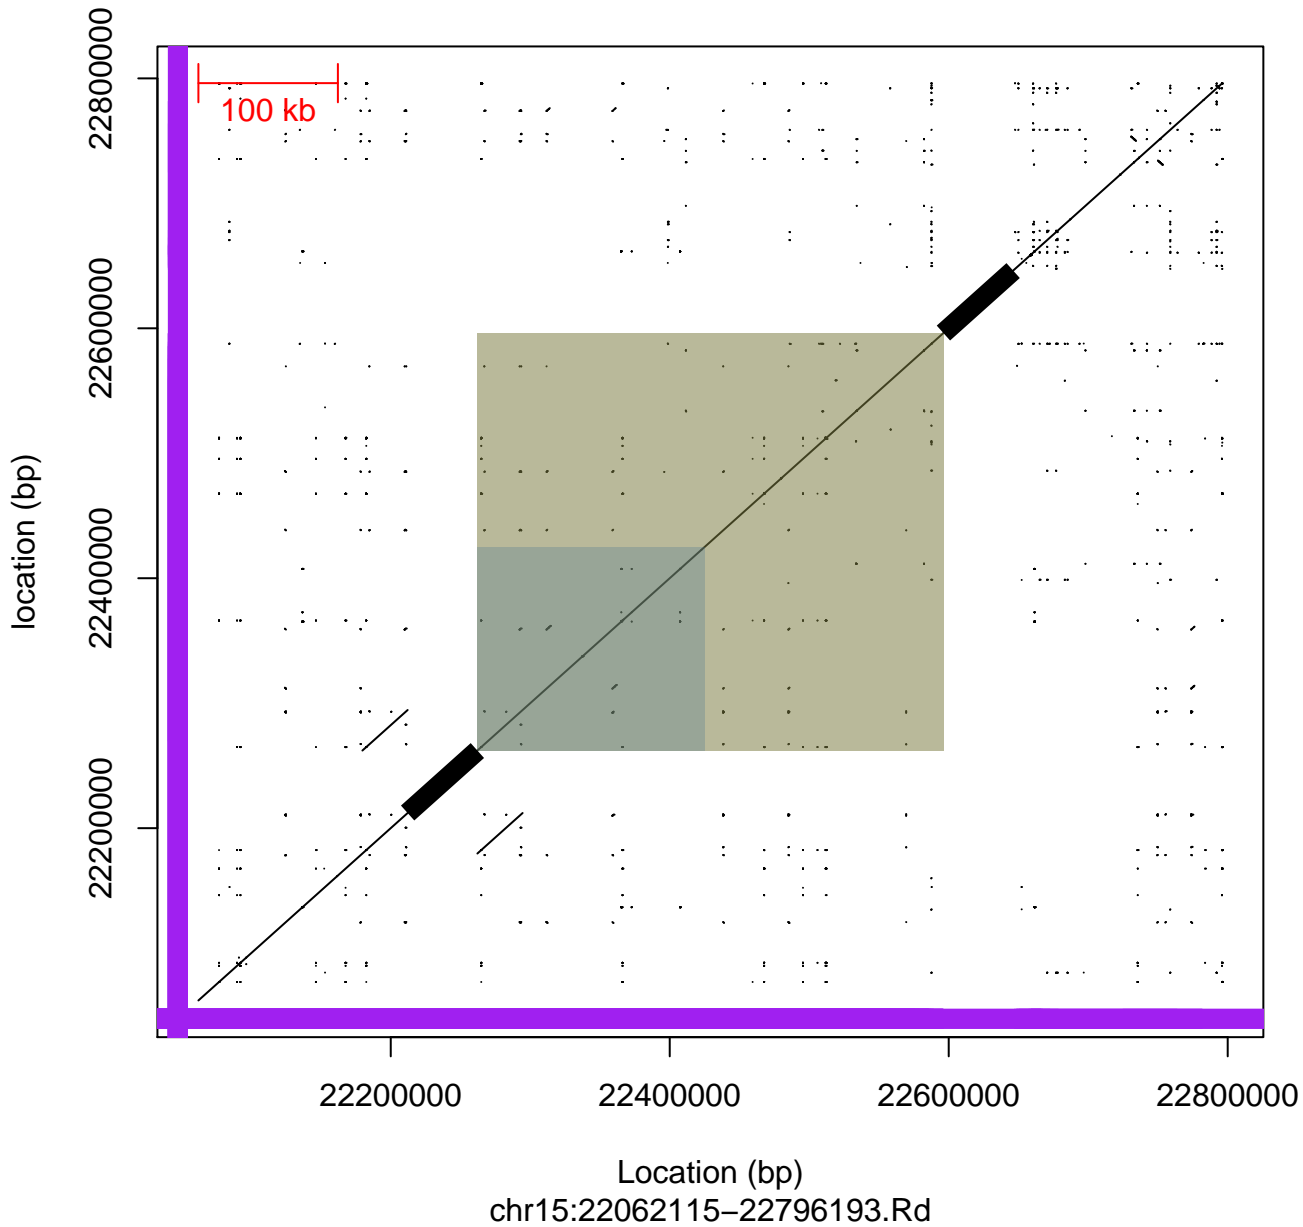

# Dotplot of mBM.15.2, fCB.15.3 on chr15

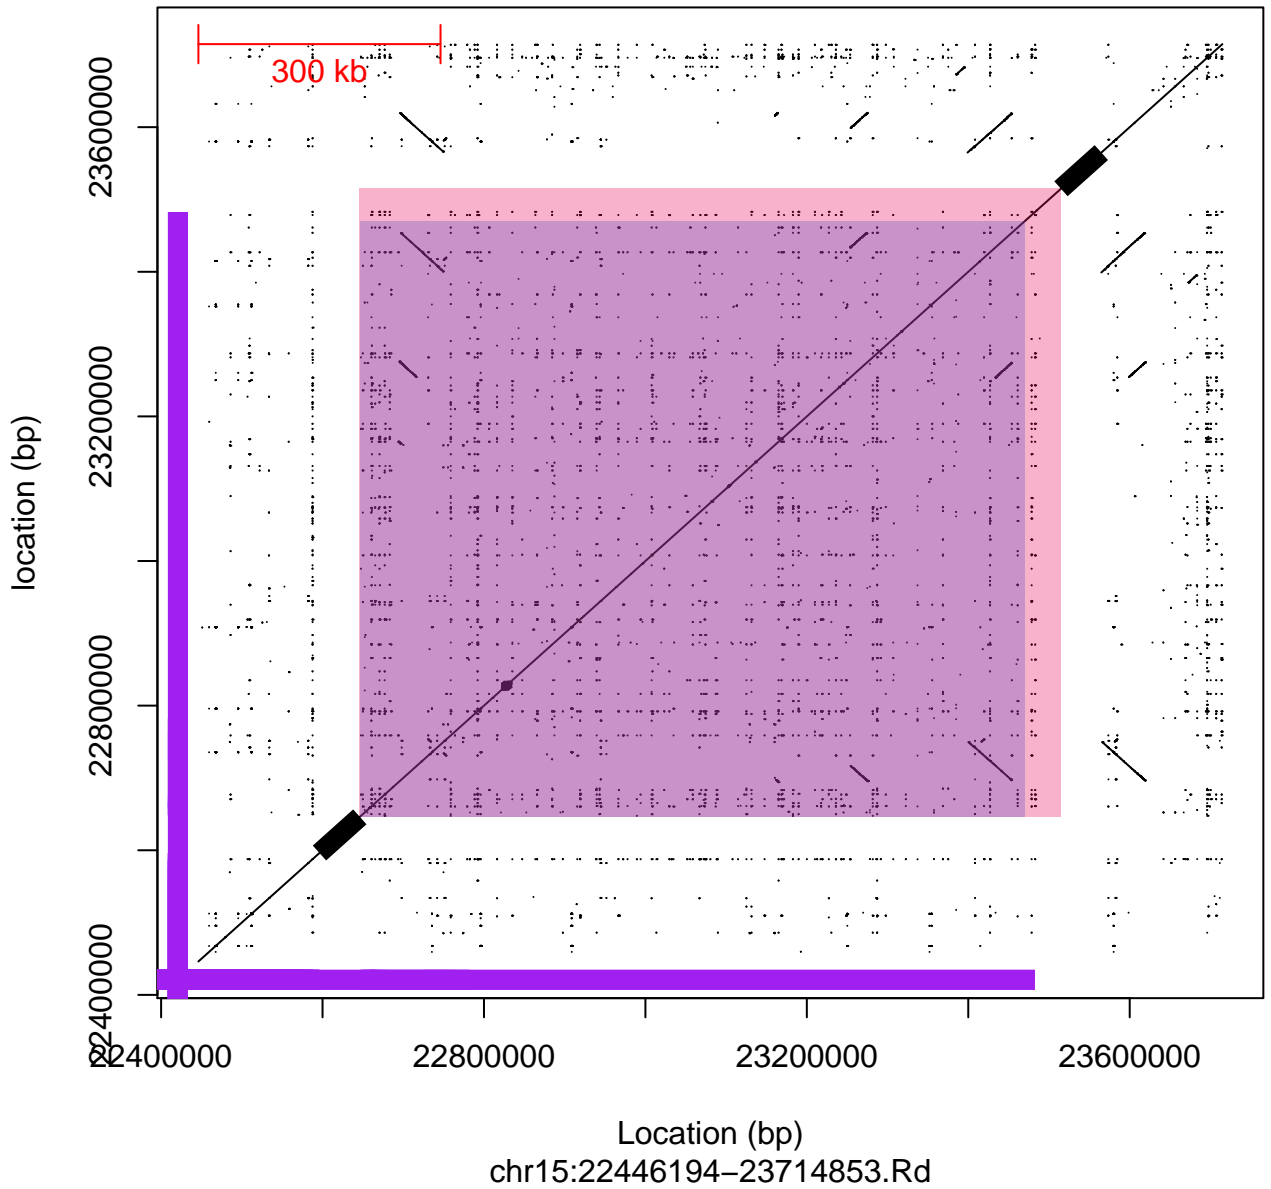



# Dotplot of fCB.15.4, ROIno.15.8, ROIno.15.9, ROIno.15.10 on chr15

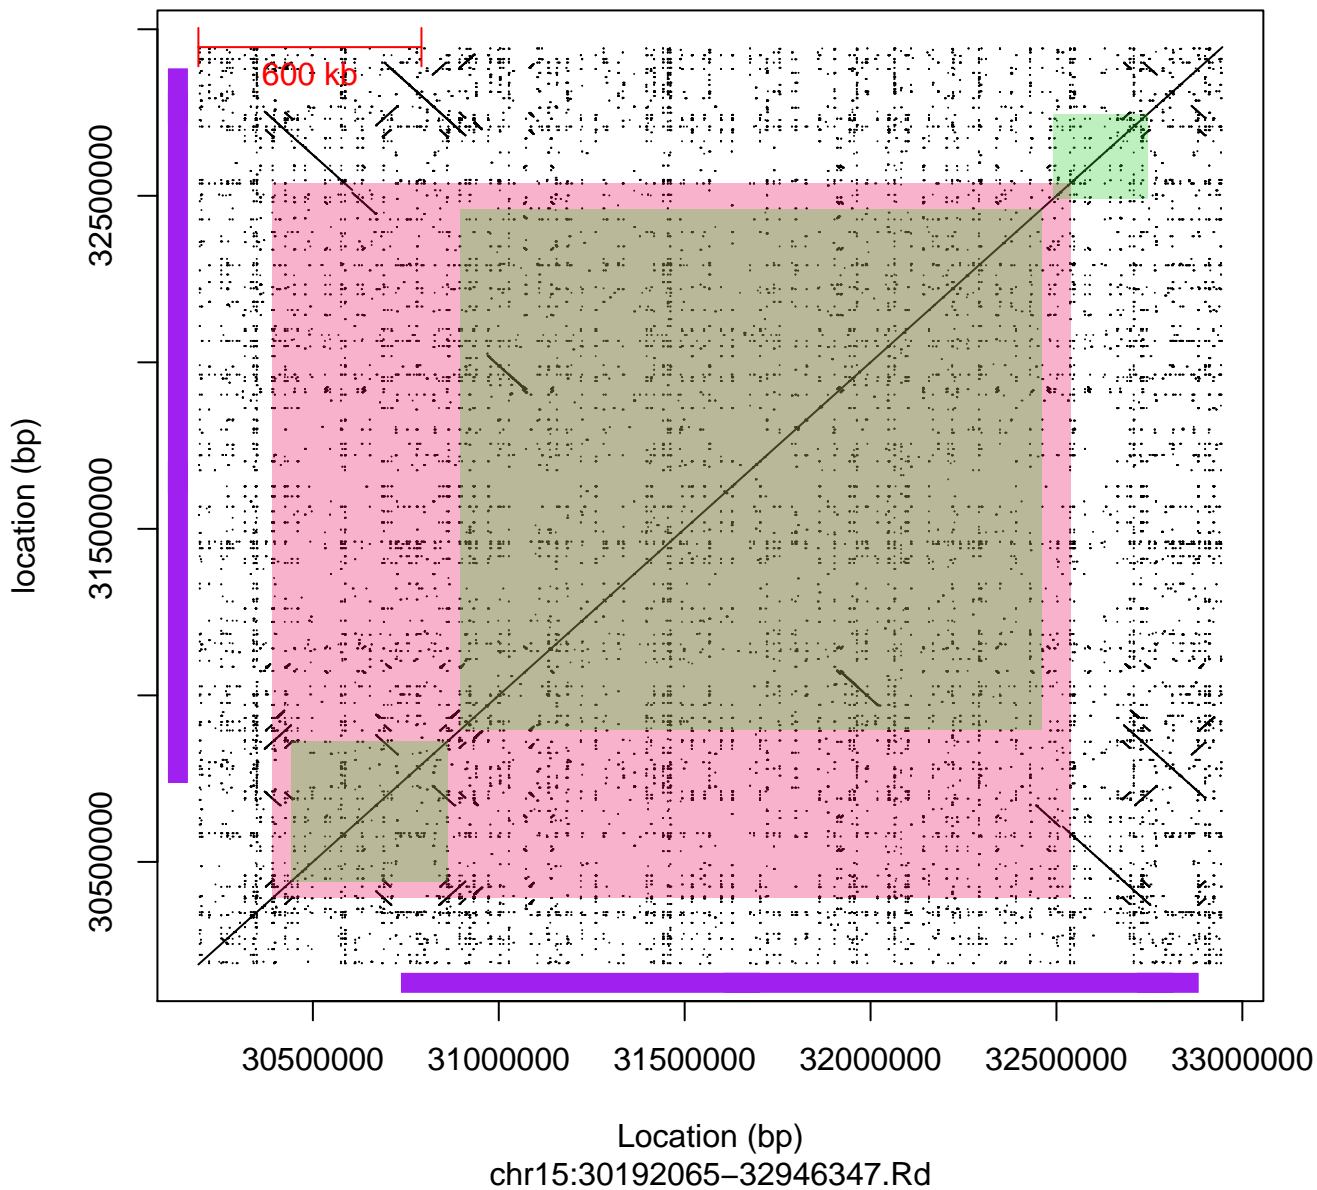

# Dotplot of mBM.15.3, fCB.15.5, ROIno.15.15 on chr15

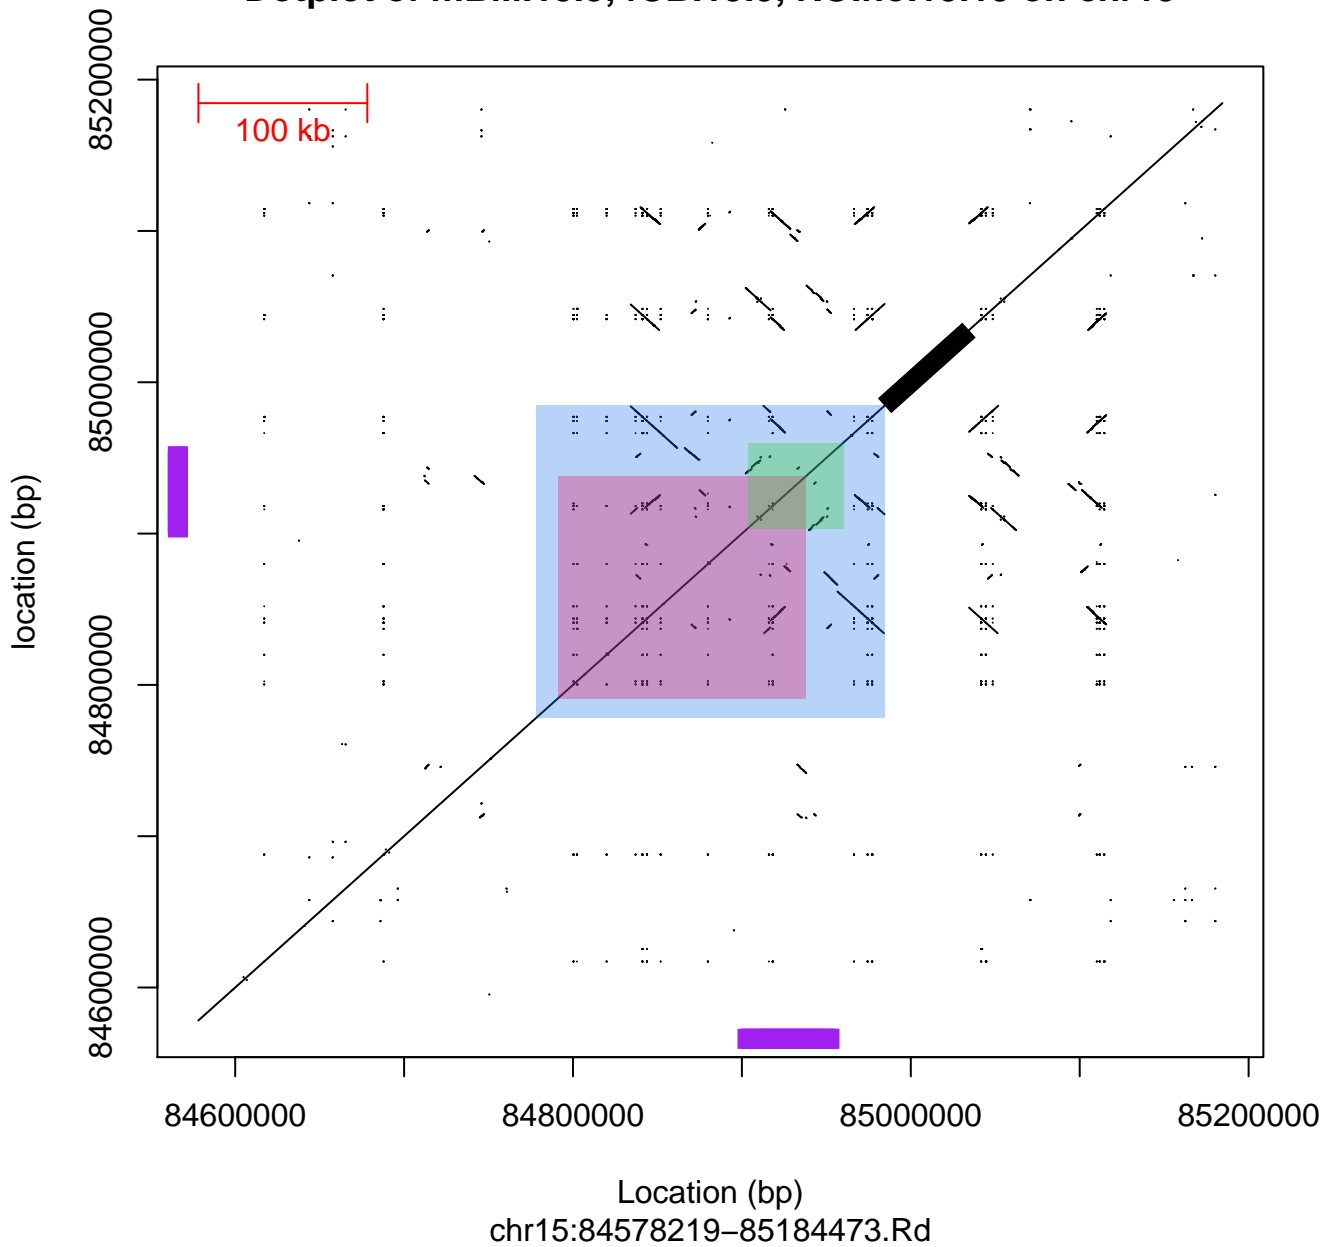

# Dotplot of ROIno.15.16 on chr15

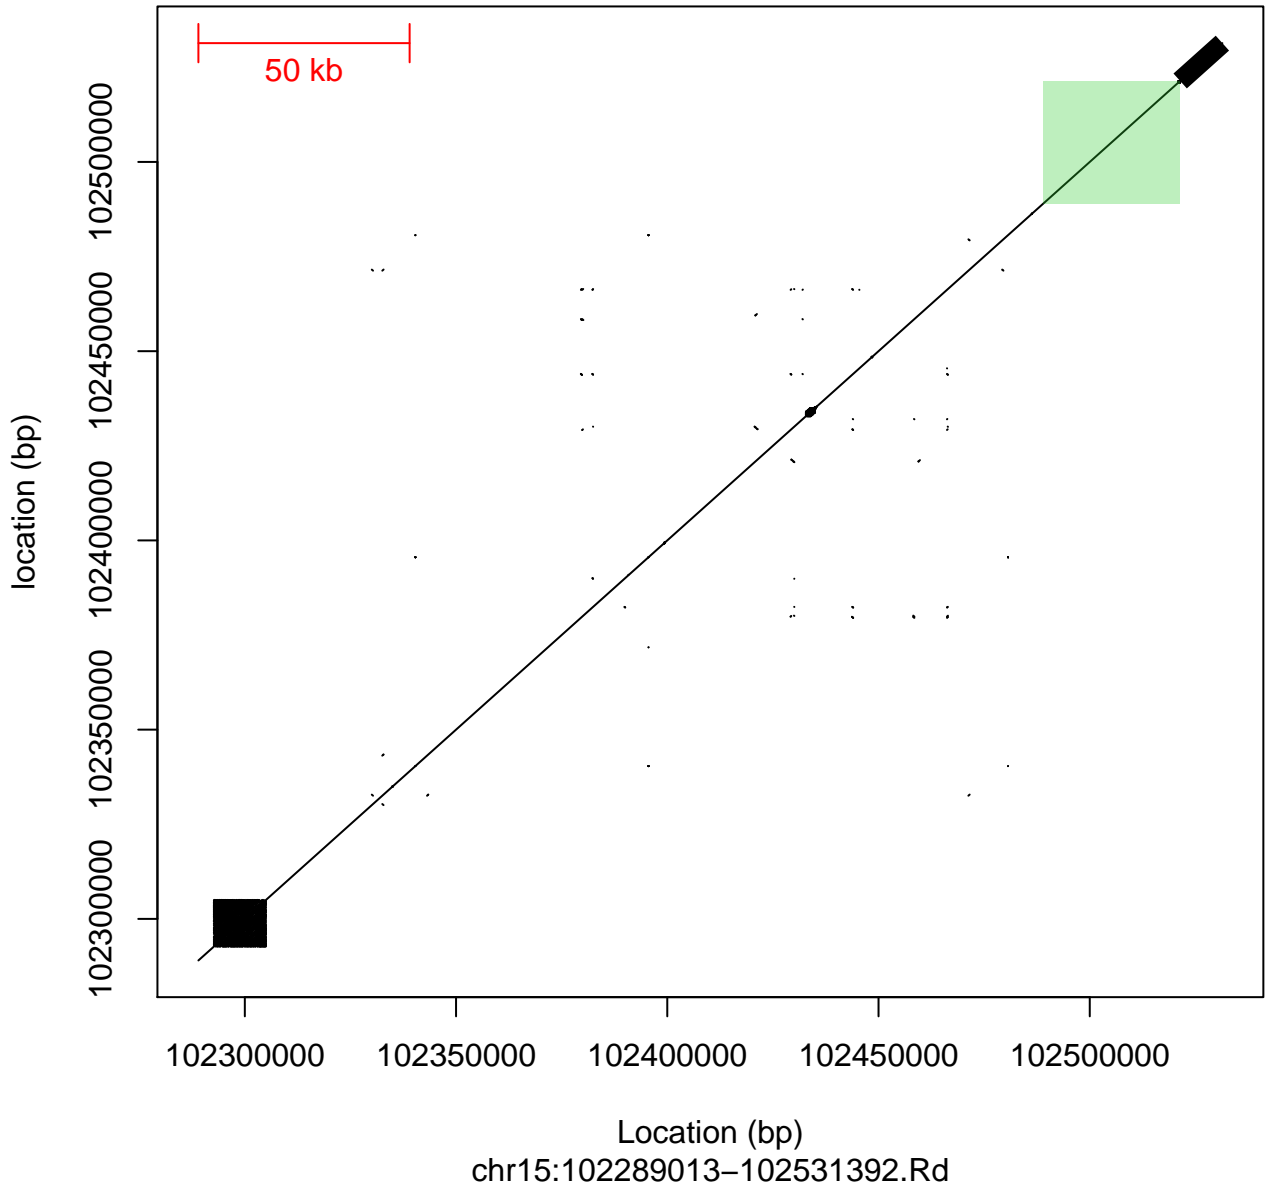

# Dotplot of mBM.16.1, fCB.16.1, ROIno.16.2 on chr16

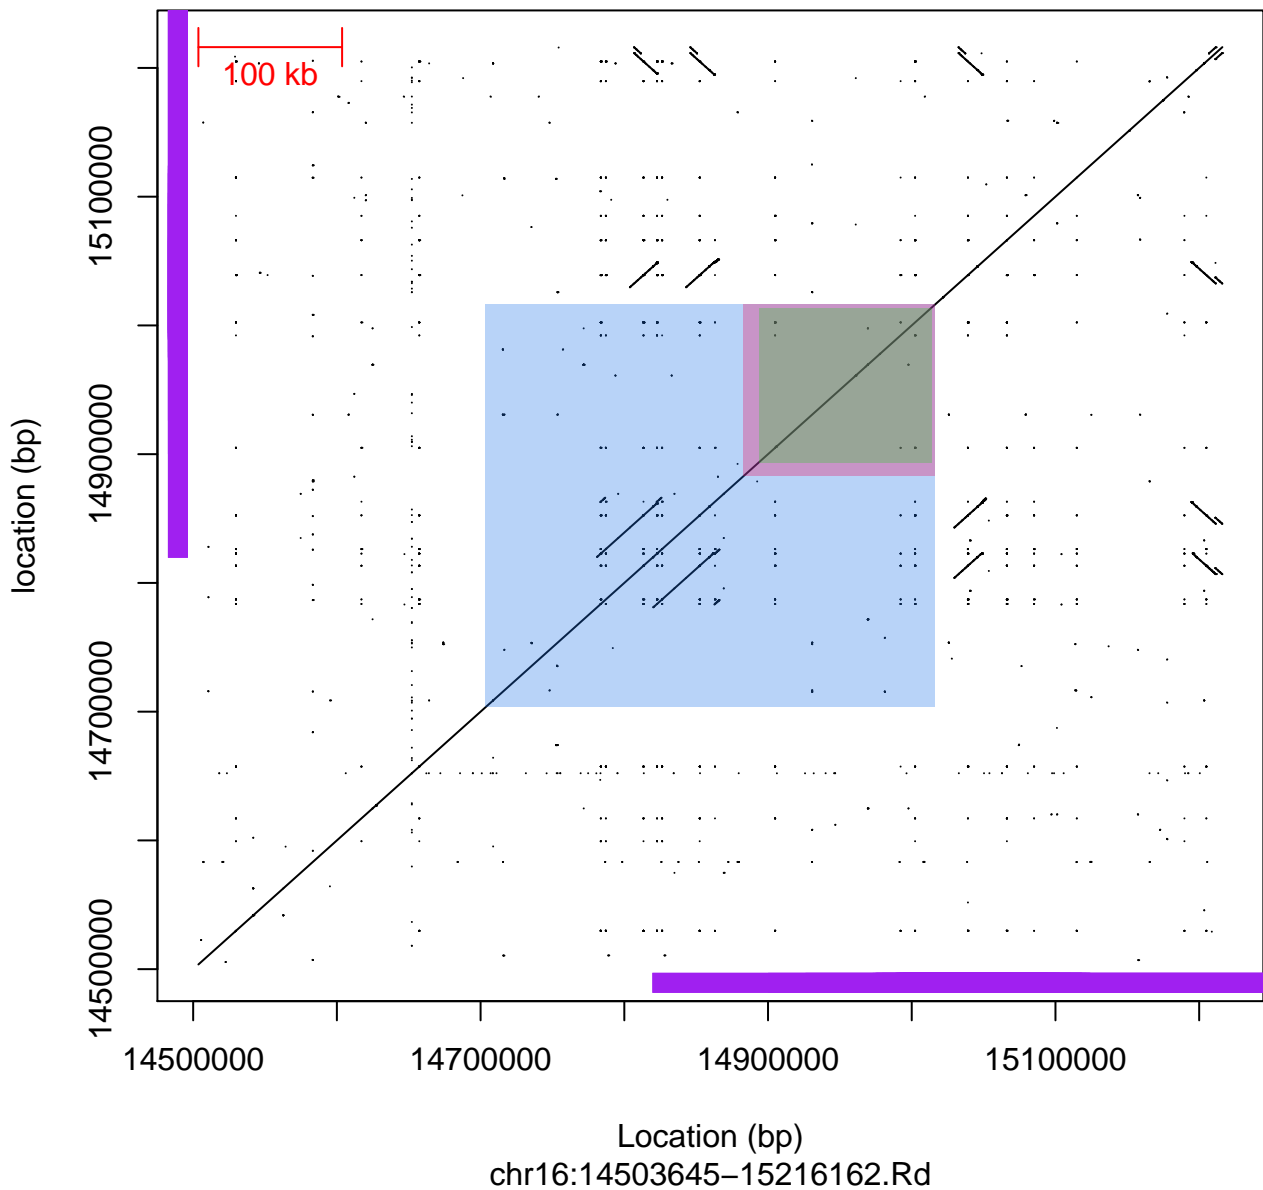

# Dotplot of mBM.16.2, fCB.16.2, ROIno.16.4 on chr16

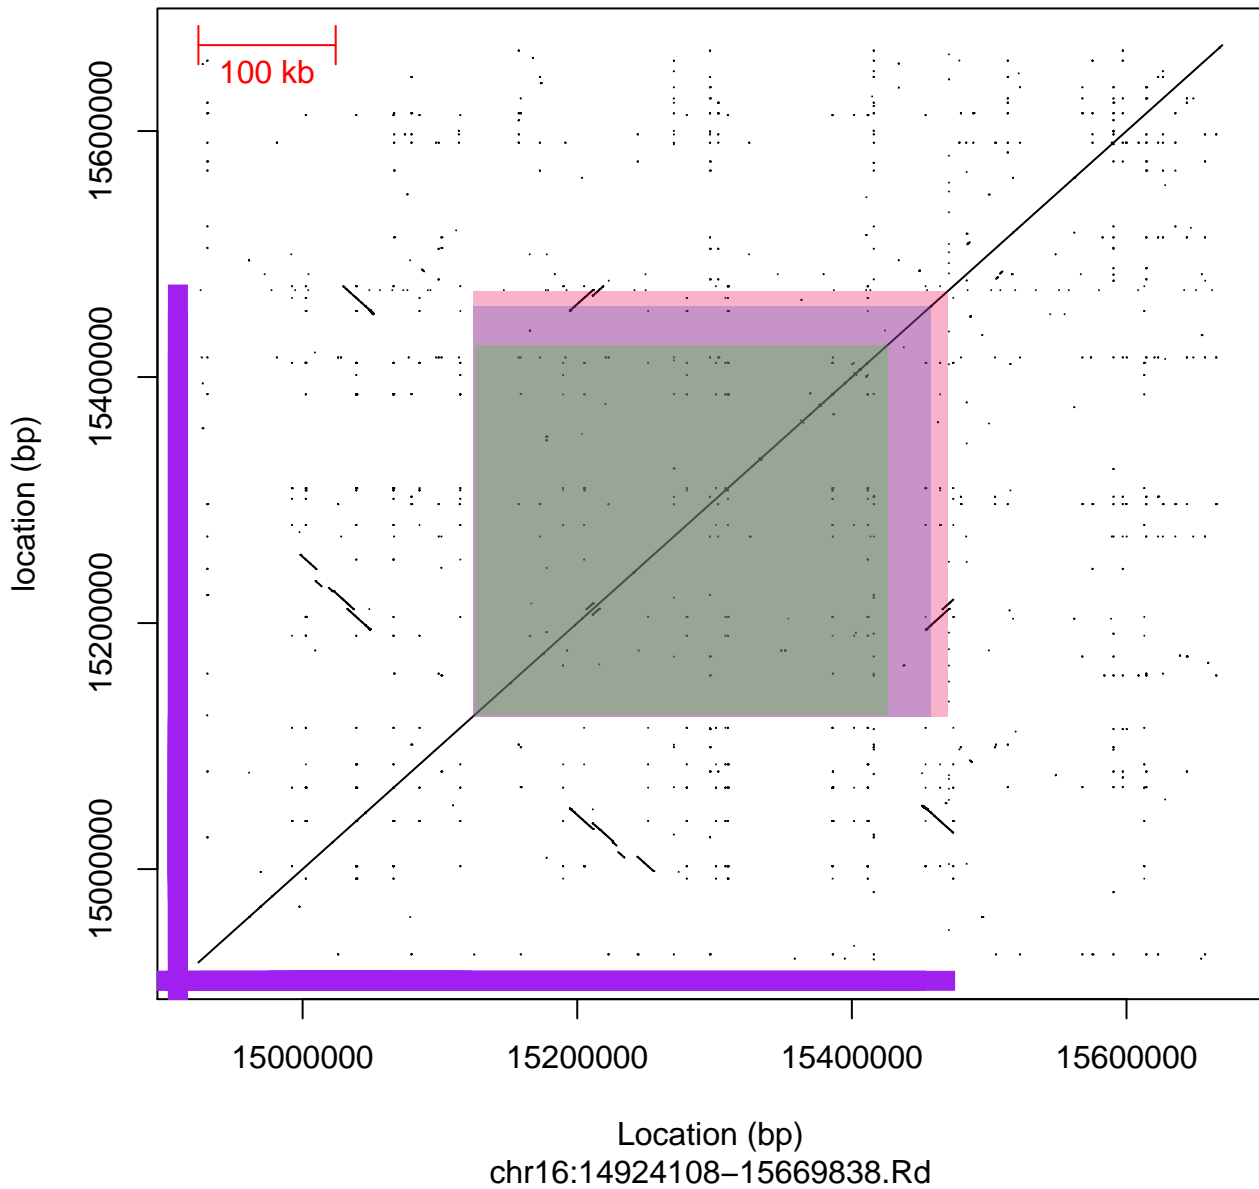

# Dotplot of ROI No.16.5 on chr16

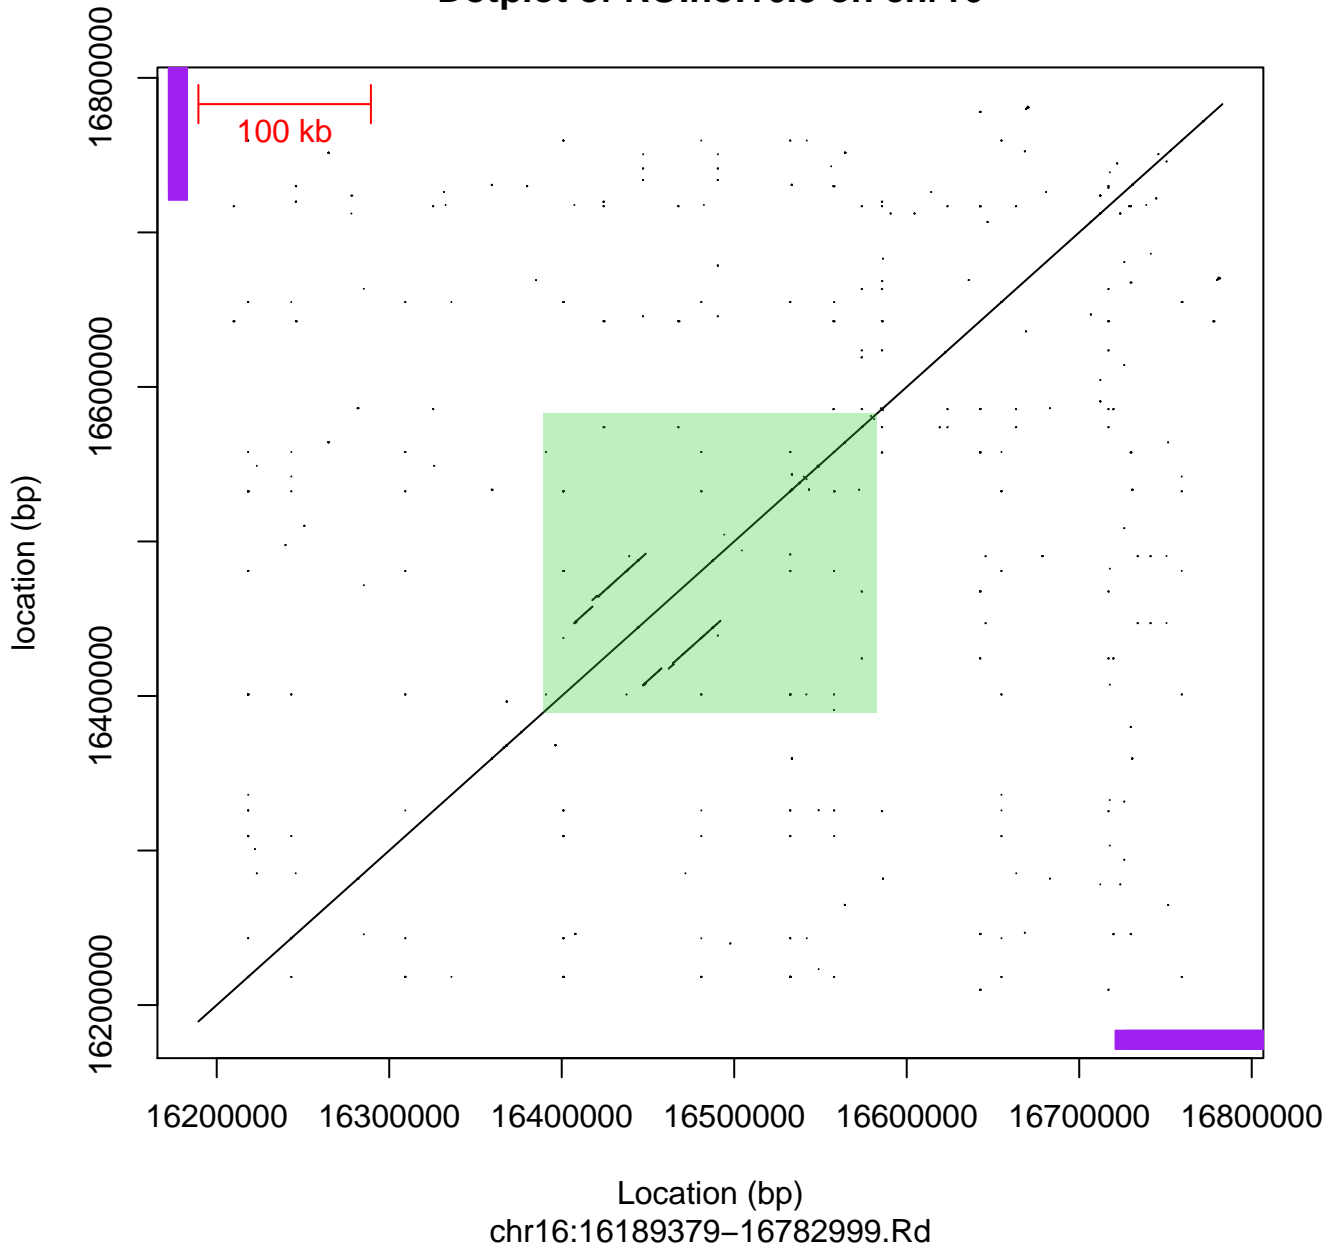

# Dotplot of ROIno.16.6, ROIno.16.7 on chr16

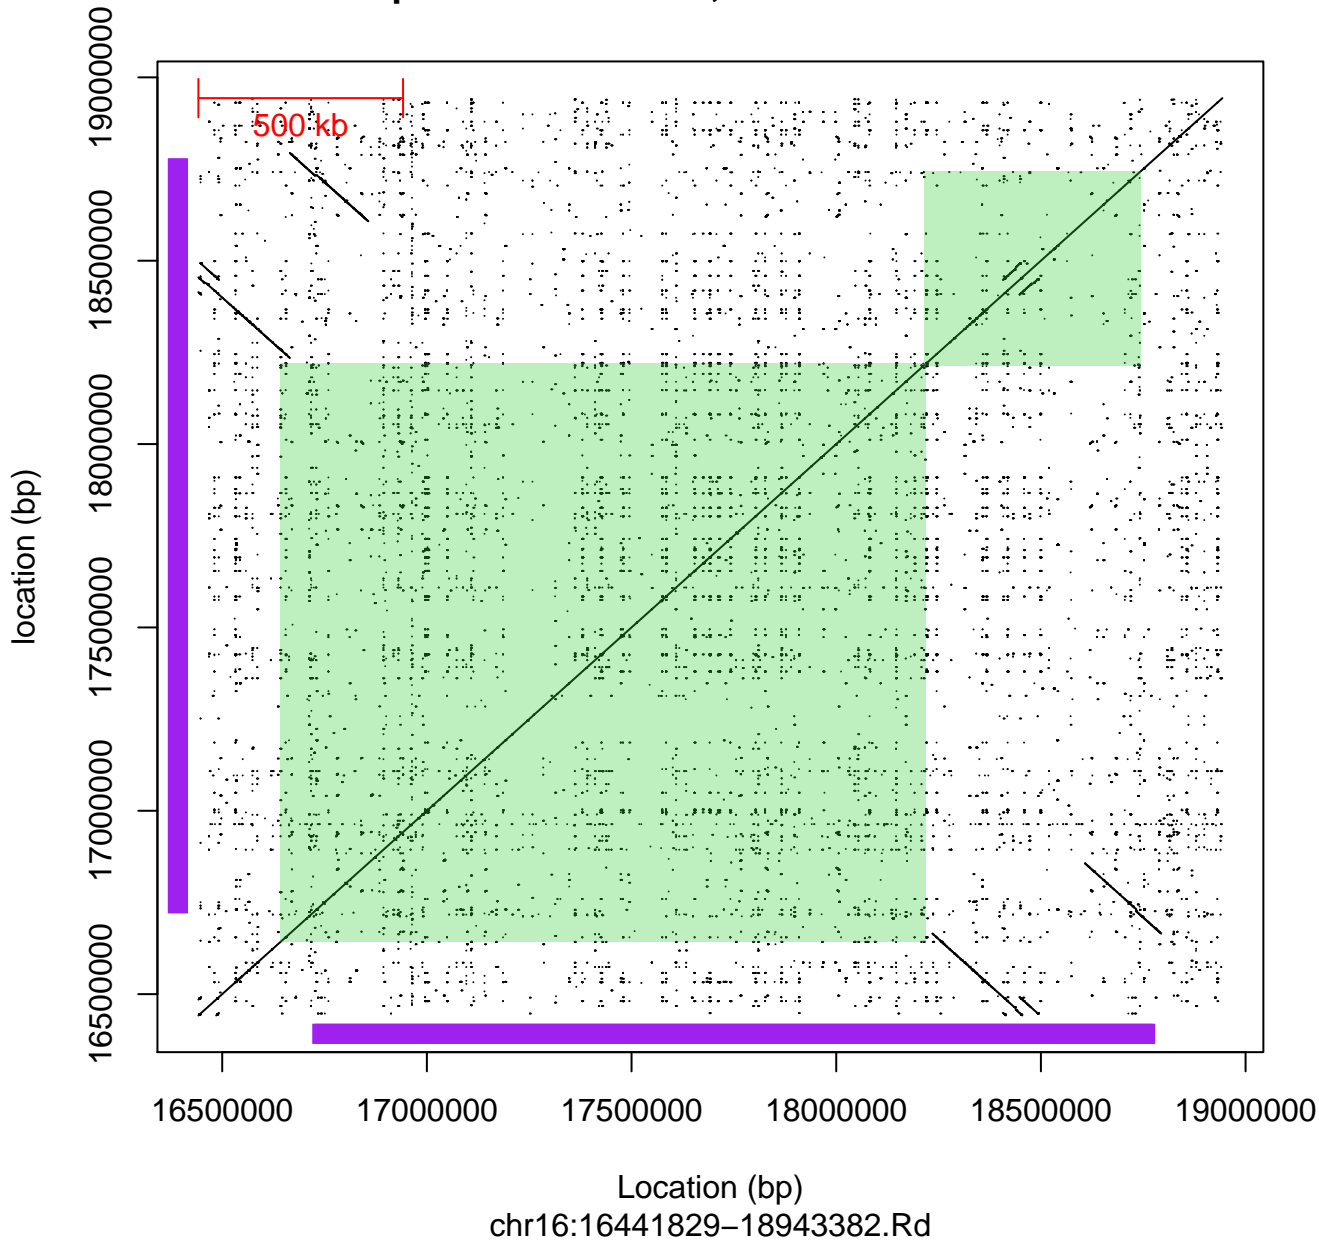

# Dotplot of mBM.16.3, fCB.16.3, ROIno.16.8, ROIno.16.9, ROIno.16.11 on chr16

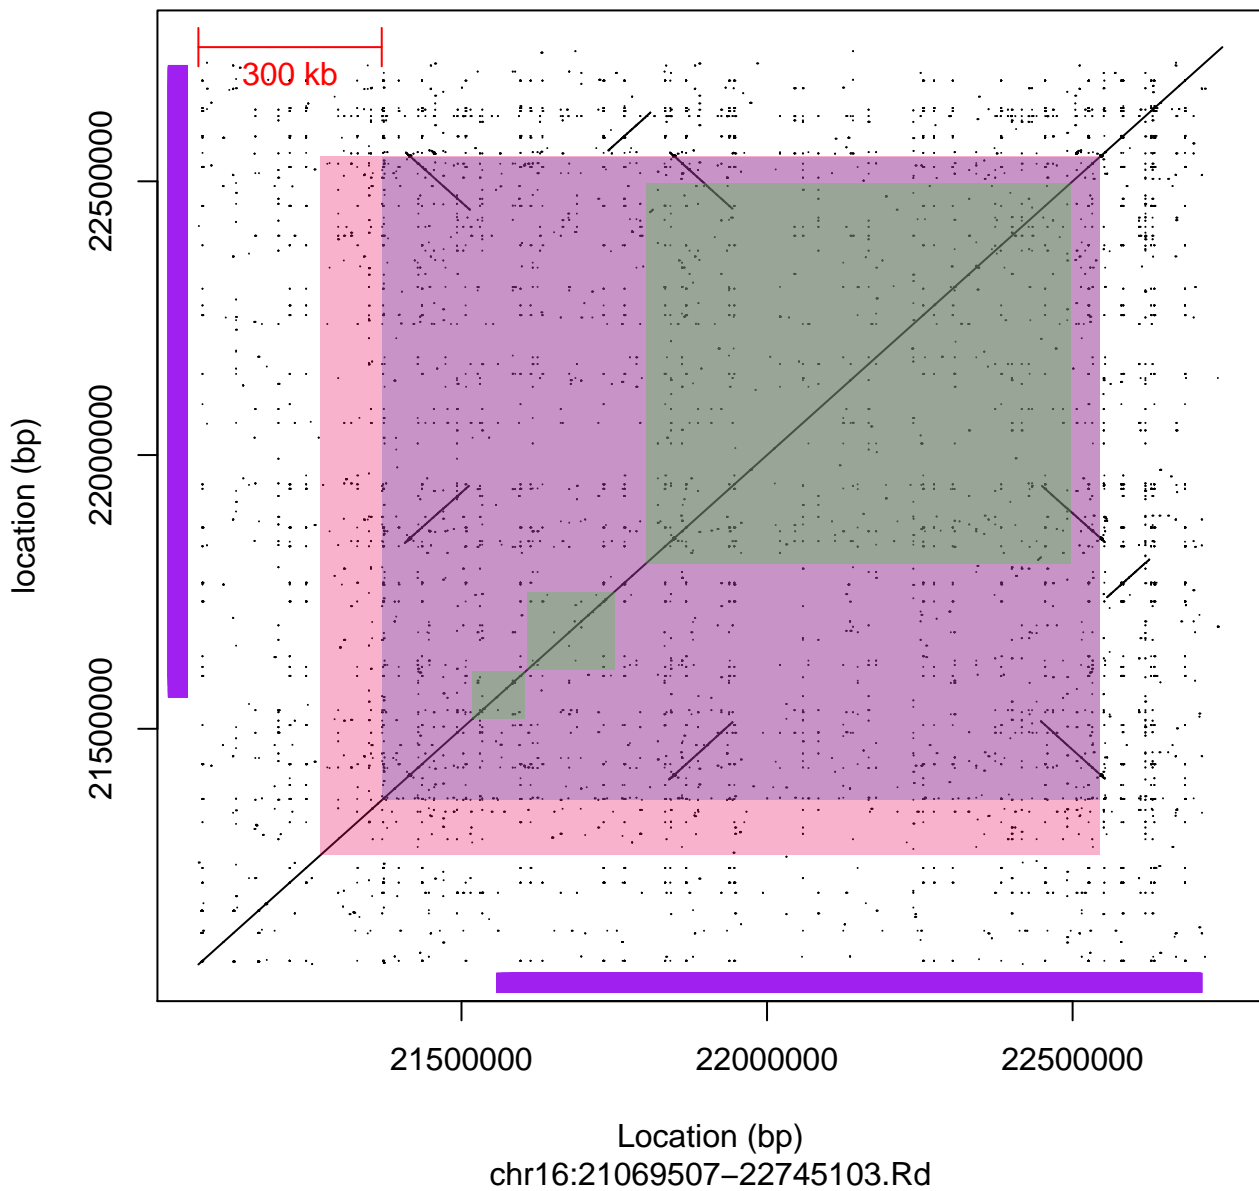





# Dotplot of ROIno.16.14, ROIno.16.15 on chr16

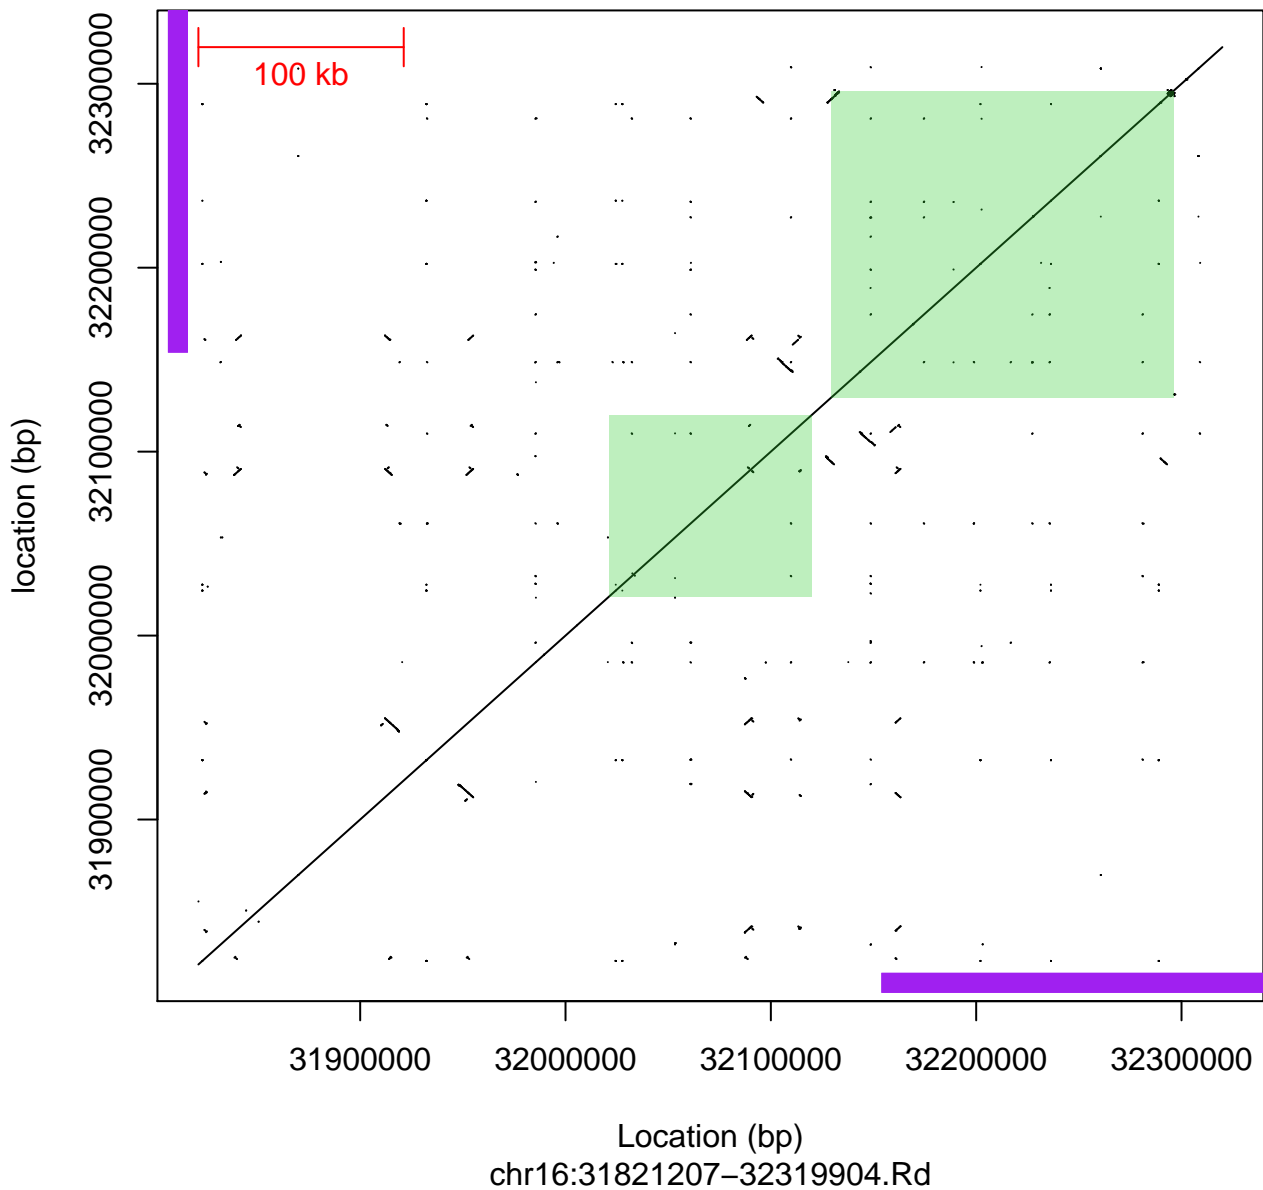

# Dotplot of ROIno.16.14, ROIno.16.15 on chr16

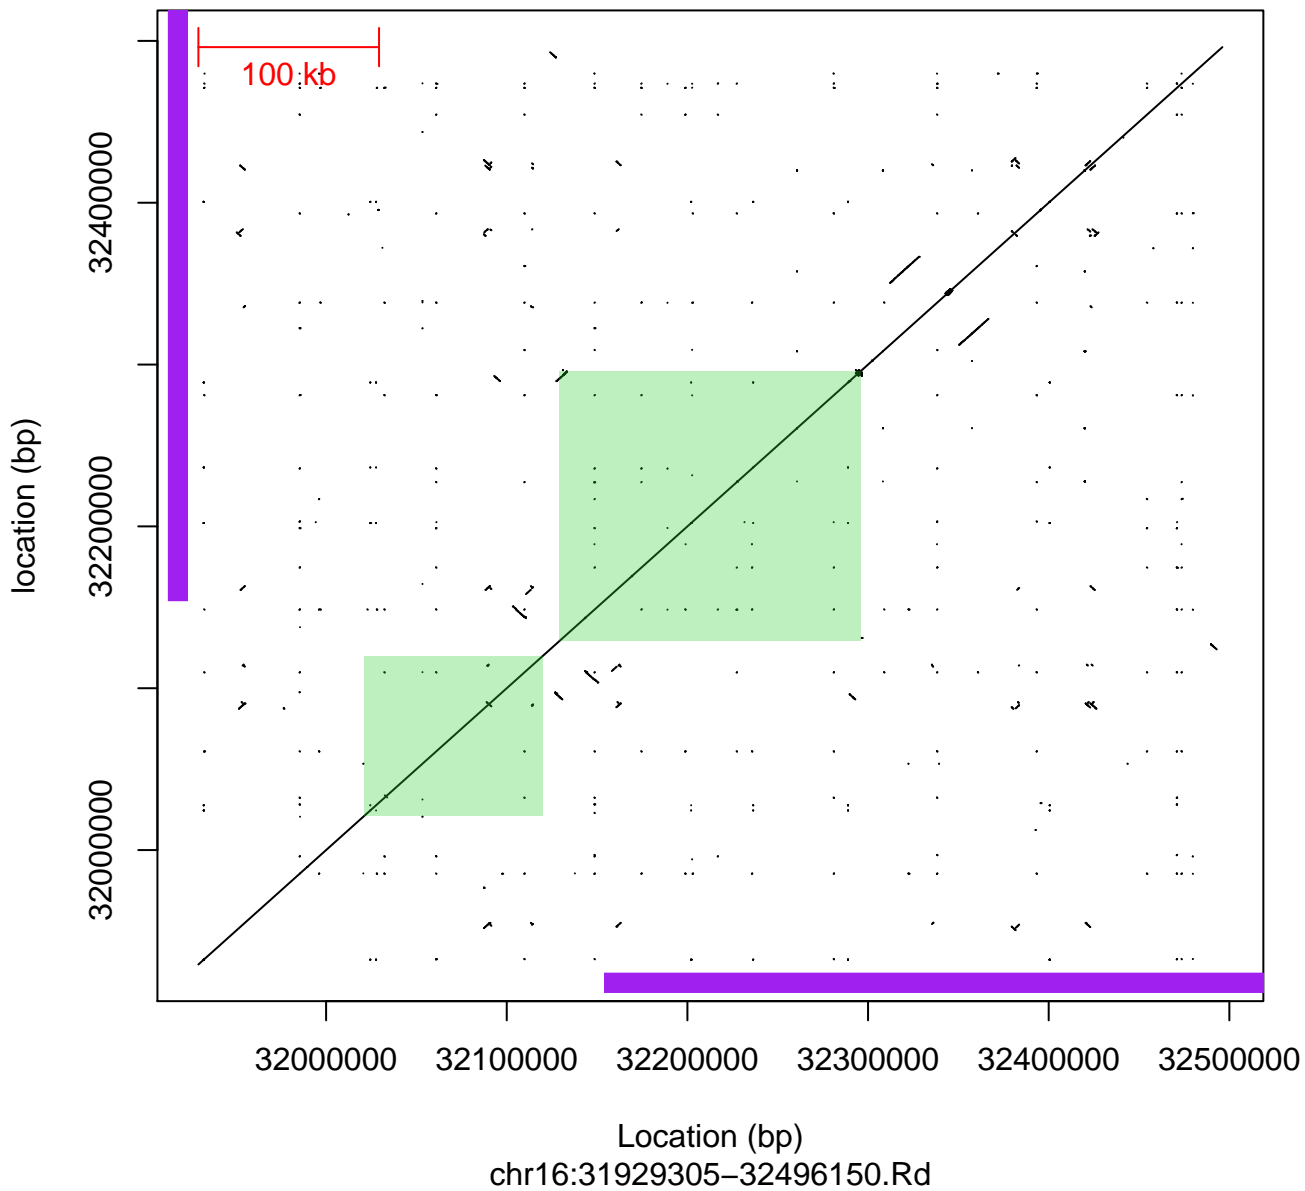

Dotplot of mBM.16.5, fCB.16.5, ROIno.16.17, ROIno.16.18, ROIno.16.19 on chr16

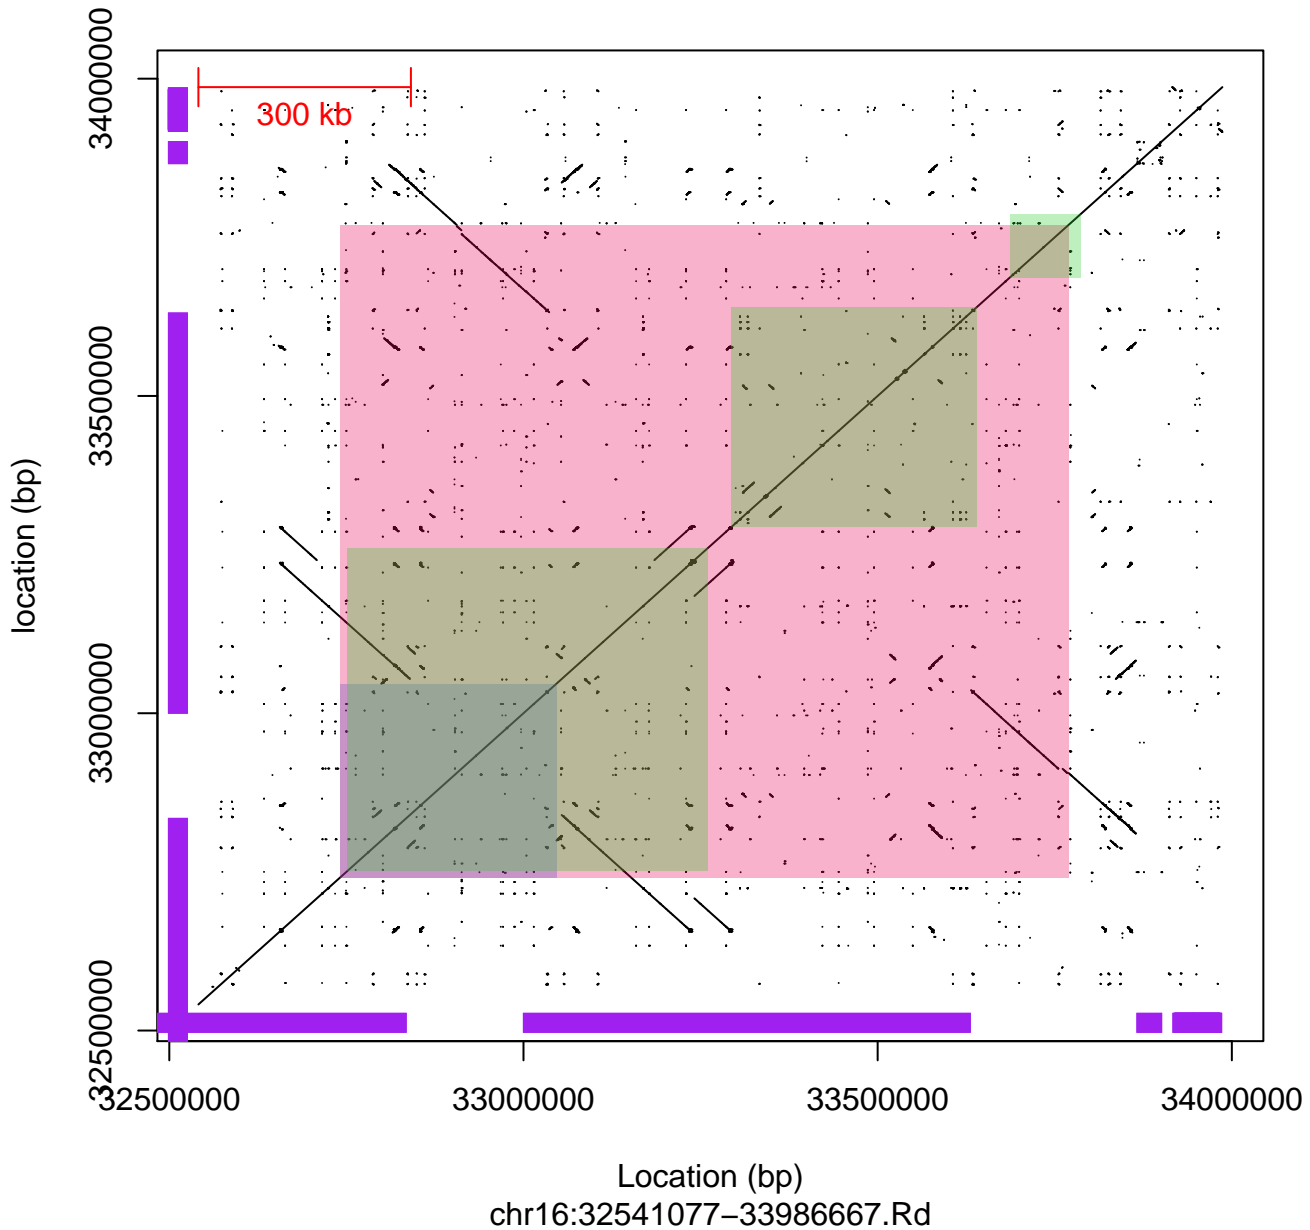

# Dotplot of mBM.16.6, fCB.16.6, fCB.16.7, fCB.16.8 on chr16

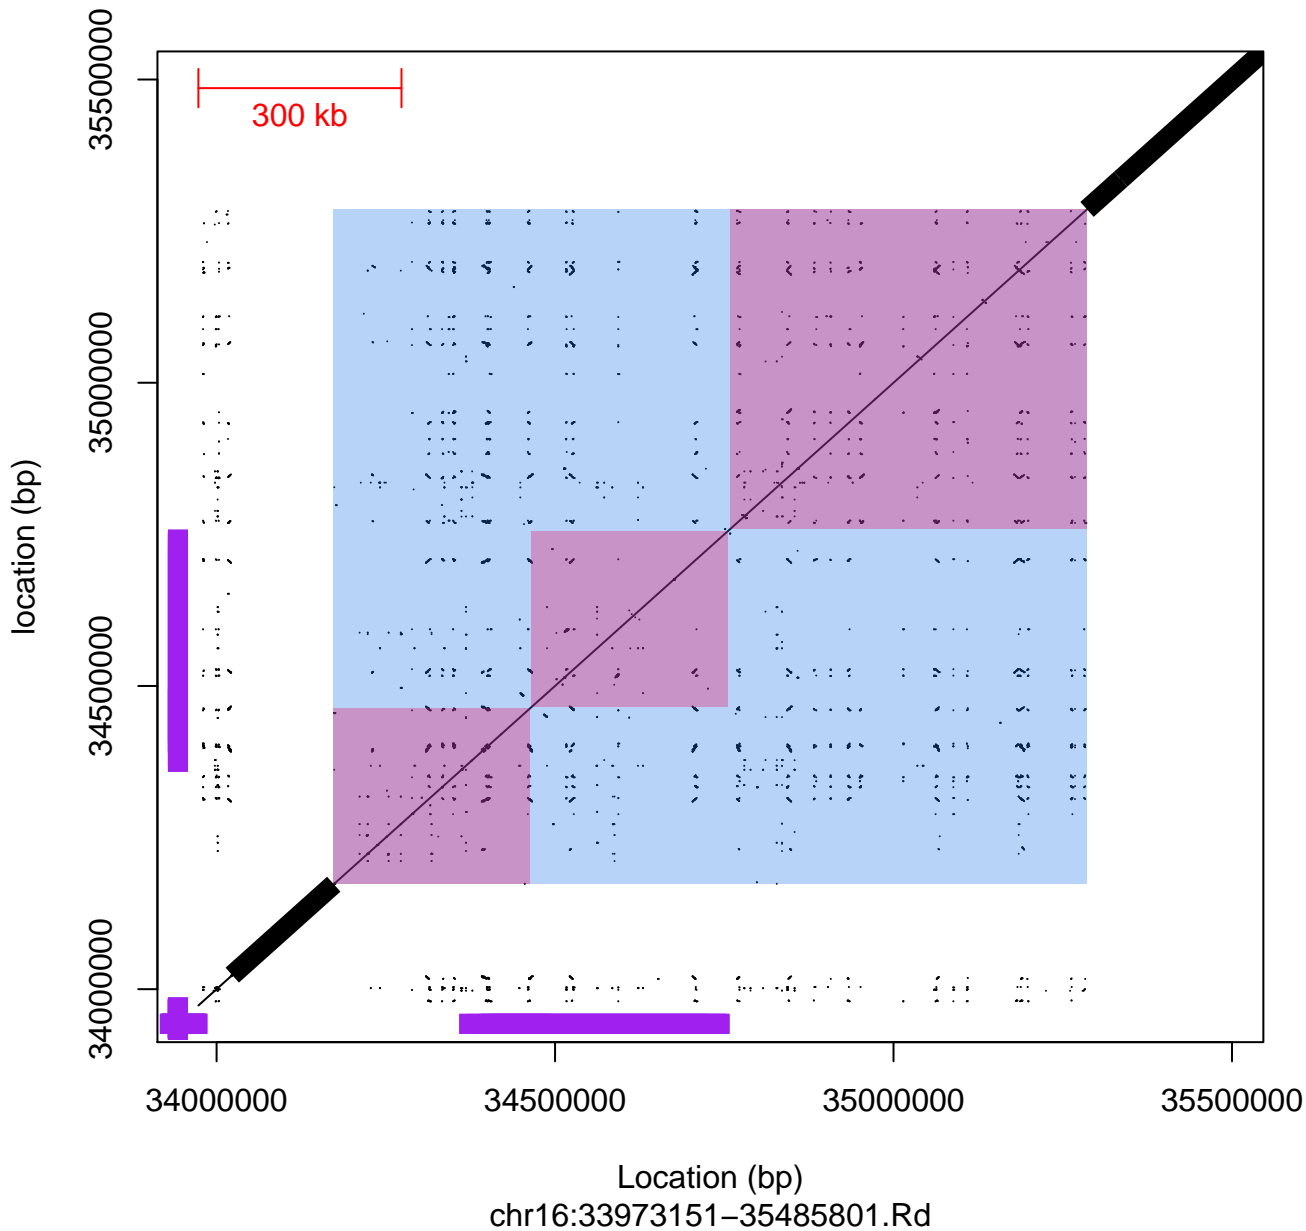

# Dotplot of mBM.16.7, fCB.16.9 on chr16

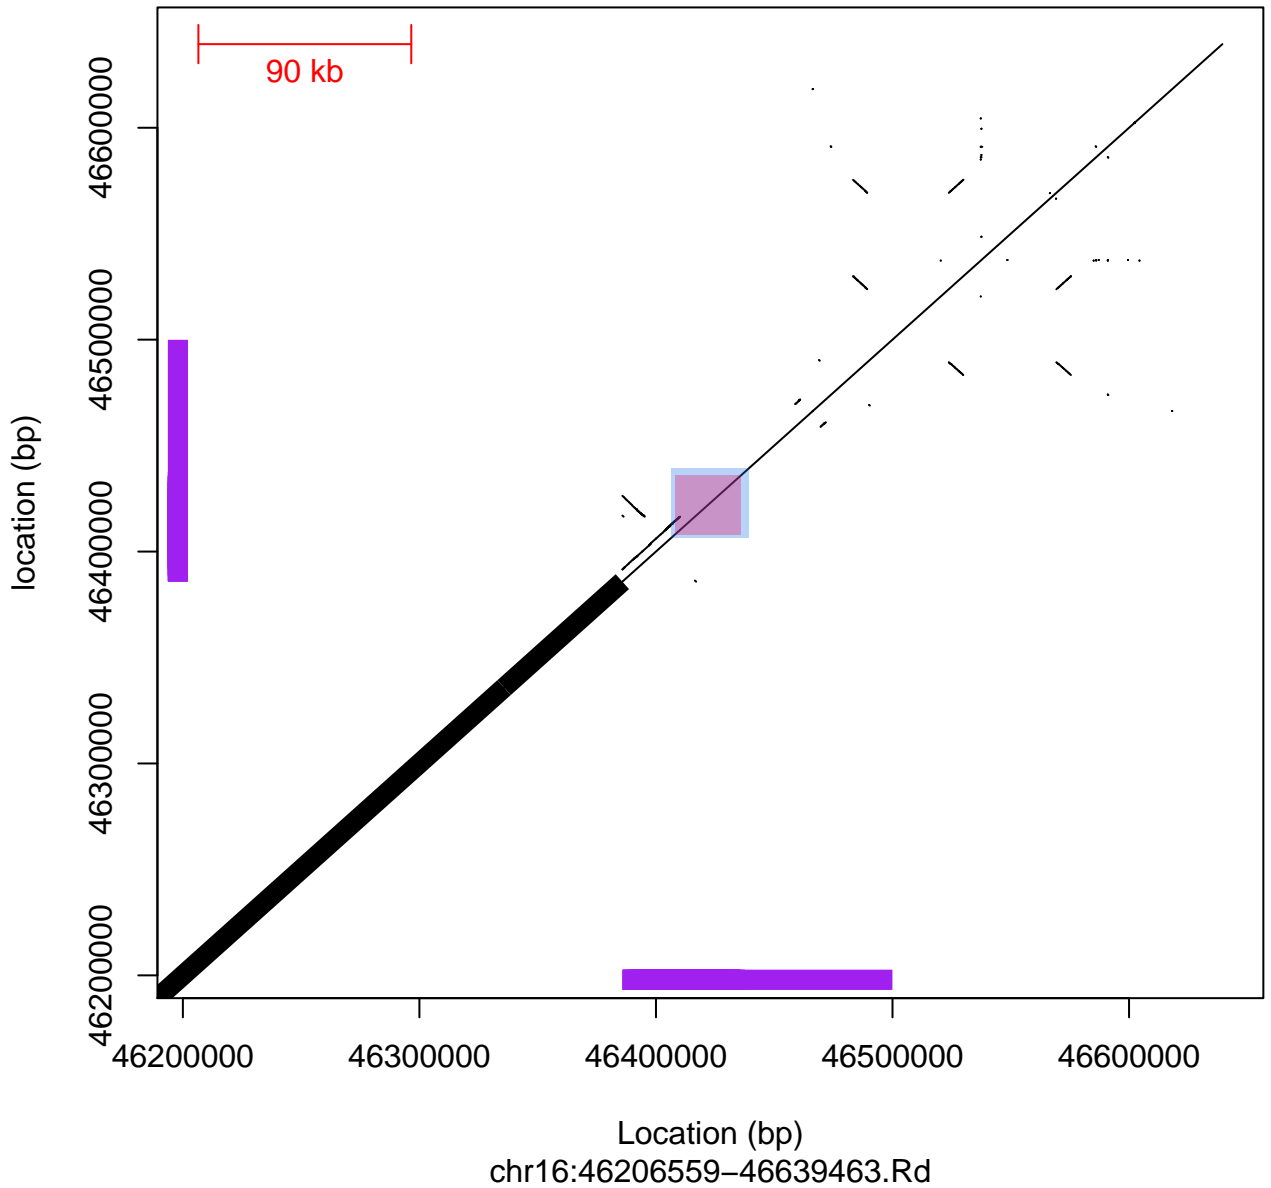

# Dotplot of ROIno.16.25 on chr16

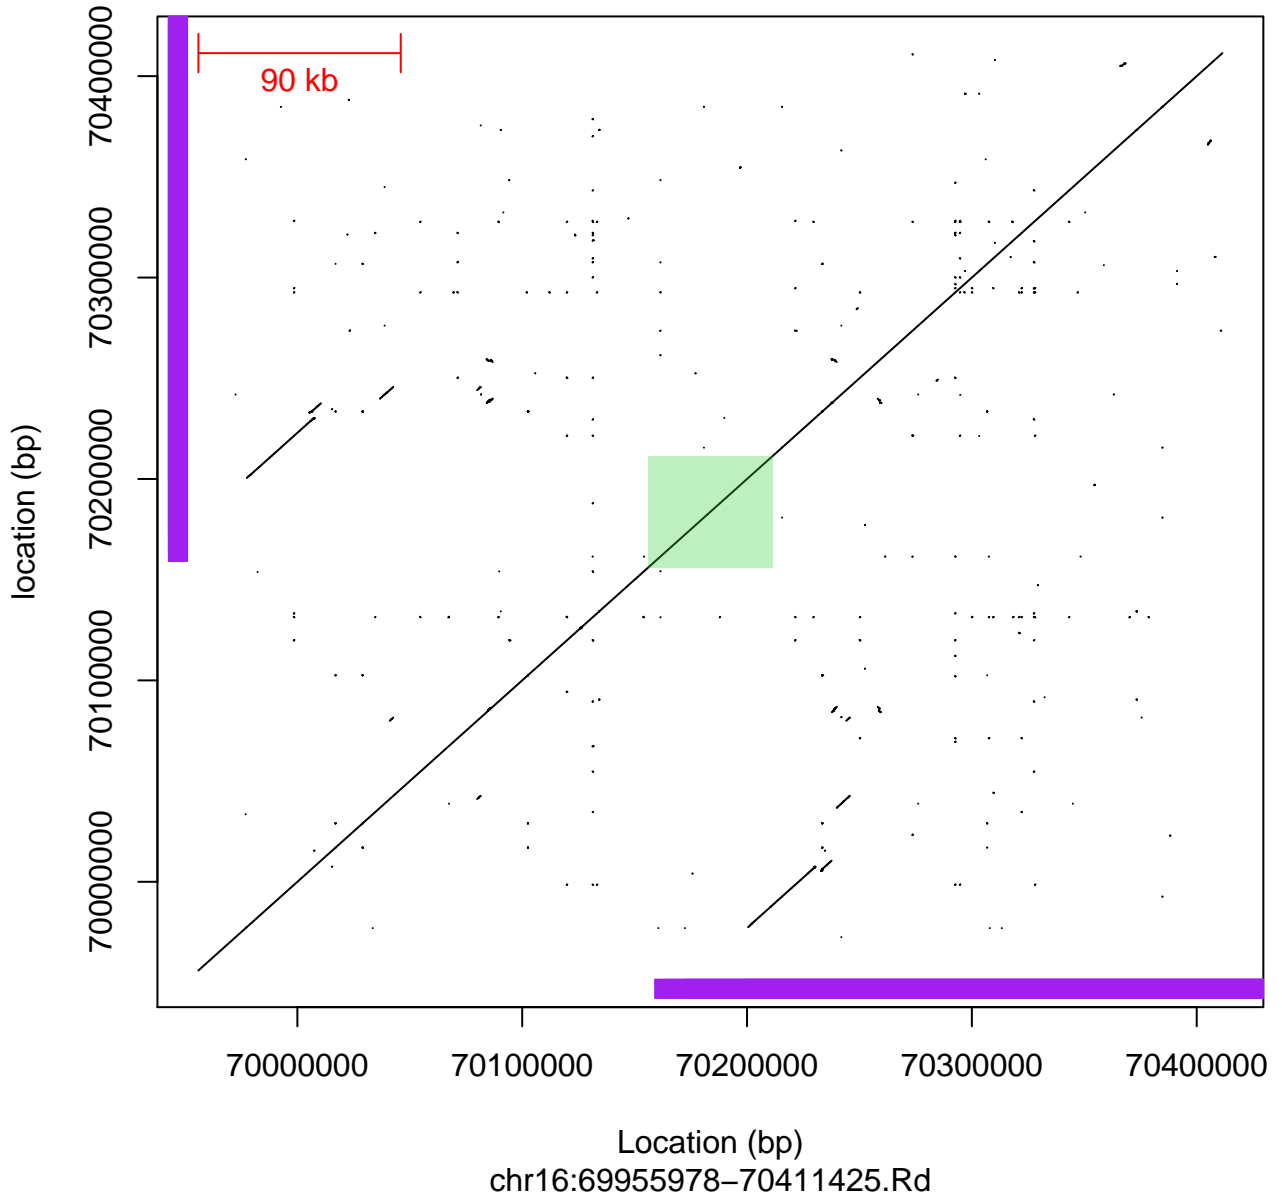

# Dotplot of mBM.16.8, ROIno.16.26 on chr16

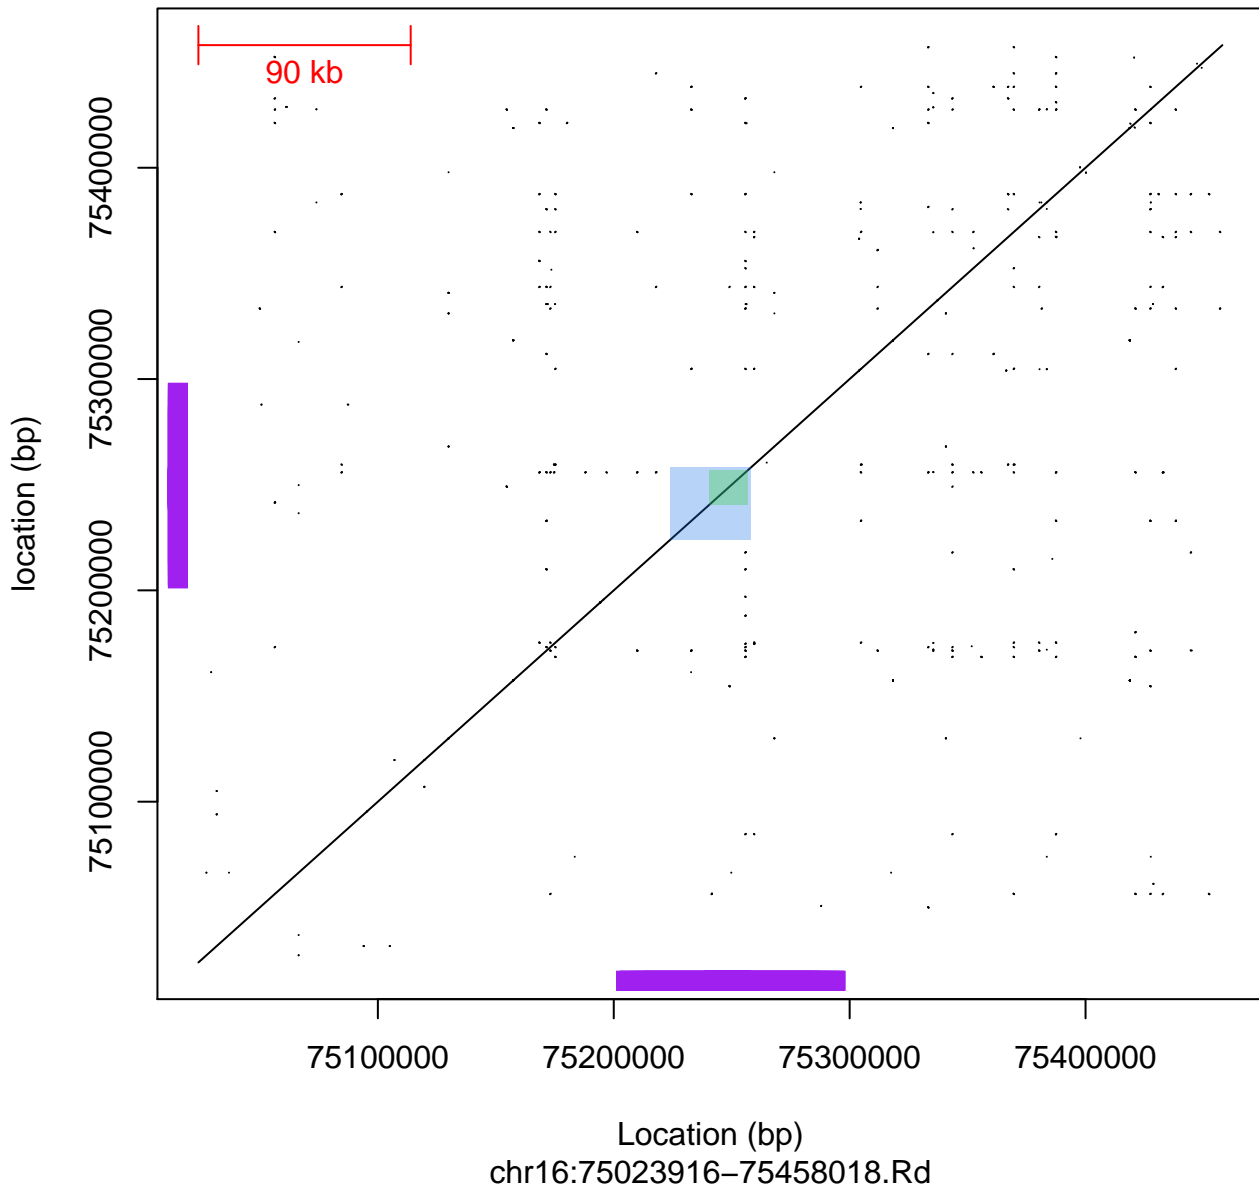



# Dotplot of ROI No.17.1 on chr17

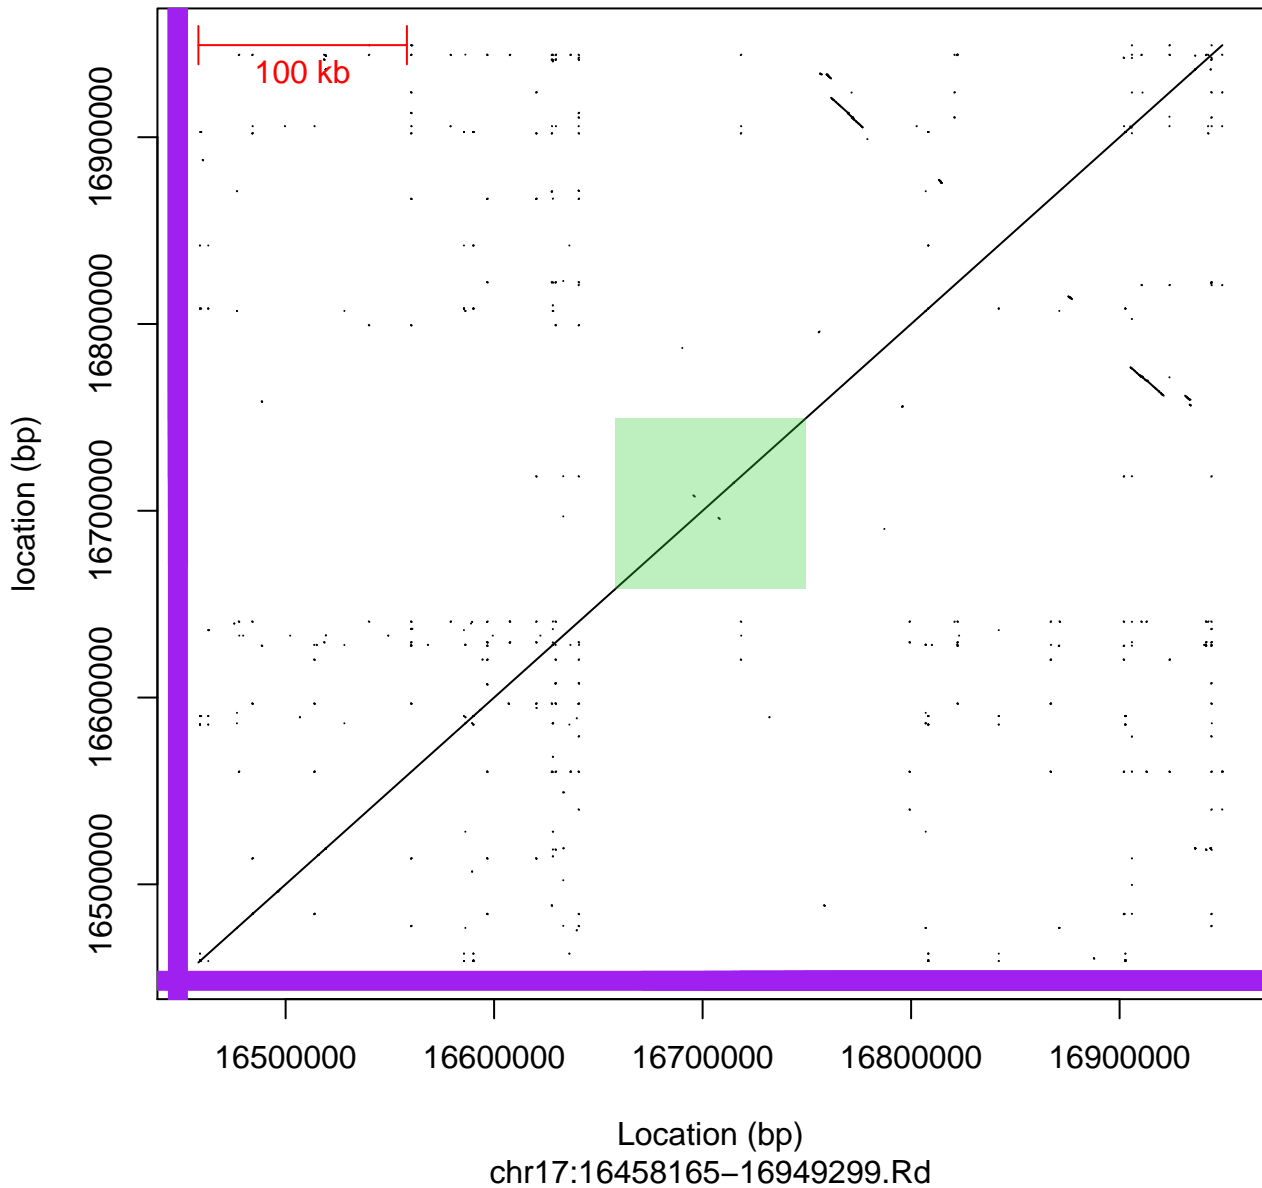

# Dotplot of mBM.17.1, ROIno.17.2 on chr17

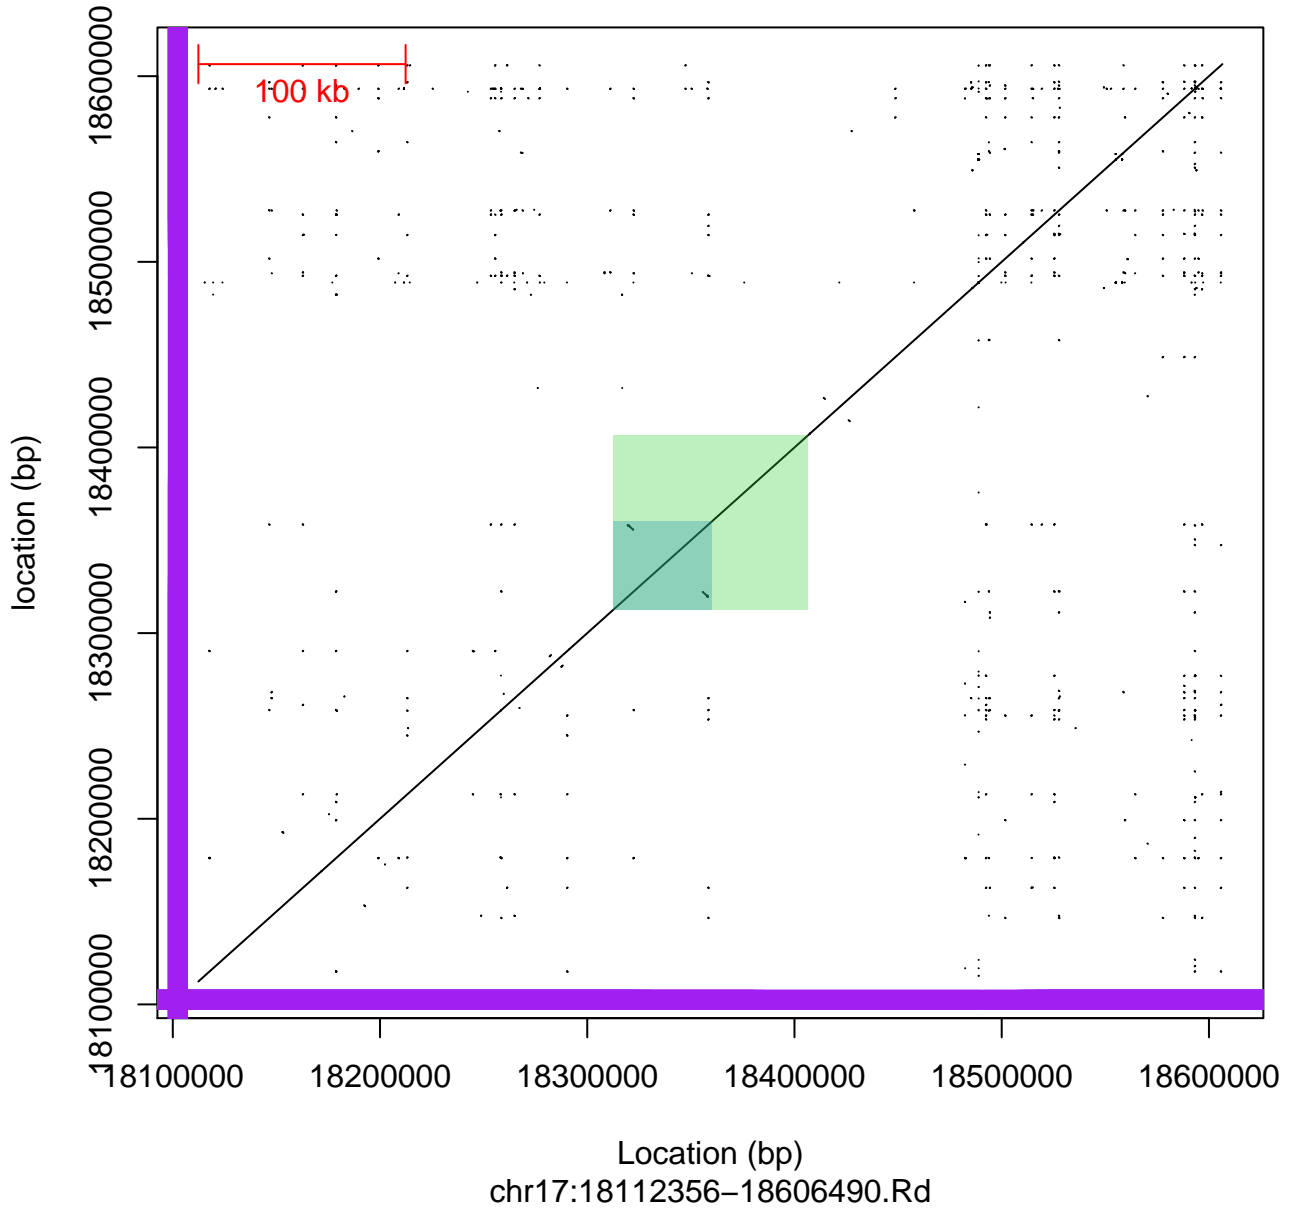

# Dotplot of mBM.17.2, fCB.17.1, ROIno.17.4, ROIno.17.5 on chr17

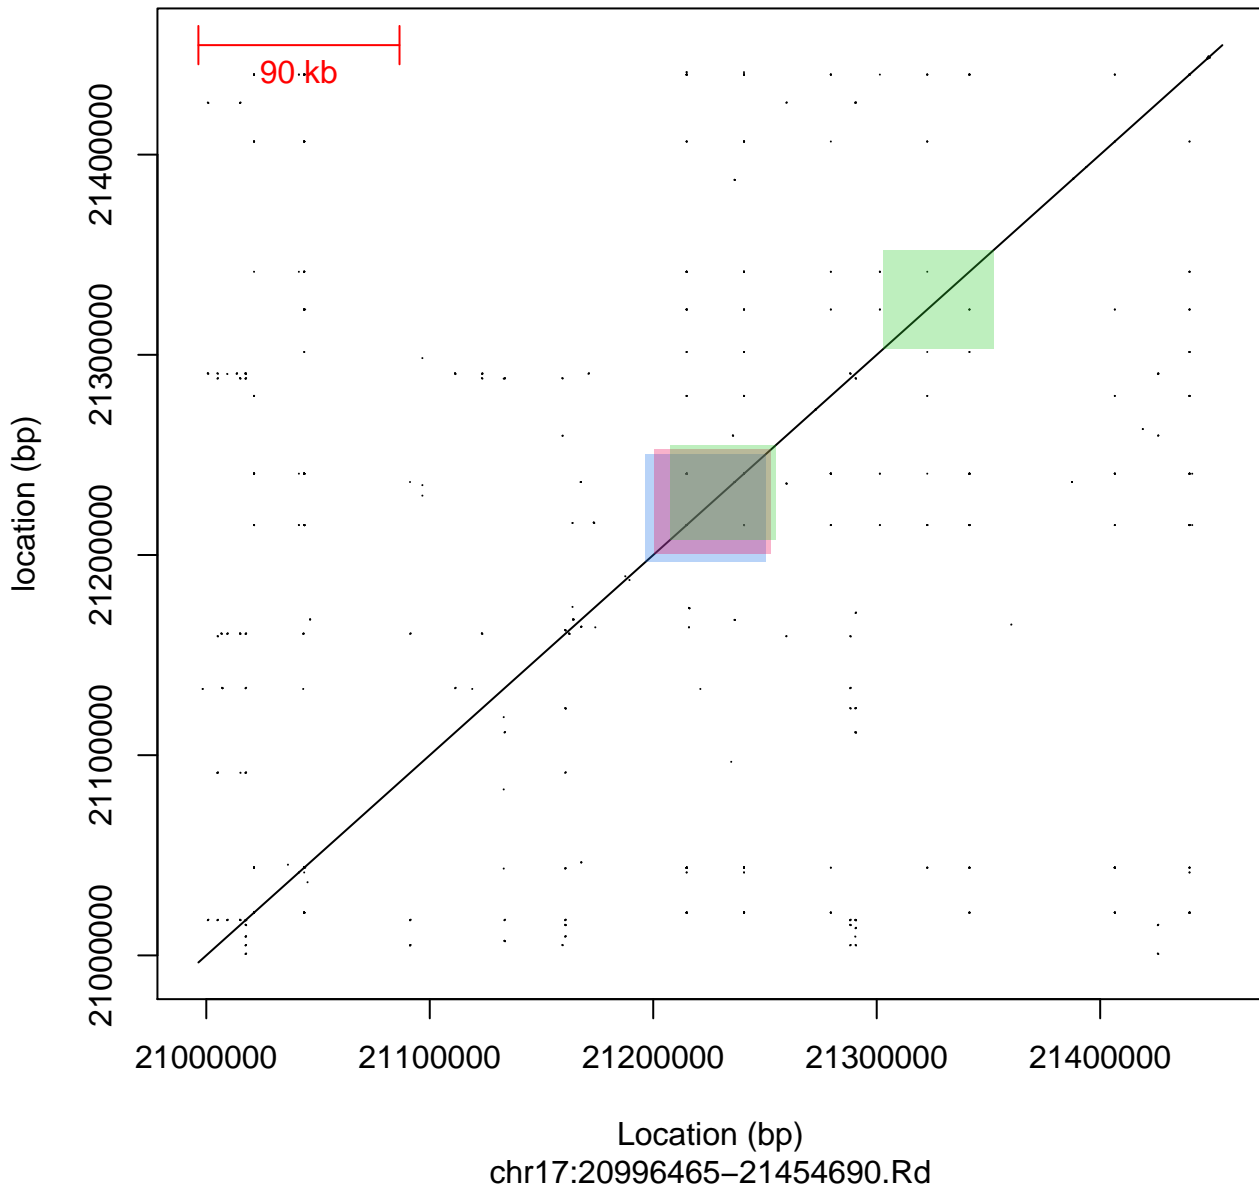

# Dotplot of mBM.17.2, fCB.17.1, ROIno.17.4, ROIno.17.5 on chr17

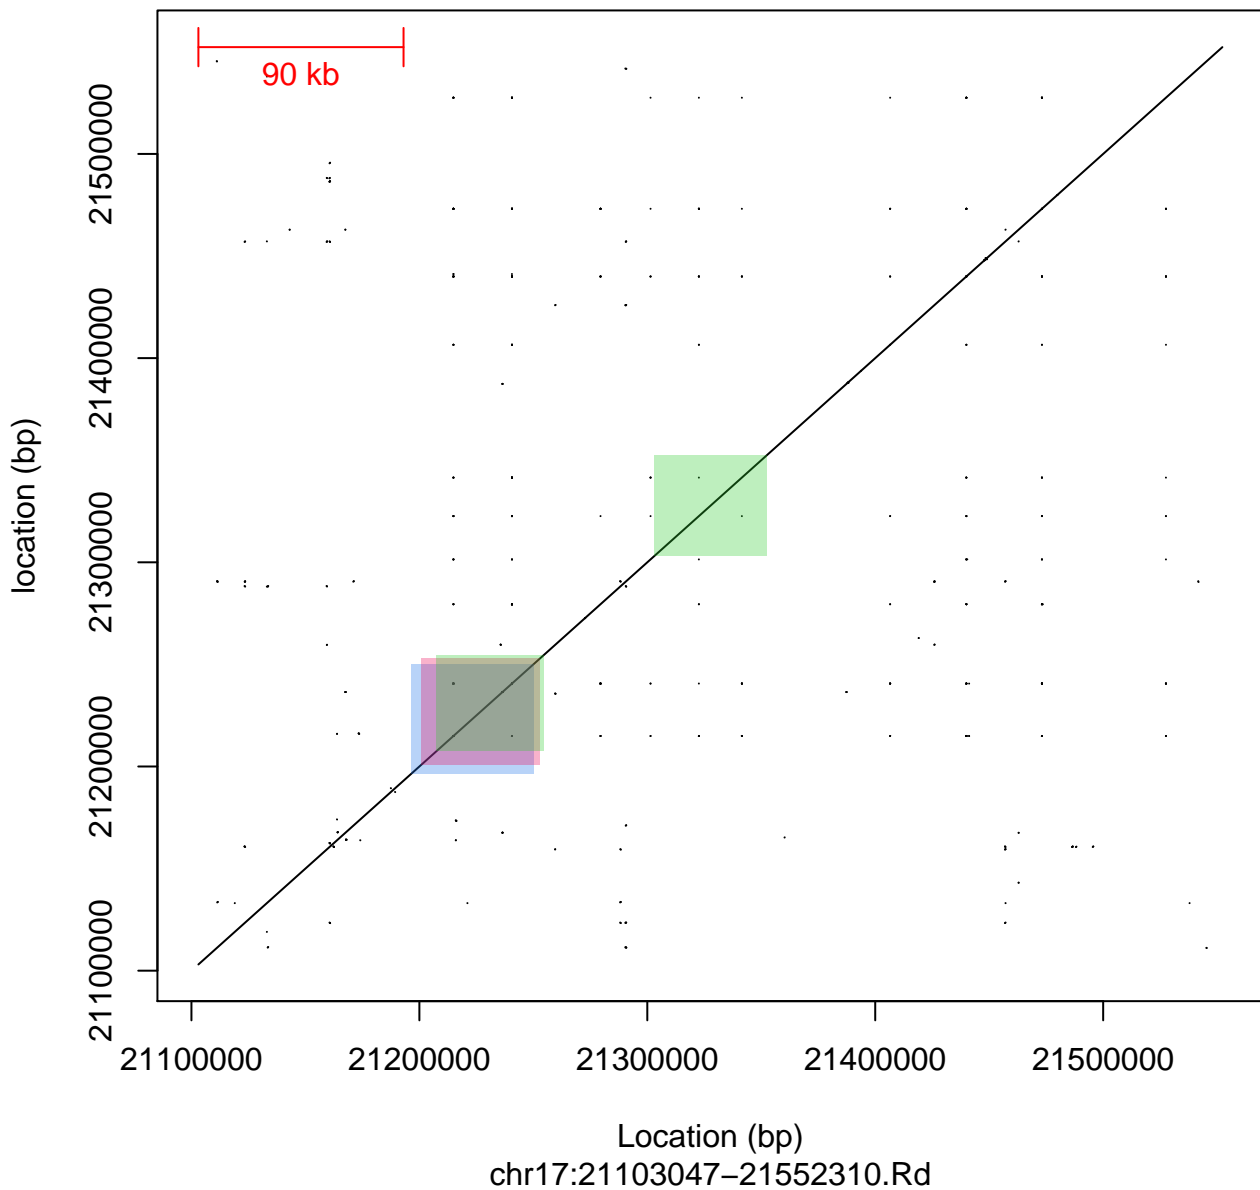

# Dotplot of mBM.17.3, ROIno.17.7 on chr17

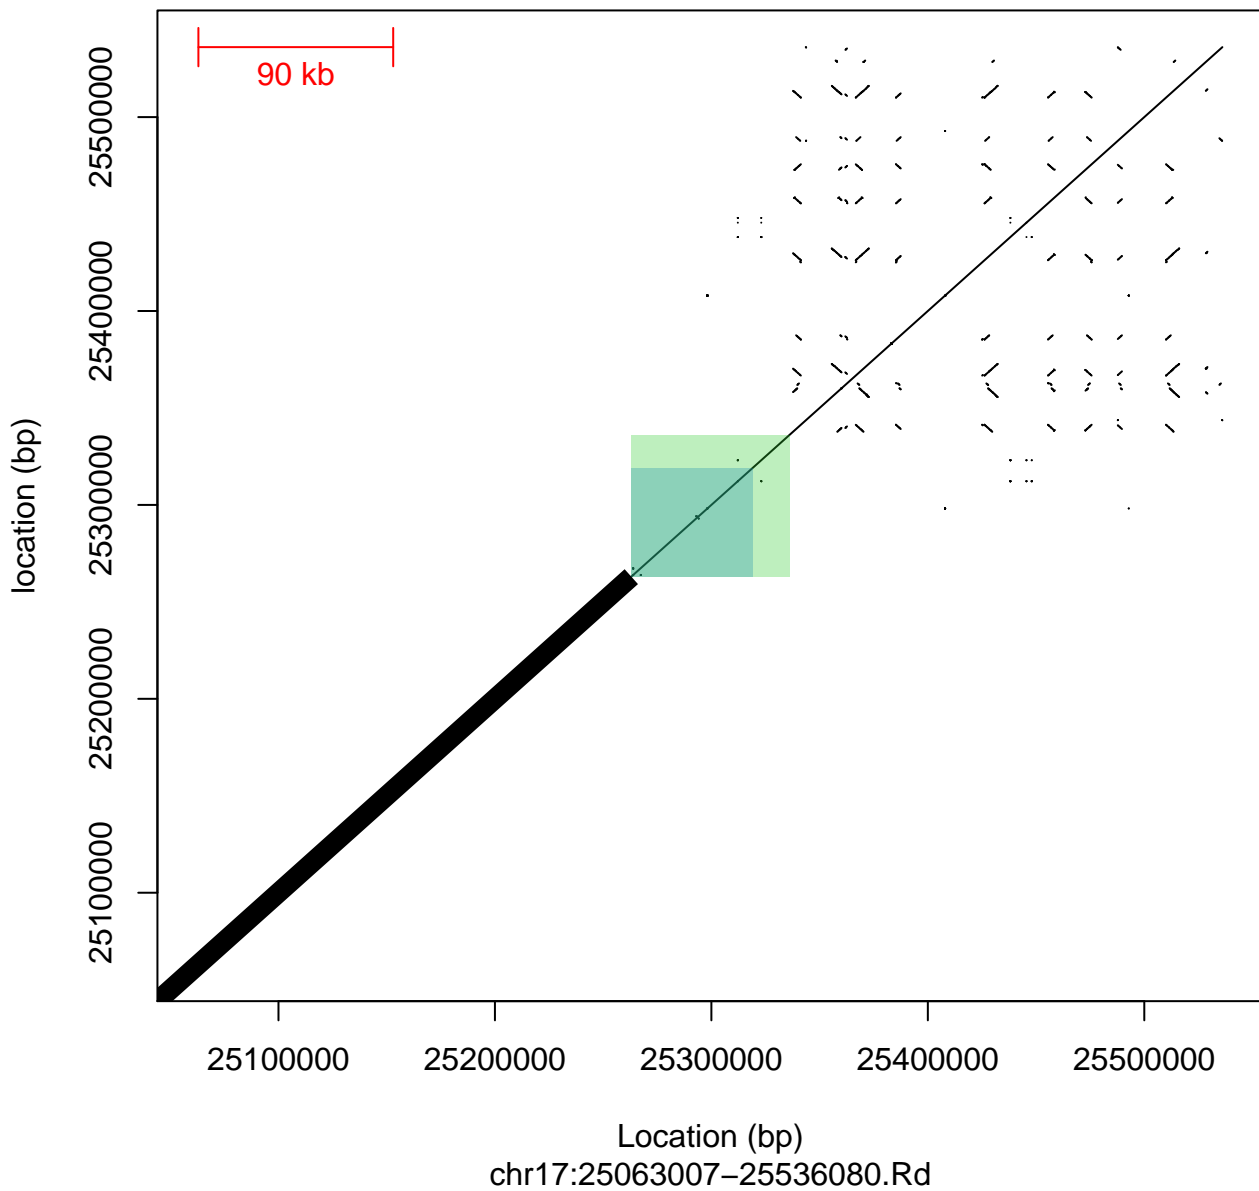

# Dotplot of mBM.17.4, ROIno.17.10 on chr17

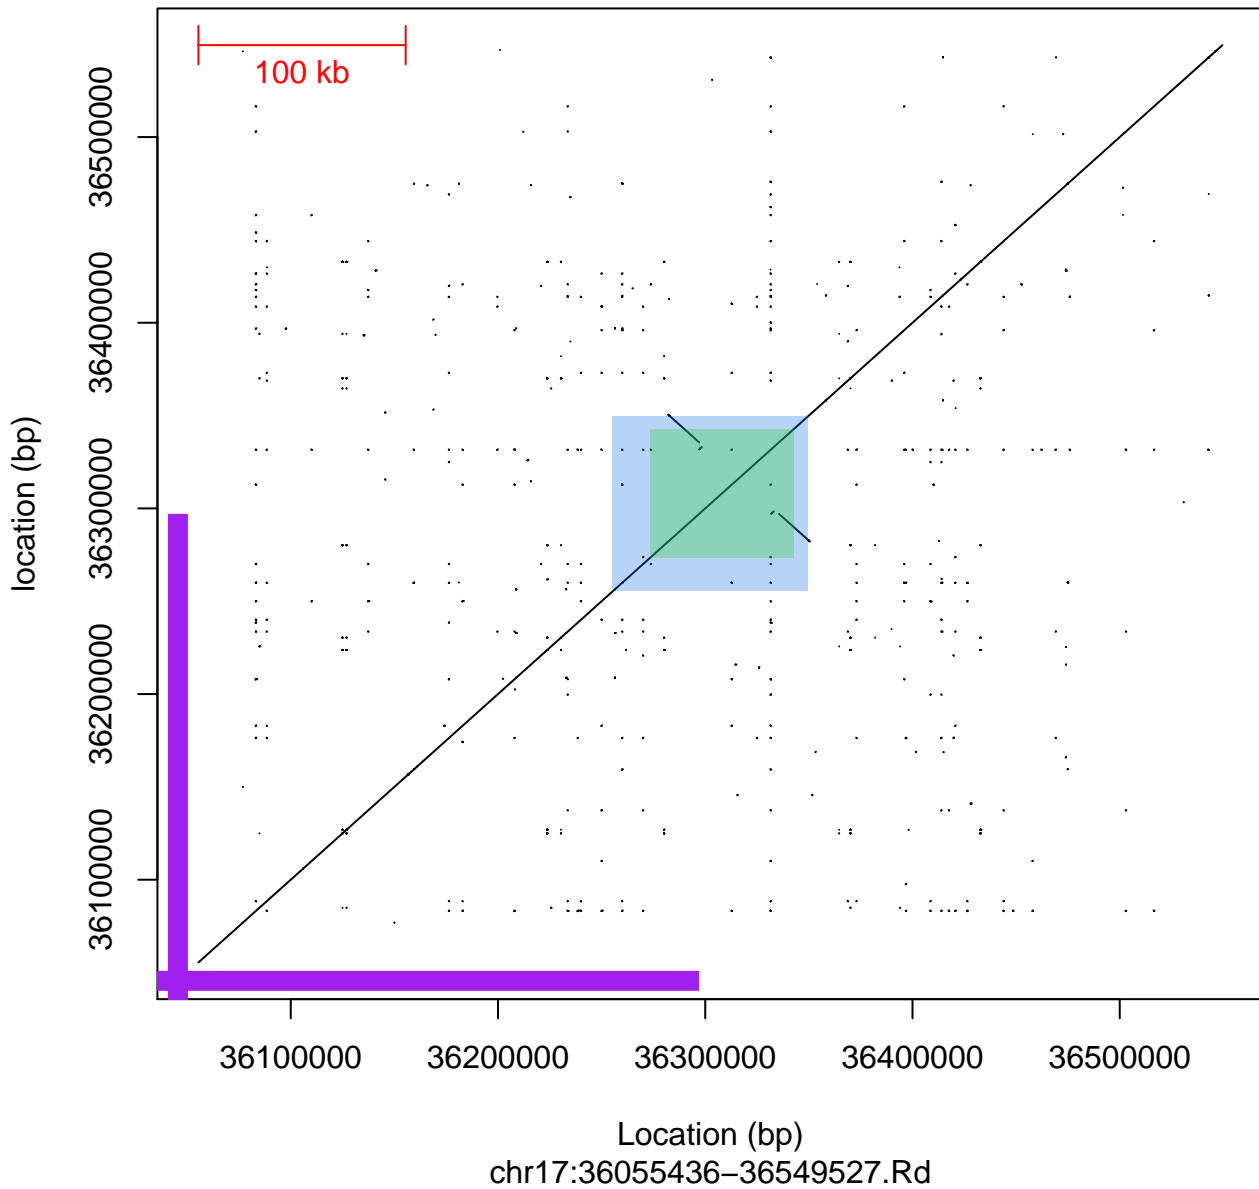

# Dotplot of ROIno.17.16 on chr17

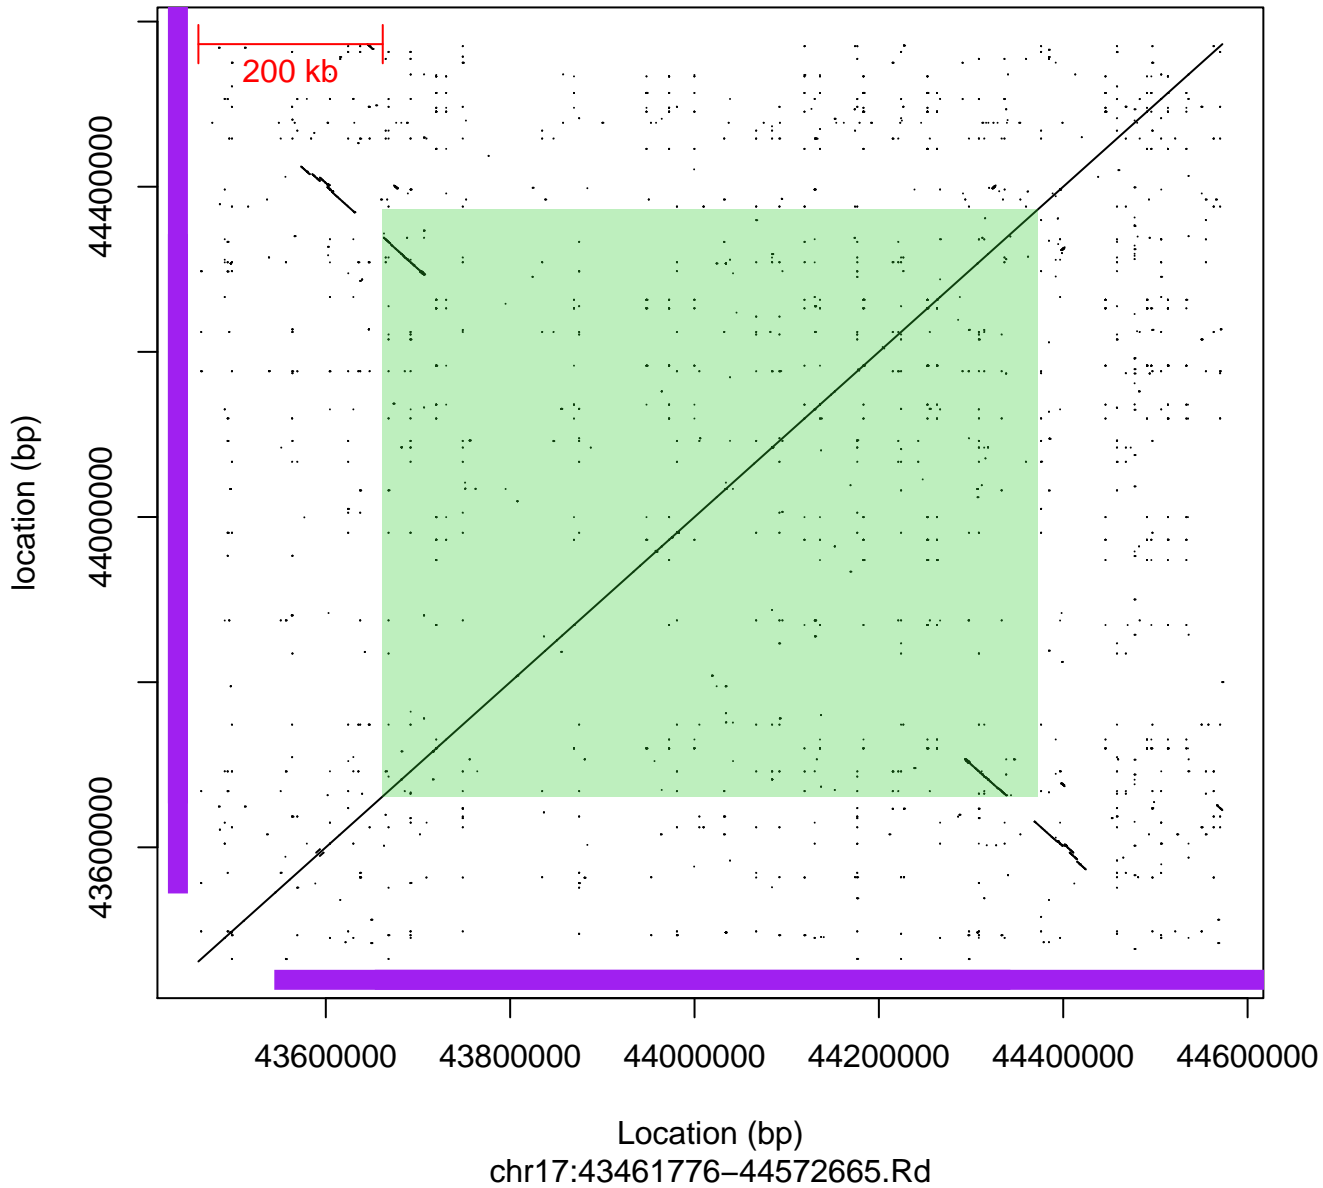

# Dotplot of fCB.19.1, ROIno.19.1 on chr19

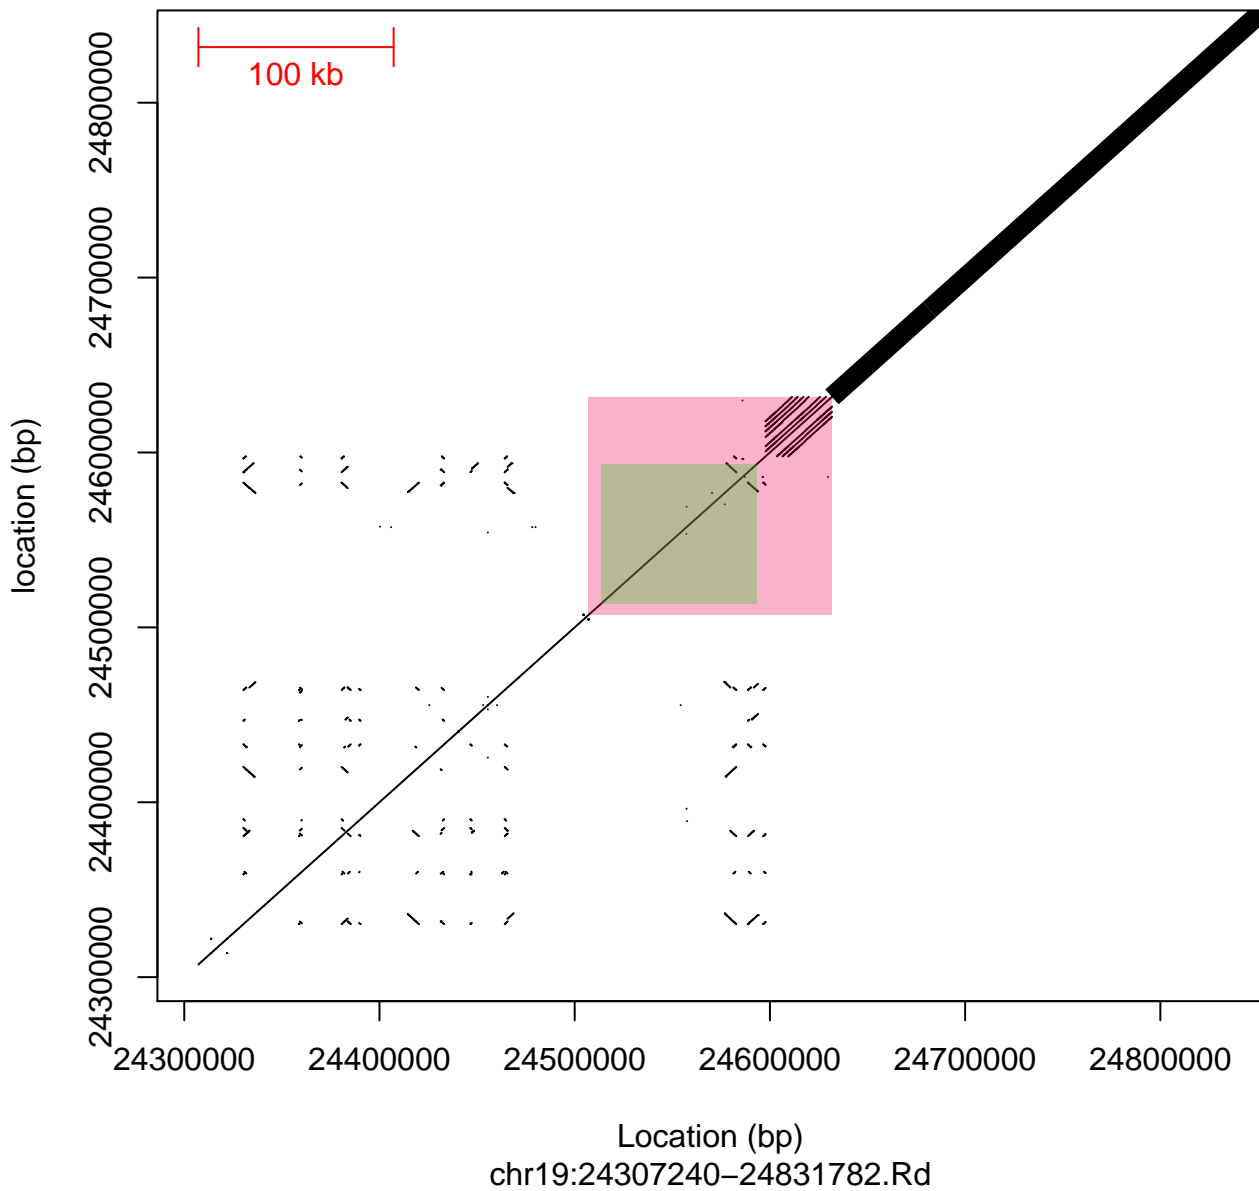



# Dotplot of ROI No.19.3 on chr19

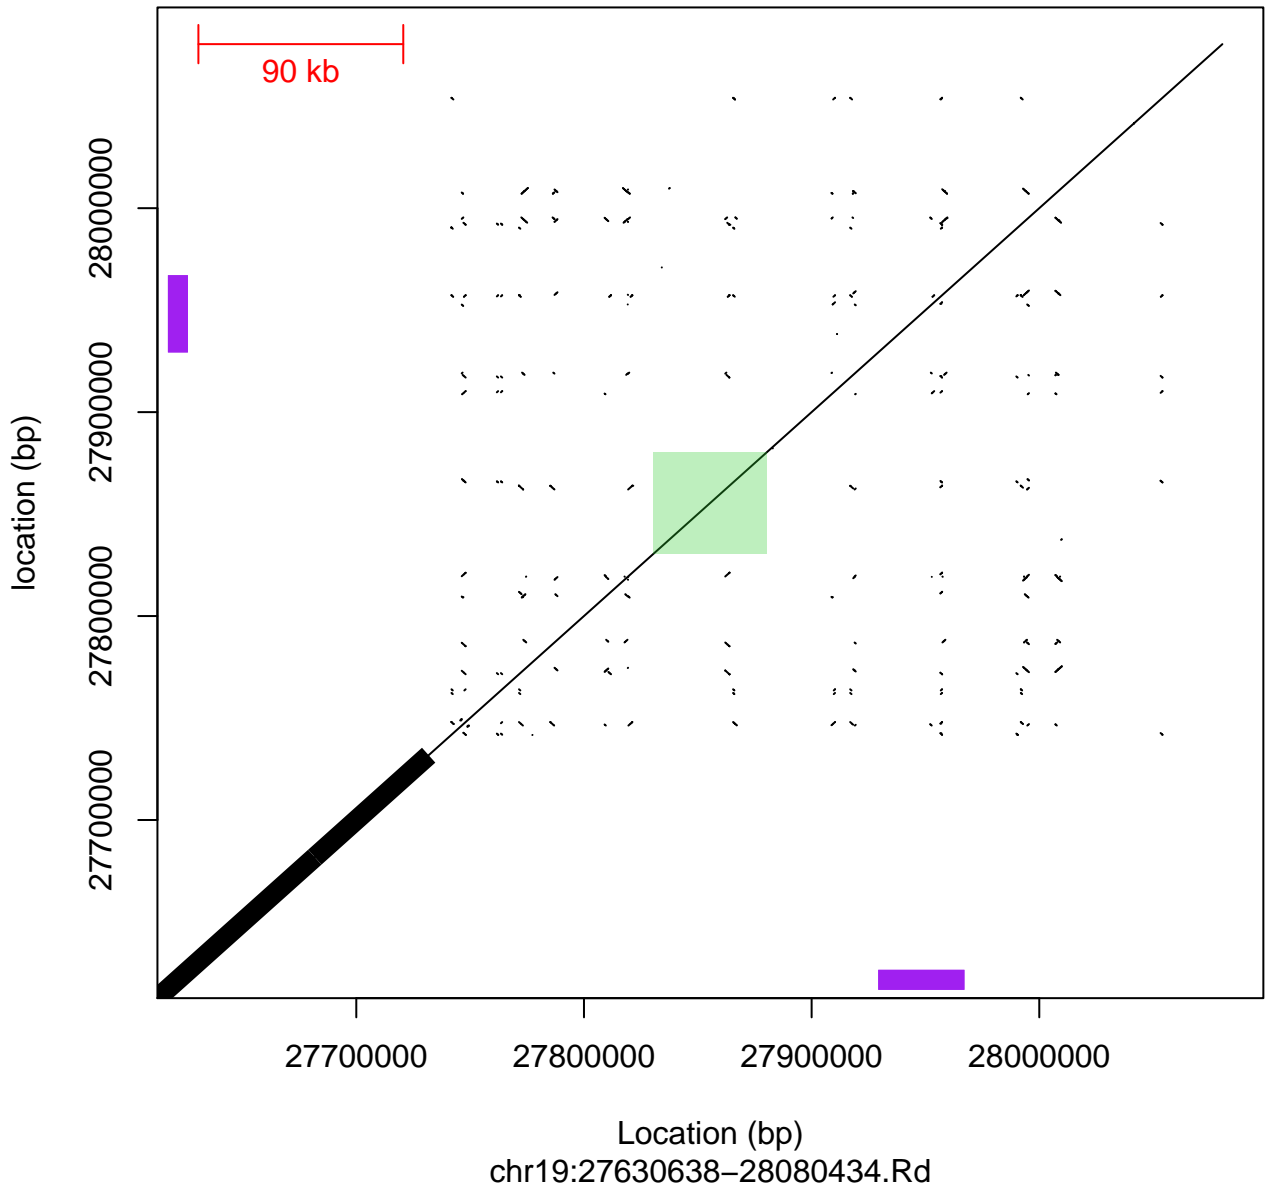

# Dotplot of ROI No.20.1 on chr20

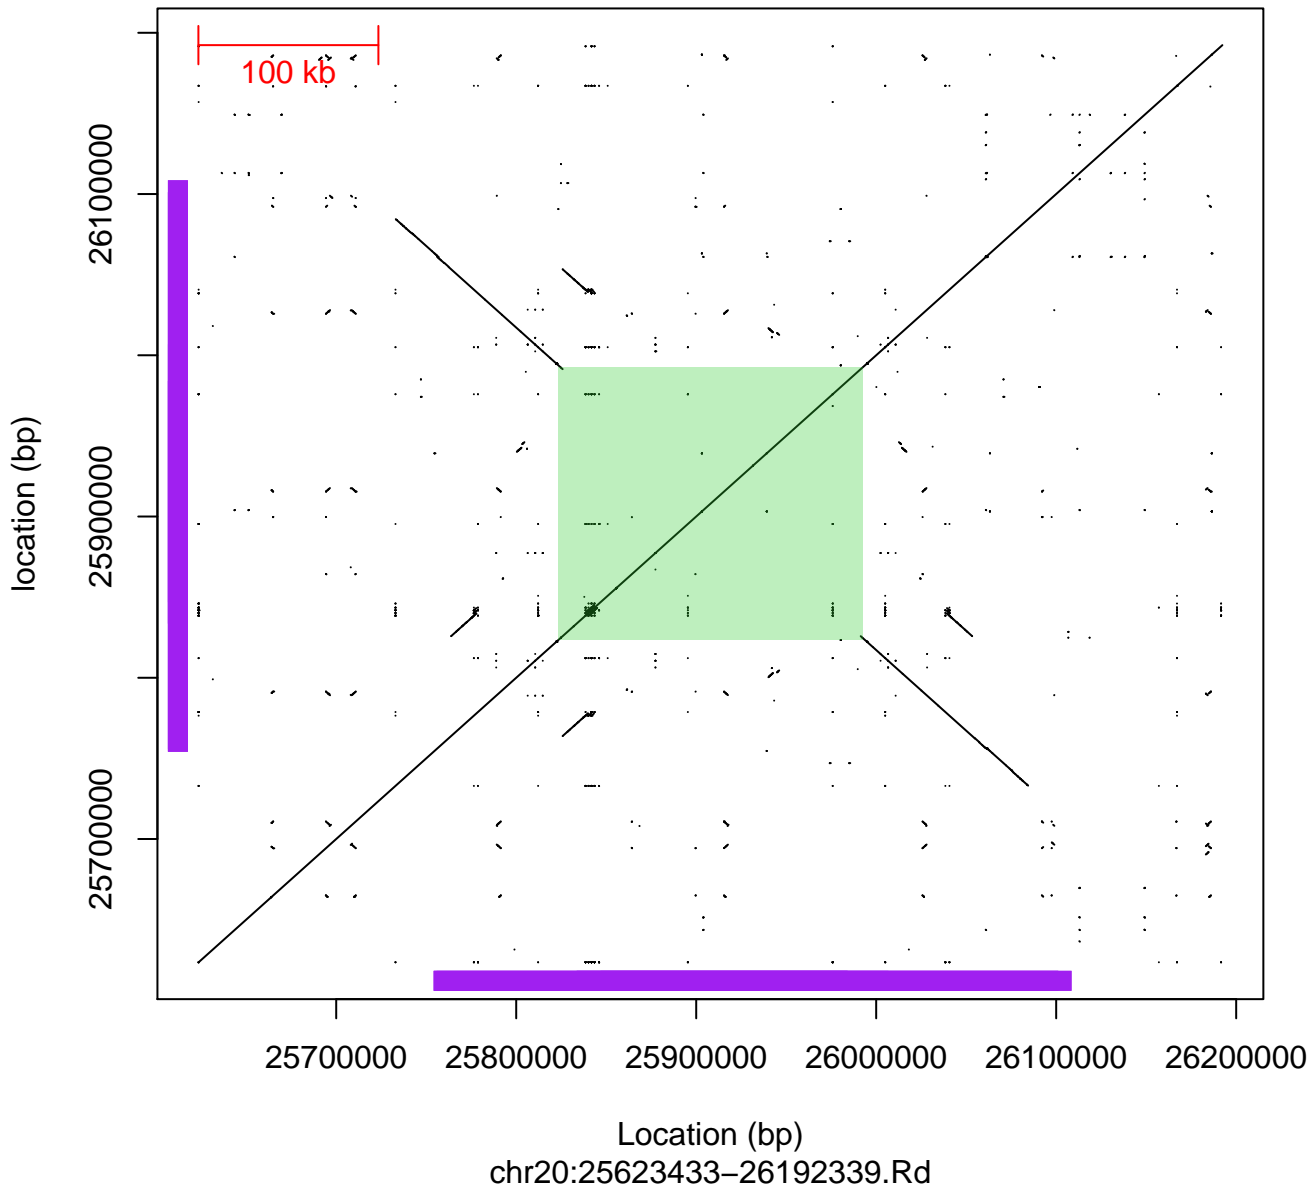

# Dotplot of ROI No.20.2 on chr20

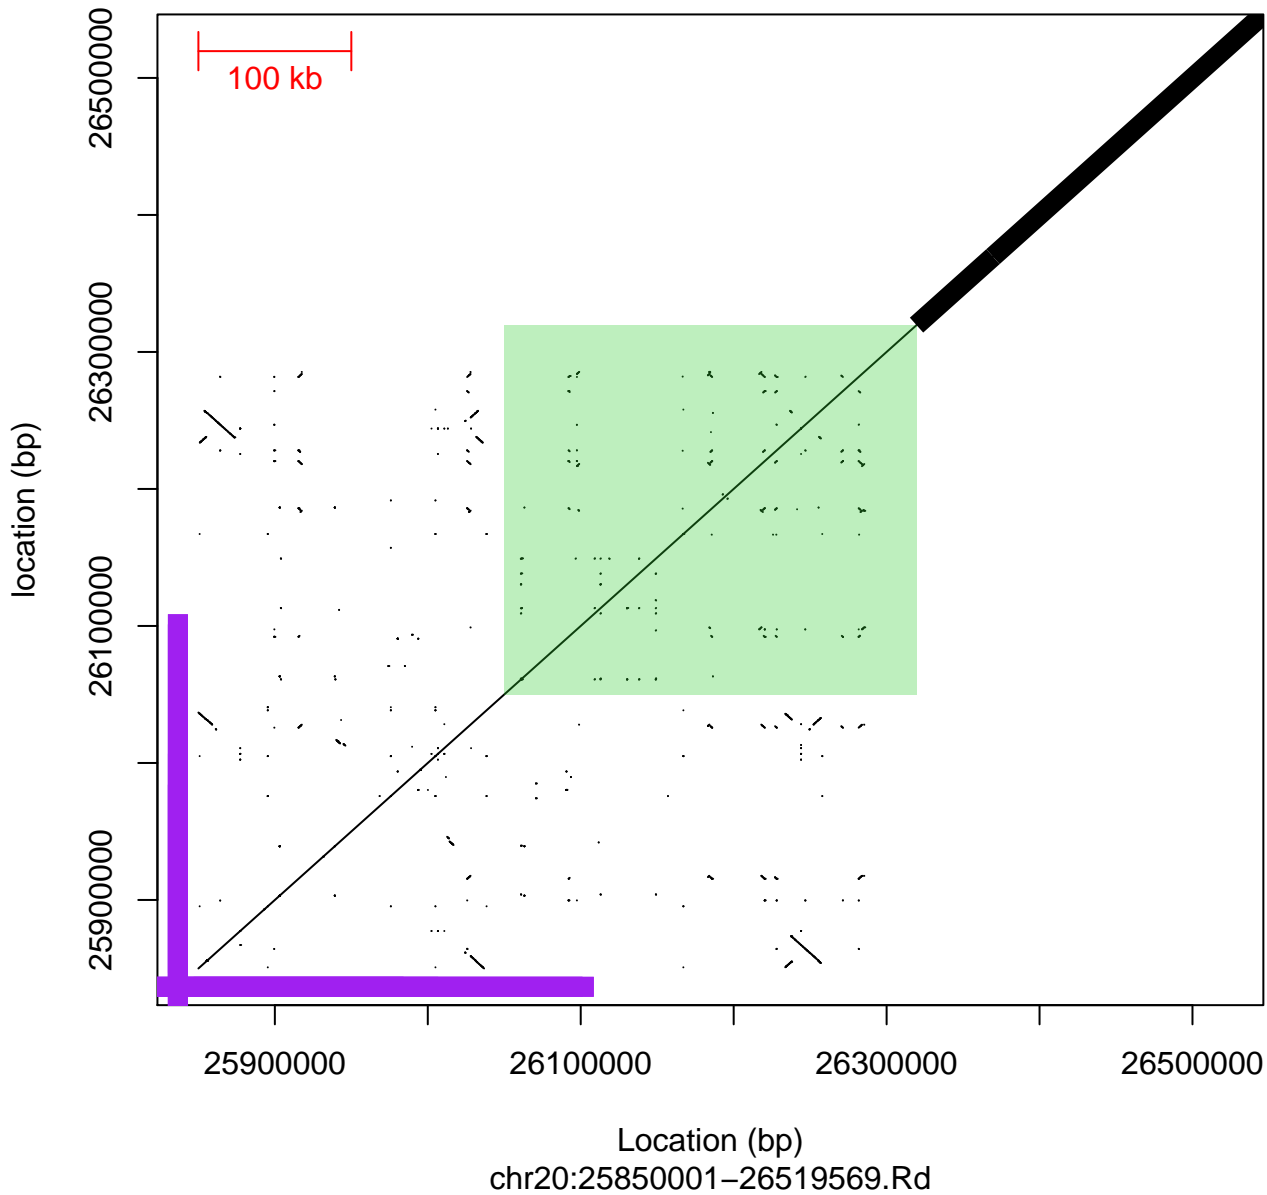

# Dotplot of mBM.20.1, fCB.20.1 on chr20

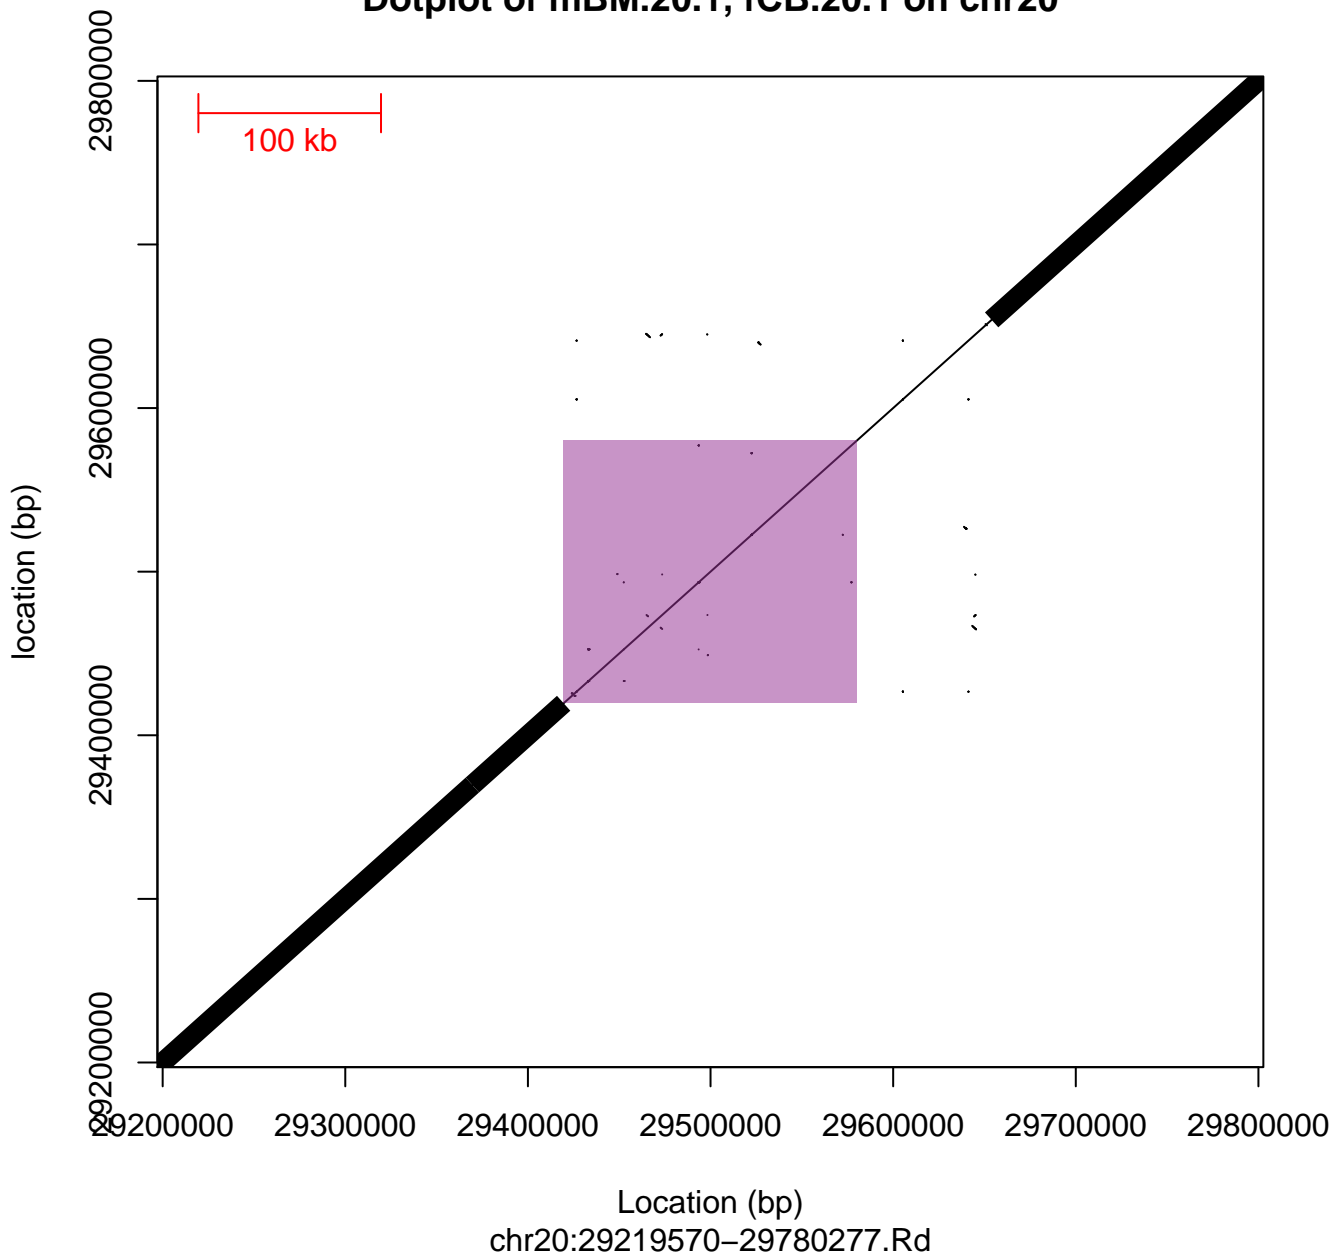

# Dotplot of mBM.21.1, ROIno.21.2 on chr21

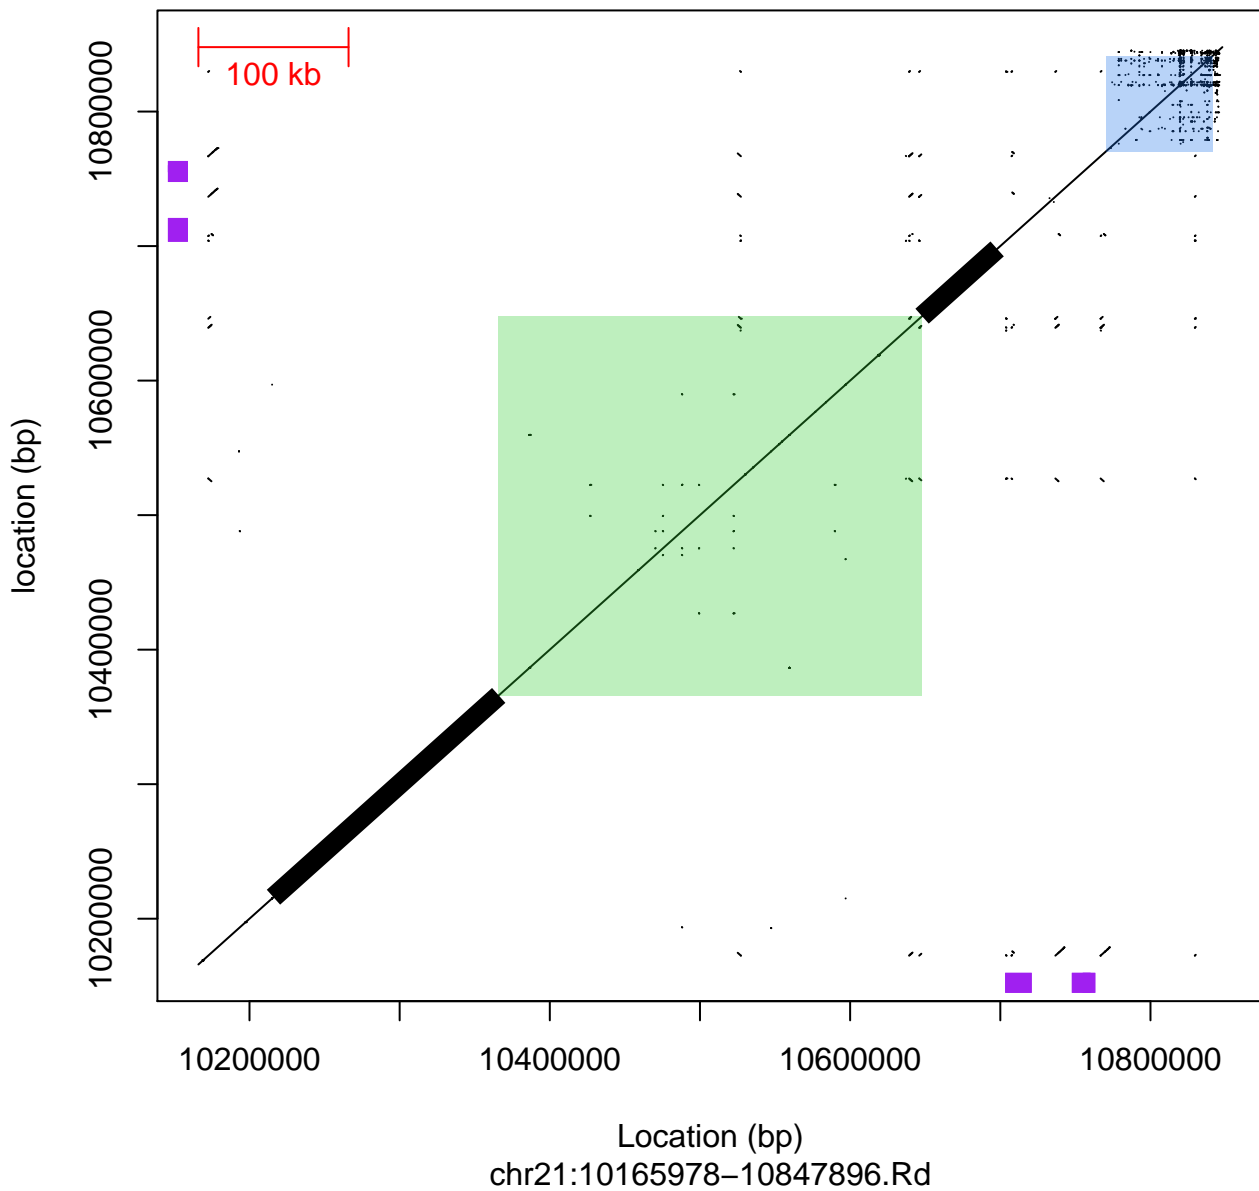

# Dotplot of mBM.21.1, fCB.21.1, ROIno.21.4 on chr21

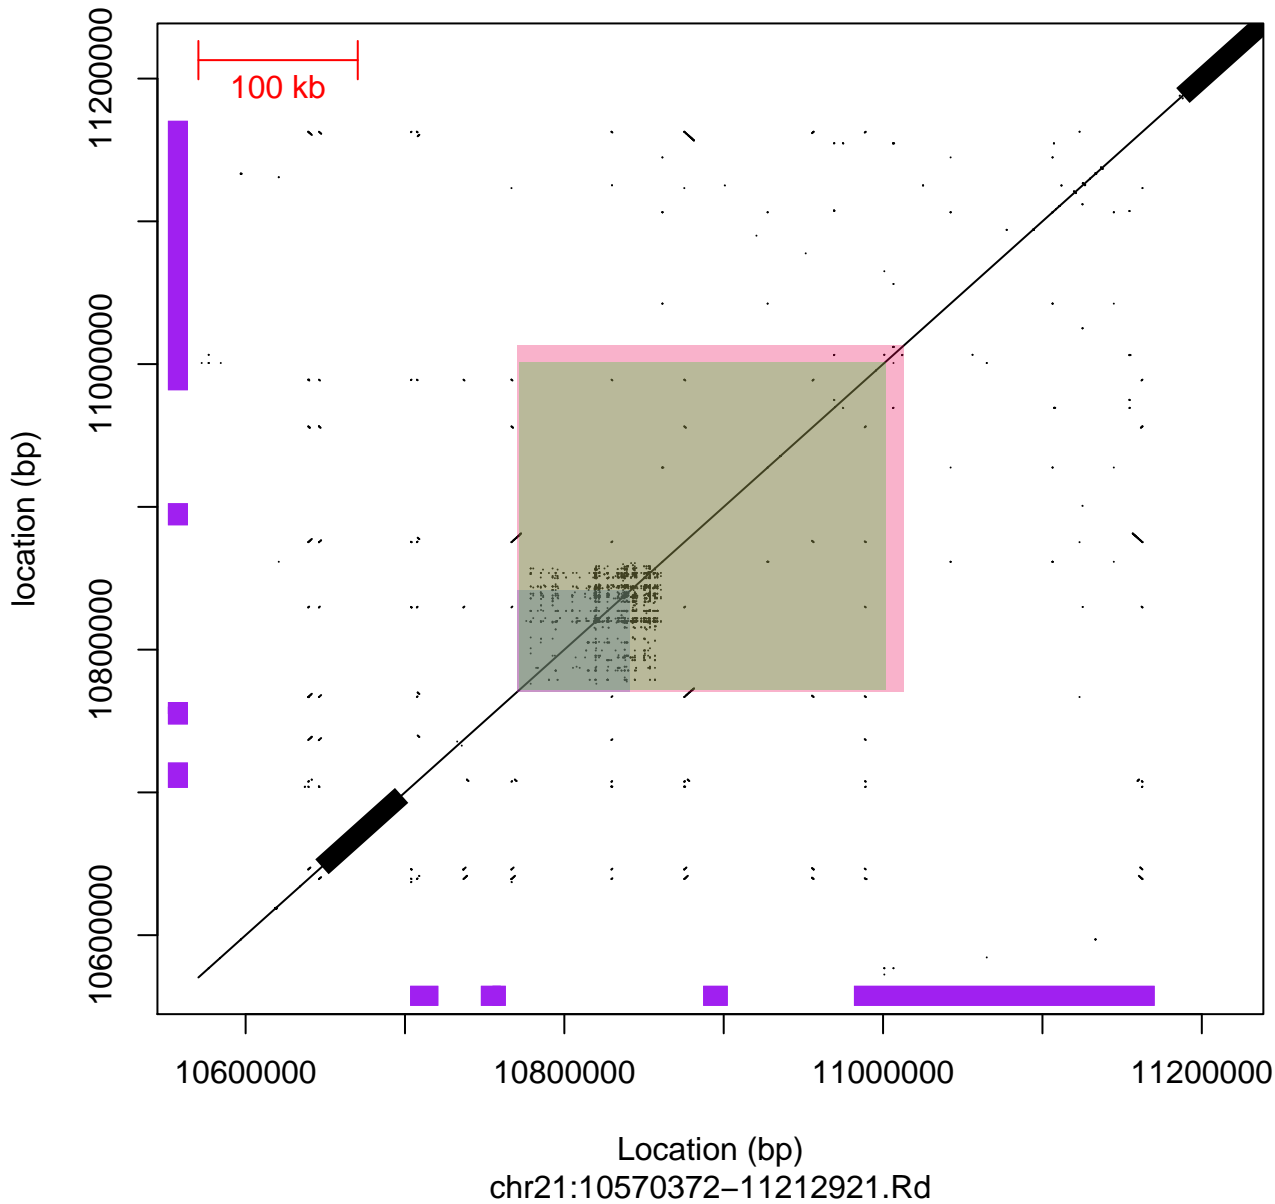

# Dotplot of mBM.21.2, ROIno.21.6 on chr21

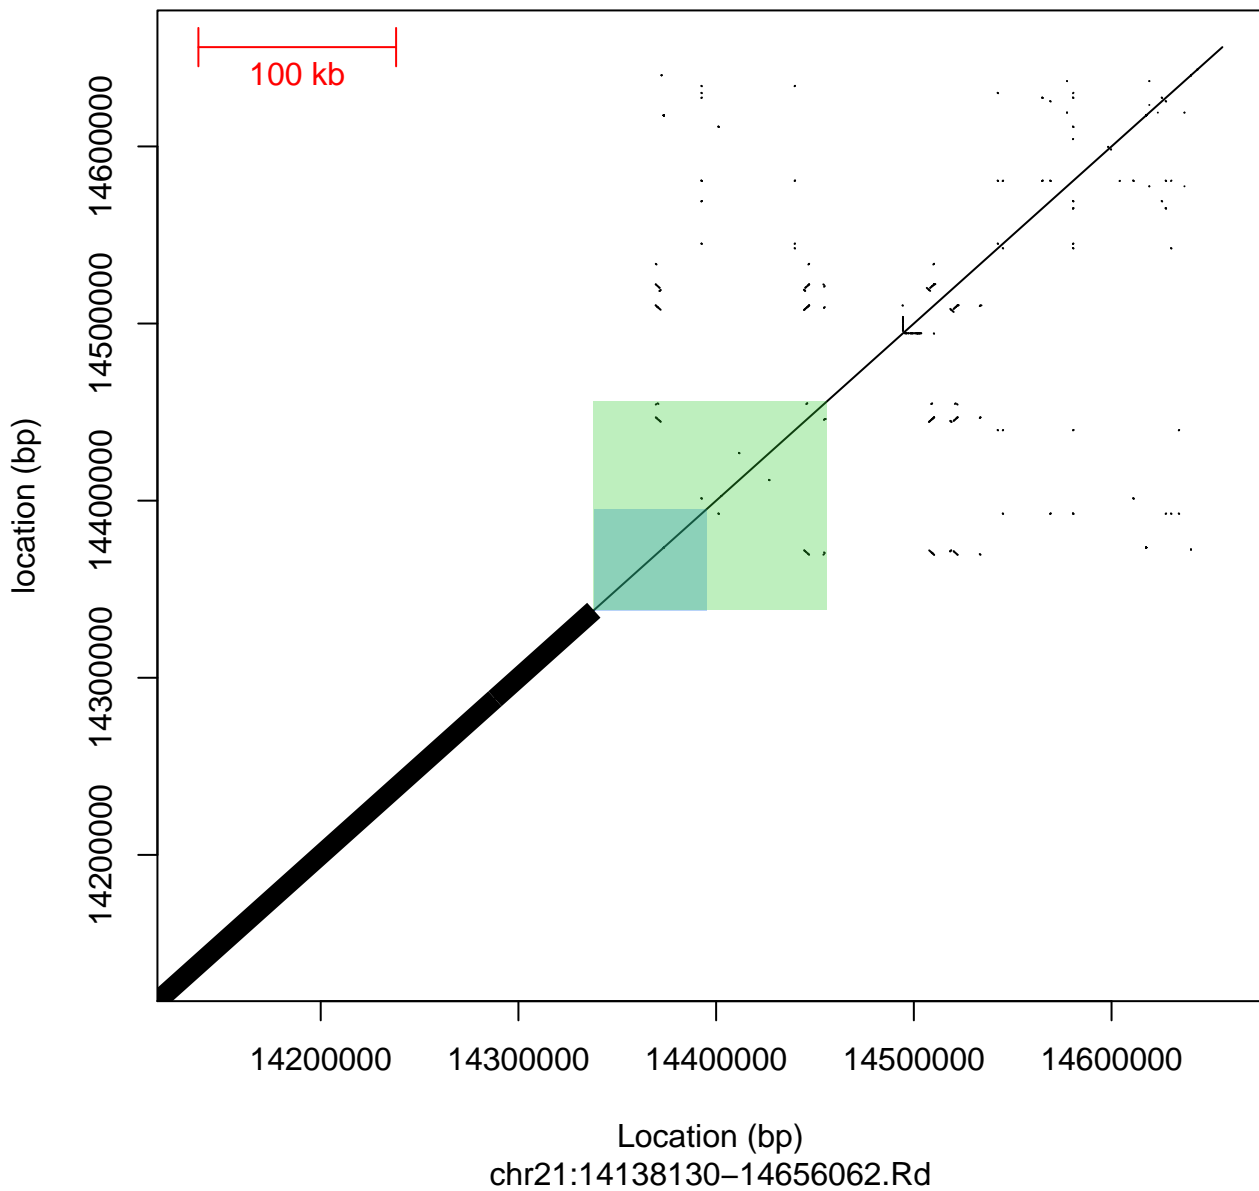

# Dotplot of ROI No.21.7 on chr21

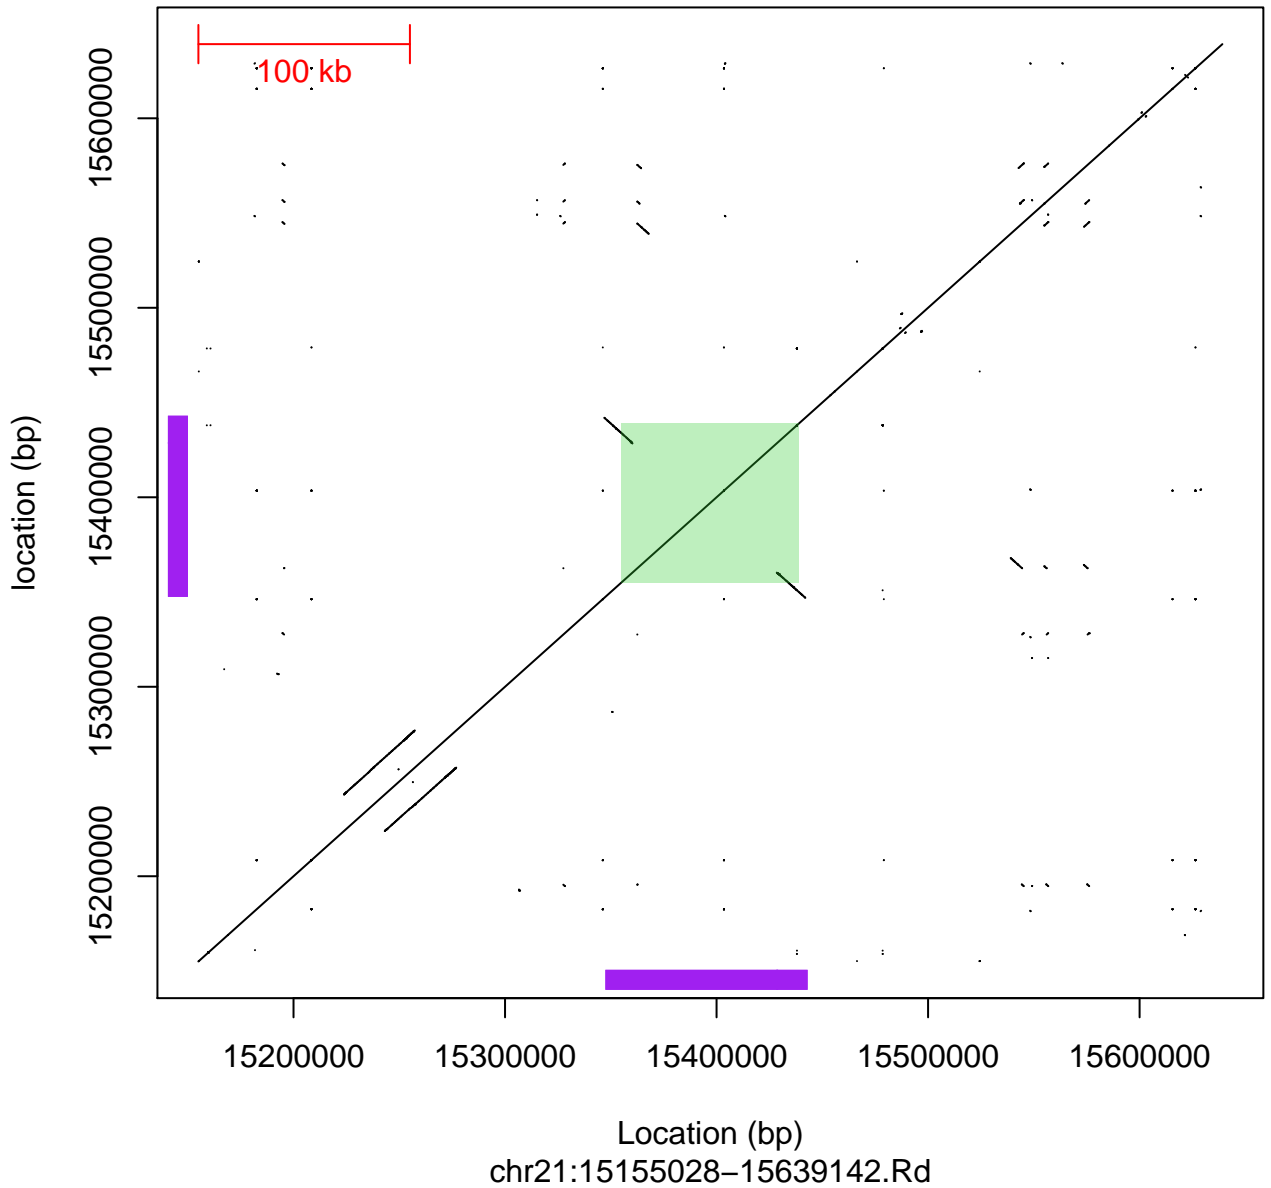



# Dotplot of mBM.22.1, fCB.22.1, ROIno.22.1 on chr22

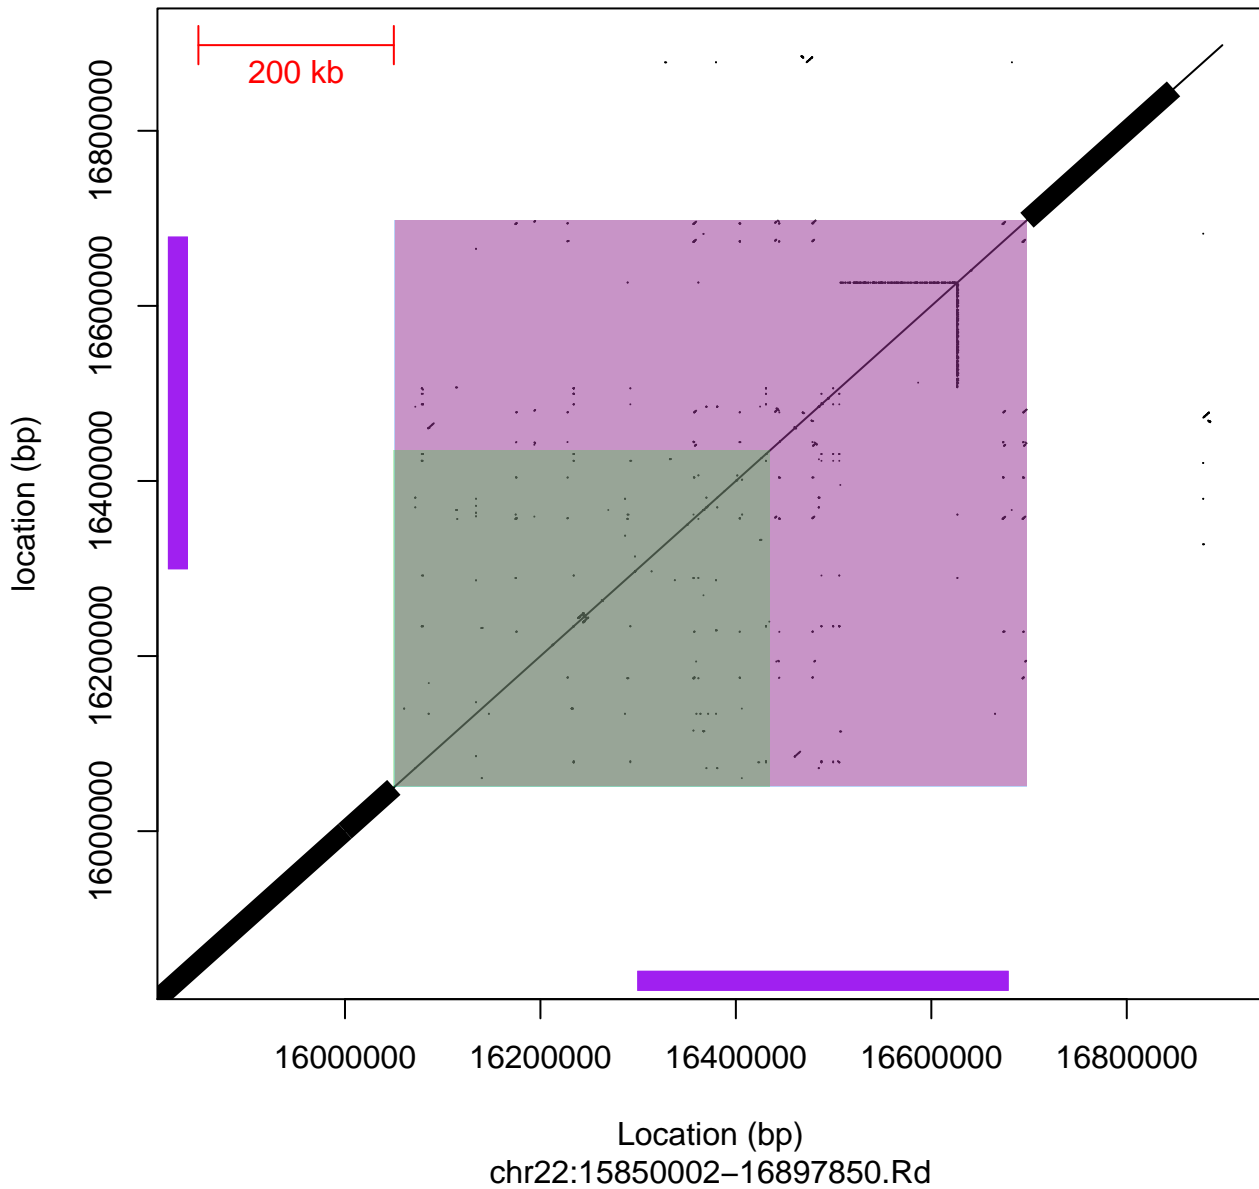

# Dotplot of ROI No.22.3 on chr22

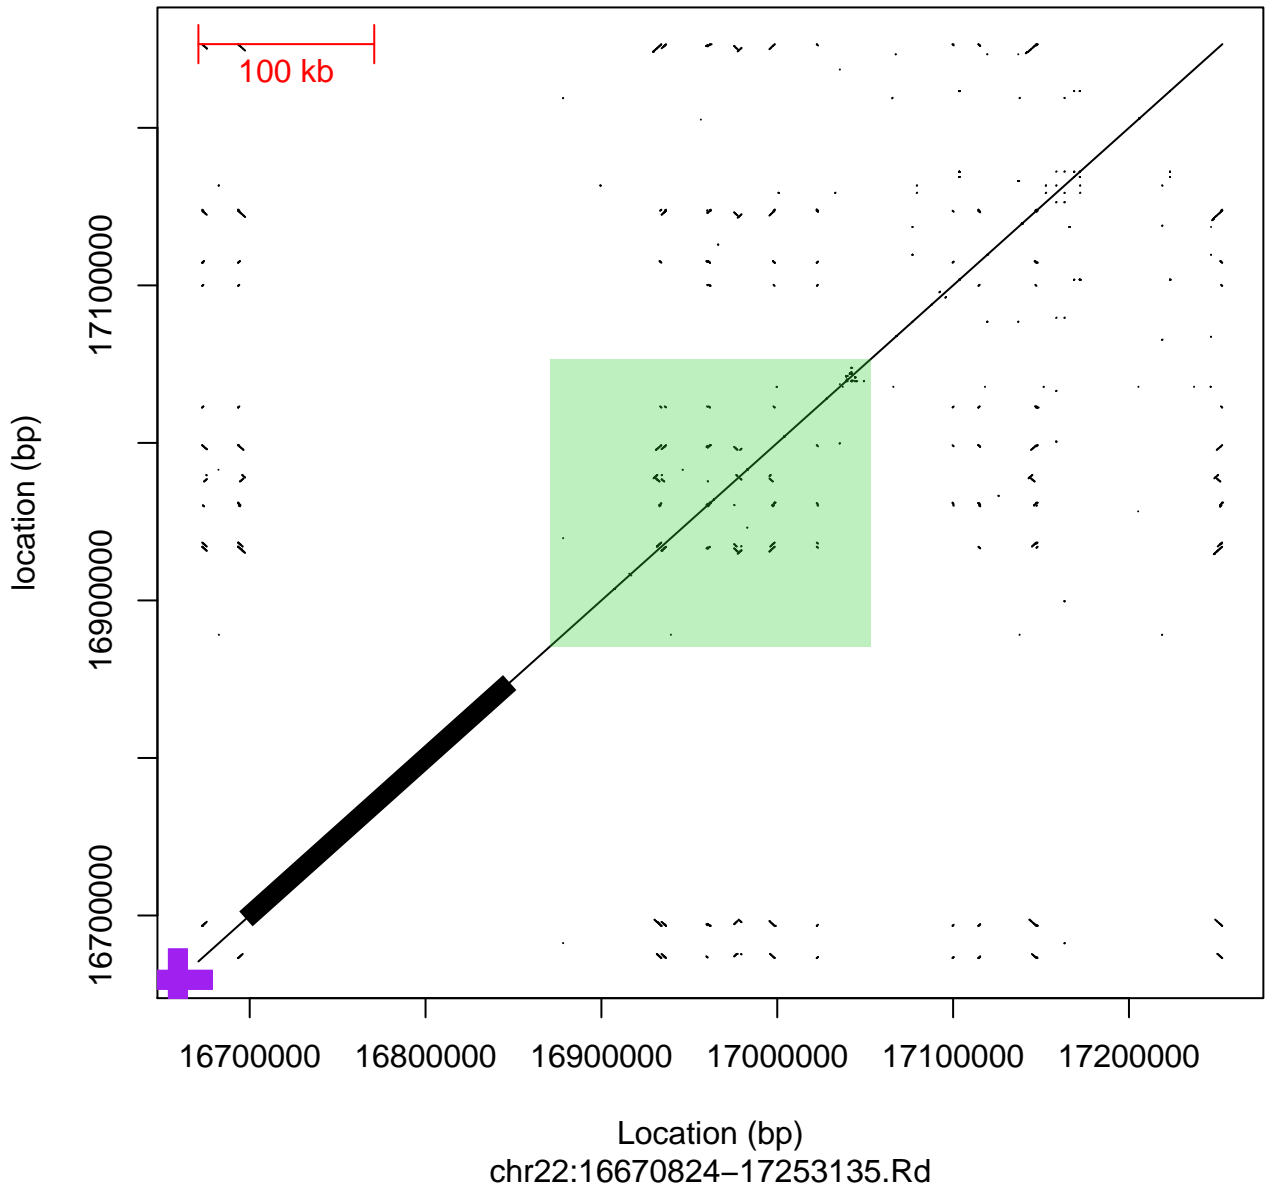

# Dotplot of fCB.22.2, ROIno.22.4 on chr22

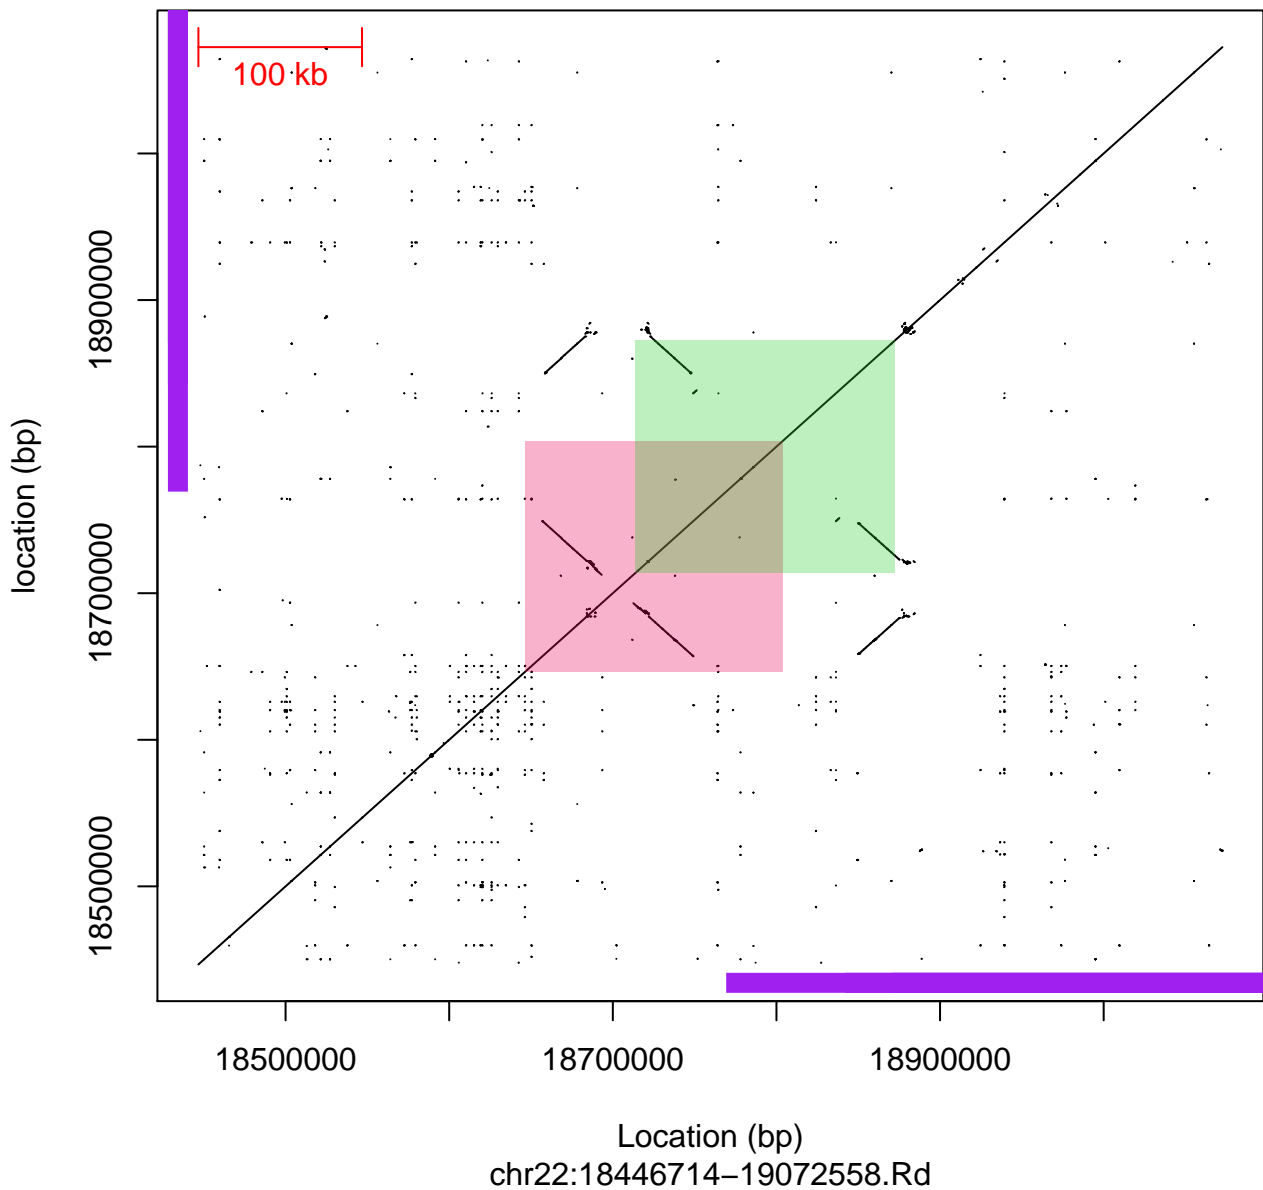

# Dotplot of fCB.22.3, ROIno.22.5 on chr22

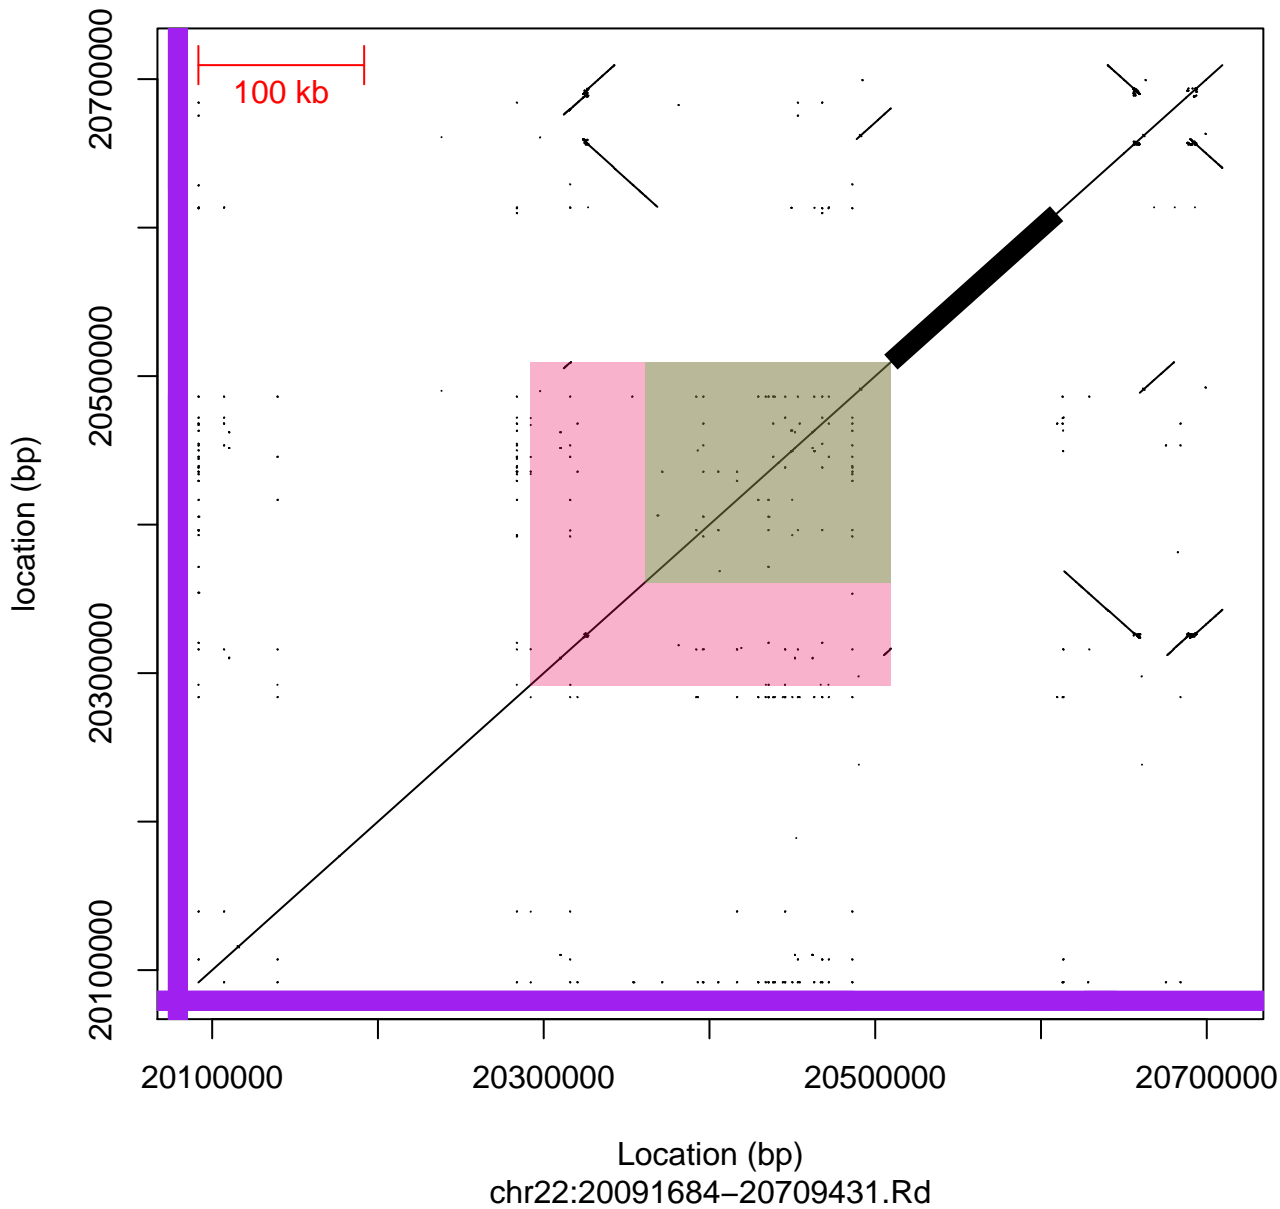

# Dotplot of ROIno.22.7, ROIno.22.8 on chr22

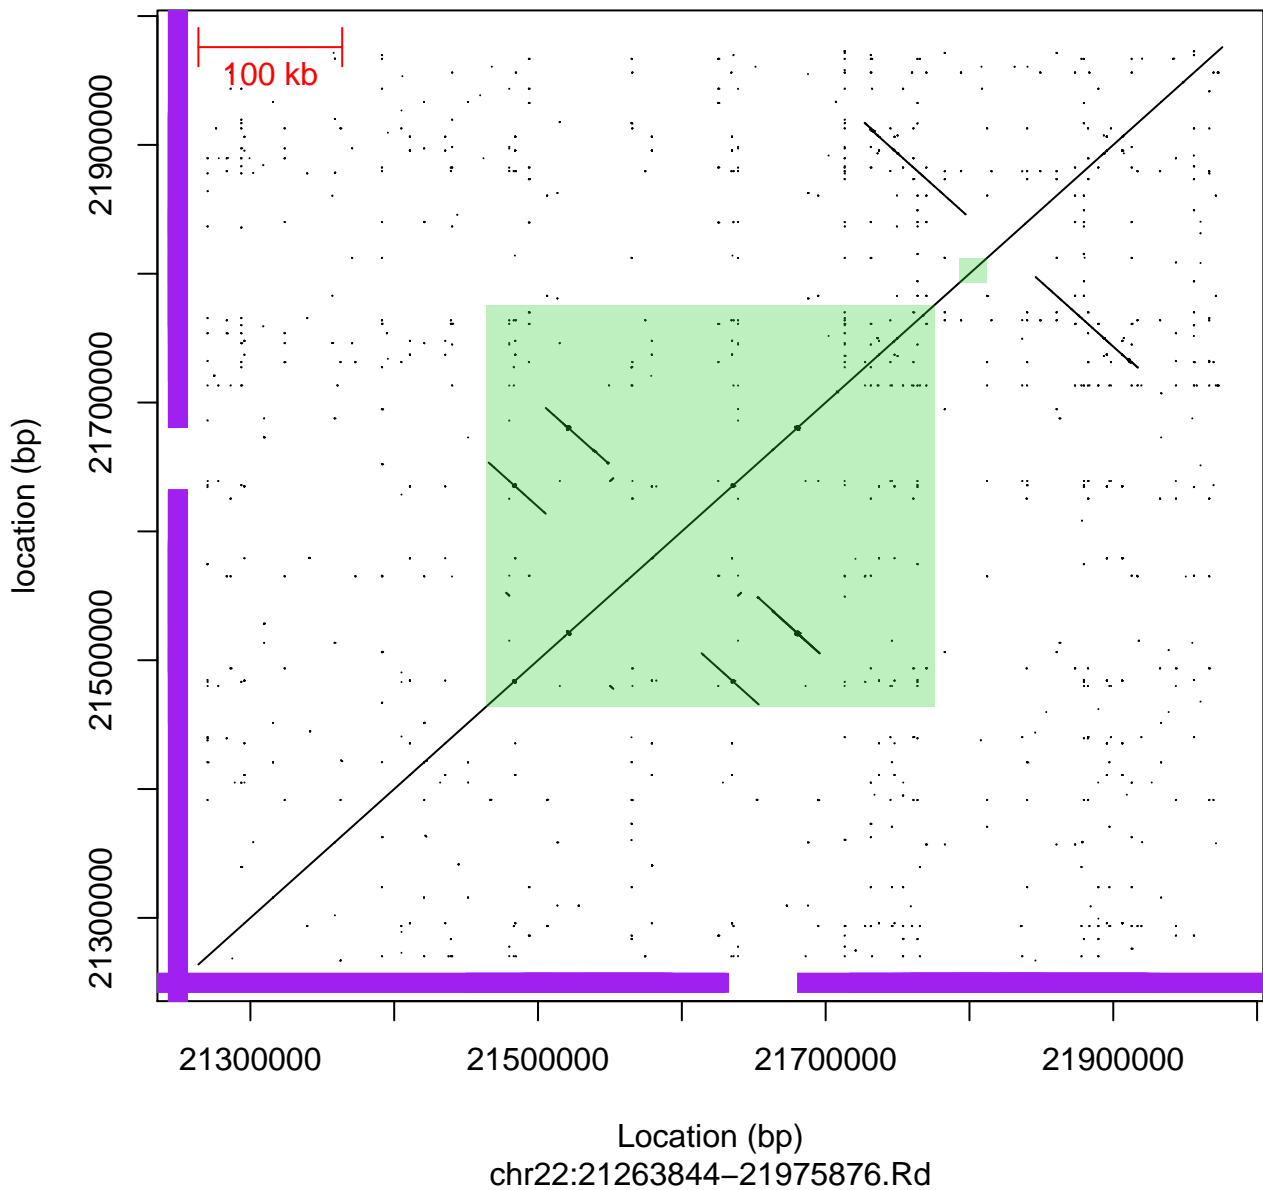

# Dotplot of ROI No.22.8 on chr22

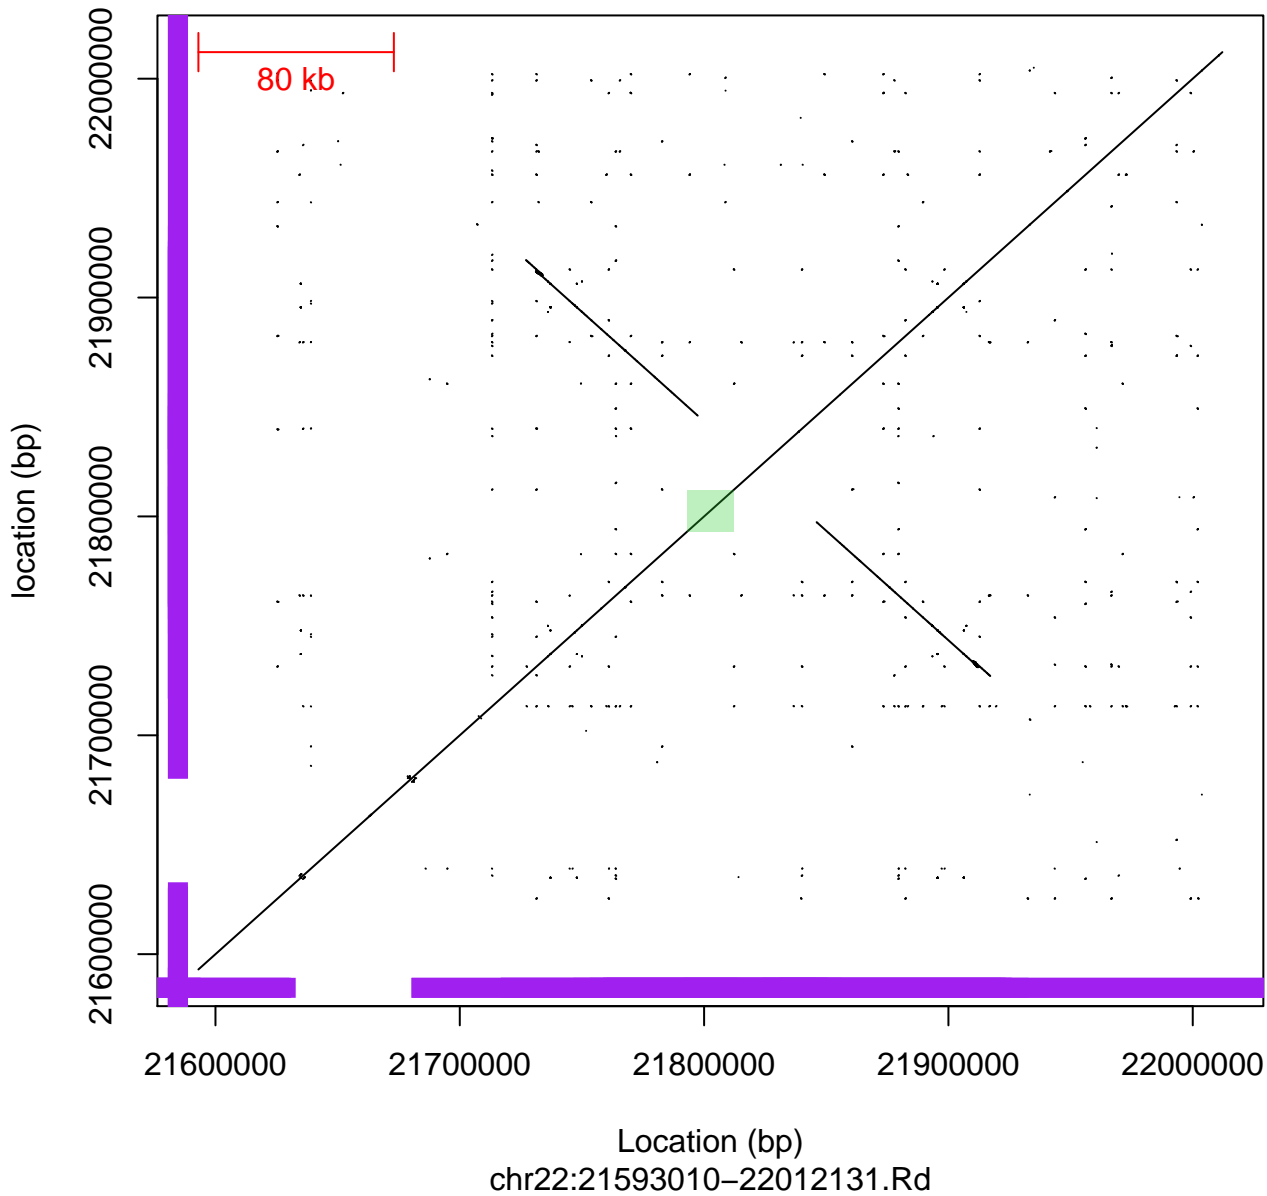

# Dotplot of ROIno.X.4 on chrX

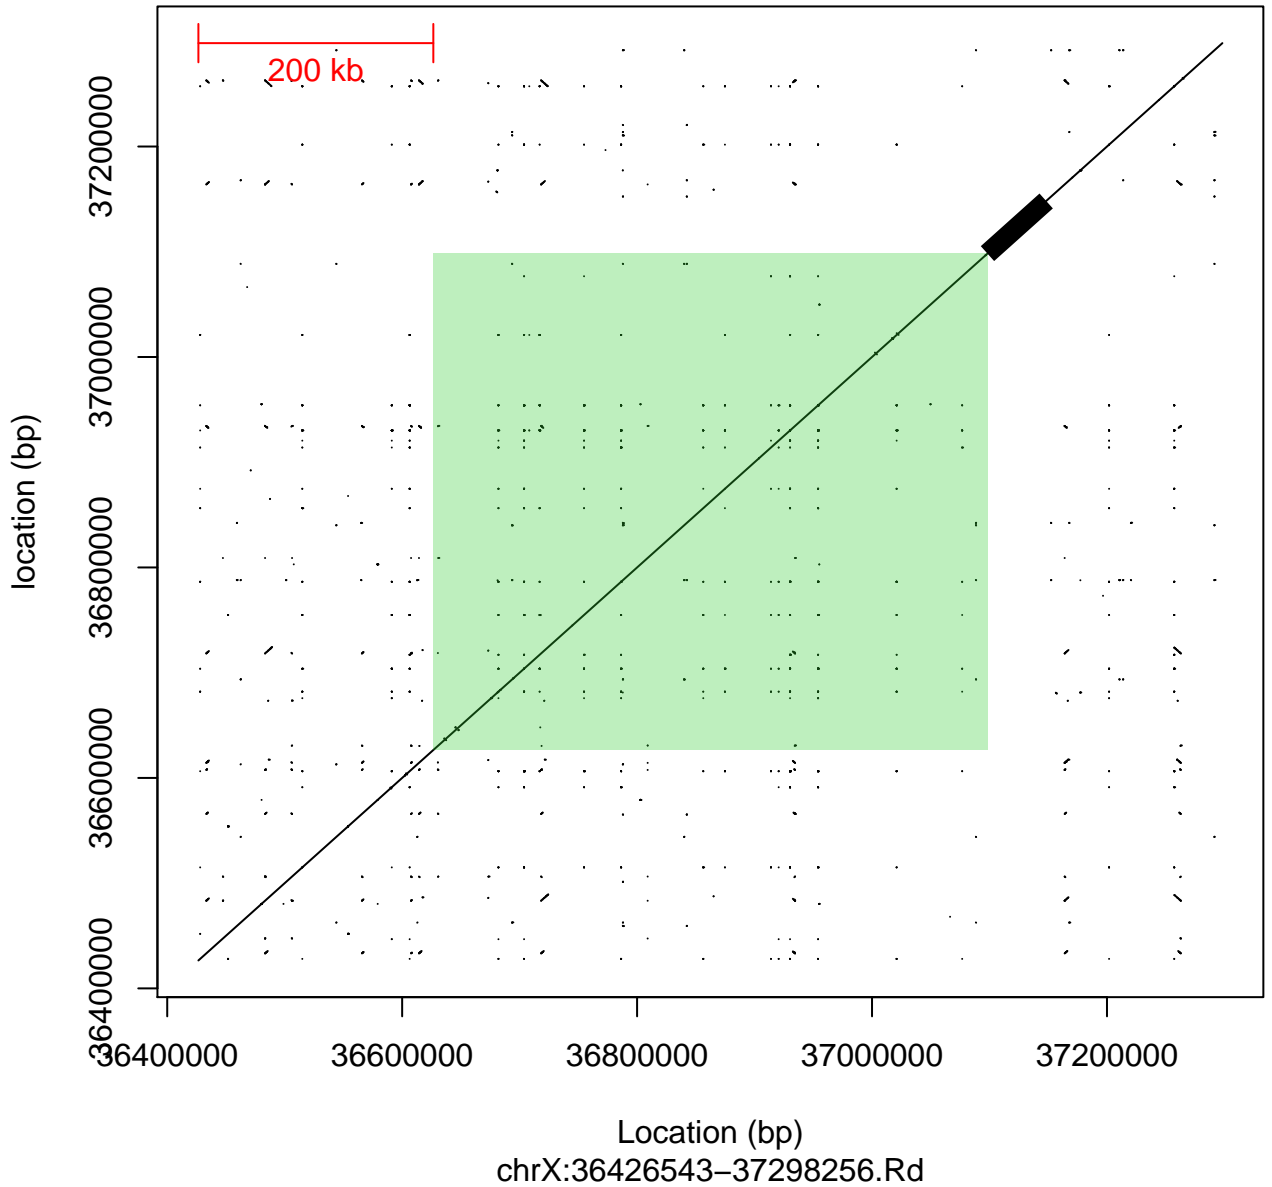

# Dotplot of ROIno.X.12 on chrX

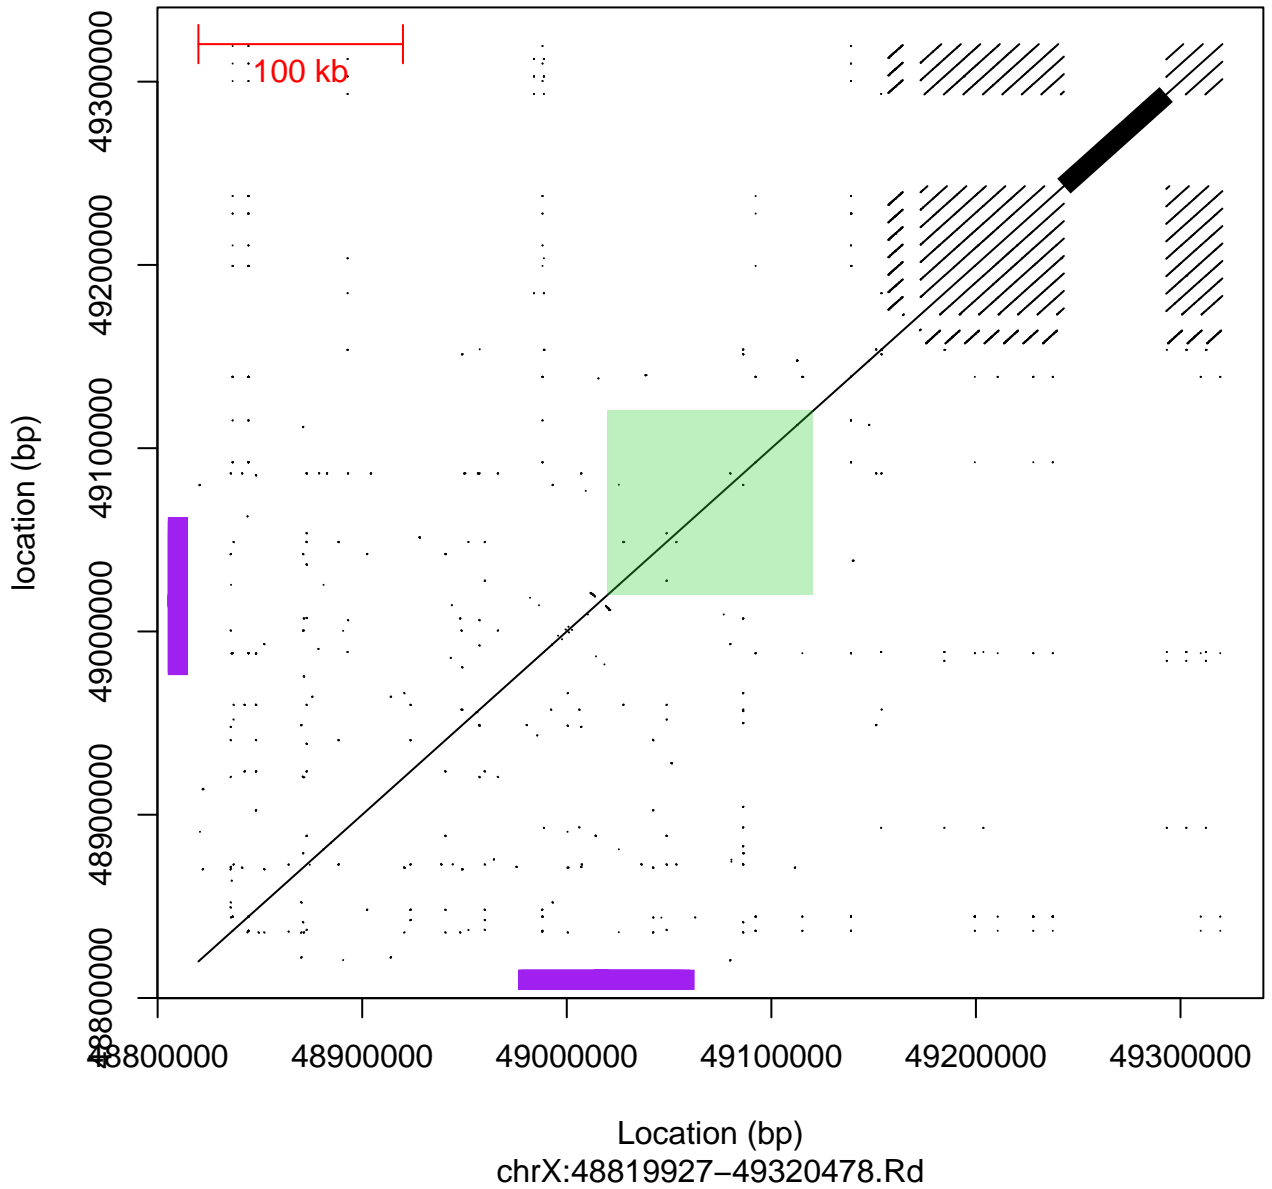



# Dotplot of ROIno.X.15 on chrX

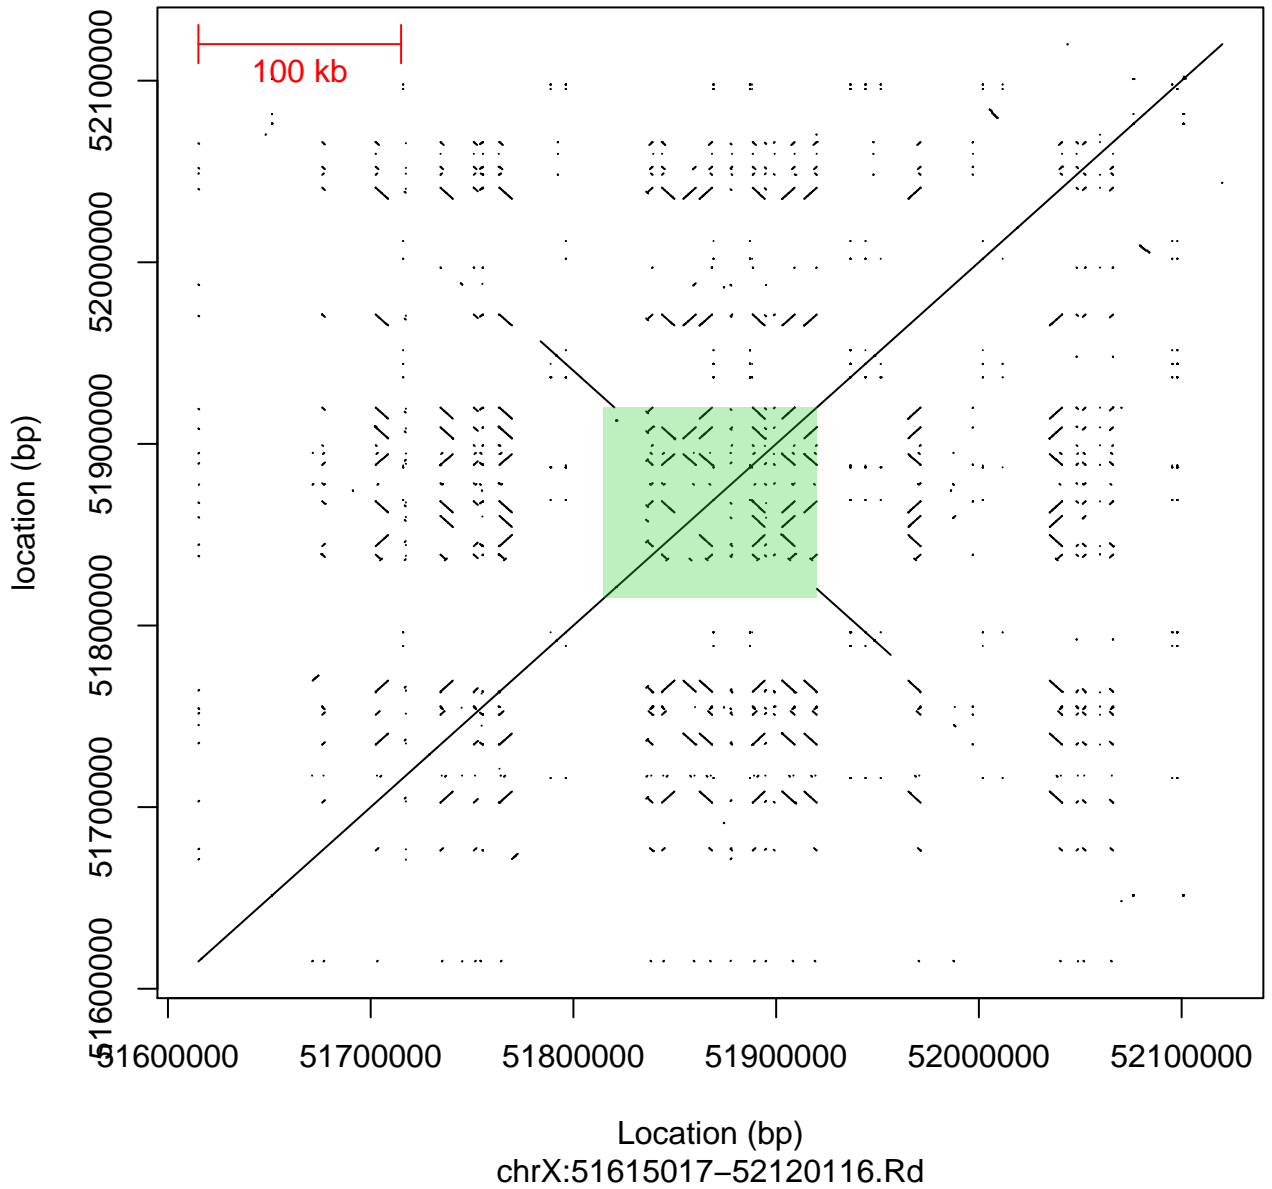

# Dotplot of mBM.X.1, ROI.No.X.22 on chrX

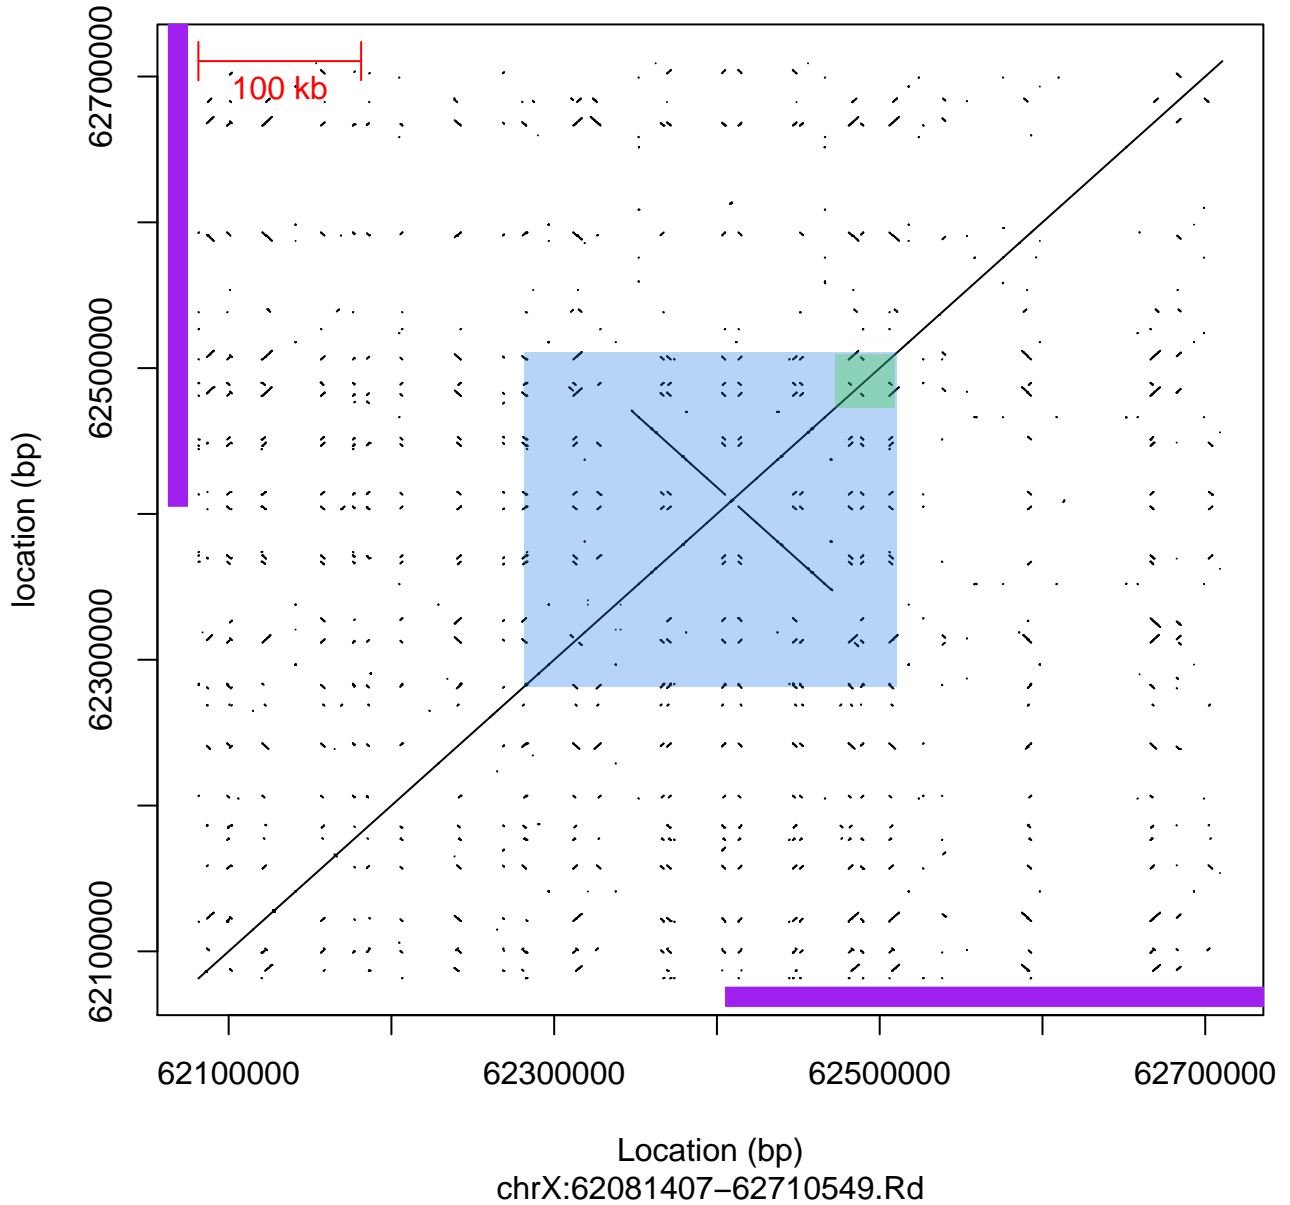

# Dotplot of ROIno.X.30 on chrX

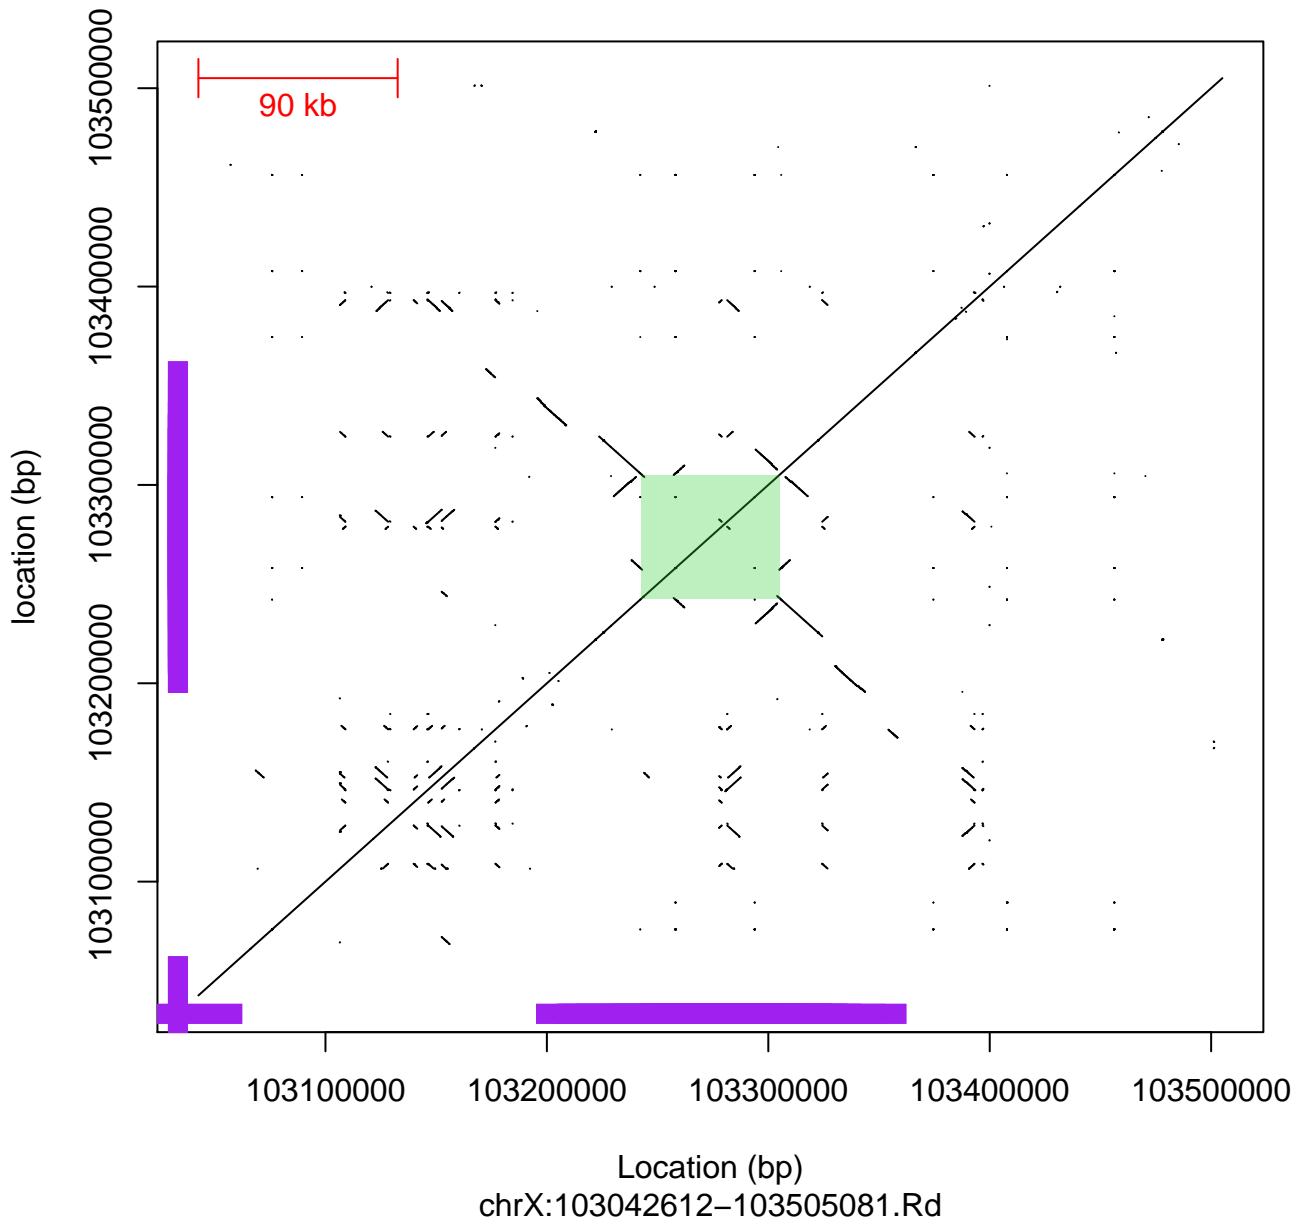

# Dotplot of ROIno.X.32 on chrX

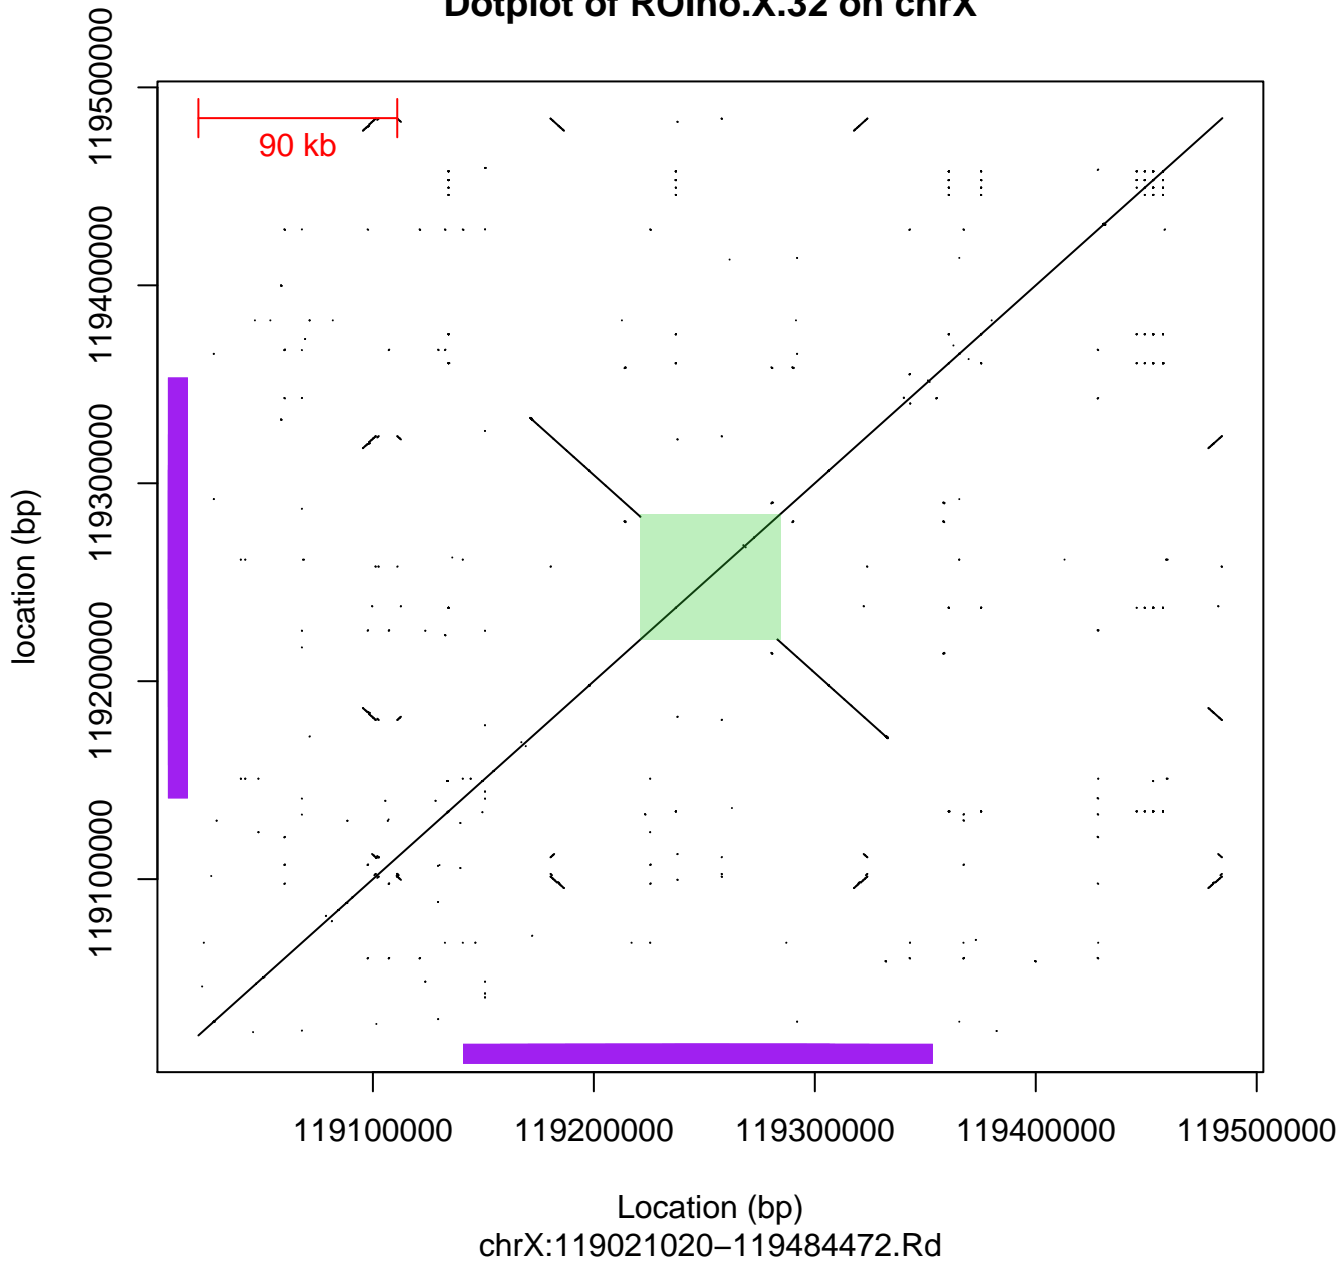

# Dotplot of ROIno.X.36 on chrX

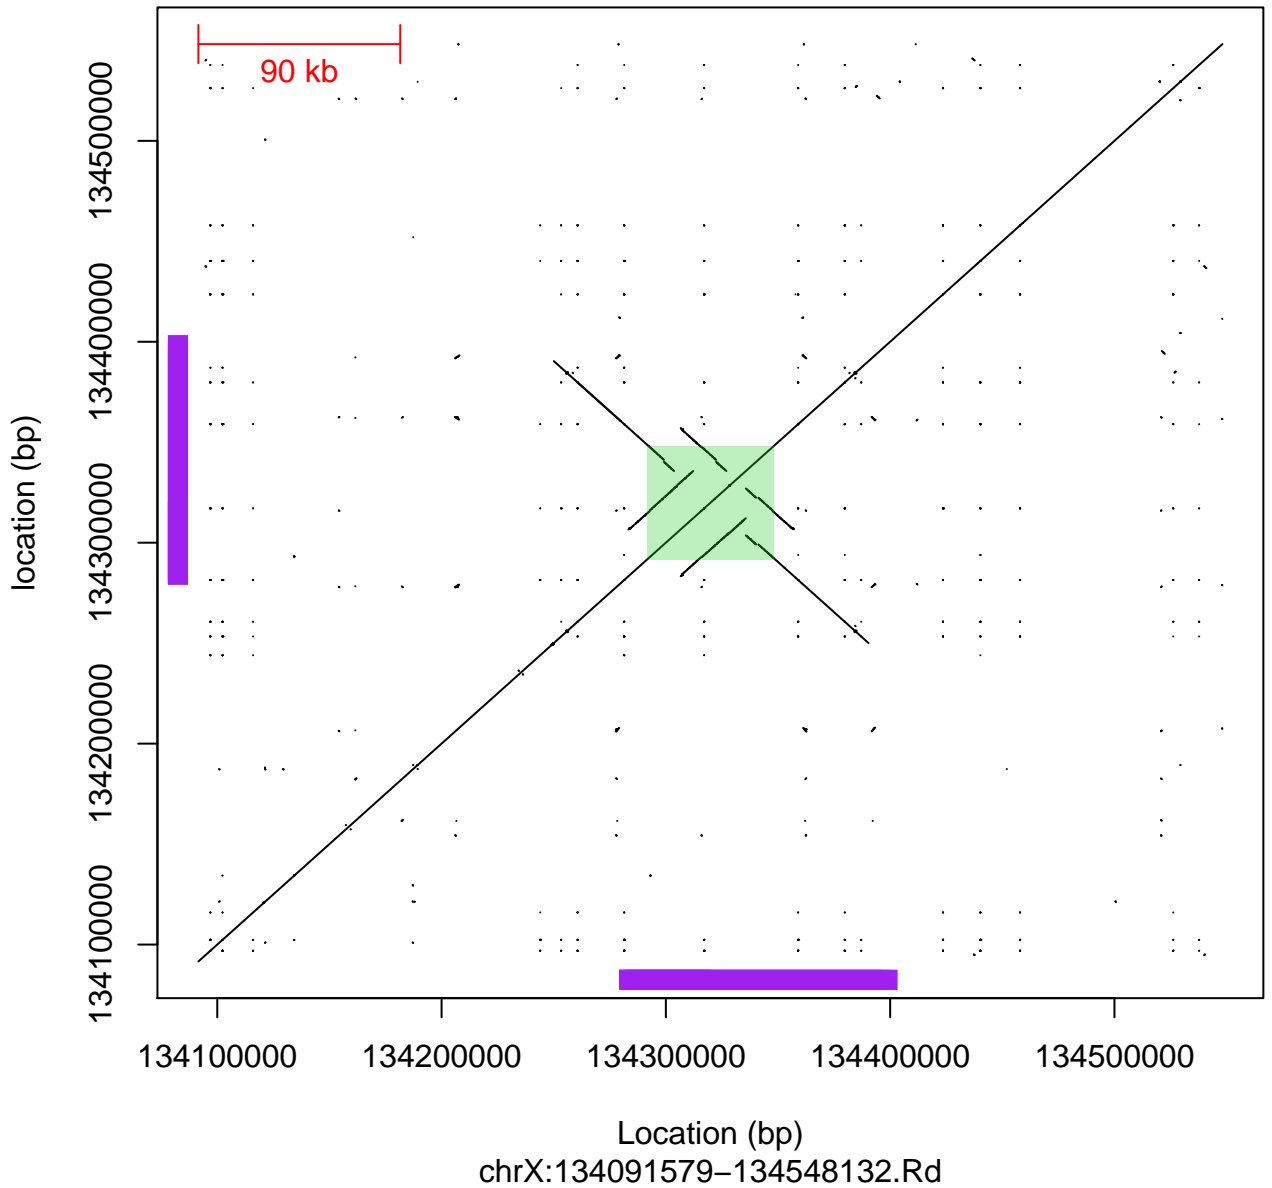

# Dotplot of fCB.X.1, ROIno.X.40 on chrX

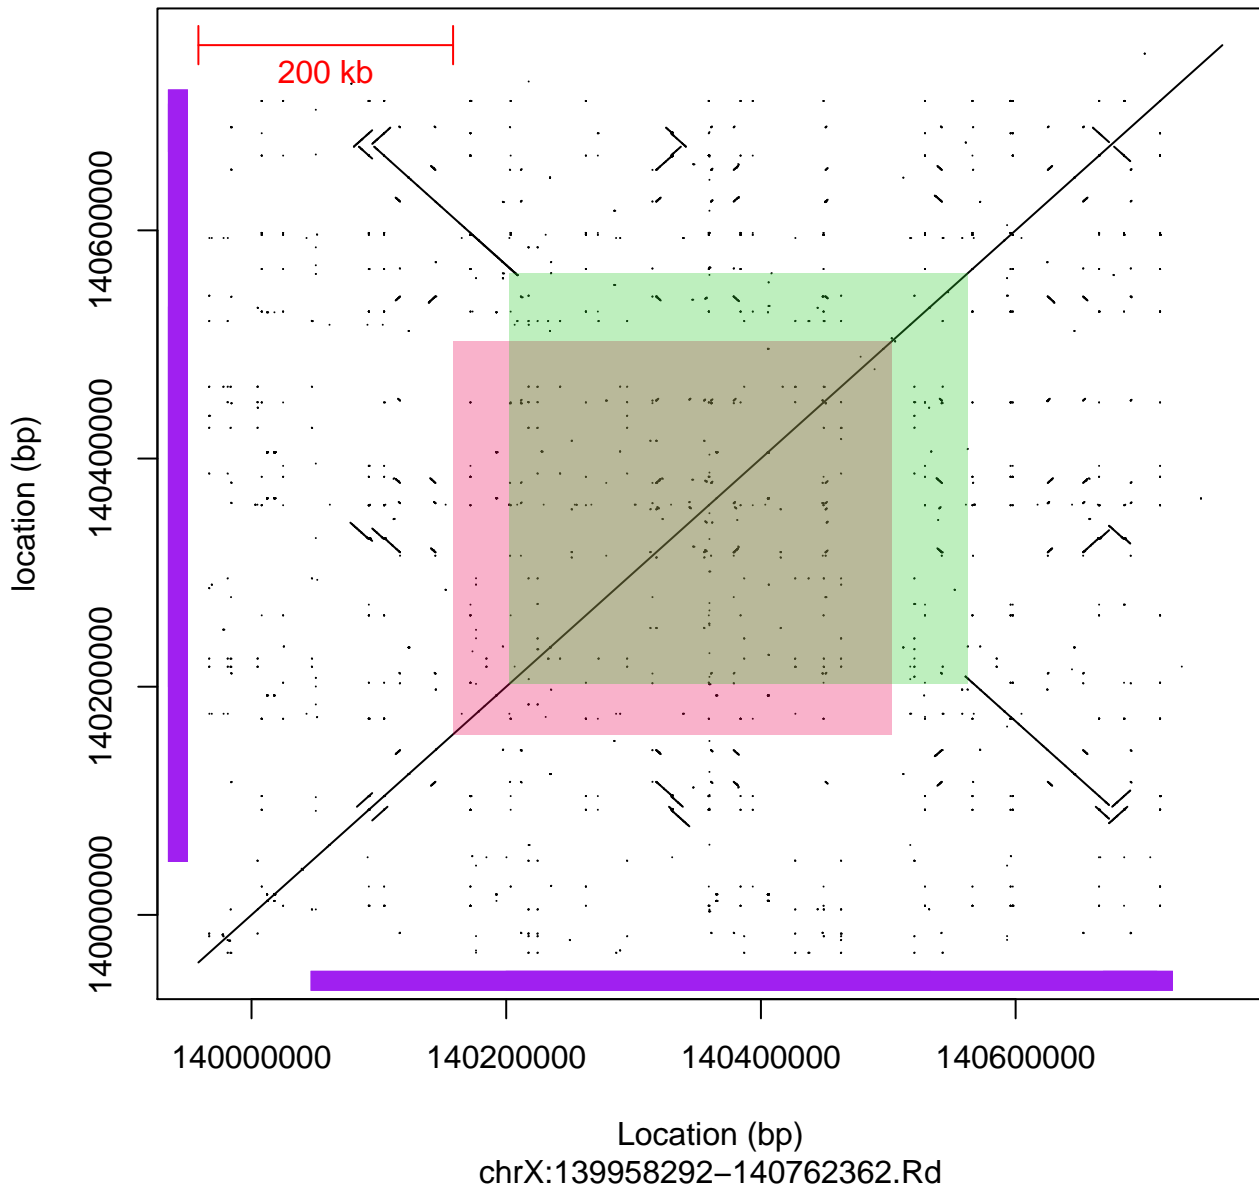

# Dotplot of fCB.X.2, ROIno.X.42 on chrX

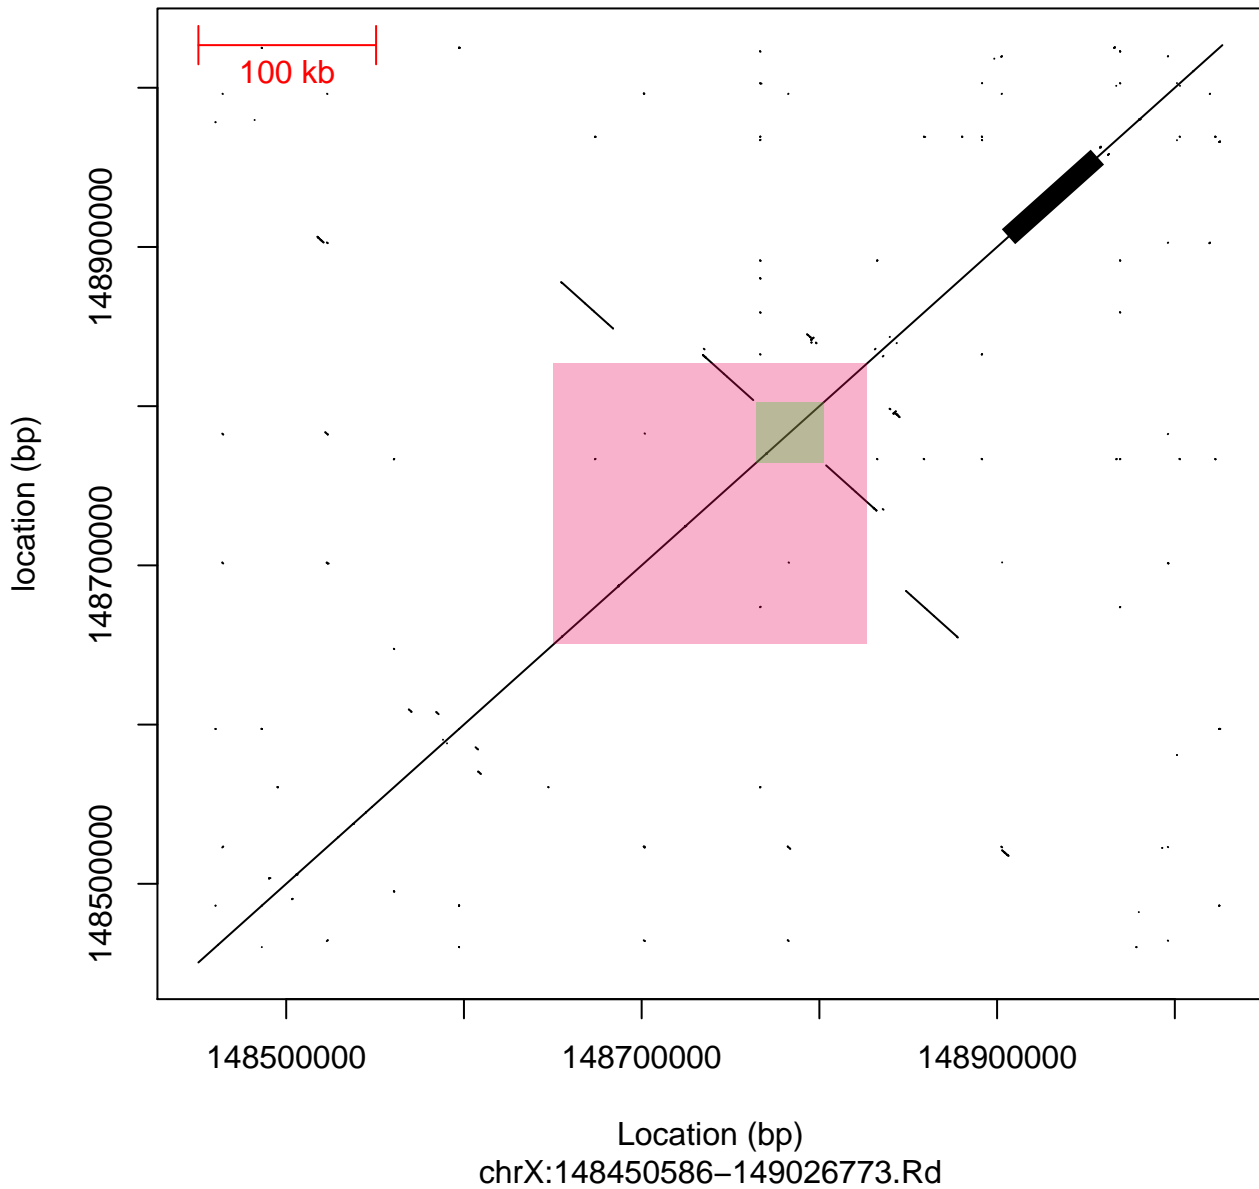

# Dotplot of mBM.X.2 on chrX

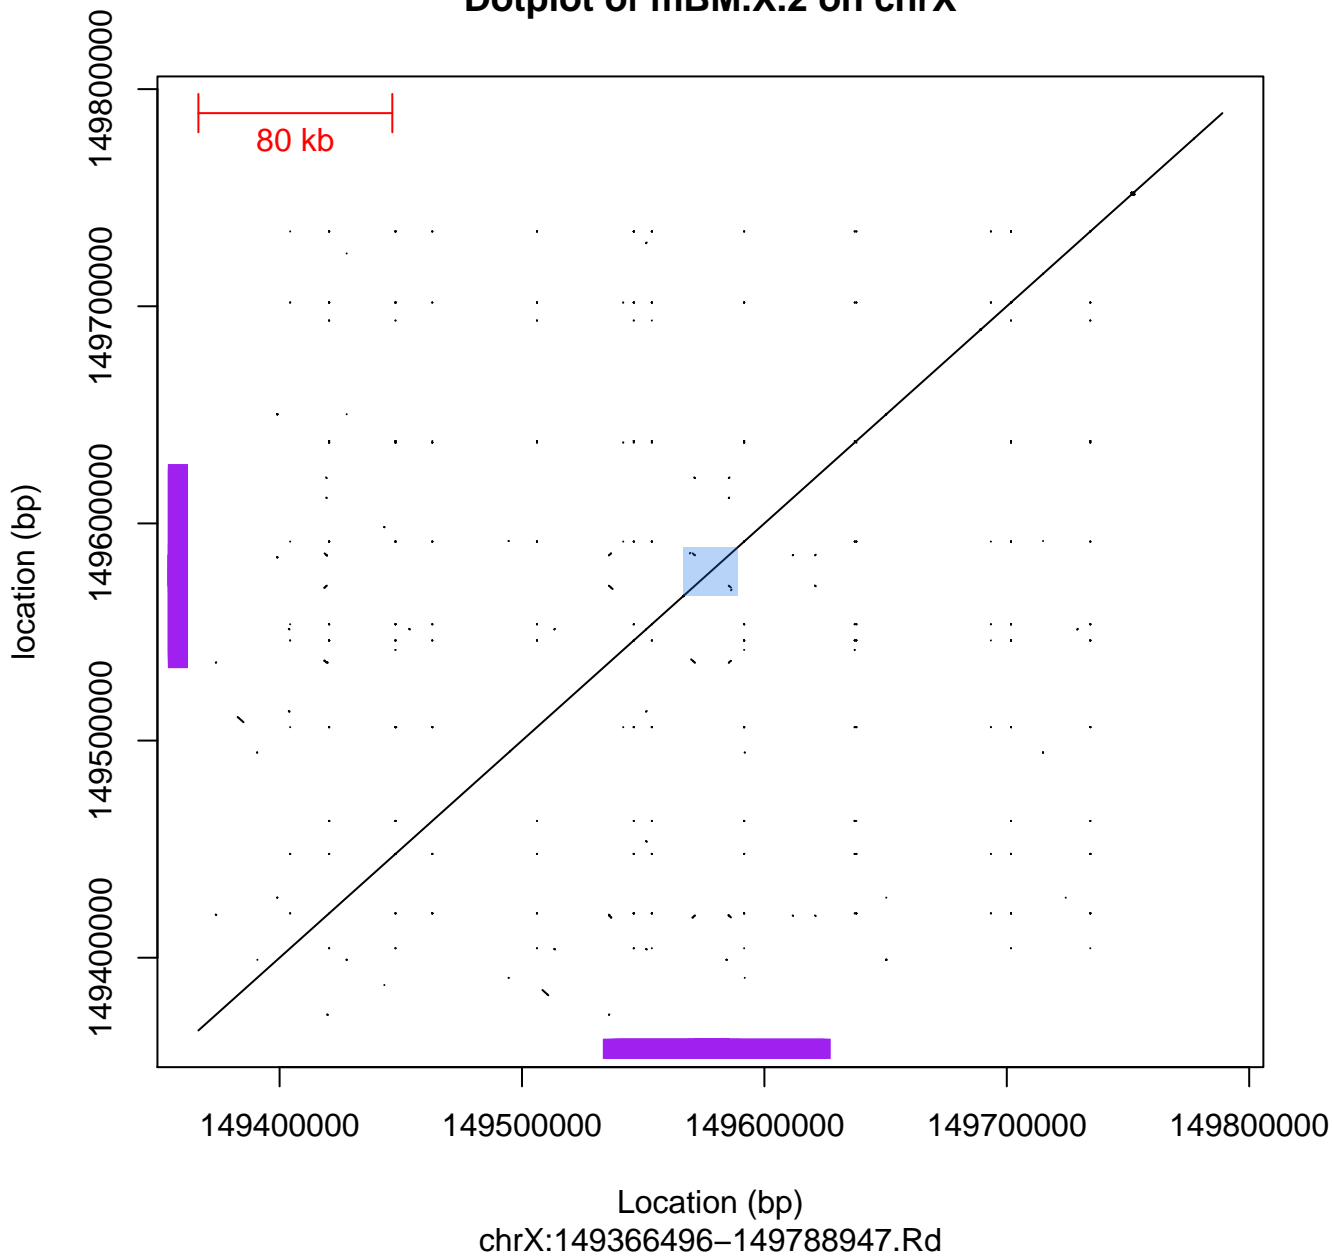



# Dotplot of mBM.X.3 on chrX

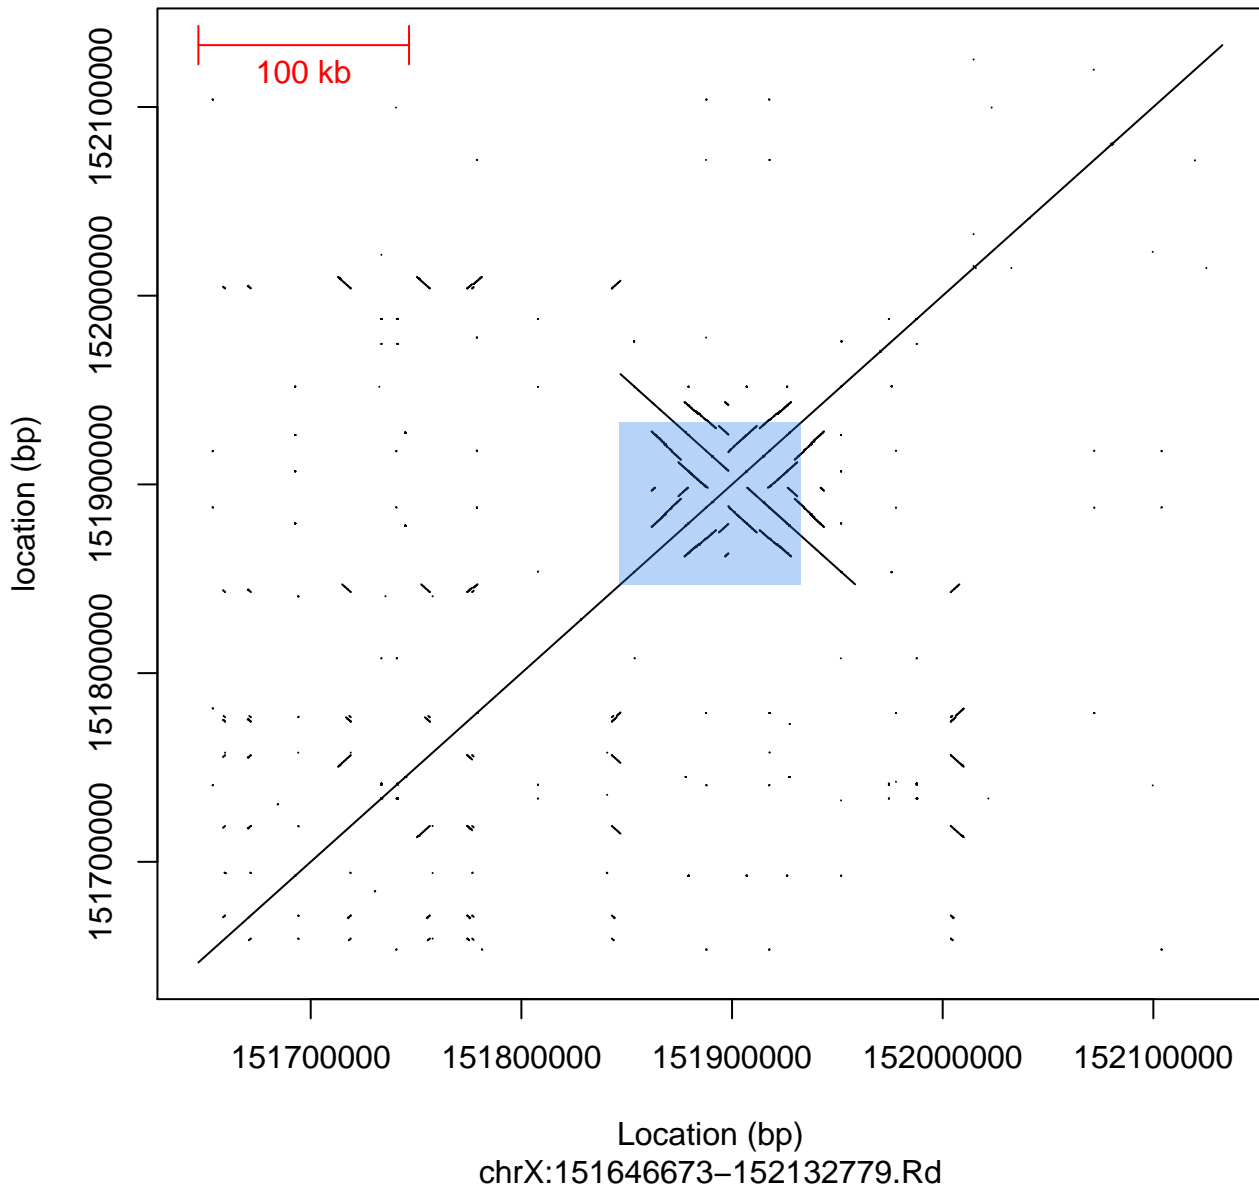

# Dotplot of mBM.X.4, fCB.X.3, ROIno.X.48 on chrX

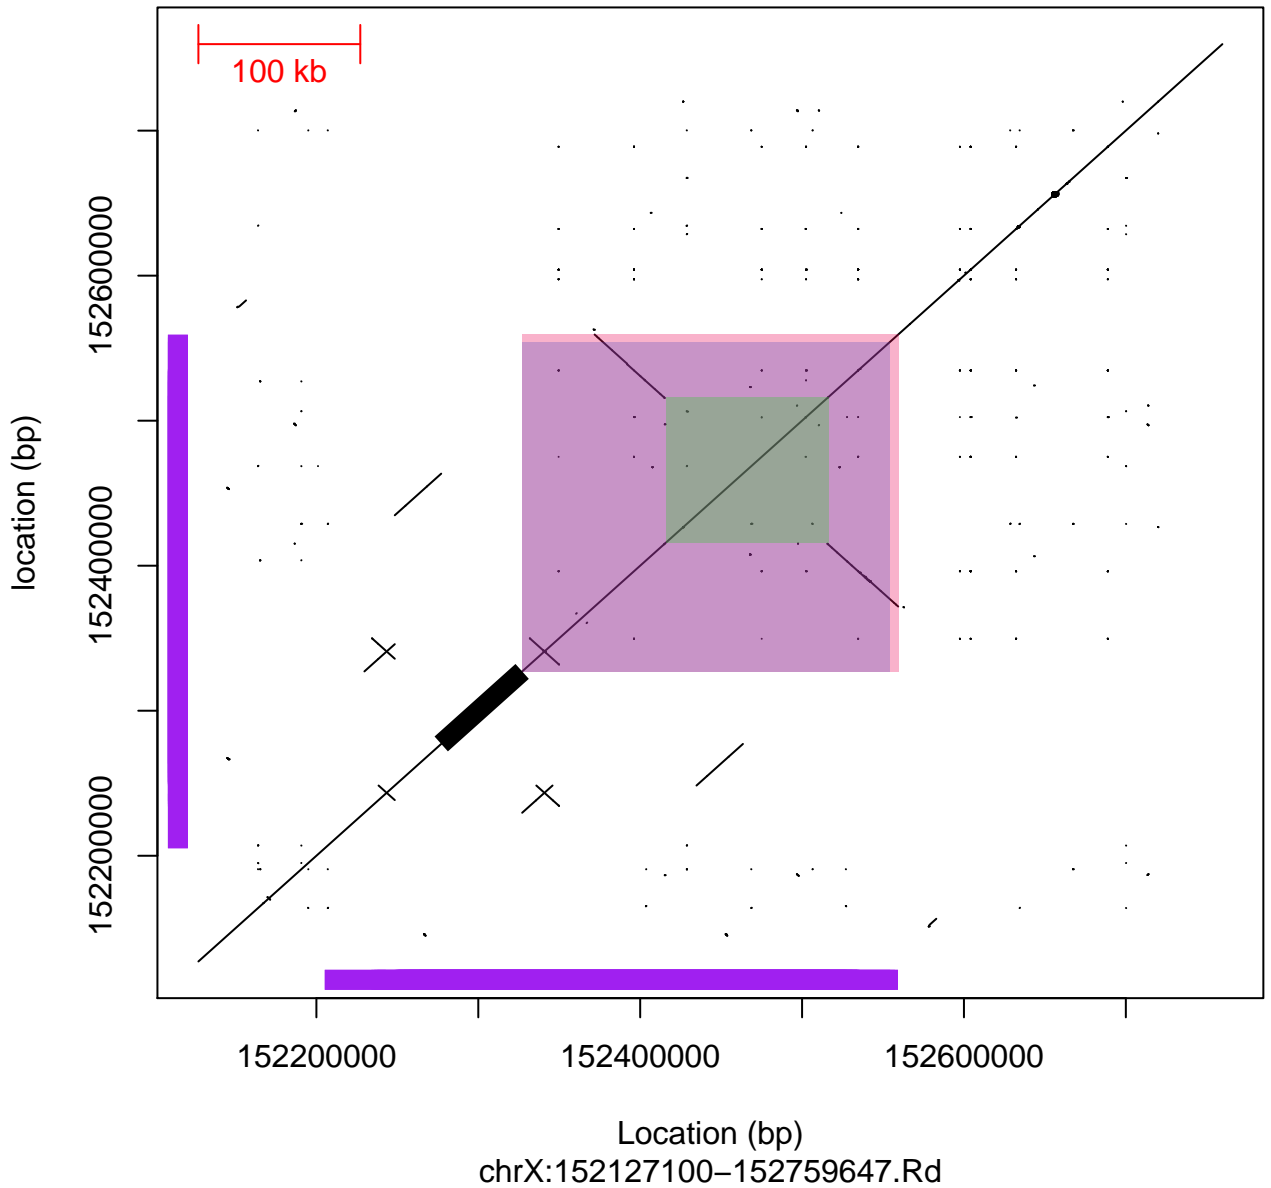

# Dotplot of mBM.Y.1 on chrY

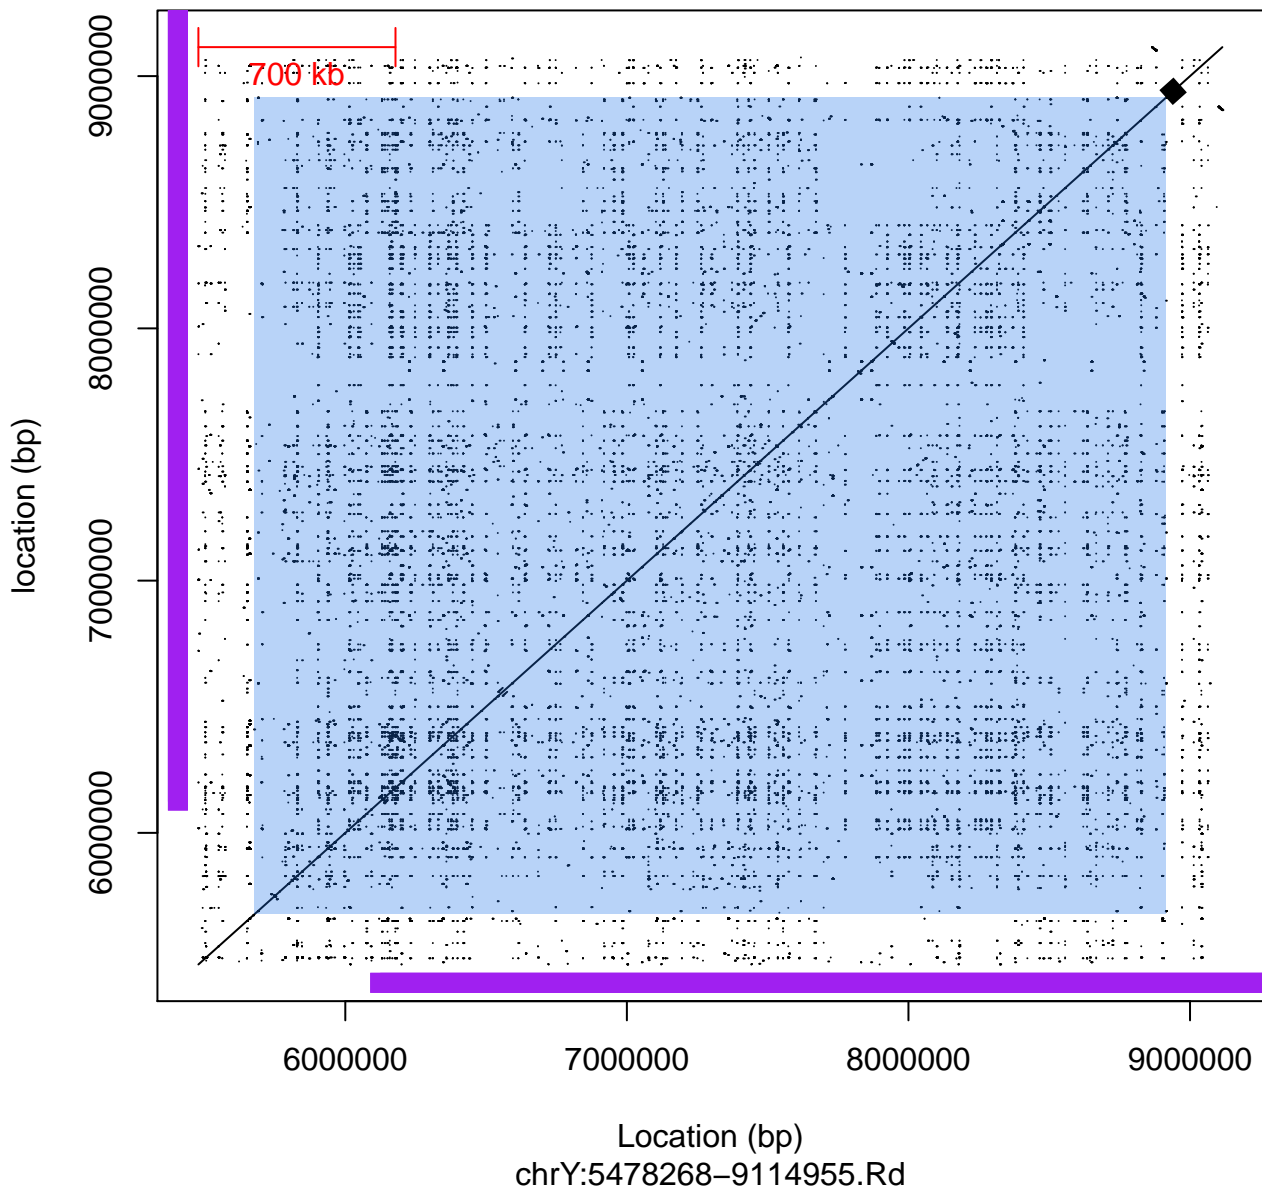

# Dotplot of mBM.Y.2 on chrY

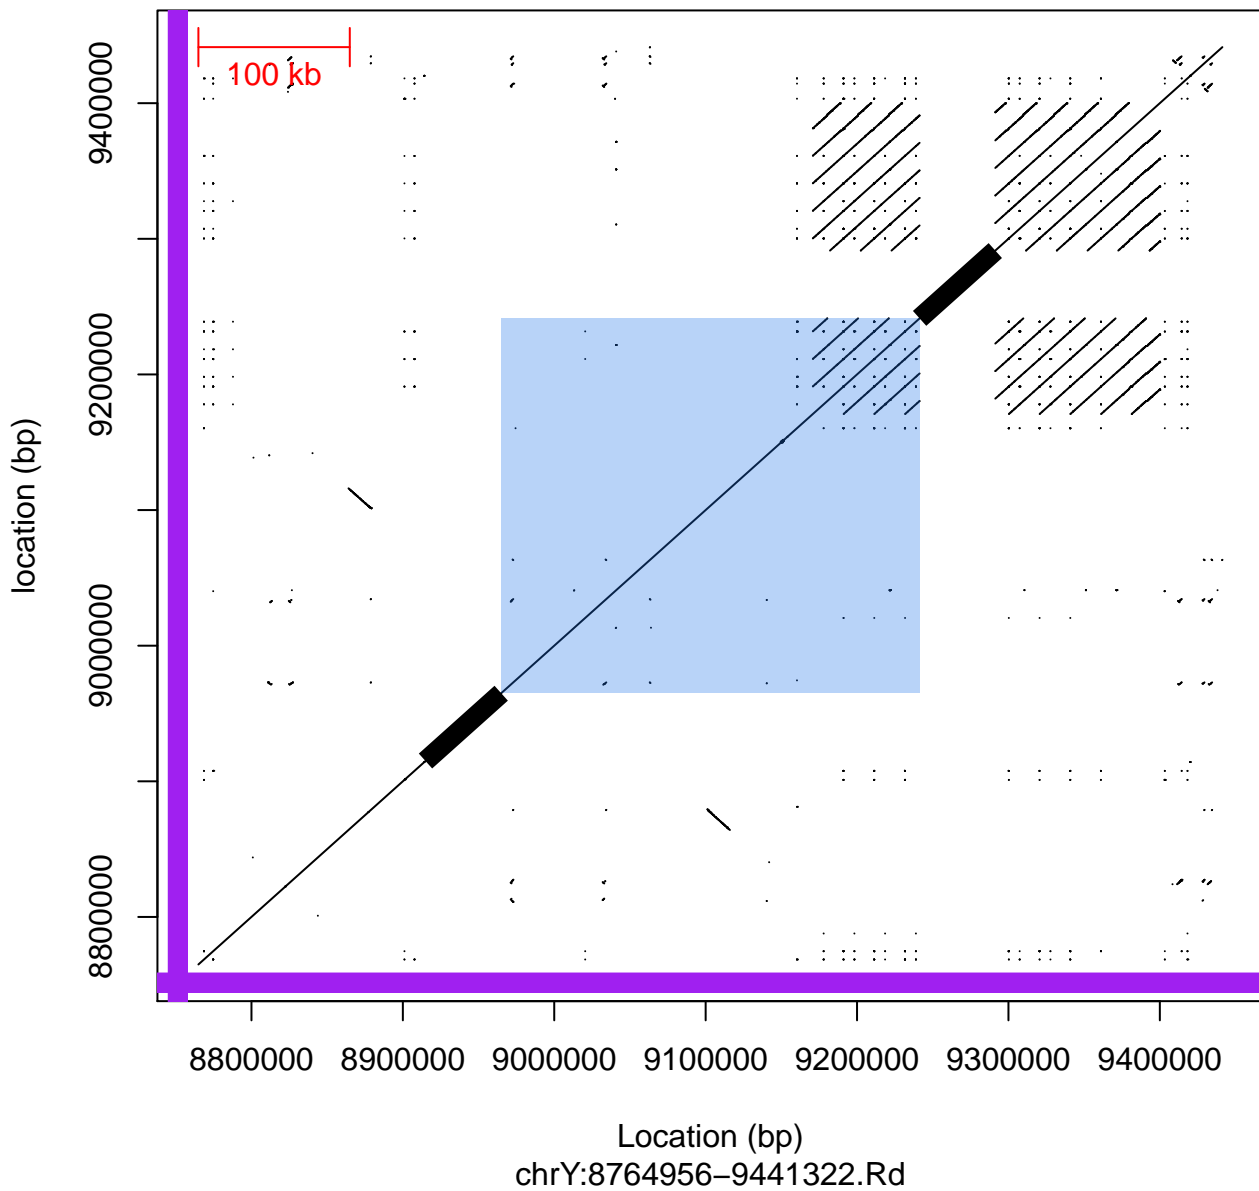

# Dotplot of mBM.Y.3 on chrY

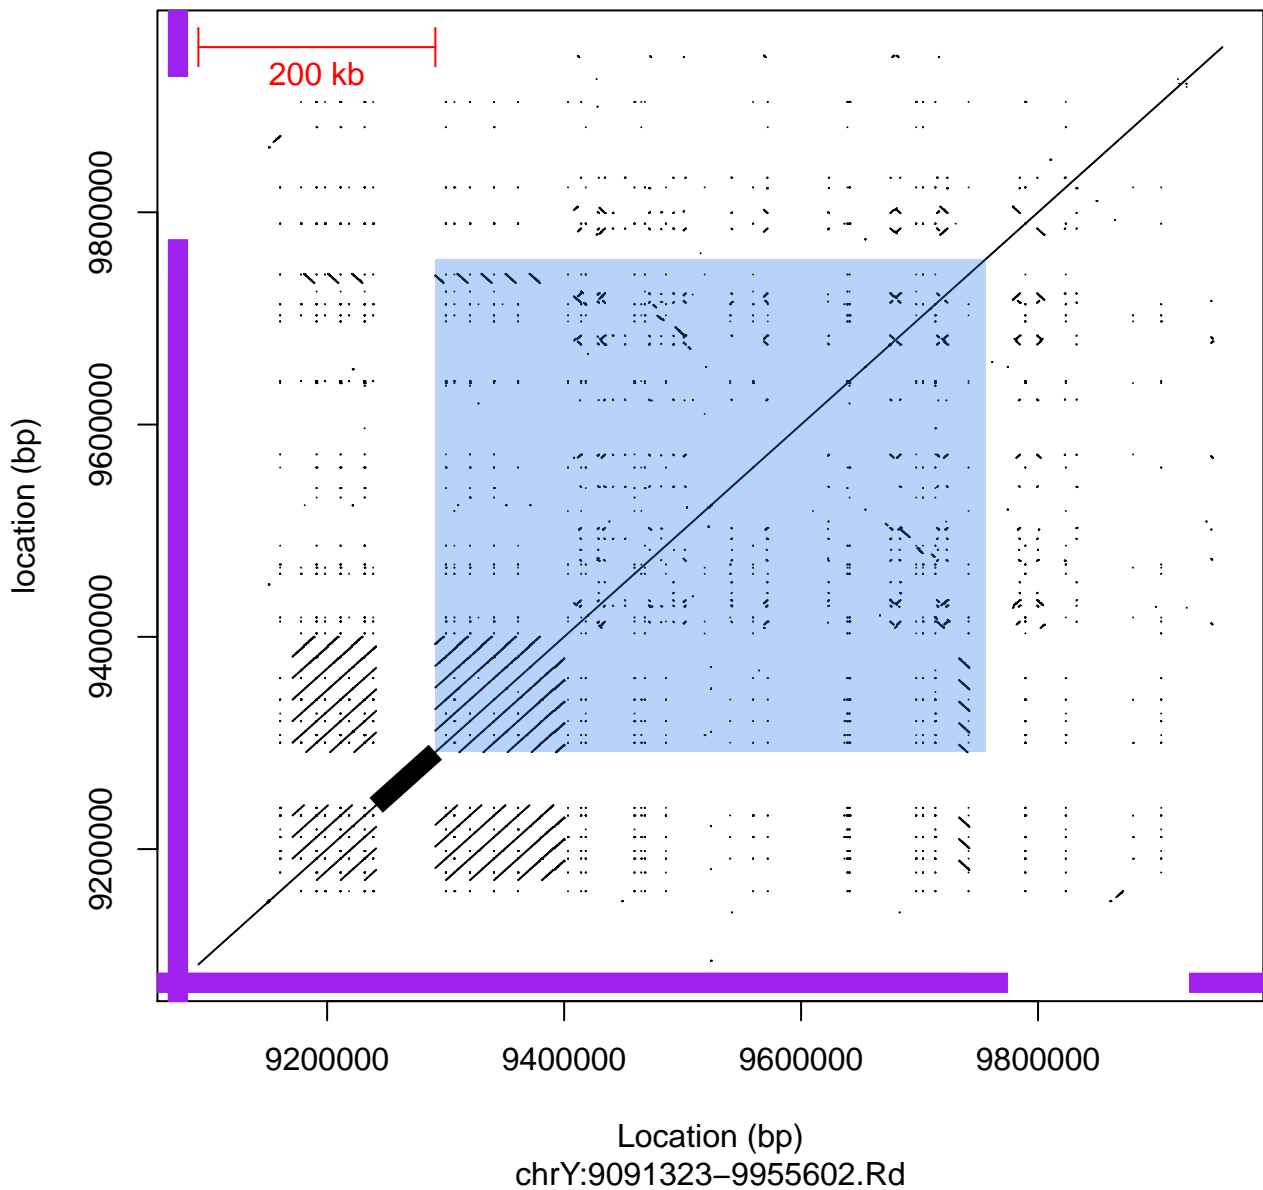

# Dotplot of mBM.Y.4 on chrY

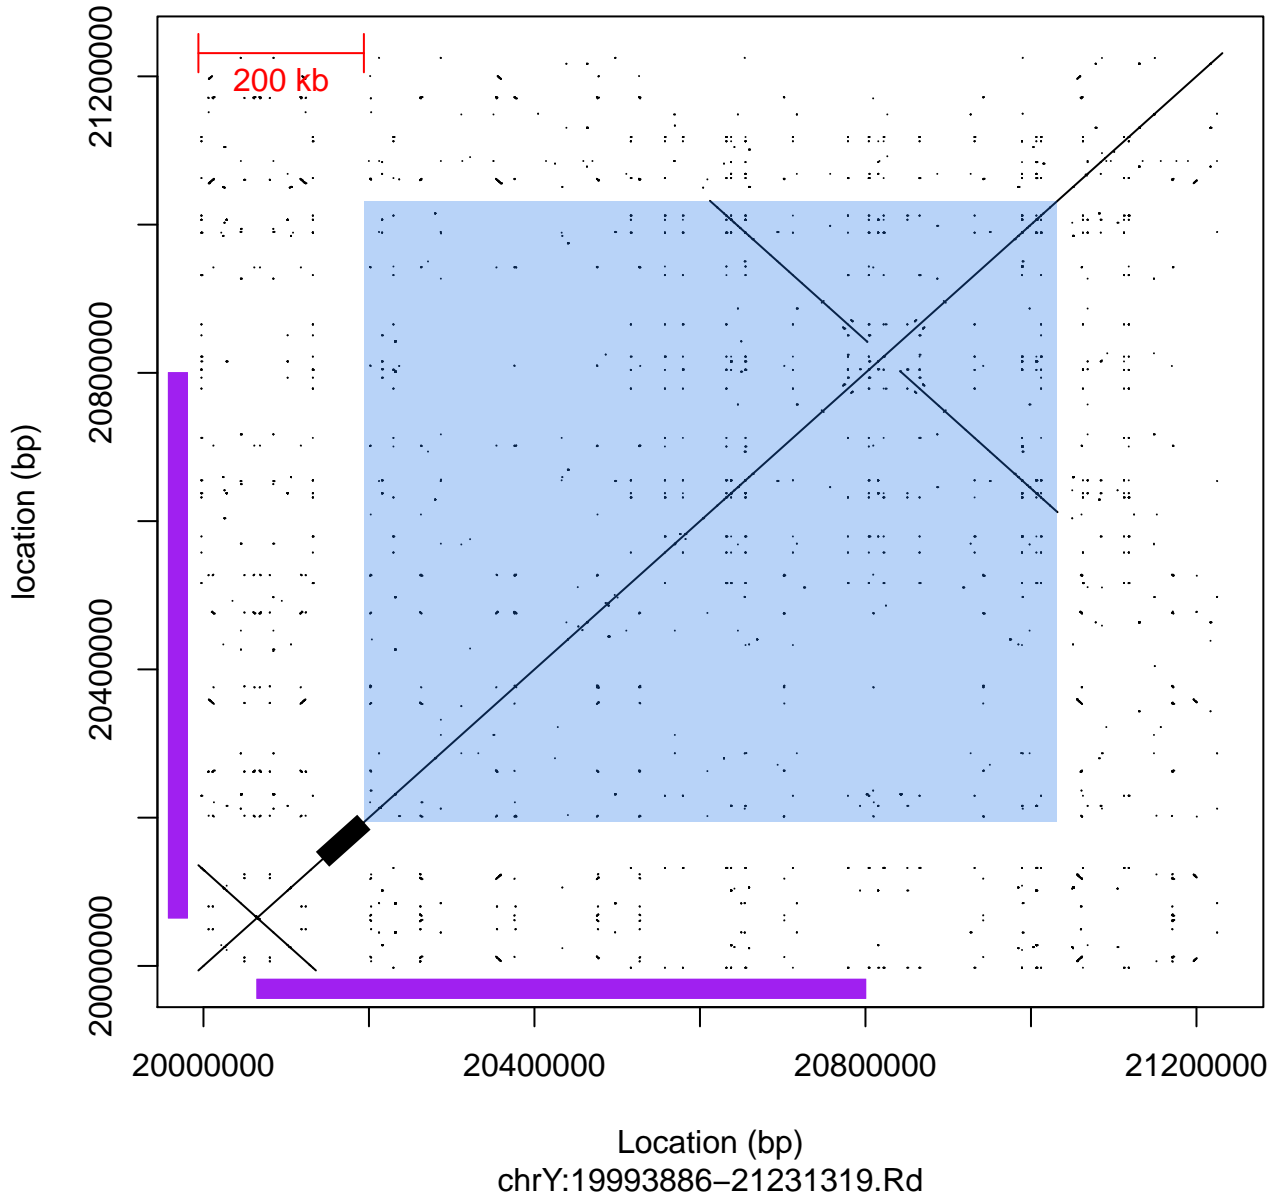

# Dotplot of mBM.Y.5 on chrY

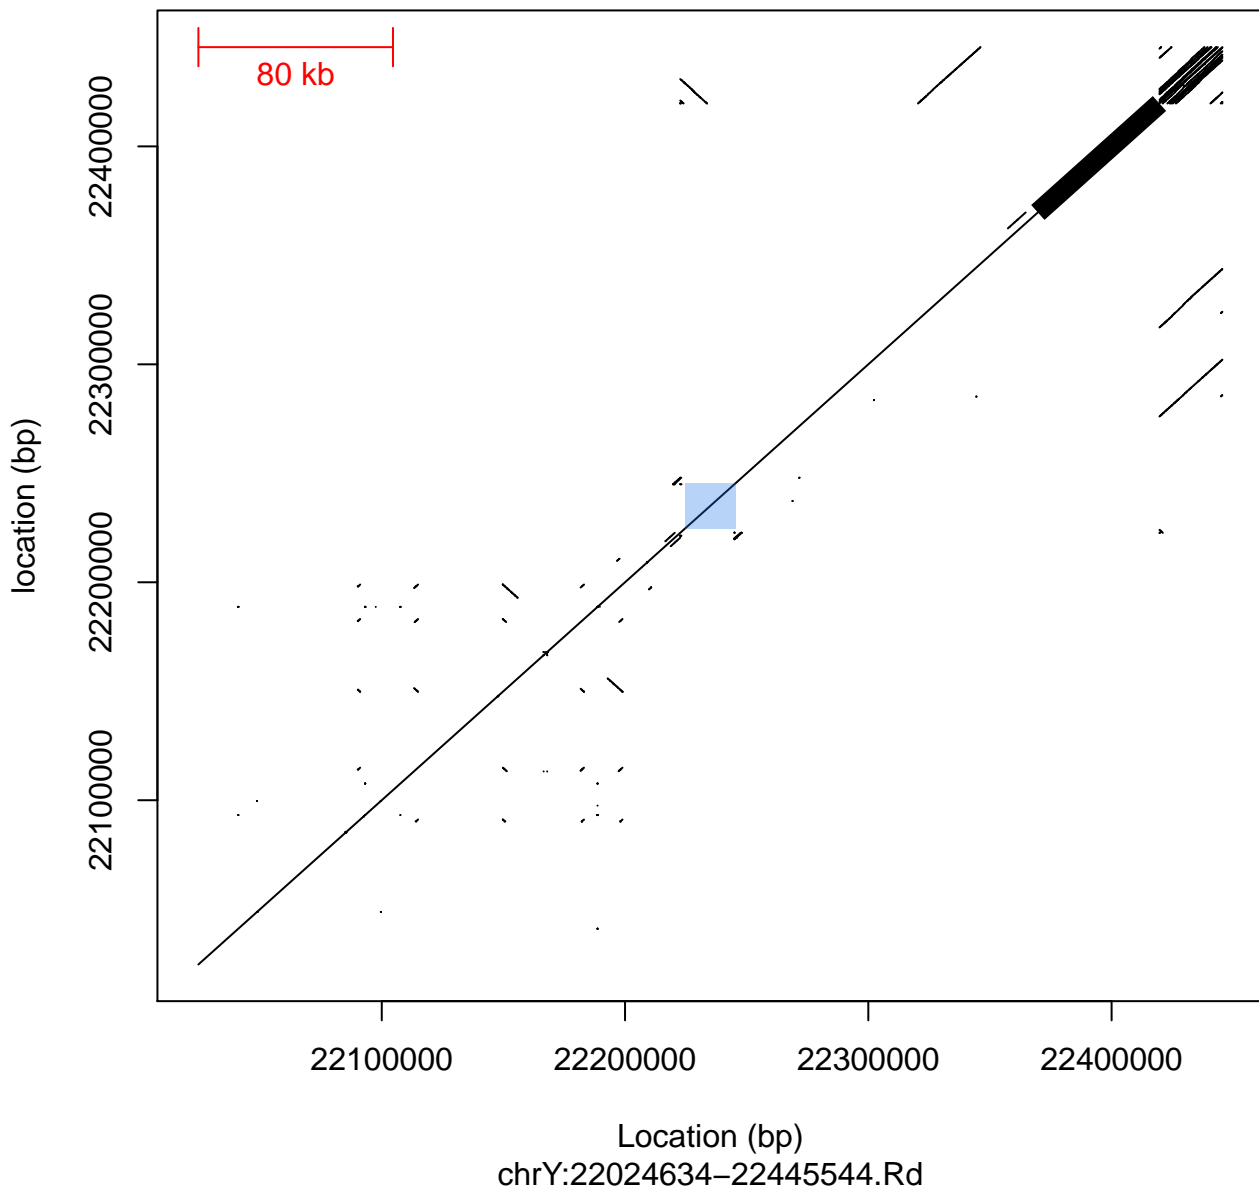

# Dotplot of mBM.Y.6 on chrY

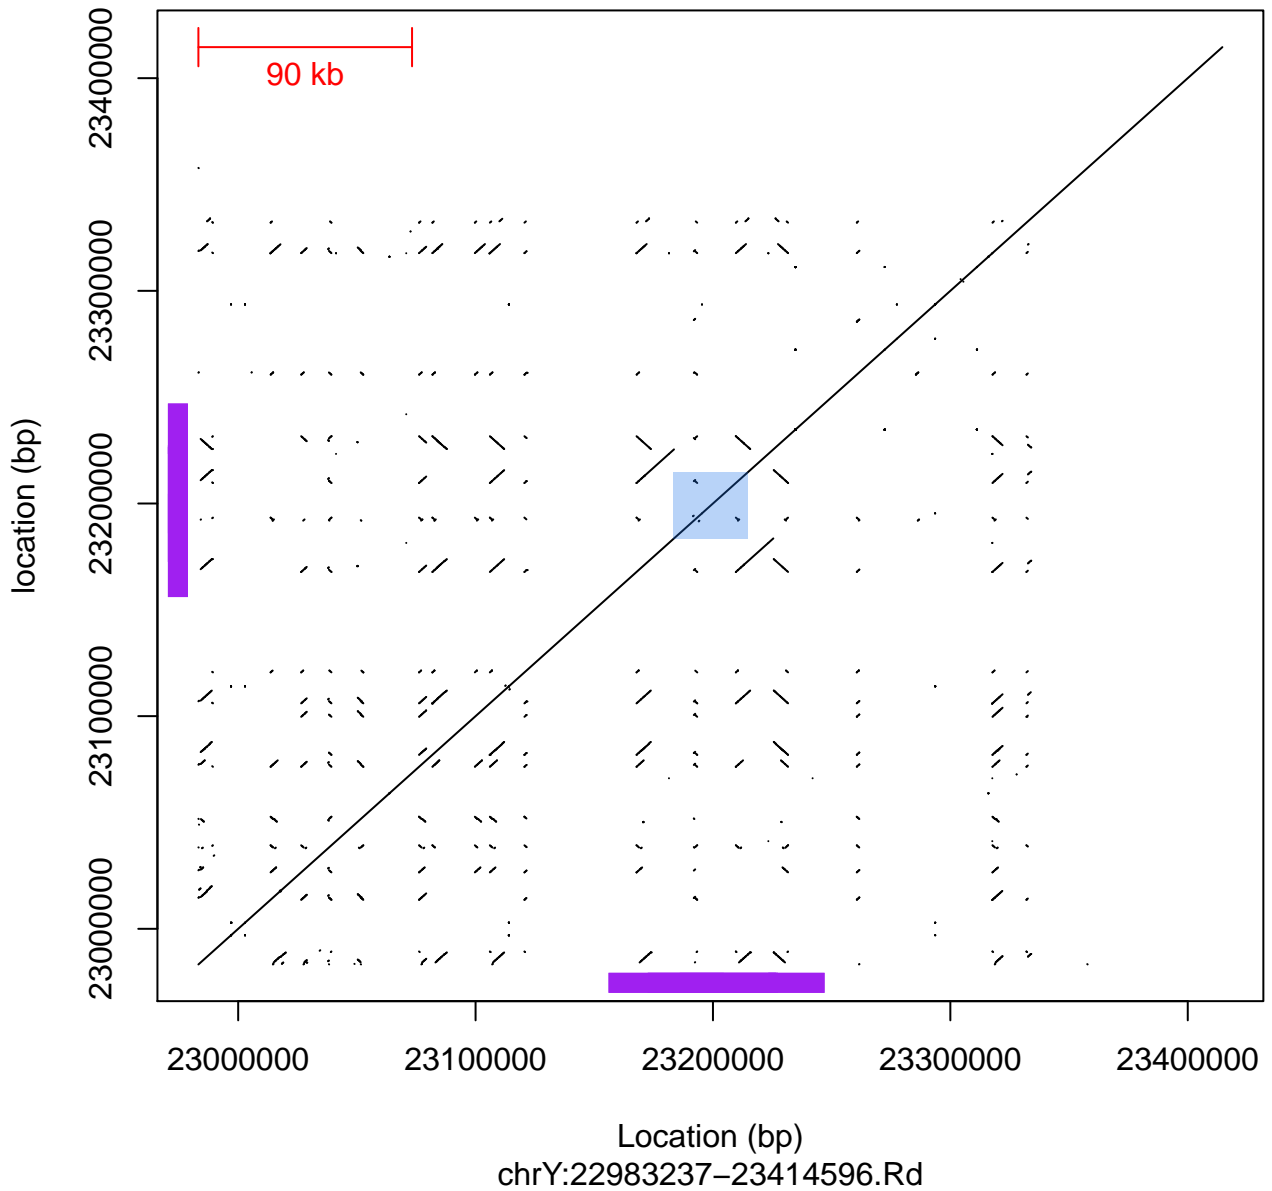



# Dotplot of mBM.Y.7, ROIno.Y.16 on chrY

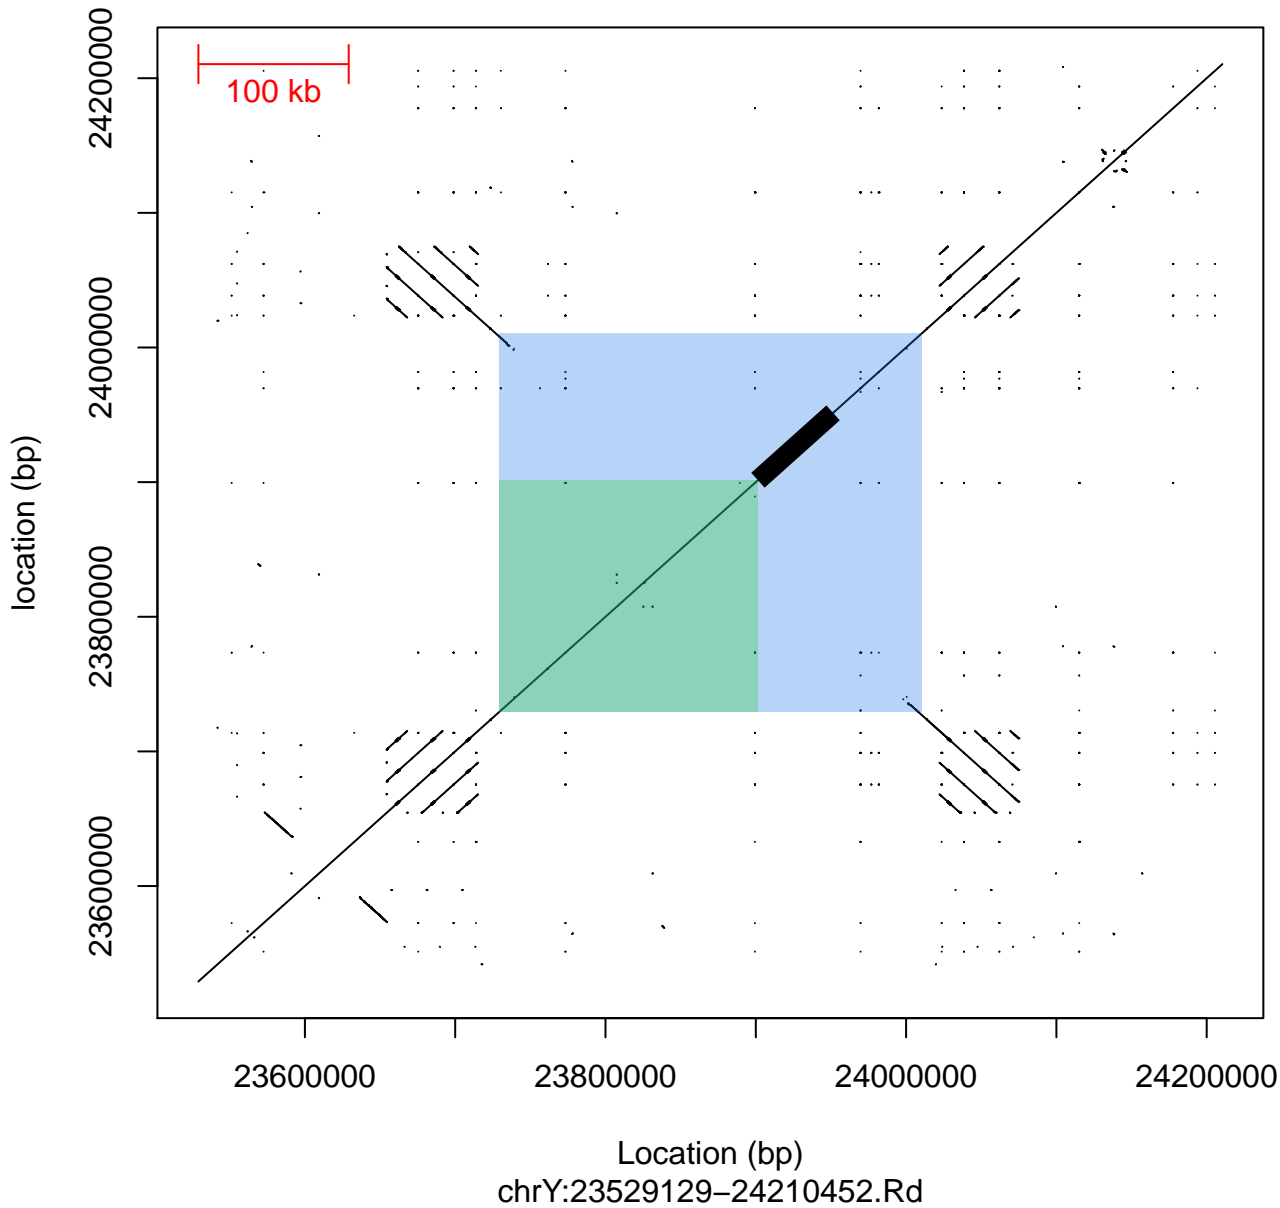

# Dotplot of mBM.Y.8, ROIno.Y.19 on chrY

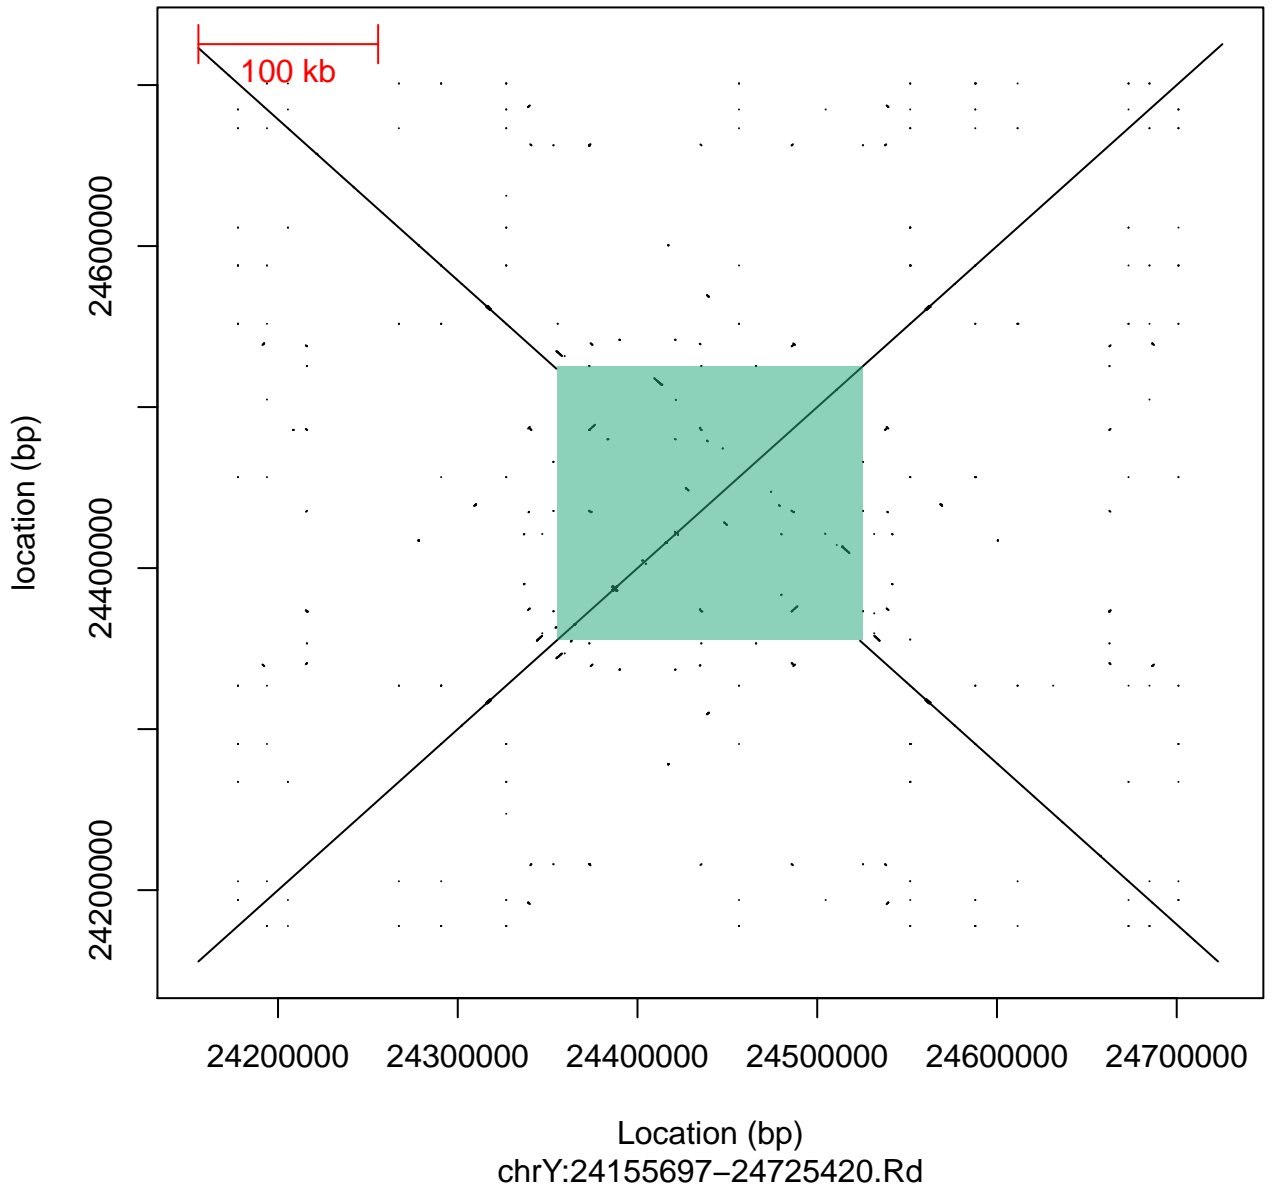

Supplement: supp_gr.201160.115_Supplemental_Data_File_S2.pdf [file supp_gr.201160.115_Supplemental_Data_File_S2.pdf]
